# Supplementary material for: α-Synuclein oligomers potentiate neuroinflammatory NF-κB activity and induce Cav3.2 calcium signaling in astrocytes
Source: PubMed Central journal article supplement (PMC10880263; doi:10.1186/s40035-024-00401-4), 2024-02-21
Supplement: 40035_2024_401_MOESM2_ESM.pdf [file 40035_2024_401_MOESM2_ESM.pdf]

| down-regulated DEGs |                |           |             |              |           |           |
|---------------------|----------------|-----------|-------------|--------------|-----------|-----------|
| baseMean            | log2FoldChange | lfcSE     | stat        | pvalue       | padj      |           |
| Trpm1               | 26.01413855    | -5.480084 | 1.321283238 | -4.147547027 | 3.36E-05  | 0.0030906 |
| Sh3bp2              | 161.5910599    | -4.249636 | 0.483734898 | -8.785051176 | 1.56E-18  | 3.32E-15  |
| Sp7                 | 140.0131634    | -4.090614 | 0.488456413 | -8.374573424 | 5.54E-17  | 9.15E-14  |
| Wnt8b               | 31.06718495    | -3.006554 | 0.868505559 | -3.461755373 | 0.0005367 | 0.0230425 |
| Sh2b2               | 108.2812779    | -2.914076 | 0.476648505 | -6.113678445 | 9.74E-10  | 5.56E-07  |
| Gpr21               | 107.7501641    | -2.747877 | 0.517401586 | -5.310916831 | 1.09E-07  | 2.66E-05  |
| Scarf2              | 78.46713512    | -2.590187 | 0.485232252 | -5.338035568 | 9.40E-08  | 2.33E-05  |
| Sh3tc1              | 58.89719437    | -2.404253 | 0.535041507 | -4.493583023 | 7.00E-06  | 0.0008743 |
| Gpx6                | 96.29556878    | -2.342897 | 0.585948397 | -3.998470498 | 6.38E-05  | 0.0050648 |
| Fgf2                | 285.6072638    | -2.323163 | 0.397644695 | -5.842309084 | 5.15E-09  | 2.07E-06  |
| Slc7a5              | 1264.564786    | -2.319142 | 0.222581525 | -10.41929059 | 2.02E-25  | 7.52E-22  |
| Myo7a               | 208.2106134    | -2.297077 | 0.414322676 | -5.544173409 | 2.95E-08  | 8.78E-06  |
| Gjc1                | 111.6021574    | -2.262136 | 0.485067179 | -4.663552049 | 3.11E-06  | 0.0004664 |
| Wdfy4               | 69.43674913    | -2.236139 | 0.498232456 | -4.48814387  | 7.18E-06  | 0.0008821 |
| Asah2               | 418.9547835    | -2.226425 | 0.238662725 | -9.328752476 | 1.07E-20  | 3.18E-17  |
| Wdhd1               | 161.9355362    | -2.091096 | 0.703379767 | -2.972925817 | 0.0029498 | 0.0758304 |
| Sinhcaf             | 90.76759901    | -2.072553 | 0.623441849 | -3.324373199 | 0.0008862 | 0.0326675 |
| Nxf7                | 37.89791868    | -2.053966 | 0.69626648  | -2.949971617 | 0.003178  | 0.0793493 |
| Efcab5              | 60.44059348    | -2.039515 | 0.659724637 | -3.091464776 | 0.0019917 | 0.0584762 |
| Primpol             | 139.4726611    | -2.008304 | 0.556451031 | -3.609130356 | 0.0003072 | 0.0156843 |
| Aim2                | 107.9234756    | -2.006427 | 0.61686487  | -3.252619474 | 0.0011435 | 0.0393225 |
| Rpe65               | 60.96648154    | -1.990683 | 0.537121425 | -3.706206398 | 0.0002104 | 0.0120071 |
| Mad2l1              | 214.8621921    | -1.95225  | 0.337402034 | -5.786123526 | 7.20E-09  | 2.55E-06  |
| Mecom               | 66.95342935    | -1.940169 | 0.497246895 | -3.901823028 | 9.55E-05  | 0.0067219 |
| Lrrc32              | 115.325776     | -1.872741 | 0.492386848 | -3.803393543 | 0.0001427 | 0.0087982 |
| Col6a4              | 152.7759068    | -1.828139 | 0.397708377 | -4.596682165 | 4.29E-06  | 0.0005851 |
| Slc26a10            | 269.8554749    | -1.823146 | 0.413354949 | -4.410605266 | 1.03E-05  | 0.001178  |
| Dennd3              | 101.8917136    | -1.660749 | 0.568831669 | -2.919578914 | 0.003505  | 0.0846682 |
| Npas4               | 422.8349899    | -1.559508 | 0.26372631  | -5.913357493 | 3.35E-09  | 1.51E-06  |
| Slc4a11             | 124.8194914    | -1.497601 | 0.432936434 | -3.459171633 | 0.0005418 | 0.0231976 |
| Per2                | 1063.54716     | -1.449582 | 0.180045193 | -8.051209394 | 8.20E-16  | 1.11E-12  |
| Mroh7               | 140.3082992    | -1.445721 | 0.371029092 | -3.89651742  | 9.76E-05  | 0.0067745 |
| Crybg3              | 683.1376367    | -1.409763 | 0.23966677  | -5.882179164 | 4.05E-09  | 1.67E-06  |
| Papln               | 120.8585202    | -1.398141 | 0.400505002 | -3.490945988 | 0.0004813 | 0.0213445 |
| Fam117a             | 168.5011942    | -1.364696 | 0.340841444 | -4.003901808 | 6.23E-05  | 0.0049823 |
| Egr4                | 1365.895291    | -1.356837 | 0.228629294 | -5.934657664 | 2.94E-09  | 1.41E-06  |
| Nrros               | 115.2705979    | -1.352037 | 0.386096056 | -3.501814181 | 0.0004621 | 0.0206781 |
| Dmkn                | 230.619134     | -1.345443 | 0.366577115 | -3.67028746  | 0.0002423 | 0.0133307 |
| Stk26               | 711.1439498    | -1.318012 | 0.22748283  | -5.793896966 | 6.88E-09  | 2.55E-06  |
| Map3k1              | 273.675819     | -1.317557 | 0.327435207 | -4.023872113 | 5.72E-05  | 0.004725  |
| Casp8ap2            | 404.1693947    | -1.303726 | 0.458722901 | -2.842077536 | 0.0044821 | 0.0990855 |
| Nexn                | 1401.224201    | -1.297711 | 0.17121014  | -7.579639041 | 3.47E-14  | 4.29E-11  |
| Cnot6l              | 1154.254713    | -1.283569 | 0.323229261 | -3.971080341 | 7.15E-05  | 0.0054783 |
| Scube3              | 645.7510004    | -1.281806 | 0.286057602 | -4.480938063 | 7.43E-06  | 0.0009049 |
| Tacr3               | 159.8175453    | -1.276207 | 0.390816649 | -3.26548898  | 0.0010928 | 0.0381975 |
| Nsun6               | 133.5876816    | -1.271035 | 0.362054159 | -3.510621583 | 0.0004471 | 0.0203728 |

| Up-regulated DEGs |                |           |            |             |             |           |
|-------------------|----------------|-----------|------------|-------------|-------------|-----------|
| baseMean          | log2FoldChange | lfcSE     | stat       | pvalue      | padj        |           |
| Mylk3             | 43.20092346    | 4.3868356 | 1.18303499 | 3.708119907 | 0.000208804 | 0.0119768 |
| Shox2             | 19.99307268    | 4.3483662 | 1.41906394 | 3.064249628 | 0.002182167 | 0.0617491 |
| Pappa2            | 20.07707275    | 4.3269335 | 1.26009978 | 3.43380228  | 0.000595178 | 0.0247754 |
| Prnp              | 76981.57491    | 3.9796046 | 0.13608067 | 29.24445142 | 5.28E-188   | 7.85E-184 |
| Prom2             | 27.67704219    | 3.8029756 | 1.23460243 | 3.080324052 | 0.002067755 | 0.0597272 |
| Adcyap1           | 171.4871274    | 3.4642549 | 0.74989808 | 4.619634267 | 3.84E-06    | 0.0005388 |
| Npsr1             | 22.99728544    | 3.168092  | 1.06094069 | 2.986115975 | 0.002825455 | 0.0735779 |
| Snca              | 12477.44334    | 3.0002843 | 0.15231995 | 19.69725081 | 2.28E-86    | 1.69E-82  |
| Neurod1           | 58.40333333    | 2.9824479 | 0.75115442 | 3.970485696 | 7.17E-05    | 0.0054783 |
| Tspan11           | 92.71838078    | 2.8946039 | 0.89588845 | 3.230986955 | 0.001233636 | 0.041938  |
| Hkdc1             | 131.4911391    | 2.8627857 | 0.84081618 | 3.404770045 | 0.000662198 | 0.0269271 |
| Trim7             | 63.16171903    | 2.8258949 | 0.57874815 | 4.882771381 | 1.05E-06    | 0.0001919 |
| Impg2             | 27.34604466    | 2.7699987 | 0.8875794  | 3.120846132 | 0.001803322 | 0.0541215 |
| Fam19a1           | 227.6961469    | 2.5653612 | 0.65816401 | 3.89775372  | 9.71E-05    | 0.0067716 |
| Met               | 90.81755012    | 2.486467  | 0.8581749  | 2.897389619 | 0.003762821 | 0.0892191 |
| Prdm8             | 153.2796276    | 2.4748653 | 0.51937473 | 4.765085983 | 1.89E-06    | 0.0003082 |
| C1qtnf1           | 64.02895771    | 2.4714686 | 0.73051572 | 3.383183291 | 0.000716508 | 0.0281599 |
| Vip               | 246.6872659    | 2.4679816 | 0.41281376 | 5.978438454 | 2.25E-09    | 1.12E-06  |
| Cenpa             | 40.26770623    | 2.4288921 | 0.70736567 | 3.43371503  | 0.00059537  | 0.0247754 |
| Podn              | 69.4100887     | 2.3945592 | 0.81478237 | 2.938894225 | 0.003293855 | 0.0810157 |
| Emx1              | 167.4255044    | 2.374673  | 0.61695488 | 3.849022226 | 0.00011859  | 0.0076933 |
| mt-Co2            | 8325.562003    | 2.3614367 | 0.19727322 | 11.97038692 | 5.08E-33    | 2.52E-29  |
| Rps28             | 386.6420421    | 2.3022405 | 0.26032696 | 8.843650166 | 9.26E-19    | 2.29E-15  |
| Col12a1           | 189.9482988    | 2.2935473 | 0.62654175 | 3.66064556  | 0.000251581 | 0.0136503 |
| Adamts12          | 94.7942534     | 2.2610936 | 0.60624862 | 3.729647369 | 0.000191748 | 0.0110841 |
| Smoc2             | 84.10586503    | 2.214574  | 0.55266453 | 4.007085395 | 6.15E-05    | 0.0049632 |
| Doc2a             | 298.1551397    | 2.2046055 | 0.49930555 | 4.41534338  | 1.01E-05    | 0.0011705 |
| Etnk2             | 70.7551162     | 1.9940091 | 0.65957582 | 3.023168937 | 0.002501426 | 0.0678124 |
| Cck               | 2016.776002    | 1.9617042 | 0.28923175 | 6.782464978 | 1.18E-11    | 1.03E-08  |
| Rtn4r             | 629.120907     | 1.9448194 | 0.45134967 | 4.308897386 | 1.64E-05    | 0.0016581 |
| Bhlhe22           | 247.3705934    | 1.9208954 | 0.43392205 | 4.426821445 | 9.56E-06    | 0.0011187 |
| Neurod2           | 634.6375267    | 1.9178412 | 0.43900054 | 4.368653377 | 1.25E-05    | 0.0013361 |
| P4ha3             | 129.3513054    | 1.9166323 | 0.39577207 | 4.842767855 | 1.28E-06    | 0.0002281 |
| Nwd2              | 392.759076     | 1.909466  | 0.34980316 | 5.458687043 | 4.80E-08    | 1.34E-05  |
| Pgk1-rs7          | 1249.890437    | 1.9077539 | 0.29870347 | 6.386781927 | 1.69E-10    | 1.14E-07  |
| Crh               | 74.9649257     | 1.900171  | 0.58147682 | 3.267836138 | 0.001083731 | 0.0380612 |
| Glt8d2            | 91.81272225    | 1.8777454 | 0.61172679 | 3.069581829 | 0.002143587 | 0.0608893 |
| Wnt9a             | 170.7431089    | 1.8731827 | 0.59653113 | 3.140125656 | 0.001688754 | 0.0516217 |
| Neurod6           | 565.3212568    | 1.8621682 | 0.31584852 | 5.895763593 | 3.73E-09    | 1.58E-06  |
| Scube1            | 357.1724709    | 1.857907  | 0.5014941  | 3.704743508 | 0.000211605 | 0.0120071 |
| Cplx3             | 320.3250001    | 1.8357945 | 0.51703638 | 3.550609873 | 0.00038434  | 0.0182129 |
| Ipcef1            | 1141.520206    | 1.8229529 | 0.36983935 | 4.929039942 | 8.26E-07    | 0.0001554 |
| Trabd2b           | 55.48203132    | 1.8086157 | 0.58763025 | 3.077812495 | 0.002085261 | 0.0599723 |
| Prss12            | 243.4998377    | 1.8079994 | 0.31046661 | 5.823490791 | 5.76E-09    | 2.25E-06  |
| Rtn4rl2           | 239.8930932    | 1.8053229 | 0.45015301 | 4.01046495  | 6.06E-05    | 0.0049195 |
| Itga8             | 61.23145621    | 1.798886  | 0.62149074 | 2.894469596 | 0.003797997 | 0.0894185 |

|                  |             |           |             |              |           |           |                |             |           |            |             |             |           |
|------------------|-------------|-----------|-------------|--------------|-----------|-----------|----------------|-------------|-----------|------------|-------------|-------------|-----------|
| <b>Rem2</b>      | 919.1096817 | -1.266386 | 0.273291621 | -4.633826069 | 3.59E-06  | 0.0005128 | <b>Wnt10a</b>  | 81.33880471 | 1.7957269 | 0.46285881 | 3.879642933 | 0.00010461  | 0.0071617 |
| <b>Soat1</b>     | 685.2675299 | -1.259172 | 0.308876403 | -4.076620989 | 4.57E-05  | 0.0039014 | <b>Rpl17</b>   | 433.3812855 | 1.7774373 | 0.39459104 | 4.504504965 | 6.65E-06    | 0.0008376 |
| <b>Baiap3</b>    | 279.4396373 | -1.221092 | 0.359229979 | -3.399194284 | 0.0006758 | 0.0269679 | <b>Kcnj6</b>   | 134.8446486 | 1.7749424 | 0.48640559 | 3.649099513 | 0.000263161 | 0.0139626 |
| <b>Junb</b>      | 1594.717067 | -1.211106 | 0.295923418 | -4.092632288 | 4.27E-05  | 0.0037053 | <b>Ccn3</b>    | 465.6765461 | 1.6964004 | 0.35311338 | 4.80412388  | 1.55E-06    | 0.0002624 |
| <b>N4bp2</b>     | 231.6855643 | -1.205439 | 0.404707824 | -2.978541409 | 0.0028962 | 0.0749591 | <b>Cacna1g</b> | 814.8240227 | 1.6933859 | 0.27881552 | 6.073499233 | 1.25E-09    | 6.89E-07  |
| <b>Gpr101</b>    | 123.3069286 | -1.203779 | 0.379634929 | -3.170885013 | 0.0015198 | 0.0479351 | <b>Cfap100</b> | 75.73018607 | 1.687082  | 0.5563693  | 3.032306161 | 0.002426929 | 0.0663986 |
| <b>Cobll1</b>    | 303.7857625 | -1.187098 | 0.275121976 | -4.314806212 | 1.60E-05  | 0.0016366 | <b>Cnih3</b>   | 734.6161267 | 1.6817732 | 0.39423698 | 4.265894112 | 1.99E-05    | 0.0019589 |
| <b>Klf4</b>      | 116.1728548 | -1.183569 | 0.400764476 | -2.953278622 | 0.0031442 | 0.0788303 | <b>Medag</b>   | 263.7274886 | 1.6795389 | 0.44003581 | 3.816823123 | 0.000135181 | 0.0085457 |
| <b>Ciart</b>     | 355.6693068 | -1.18319  | 0.351343004 | -3.36762006  | 0.0007582 | 0.0289705 | <b>Gfra2</b>   | 702.8954727 | 1.6664297 | 0.36823483 | 4.525453786 | 6.03E-06    | 0.0007785 |
| <b>Rpl10-ps1</b> | 895.8486918 | -1.182709 | 0.386759764 | -3.057994639 | 0.0022282 | 0.0625759 | <b>C1qj3</b>   | 437.2490212 | 1.6586406 | 0.2986891  | 5.553067106 | 2.81E-08    | 8.51E-06  |
| <b>Nr4a3</b>     | 831.81361   | -1.180273 | 0.374435684 | -3.15213793  | 0.0016208 | 0.0500594 | <b>Pdzrn3</b>  | 310.8140862 | 1.6527259 | 0.41875512 | 3.946759792 | 7.92E-05    | 0.0058788 |
| <b>Rasgrp2</b>   | 3936.764022 | -1.163039 | 0.19263825  | -6.037424806 | 1.57E-09  | 8.02E-07  | <b>Galnt9</b>  | 812.5892275 | 1.6459065 | 0.38543302 | 4.27027892  | 1.95E-05    | 0.0019335 |
| <b>Tiparp</b>    | 587.5268487 | -1.155575 | 0.31634595  | -3.652884535 | 0.0002593 | 0.0139052 | <b>Cbln2</b>   | 254.1057064 | 1.6359832 | 0.38195062 | 4.283232143 | 1.84E-05    | 0.0018365 |
| <b>Plekha1</b>   | 2350.44051  | -1.144839 | 0.283828311 | -4.033561385 | 5.49E-05  | 0.0045851 | <b>Zbtb37</b>  | 431.0688199 | 1.63551   | 0.270791   | 6.039750082 | 1.54E-09    | 8.02E-07  |
| <b>Zbtb20</b>    | 1797.422866 | -1.134103 | 0.247614139 | -4.580122282 | 4.65E-06  | 0.000627  | <b>Pde5a</b>   | 145.1080454 | 1.5805509 | 0.39754579 | 3.975770702 | 7.02E-05    | 0.0054564 |
| <b>Abhd11os</b>  | 170.2708343 | -1.121169 | 0.32547333  | -3.444735067 | 0.0005716 | 0.0239886 | <b>Nxph3</b>   | 364.1006907 | 1.5607985 | 0.27842852 | 5.60574239  | 2.07E-08    | 6.55E-06  |
| <b>Fosb</b>      | 393.3881123 | -1.120501 | 0.312991429 | -3.579972953 | 0.0003436 | 0.0171308 | <b>Bdnf</b>    | 203.3273386 | 1.5397973 | 0.40457714 | 3.805942375 | 0.000141265 | 0.0087443 |
| <b>Dlk1</b>      | 208.8423726 | -1.120421 | 0.374154082 | -2.99454499  | 0.0027485 | 0.0725264 | <b>Mical2</b>  | 3688.349722 | 1.5336116 | 0.22312888 | 6.873209986 | 6.28E-12    | 5.83E-09  |
| <b>Krt9</b>      | 512.410962  | -1.112487 | 0.295370022 | -3.766419508 | 0.0001656 | 0.0099352 | <b>Dtl</b>     | 87.14610102 | 1.497002  | 0.46822509 | 3.197184516 | 0.001387761 | 0.045411  |
| <b>Rnf207</b>    | 233.8106984 | -1.104237 | 0.308999407 | -3.57358979  | 0.0003521 | 0.0173345 | <b>Car4</b>    | 328.5812015 | 1.4938781 | 0.36051784 | 4.143700924 | 3.42E-05    | 0.0031147 |
| <b>Arhgap27</b>  | 662.1238689 | -1.09211  | 0.30622401  | -3.566377524 | 0.000362  | 0.0175723 | <b>Pter</b>    | 773.9207436 | 1.4912462 | 0.27390905 | 5.444311778 | 5.20E-08    | 1.43E-05  |
| <b>Rnf169</b>    | 864.5000564 | -1.090165 | 0.188213711 | -5.792167038 | 6.95E-09  | 2.55E-06  | <b>Nptxr</b>   | 6561.775327 | 1.4660293 | 0.27212978 | 5.387243026 | 7.15E-08    | 1.90E-05  |
| <b>Id3</b>       | 506.8664264 | -1.087907 | 0.320499204 | -3.394415135 | 0.0006878 | 0.0271736 | <b>Mapk11</b>  | 440.1976115 | 1.4532336 | 0.33384717 | 4.35299049  | 1.34E-05    | 0.0014149 |
| <b>Prrg1</b>     | 201.0972161 | -1.077406 | 0.373025059 | -2.888294028 | 0.0038734 | 0.0903342 | <b>Oxtr</b>    | 65.98594372 | 1.4506364 | 0.50404471 | 2.877991502 | 0.004002159 | 0.0917532 |
| <b>Actn2</b>     | 1909.082982 | -1.075441 | 0.206168232 | -5.216327214 | 1.83E-07  | 4.24E-05  | <b>Cux2</b>    | 697.0628782 | 1.4470256 | 0.37858339 | 3.822211056 | 0.00013226  | 0.0084329 |
| <b>Crf3</b>      | 287.7537301 | -1.075434 | 0.282541794 | -3.806282809 | 0.0001411 | 0.0087443 | <b>Tuba8</b>   | 137.6287231 | 1.4447639 | 0.41037285 | 3.520612849 | 0.000430551 | 0.0198027 |
| <b>Fos</b>       | 365.2555633 | -1.072119 | 0.333097652 | -3.218633408 | 0.001288  | 0.0431847 | <b>Olfm1</b>   | 8233.113239 | 1.4375827 | 0.26686882 | 5.386851442 | 7.17E-08    | 1.90E-05  |
| <b>Rpl2211</b>   | 560.0749056 | -1.066078 | 0.268073667 | -3.976811194 | 6.98E-05  | 0.0054564 | <b>Lrfn2</b>   | 216.0363917 | 1.4335228 | 0.3485416  | 4.112917455 | 3.91E-05    | 0.0034611 |
| <b>Unc13c</b>    | 3573.792053 | -1.05649  | 0.187176611 | -5.64434829  | 1.66E-08  | 5.35E-06  | <b>Bmp3</b>    | 179.0094319 | 1.432122  | 0.3802722  | 3.766044376 | 0.000165854 | 0.0099352 |
| <b>Flna</b>      | 1705.745403 | -1.046399 | 0.20051898  | -5.21845343  | 1.80E-07  | 4.24E-05  | <b>Bag2</b>    | 100.2204161 | 1.4311849 | 0.44367361 | 3.225760659 | 0.001256384 | 0.0424201 |
| <b>Pard3</b>     | 981.9393925 | -1.044298 | 0.217248042 | -4.806936979 | 1.53E-06  | 0.0002617 | <b>Rspo2</b>   | 118.4452059 | 1.4201432 | 0.41794055 | 3.397954924 | 0.000678916 | 0.0269679 |
| <b>Mrpl48</b>    | 920.4804927 | -1.026479 | 0.205823029 | -4.987191085 | 6.13E-07  | 0.0001198 | <b>Syt13</b>   | 2474.149385 | 1.3679773 | 0.31790999 | 4.303033414 | 1.68E-05    | 0.0016911 |
| <b>St8sia2</b>   | 251.4513706 | -1.005189 | 0.308872237 | -3.254383466 | 0.0011364 | 0.0391698 | <b>Ccn2</b>    | 587.8929461 | 1.3489091 | 0.29276919 | 4.607414747 | 4.08E-06    | 0.000564  |
| <b>Nab2</b>      | 840.0560451 | -1.001889 | 0.218828678 | -4.578416424 | 4.69E-06  | 0.000627  | <b>Tmem178</b> | 669.1903567 | 1.347111  | 0.40006545 | 3.367226549 | 0.000759283 | 0.0289705 |
| <b>Kcnh4</b>     | 808.1907875 | -0.999947 | 0.192959113 | -5.182168251 | 2.19E-07  | 4.94E-05  | <b>Relt</b>    | 282.1854217 | 1.3471107 | 0.37302967 | 3.611269469 | 0.000304702 | 0.0156632 |
| <b>Arl4d</b>     | 799.0975031 | -0.996055 | 0.290803149 | -3.425185189 | 0.0006144 | 0.0253601 | <b>Ccdc3</b>   | 118.2965967 | 1.3468864 | 0.4049417  | 3.32612419  | 0.000880627 | 0.0325438 |
| <b>Gcnt2</b>     | 1834.997854 | -0.994984 | 0.186359929 | -5.339043516 | 9.34E-08  | 2.33E-05  | <b>Adra1b</b>  | 162.0535624 | 1.3454561 | 0.46600318 | 2.887225079 | 0.003886561 | 0.0904996 |
| <b>Rgs2</b>      | 2425.465417 | -0.994854 | 0.225782214 | -4.406253114 | 1.05E-05  | 0.0011927 | <b>Nxph4</b>   | 97.98116502 | 1.3343353 | 0.44086381 | 3.026638299 | 0.002472897 | 0.0672845 |
| <b>Slc5a7</b>    | 699.5674931 | -0.986523 | 0.250208192 | -3.942807297 | 8.05E-05  | 0.0058788 | <b>Nptx1</b>   | 3719.171582 | 1.3247036 | 0.28985029 | 4.570302924 | 4.87E-06    | 0.000646  |
| <b>Fosl2</b>     | 913.2521027 | -0.983949 | 0.340964288 | -2.885782075 | 0.0039044 | 0.0906269 | <b>Zbtb16</b>  | 190.4999555 | 1.3212517 | 0.37730548 | 3.501808968 | 0.000462111 | 0.0206781 |
| <b>Dcun1d3</b>   | 388.7603797 | -0.977677 | 0.281060402 | -3.478528783 | 0.0005042 | 0.0220295 | <b>Fst</b>     | 164.6026568 | 1.317999  | 0.35190207 | 3.745357257 | 0.000180137 | 0.0105182 |
| <b>Tchp</b>      | 223.0761832 | -0.967201 | 0.292943932 | -3.301658318 | 0.0009612 | 0.0345735 | <b>Ptpn3</b>   | 472.9036516 | 1.317881  | 0.39068274 | 3.373276747 | 0.000742793 | 0.0287368 |
| <b>Adgre5</b>    | 221.4854319 | -0.966823 | 0.323026373 | -2.993014545 | 0.0027624 | 0.0727619 | <b>Kcnc4</b>   | 637.0696663 | 1.3150926 | 0.36855192 | 3.568269713 | 0.000359346 | 0.0175554 |
| <b>Ido1</b>      | 358.8411948 | -0.965279 | 0.28549168  | -3.381110622 | 0.0007219 | 0.0282456 | <b>Sema6c</b>  | 272.8717171 | 1.3137425 | 0.44450249 | 2.955534691 | 0.003121276 | 0.0784772 |
| <b>Svil</b>      | 323.3658459 | -0.960553 | 0.255757137 | -3.7557232   | 0.0001728 | 0.01023   | <b>Ak5</b>     | 1563.544926 | 1.3100018 | 0.27058531 | 4.841363461 | 1.29E-06    | 0.0002281 |
| <b>Rnpc3</b>     | 522.1988468 | -0.943865 | 0.295422432 | -3.19496812  | 0.0013985 | 0.045646  | <b>Fam81a</b>  | 2053.614345 | 1.3065094 | 0.27093797 | 4.822171678 | 1.42E-06    | 0.0002482 |
| <b>Sgk1</b>      | 3364.293141 | -0.929249 | 0.283347304 | -3.279542222 | 0.0010398 | 0.0367777 | <b>Fkbp1b</b>  | 238.2494771 | 1.2943929 | 0.39519982 | 3.275287092 | 0.001055546 | 0.0371592 |
| <b>Ice2</b>      | 182.5675311 | -0.925227 | 0.315973677 | -2.928177797 | 0.0034096 | 0.0831729 | <b>Rprm</b>    | 400.2048742 | 1.2940137 | 0.43103625 | 3.002099488 | 0.002681245 | 0.0716413 |

|                  |             |           |             |              |           |           |                 |             |           |            |             |             |           |
|------------------|-------------|-----------|-------------|--------------|-----------|-----------|-----------------|-------------|-----------|------------|-------------|-------------|-----------|
| <b>Sh2b3</b>     | 542.2713616 | -0.920826 | 0.210248795 | -4.37969843  | 1.19E-05  | 0.0012887 | <b>Pafah2</b>   | 127.6936797 | 1.2939353 | 0.37938416 | 3.41062013  | 0.000648153 | 0.0264532 |
| <b>Rarb</b>      | 1645.37905  | -0.918824 | 0.241803559 | -3.799877634 | 0.0001448 | 0.0088871 | <b>Stx1a</b>    | 2020.370326 | 1.2837879 | 0.33673441 | 3.812464246 | 0.000137588 | 0.0086429 |
| <b>Nof8</b>      | 622.5805245 | -0.911064 | 0.300512736 | -3.0316989   | 0.0024318 | 0.06641   | <b>Unc5d</b>    | 417.005264  | 1.2811316 | 0.39920364 | 3.209218126 | 0.001330965 | 0.0440374 |
| <b>Chat</b>      | 431.5039934 | -0.910044 | 0.232408434 | -3.915707796 | 9.01E-05  | 0.0065005 | <b>Lsm11</b>    | 283.0932071 | 1.2762244 | 0.38135714 | 3.34653325  | 0.000818289 | 0.0309326 |
| <b>Fam241a</b>   | 195.7349711 | -0.905906 | 0.319289188 | -2.837259483 | 0.0045503 | 0.0996582 | <b>St8sia5</b>  | 582.093361  | 1.2737776 | 0.33068461 | 3.851941073 | 0.000117185 | 0.0076933 |
| <b>Pign</b>      | 402.8372281 | -0.89749  | 0.238665626 | -3.760450431 | 0.0001696 | 0.0100788 | <b>Sowahb</b>   | 216.5973395 | 1.2707674 | 0.41745164 | 3.044106837 | 0.002333722 | 0.0648033 |
| <b>Lmo2</b>      | 907.6837207 | -0.897076 | 0.20215557  | -4.437552674 | 9.10E-06  | 0.0010728 | <b>Fah</b>      | 468.8811649 | 1.2676314 | 0.24975055 | 5.075590111 | 3.86E-07    | 8.08E-05  |
| <b>Clk1</b>      | 2920.040509 | -0.891518 | 0.267612454 | -3.331378835 | 0.0008642 | 0.0320152 | <b>Satb1</b>    | 1298.153295 | 1.2455023 | 0.34273436 | 3.634016551 | 0.000279043 | 0.0145455 |
| <b>Rpn2</b>      | 2683.000537 | -0.882881 | 0.178420122 | -4.948326628 | 7.49E-07  | 0.0001426 | <b>Nectin3</b>  | 340.6036164 | 1.2420155 | 0.38100388 | 3.259850116 | 0.001114711 | 0.0387825 |
| <b>lsyna1</b>    | 950.9164658 | -0.879924 | 0.22142595  | -3.973897891 | 7.07E-05  | 0.0054709 | <b>Zfp7</b>     | 145.1354501 | 1.2386621 | 0.37543665 | 3.29925741  | 0.00096941  | 0.0346174 |
| <b>Lrrc10b</b>   | 5345.966673 | -0.877165 | 0.245519379 | -3.572691565 | 0.0003533 | 0.0173345 | <b>Gabbr2</b>   | 4050.683614 | 1.236849  | 0.27297838 | 4.530941174 | 5.87E-06    | 0.000772  |
| <b>Rxrg</b>      | 2285.040853 | -0.877029 | 0.286518602 | -3.060983488 | 0.0022061 | 0.062072  | <b>Syt17</b>    | 276.124775  | 1.23661   | 0.33380731 | 3.704562286 | 0.000211756 | 0.0120071 |
| <b>Amy1</b>      | 359.4375884 | -0.868366 | 0.302979093 | -2.866093243 | 0.0041557 | 0.0939568 | <b>Mpped1</b>   | 2401.977908 | 1.2311569 | 0.22547588 | 5.460259852 | 4.75E-08    | 1.34E-05  |
| <b>Zfp276</b>    | 504.1487419 | -0.855686 | 0.25335531  | -3.377413326 | 0.0007317 | 0.0284562 | <b>Trp53i11</b> | 874.7906614 | 1.231117  | 0.19373272 | 6.35471918  | 2.09E-10    | 1.35E-07  |
| <b>Zc3h12c</b>   | 421.2890329 | -0.854281 | 0.258033282 | -3.310741259 | 0.0009305 | 0.033798  | <b>Chrna4</b>   | 601.7151303 | 1.2309176 | 0.26104427 | 4.715359531 | 2.41E-06    | 0.0003731 |
| <b>Cacna1h</b>   | 2017.745116 | -0.852767 | 0.159625694 | -5.34229437  | 9.18E-08  | 2.33E-05  | <b>Fezf2</b>    | 248.000773  | 1.2284661 | 0.39881206 | 3.080313222 | 0.00206783  | 0.0597272 |
| <b>Slc10a4</b>   | 332.4514897 | -0.845867 | 0.274579563 | -3.08059144  | 0.0020659 | 0.0597272 | <b>Shank1</b>   | 4013.176659 | 1.2248921 | 0.23505011 | 5.21119558  | 1.88E-07    | 4.29E-05  |
| <b>Per1</b>      | 2306.436439 | -0.835847 | 0.163923062 | -5.09902061  | 3.41E-07  | 7.25E-05  | <b>Ccdc120</b>  | 197.4279328 | 1.2225014 | 0.39553927 | 3.09072064  | 0.001996714 | 0.0585073 |
| <b>Fam184b</b>   | 462.7800331 | -0.834232 | 0.274455678 | -3.039588166 | 0.002369  | 0.0655353 | <b>Cckbr</b>    | 397.85726   | 1.222062  | 0.34315098 | 3.561295334 | 0.00036903  | 0.0177997 |
| <b>Dnajc1</b>    | 514.9679179 | -0.829778 | 0.248035257 | -3.345405104 | 0.0008216 | 0.0309798 | <b>Tmem132d</b> | 564.6574152 | 1.2155505 | 0.34344159 | 3.539322496 | 0.000401155 | 0.0187717 |
| <b>Grb10</b>     | 976.1692671 | -0.827122 | 0.277014806 | -2.98583893  | 0.002828  | 0.0735779 | <b>Olfm2</b>    | 1171.83903  | 1.2115545 | 0.35477775 | 3.414967485 | 0.000637896 | 0.0261784 |
| <b>Drd1</b>      | 4597.265595 | -0.825979 | 0.185641929 | -4.44931097  | 8.61E-06  | 0.0010238 | <b>Rpl23a</b>   | 910.5950333 | 1.2105546 | 0.23990811 | 5.045909654 | 4.51E-07    | 9.31E-05  |
| <b>Tpm1</b>      | 5889.561583 | -0.825437 | 0.226978466 | -3.636629853 | 0.0002762 | 0.0145431 | <b>Adgra1</b>   | 632.8687975 | 1.208132  | 0.26770891 | 4.512856714 | 6.40E-06    | 0.0008121 |
| <b>Dbp</b>       | 3533.927983 | -0.825097 | 0.187023959 | -4.411717722 | 1.03E-05  | 0.001178  | <b>Vsnl1</b>    | 5499.953508 | 1.1995912 | 0.3250326  | 3.690679692 | 0.000223656 | 0.0124911 |
| <b>Flnb</b>      | 941.1924193 | -0.822611 | 0.245453927 | -3.351387721 | 0.0008041 | 0.0304729 | <b>Ncald</b>    | 5754.768234 | 1.1899023 | 0.31774839 | 3.744794142 | 0.000180542 | 0.0105182 |
| <b>Slc17a8</b>   | 319.4345436 | -0.821447 | 0.289344587 | -2.838991024 | 0.0045256 | 0.0996582 | <b>Sphkap</b>   | 1484.24865  | 1.1894522 | 0.32210152 | 3.692786858 | 0.00022181  | 0.0124347 |
| <b>Bhlhe41</b>   | 1197.230487 | -0.8211   | 0.188466652 | -4.356737226 | 1.32E-05  | 0.0014009 | <b>Kcnj16</b>   | 374.3816864 | 1.1867751 | 0.3005978  | 3.948049812 | 7.88E-05    | 0.0058788 |
| <b>Clk4</b>      | 1469.267559 | -0.813301 | 0.27630439  | -2.943495173 | 0.0032453 | 0.0800732 | <b>Pcsk5</b>    | 119.8914639 | 1.1863675 | 0.38562757 | 3.076459357 | 0.002094749 | 0.0600183 |
| <b>Scn3a</b>     | 1340.769115 | -0.804909 | 0.231861893 | -3.471502554 | 0.0005176 | 0.0224163 | <b>Crb2</b>     | 137.9216577 | 1.1859859 | 0.39071519 | 3.035423122 | 0.002401985 | 0.0658374 |
| <b>Slc25a25</b>  | 1581.507141 | -0.804142 | 0.183130536 | -4.391087042 | 1.13E-05  | 0.0012504 | <b>Gng4</b>     | 672.5231188 | 1.1787025 | 0.33307147 | 3.538887538 | 0.000401817 | 0.0187717 |
| <b>Serpinb1a</b> | 310.676419  | -0.801399 | 0.273521476 | -2.929930236 | 0.0033904 | 0.0828413 | <b>Golga7b</b>  | 1516.263807 | 1.1731667 | 0.25469107 | 4.606234072 | 4.10E-06    | 0.000564  |
| <b>Cxadr</b>     | 609.3598815 | -0.801121 | 0.219408737 | -3.651271216 | 0.0002609 | 0.0139052 | <b>Boc</b>      | 174.9406367 | 1.1677701 | 0.40112806 | 2.911215062 | 0.003600261 | 0.0866864 |
| <b>Anapc7</b>    | 679.5084974 | -0.800299 | 0.211115443 | -3.790812271 | 0.0001502 | 0.0091799 | <b>Slitrk1</b>  | 1027.946439 | 1.1583162 | 0.34222667 | 3.384646236 | 0.0007127   | 0.0280846 |
| <b>mt-Atp8</b>   | 91030.01301 | -0.79458  | 0.134083976 | -5.92598978  | 3.10E-09  | 1.44E-06  | <b>Nr2f1</b>    | 728.677164  | 1.1490076 | 0.37351853 | 3.076173045 | 0.002096761 | 0.0600183 |
| <b>Cd4</b>       | 1381.961948 | -0.7921   | 0.209464585 | -3.781547759 | 0.0001559 | 0.0094506 | <b>Zdhhc22</b>  | 550.8510457 | 1.1475903 | 0.29599779 | 3.877023014 | 0.000105742 | 0.0071731 |
| <b>Hlcs</b>      | 396.5823861 | -0.787719 | 0.236434132 | -3.331664277 | 0.0008633 | 0.0320152 | <b>Coro2a</b>   | 405.9647289 | 1.1438964 | 0.327445   | 3.493400249 | 0.000476911 | 0.0212682 |
| <b>Egr1</b>      | 7081.129901 | -0.785498 | 0.190863517 | -4.115497357 | 3.86E-05  | 0.0034611 | <b>Sstr2</b>    | 355.2684811 | 1.1376805 | 0.31845249 | 3.572528141 | 0.000353551 | 0.0173345 |
| <b>Ddit4l</b>    | 598.6972096 | -0.785337 | 0.254306602 | -3.088149051 | 0.0020141 | 0.0588998 | <b>Rps29</b>    | 909.2995026 | 1.1302194 | 0.21627584 | 5.225823825 | 1.73E-07    | 4.15E-05  |
| <b>Ccdc187</b>   | 583.2519508 | -0.784783 | 0.232939739 | -3.369039098 | 0.0007543 | 0.028956  | <b>Nfix</b>     | 2630.961808 | 1.1296548 | 0.26964192 | 4.189462804 | 2.80E-05    | 0.0026126 |
| <b>Kcna4</b>     | 1260.996273 | -0.783914 | 0.186502357 | -4.203236865 | 2.63E-05  | 0.0025058 | <b>Pde1a</b>    | 1893.995877 | 1.1235785 | 0.24246515 | 4.633979507 | 3.59E-06    | 0.0005128 |
| <b>Stxbp2</b>    | 860.906844  | -0.780004 | 0.231453234 | -3.37002988  | 0.0007516 | 0.0289269 | <b>Stac2</b>    | 1411.82806  | 1.1215463 | 0.35123329 | 3.193166396 | 0.001407218 | 0.0457454 |
| <b>Plekha6</b>   | 2237.088492 | -0.777997 | 0.203411269 | -3.824751018 | 0.0001309 | 0.0083824 | <b>Grik4</b>    | 322.7630934 | 1.1136173 | 0.34408252 | 3.236483259 | 0.001210123 | 0.041423  |
| <b>Arpp21</b>    | 25339.35434 | -0.773719 | 0.225939956 | -3.424443671 | 0.0006161 | 0.0253601 | <b>Sel1l3</b>   | 741.378788  | 1.1124569 | 0.35050339 | 3.173883463 | 0.001504141 | 0.0476352 |
| <b>Gprin3</b>    | 1058.636802 | -0.771686 | 0.21434255  | -3.600246592 | 0.0003179 | 0.01601   | <b>Disp3</b>    | 390.2301936 | 1.103195  | 0.28226351 | 3.908387044 | 9.29E-05    | 0.0066045 |
| <b>Reln</b>      | 2134.026012 | -0.771517 | 0.260406439 | -2.962743005 | 0.0030491 | 0.0775644 | <b>B3galt2</b>  | 634.507636  | 1.0992941 | 0.29767161 | 3.692975822 | 0.000221645 | 0.0124347 |
| <b>Scn4b</b>     | 26940.9743  | -0.771366 | 0.164286295 | -4.69525563  | 2.66E-06  | 0.0004036 | <b>Kcnj3</b>    | 1348.866529 | 1.0903215 | 0.38106389 | 2.861256481 | 0.004219655 | 0.0948369 |
| <b>Dgkb</b>      | 8413.271375 | -0.766088 | 0.211159041 | -3.628014701 | 0.0002856 | 0.014784  | <b>Fxyd7</b>    | 524.1458476 | 1.0854456 | 0.2866902  | 3.786127335 | 0.000153013 | 0.0093163 |
| <b>Ano2</b>      | 537.4359896 | -0.765463 | 0.216404816 | -3.537180665 | 0.0004044 | 0.0187753 | <b>Fhd2</b>     | 2798.353822 | 1.0818534 | 0.26381618 | 4.100784635 | 4.12E-05    | 0.0036031 |

|                 |             |           |             |              |           |           |                 |             |           |            |             |             |           |
|-----------------|-------------|-----------|-------------|--------------|-----------|-----------|-----------------|-------------|-----------|------------|-------------|-------------|-----------|
| <b>Cdc42ep3</b> | 626.9635923 | -0.764151 | 0.257616186 | -2.966239683 | 0.0030147 | 0.0769514 | <b>Hs3st2</b>   | 680.3856766 | 1.0801797 | 0.29556627 | 3.654610968 | 0.000257572 | 0.0138641 |
| <b>Cd46</b>     | 607.557035  | -0.763612 | 0.234004877 | -3.263233075 | 0.0011015 | 0.0384125 | <b>Slc18b1</b>  | 368.9948548 | 1.079639  | 0.31730548 | 3.402522375 | 0.000667669 | 0.0269679 |
| <b>Tnrc6b</b>   | 1370.736977 | -0.757375 | 0.256964353 | -2.947393731 | 0.0032046 | 0.0797458 | <b>Sez6l</b>    | 1808.944502 | 1.076292  | 0.33439797 | 3.218596054 | 0.001288198 | 0.0431847 |
| <b>Traip</b>    | 673.2487594 | -0.751165 | 0.217427422 | -3.454783192 | 0.0005507 | 0.0235107 | <b>Serpini1</b> | 2971.700407 | 1.0710134 | 0.30411138 | 3.521780063 | 0.00042866  | 0.0197769 |
| <b>Tctn1</b>    | 652.6172749 | -0.749416 | 0.240046573 | -3.12196108  | 0.0017965 | 0.0540526 | <b>Fam19a2</b>  | 406.8139867 | 1.068541  | 0.34752319 | 3.074732964 | 0.002106911 | 0.0601928 |
| <b>Pigq</b>     | 1846.729333 | -0.748945 | 0.168070012 | -4.456147065 | 8.34E-06  | 0.0009997 | <b>Slc6a7</b>   | 639.2446564 | 1.0659044 | 0.2981838  | 3.574655607 | 0.000350689 | 0.0173345 |
| <b>Aktip</b>    | 2565.030762 | -0.747269 | 0.231082803 | -3.23376946  | 0.0012217 | 0.0416268 | <b>Chrm3</b>    | 573.9069233 | 1.0537006 | 0.2812642  | 3.746302032 | 0.000179461 | 0.0105182 |
| <b>Suz12</b>    | 882.8076821 | -0.746458 | 0.210004314 | -3.554488922 | 0.0003787 | 0.0180326 | <b>Cd34</b>     | 833.7185128 | 1.0516972 | 0.33396047 | 3.149166791 | 0.001637367 | 0.0503618 |
| <b>Rgs9</b>     | 8347.341181 | -0.744625 | 0.206246635 | -3.610361317 | 0.0003058 | 0.0156639 | <b>Rai14</b>    | 200.4367545 | 1.0469058 | 0.36659063 | 2.855789898 | 0.004292991 | 0.0963394 |
| <b>Acvr1c</b>   | 1330.978476 | -0.740669 | 0.192295685 | -3.851721417 | 0.0001173 | 0.0076933 | <b>Tanc1</b>    | 597.7948524 | 1.0457913 | 0.34661379 | 3.0171166   | 0.0025515   | 0.0690439 |
| <b>Pfas</b>     | 462.3071311 | -0.739189 | 0.260525606 | -2.837297611 | 0.0045497 | 0.0996582 | <b>Ndst3</b>    | 208.1501437 | 1.0317532 | 0.33283123 | 3.099929023 | 0.00193567  | 0.0573429 |
| <b>Id4</b>      | 4319.355288 | -0.739053 | 0.151881047 | -4.86599913  | 1.14E-06  | 0.0002063 | <b>Ak4</b>      | 524.1205479 | 1.0309487 | 0.22261384 | 4.631107731 | 3.64E-06    | 0.0005146 |
| <b>Celsr3</b>   | 1417.353288 | -0.737092 | 0.188984382 | -3.900278394 | 9.61E-05  | 0.006733  | <b>Ank1</b>     | 1001.304858 | 1.0287663 | 0.28930608 | 3.555978723 | 0.000376575 | 0.0180326 |
| <b>Atp6v0a2</b> | 1856.261897 | -0.735663 | 0.222926913 | -3.300017398 | 0.0009668 | 0.0346174 | <b>Rnase1</b>   | 149.1951559 | 1.0283024 | 0.35572015 | 2.89076246  | 0.003843085 | 0.0899347 |
| <b>Agfg2</b>    | 1119.131502 | -0.732588 | 0.189077447 | -3.874538176 | 0.0001068 | 0.0072137 | <b>Gprin1</b>   | 1189.89355  | 1.0257347 | 0.23416476 | 4.380397433 | 1.18E-05    | 0.0012887 |
| <b>Frmf4b</b>   | 893.0658954 | -0.727074 | 0.221901171 | -3.276565238 | 0.0010508 | 0.0370793 | <b>Arhgef25</b> | 1769.695747 | 1.0150554 | 0.2333748  | 4.349464639 | 1.36E-05    | 0.0014178 |
| <b>Rrp1b</b>    | 400.6993132 | -0.726424 | 0.246035422 | -2.952517974 | 0.0031519 | 0.0788303 | <b>Unc13b</b>   | 511.5853964 | 1.0136361 | 0.21373708 | 4.742443553 | 2.11E-06    | 0.0003388 |
| <b>Adgrf5</b>   | 840.339897  | -0.722161 | 0.206762871 | -3.492700176 | 0.0004782 | 0.0212682 | <b>Lingo1</b>   | 3725.618694 | 1.0134609 | 0.28353742 | 3.574346231 | 0.000351104 | 0.0173345 |
| <b>Fras1</b>    | 728.453312  | -0.720297 | 0.224343797 | -3.210682043 | 0.0013242 | 0.0439115 | <b>Wnt4</b>     | 241.657262  | 1.0116059 | 0.32403647 | 3.121888901 | 0.001796947 | 0.0540526 |
| <b>Zeb1</b>     | 2113.898047 | -0.719731 | 0.171355849 | -4.200211989 | 2.67E-05  | 0.0025233 | <b>Fxyd6</b>    | 860.000222  | 1.0067659 | 0.21645145 | 4.651231931 | 3.30E-06    | 0.0004902 |
| <b>Ndufa3</b>   | 835.8412508 | -0.719476 | 0.186413567 | -3.859571208 | 0.0001136 | 0.0076011 | <b>Hrh1</b>     | 174.3276249 | 1.0036826 | 0.3457685  | 2.902758796 | 0.003698914 | 0.0883458 |
| <b>Pbx3</b>     | 1073.562951 | -0.718516 | 0.242496821 | -2.962989822 | 0.0030467 | 0.0775644 | <b>Kcnj9</b>    | 1696.95976  | 1.0004493 | 0.30170629 | 3.315970911 | 0.000913253 | 0.0334017 |
| <b>Cc2d1b</b>   | 606.1896195 | -0.716544 | 0.210744575 | -3.400059676 | 0.0006737 | 0.0269679 | <b>Ptprk</b>    | 684.0693408 | 1.0001591 | 0.28035382 | 3.567488781 | 0.000360419 | 0.0175554 |
| <b>Fbxl16</b>   | 37262.46892 | -0.714676 | 0.145664235 | -4.906324806 | 9.28E-07  | 0.0001723 | <b>Skida1</b>   | 181.6241128 | 0.9971895 | 0.33107201 | 3.012001758 | 0.002595311 | 0.0698477 |
| <b>Tbc1d8</b>   | 2020.7631   | -0.714116 | 0.230886377 | -3.092931247 | 0.0019819 | 0.0583691 | <b>Gpd2</b>     | 1959.533522 | 0.9949373 | 0.31330711 | 3.175597694 | 0.001495282 | 0.0475299 |
| <b>Ccdc88c</b>  | 1994.987543 | -0.712951 | 0.250942904 | -2.841088022 | 0.004496  | 0.0992458 | <b>Fam155a</b>  | 1196.608128 | 0.9946974 | 0.27293306 | 3.644473848 | 0.000267939 | 0.0141655 |
| <b>Lbh</b>      | 825.8340003 | -0.70949  | 0.199557692 | -3.55531231  | 0.0003775 | 0.0180326 | <b>Mast4</b>    | 931.3585834 | 0.9941816 | 0.27023194 | 3.678993636 | 0.000234156 | 0.0129799 |
| <b>Rap1gap</b>  | 10192.59407 | -0.708897 | 0.191799491 | -3.696032002 | 0.000219  | 0.0123703 | <b>Cib2</b>     | 257.0371475 | 0.9887057 | 0.32806887 | 3.013713984 | 0.00258071  | 0.0697073 |
| <b>Mtcl1</b>    | 3040.10166  | -0.70542  | 0.148842893 | -4.739359939 | 2.14E-06  | 0.0003388 | <b>Mef2c</b>    | 5765.01711  | 0.9886622 | 0.30880019 | 3.201624214 | 0.001366551 | 0.044962  |
| <b>Ccnd2</b>    | 1746.351354 | -0.700793 | 0.176899601 | -3.961530712 | 7.45E-05  | 0.0055876 | <b>Mast1</b>    | 810.2858051 | 0.9882573 | 0.33395739 | 2.959231658 | 0.003084072 | 0.0780528 |
| <b>Sv2c</b>     | 2950.839111 | -0.696705 | 0.170462794 | -4.087135659 | 4.37E-05  | 0.0037503 | <b>Srrm4</b>    | 462.3585236 | 0.9880926 | 0.28444601 | 3.473743902 | 0.000513251 | 0.0222949 |
| <b>Tspyl2</b>   | 2161.044672 | -0.694494 | 0.154685756 | -4.489706113 | 7.13E-06  | 0.0008821 | <b>Sertm1</b>   | 238.0086959 | 0.9778038 | 0.34326945 | 2.848502157 | 0.004392556 | 0.0979817 |
| <b>Pcp4</b>     | 12455.10006 | -0.692506 | 0.173741946 | -3.985831053 | 6.72E-05  | 0.0053137 | <b>Foxp4</b>    | 577.4633222 | 0.9771978 | 0.21608811 | 4.522219034 | 6.12E-06    | 0.0007837 |
| <b>Akap9</b>    | 3773.260012 | -0.692065 | 0.239827431 | -2.885680261 | 0.0039057 | 0.0906269 | <b>Cpne6</b>    | 1072.786119 | 0.9743215 | 0.24204932 | 4.025301594 | 5.69E-05    | 0.0047226 |
| <b>Tmem267</b>  | 462.2202233 | -0.691387 | 0.230566537 | -2.998643333 | 0.0027118 | 0.0720169 | <b>Epop</b>     | 807.2940103 | 0.9729197 | 0.22172207 | 4.388014825 | 1.14E-05    | 0.0012588 |
| <b>Necab2</b>   | 3170.949018 | -0.691359 | 0.181512078 | -3.80888533  | 0.0001396 | 0.0087135 | <b>Synj2</b>    | 1127.127803 | 0.9723521 | 0.30534273 | 3.184461151 | 0.001450238 | 0.0469384 |
| <b>Ppp1r16b</b> | 6722.853167 | -0.691282 | 0.207232024 | -3.335788342 | 0.0008506 | 0.0318292 | <b>Rps13</b>    | 398.4812934 | 0.9720334 | 0.30613246 | 3.17520525  | 0.001497306 | 0.0475299 |
| <b>Ablim2</b>   | 5459.994512 | -0.690511 | 0.220886374 | -3.126093283 | 0.0017715 | 0.0535982 | <b>Agps</b>     | 890.5877593 | 0.9707817 | 0.29115421 | 3.334252664 | 0.000855289 | 0.0318451 |
| <b>Ankrd12</b>  | 1589.134285 | -0.690049 | 0.225702799 | -3.057336847 | 0.0022331 | 0.0625951 | <b>Basp1</b>    | 5851.599979 | 0.9565293 | 0.19310362 | 4.953450656 | 7.29E-07    | 0.0001407 |
| <b>Ppp1r1b</b>  | 33651.51189 | -0.688475 | 0.182450945 | -3.773480034 | 0.000161  | 0.009722  | <b>Smyd2</b>    | 516.8952901 | 0.9525979 | 0.309531   | 3.077552331 | 0.002087082 | 0.0599723 |
| <b>Rragd</b>    | 4459.498419 | -0.688427 | 0.211395518 | -3.256580517 | 0.0011276 | 0.0390014 | <b>Stmn1</b>    | 5140.651899 | 0.9464862 | 0.23264844 | 4.068311218 | 4.74E-05    | 0.00402   |
| <b>Dach1</b>    | 1252.115715 | -0.683216 | 0.170649499 | -4.003623358 | 6.24E-05  | 0.0049823 | <b>Ube2q11</b>  | 2297.8142   | 0.9378887 | 0.22616684 | 4.146888534 | 3.37E-05    | 0.0030906 |
| <b>Shb</b>      | 692.872406  | -0.681433 | 0.239578499 | -2.844301258 | 0.0044509 | 0.0986903 | <b>Myrip</b>    | 924.9489127 | 0.9335641 | 0.23026163 | 4.054362298 | 5.03E-05    | 0.0042434 |
| <b>Thsd7a</b>   | 1777.022511 | -0.680793 | 0.162428687 | -4.191337562 | 2.77E-05  | 0.0026075 | <b>Igf2</b>     | 846.5032687 | 0.9324378 | 0.28635181 | 3.256266415 | 0.001128878 | 0.0390014 |
| <b>Srrt</b>     | 2688.126991 | -0.674331 | 0.200046136 | -3.370876717 | 0.0007493 | 0.028913  | <b>Tmem42</b>   | 189.9903821 | 0.9314167 | 0.31461327 | 2.960513128 | 0.00307127  | 0.0778614 |
| <b>mt-Nd4l</b>  | 45790.07166 | -0.674152 | 0.14284243  | -4.719548133 | 2.36E-06  | 0.0003696 | <b>Ntn3</b>     | 186.2587473 | 0.9309854 | 0.32607633 | 2.855114853 | 0.004302127 | 0.0963431 |
| <b>Slc9a5</b>   | 1222.62655  | -0.670319 | 0.236294039 | -2.836801766 | 0.0045568 | 0.0996582 | <b>Sprn</b>     | 2133.896412 | 0.9292585 | 0.28889183 | 3.216631144 | 0.001297052 | 0.0432465 |
| <b>Selenoi</b>  | 1572.114882 | -0.657087 | 0.188703776 | -3.482108158 | 0.0004975 | 0.0218012 | <b>Ly6e</b>     | 2058.609341 | 0.9290666 | 0.21379438 | 4.34560834  | 1.39E-05    | 0.0014329 |



|                 |             |           |            |             |             |           |
|-----------------|-------------|-----------|------------|-------------|-------------|-----------|
| <b>Cpne4</b>    | 907.0555494 | 0.7498758 | 0.22488786 | 3.334443328 | 0.000854703 | 0.0318451 |
| <b>Faim2</b>    | 6617.065188 | 0.7416389 | 0.17195159 | 4.313067881 | 1.61E-05    | 0.0016383 |
| <b>Ephb6</b>    | 1928.115809 | 0.7396353 | 0.21225749 | 3.484613182 | 0.000492849 | 0.0217263 |
| <b>Akap2</b>    | 989.7410576 | 0.7391633 | 0.23262656 | 3.177467489 | 0.001485673 | 0.0474095 |
| <b>Ppfia3</b>   | 3325.75262  | 0.7368452 | 0.18677675 | 3.945058316 | 7.98E-05    | 0.0058788 |
| <b>Ddx3y</b>    | 1617.808649 | 0.7367423 | 0.18019408 | 4.088604688 | 4.34E-05    | 0.0037483 |
| <b>Gcn11l</b>   | 1326.016012 | 0.7340035 | 0.17348952 | 4.230823252 | 2.33E-05    | 0.0022461 |
| <b>Gng3</b>     | 2022.539557 | 0.7338699 | 0.20689081 | 3.547136259 | 0.000389443 | 0.0183669 |
| <b>Ankrd13d</b> | 554.0025687 | 0.7289265 | 0.21440111 | 3.399826244 | 0.000674287 | 0.0269679 |
| <b>Rims4</b>    | 1551.201945 | 0.7248694 | 0.1883106  | 3.849329018 | 0.000118442 | 0.0076933 |
| <b>Pfkl</b>     | 2719.027613 | 0.7226004 | 0.1524646  | 4.73946344  | 2.14E-06    | 0.0003388 |
| <b>Rph3a</b>    | 8002.362404 | 0.7206549 | 0.14966863 | 4.815003048 | 1.47E-06    | 0.0002543 |
| <b>Arhgap44</b> | 2204.520427 | 0.7163333 | 0.18044204 | 3.96988014  | 7.19E-05    | 0.0054783 |
| <b>Depdc5</b>   | 910.7194789 | 0.7153484 | 0.22311859 | 3.206135368 | 0.001345307 | 0.0444131 |
| <b>Ttc9b</b>    | 1429.920292 | 0.7084669 | 0.18119301 | 3.91001212  | 9.23E-05    | 0.006595  |
| <b>Acs14</b>    | 1250.393158 | 0.7047485 | 0.23689218 | 2.974975961 | 0.002930115 | 0.075704  |
| <b>Ccl27a</b>   | 1152.99017  | 0.7042477 | 0.17745398 | 3.968621465 | 7.23E-05    | 0.0054793 |
| <b>Kcnmb4</b>   | 838.4855774 | 0.7038586 | 0.22134158 | 3.179965478 | 0.001472926 | 0.0473632 |
| <b>Snap91</b>   | 4803.149232 | 0.7031996 | 0.19240333 | 3.654820159 | 0.000257362 | 0.0138641 |
| <b>Rpl21</b>    | 2233.183197 | 0.6945749 | 0.15540899 | 4.469335238 | 7.85E-06    | 0.0009477 |
| <b>Rpl24</b>    | 971.9099754 | 0.6925002 | 0.22608778 | 3.062970577 | 0.002191516 | 0.0618407 |
| <b>Sv2b</b>     | 5011.166858 | 0.6906585 | 0.17682754 | 3.905830944 | 9.39E-05    | 0.0066429 |
| <b>Apba2</b>    | 2282.605224 | 0.6882647 | 0.1621924  | 4.243507626 | 2.20E-05    | 0.0021367 |
| <b>Tubb2a</b>   | 6718.493403 | 0.6852323 | 0.17802355 | 3.849110461 | 0.000118548 | 0.0076933 |
| <b>Kdm5d</b>    | 959.1311764 | 0.6846102 | 0.19823839 | 3.45346957  | 0.000553425 | 0.0235578 |
| <b>Dgkz</b>     | 6036.181075 | 0.6842034 | 0.1756695  | 3.894833168 | 9.83E-05    | 0.00679   |
| <b>Rap1gap2</b> | 2966.935294 | 0.6839325 | 0.21908156 | 3.121816638 | 0.001797388 | 0.0540526 |
| <b>Camk1</b>    | 831.3937552 | 0.6797998 | 0.23383764 | 2.907144498 | 0.003647447 | 0.0875387 |
| <b>Nell2</b>    | 6860.150743 | 0.6789371 | 0.18595532 | 3.651076817 | 0.000261143 | 0.0139052 |
| <b>Fam174b</b>  | 451.3167276 | 0.6787389 | 0.22854919 | 2.96977172  | 0.002980211 | 0.0763345 |
| <b>Garnl3</b>   | 1448.540191 | 0.6772764 | 0.19274493 | 3.513848142 | 0.000441665 | 0.0201889 |
| <b>Itpk1</b>    | 1163.09067  | 0.6757199 | 0.23669442 | 2.854819803 | 0.004306125 | 0.0963431 |
| <b>Podxl2</b>   | 1701.054648 | 0.6703299 | 0.16713596 | 4.010686603 | 6.05E-05    | 0.0049195 |
| <b>Btbd3</b>    | 1728.821824 | 0.6698782 | 0.21842681 | 3.066831523 | 0.002163408 | 0.0613351 |
| <b>Enc1</b>     | 9110.539753 | 0.6655024 | 0.16124553 | 4.127260812 | 3.67E-05    | 0.0033255 |
| <b>Syp</b>      | 15181.49607 | 0.6635847 | 0.22961058 | 2.890044055 | 0.003851878 | 0.0899741 |
| <b>Syn1</b>     | 9528.203162 | 0.6633893 | 0.17203768 | 3.856069971 | 0.000115225 | 0.0076761 |
| <b>Bcr</b>      | 7731.294284 | -0.658839 | 0.1935325  | -3.40427858 | 0.000663391 | 0.0269271 |
| <b>Dkk3</b>     | 3795.501853 | 0.6526468 | 0.14420326 | 4.525881259 | 6.01E-06    | 0.0007785 |
| <b>Prkar1b</b>  | 9664.441188 | 0.6471993 | 0.20744841 | 3.119808338 | 0.001809687 | 0.0542031 |
| <b>Adcy2</b>    | 2084.633062 | 0.6467528 | 0.21556468 | 3.00027249  | 0.002697382 | 0.0719431 |
| <b>Rpl27a</b>   | 947.2615204 | 0.6451617 | 0.18107875 | 3.562879002 | 0.000366681 | 0.0177502 |
| <b>Plch2</b>    | 1060.900534 | 0.6446654 | 0.17871253 | 3.607275682 | 0.000309429 | 0.0157427 |
| <b>Ywhah</b>    | 11632.05755 | 0.6419759 | 0.19473301 | 3.296697821 | 0.000978287 | 0.034769  |
| <b>Ucp2</b>     | 699.2587817 | 0.6405998 | 0.1940052  | 3.301972194 | 0.000960076 | 0.0345735 |
| <b>Nlk</b>      | 1661.095398 | 0.6390924 | 0.16205303 | 3.943723783 | 8.02E-05    | 0.0058788 |
| <b>Gnas</b>     | 11894.97242 | 0.6380307 | 0.20049535 | 3.182271616 | 0.001461247 | 0.0471919 |
| <b>Tspan5</b>   | 2312.77734  | 0.6351233 | 0.15443579 | 4.112539557 | 3.91E-05    | 0.0034611 |

|                |             |           |            |             |             |           |
|----------------|-------------|-----------|------------|-------------|-------------|-----------|
| <b>Slc36a1</b> | 1150.370525 | 0.6322061 | 0.21700908 | 2.913270319 | 0.003576648 | 0.0862576 |
| <b>Csmd2</b>   | 802.3050718 | 0.6276194 | 0.21361336 | 2.938109504 | 0.003302204 | 0.0810868 |
| <b>Mturn</b>   | 2000.467348 | 0.6238733 | 0.18817373 | 3.315411414 | 0.000915083 | 0.0334017 |
| <b>Rab26</b>   | 612.8435605 | 0.6153494 | 0.21033868 | 2.925517107 | 0.003438843 | 0.0837499 |
| <b>Magi1</b>   | 1521.683955 | 0.6132036 | 0.20390754 | 3.007262782 | 0.002636118 | 0.0706898 |
| <b>Htr2a</b>   | 672.4175037 | 0.6101961 | 0.20733585 | 2.943032296 | 0.003250145 | 0.0800732 |
| <b>Snap25</b>  | 39699.12314 | 0.6016743 | 0.17270862 | 3.483753893 | 0.000494434 | 0.0217317 |
| <b>Rab3b</b>   | 1142.536572 | 0.5988353 | 0.18975314 | 3.155864804 | 0.00160023  | 0.0499433 |
| <b>Gabra5</b>  | 752.045997  | 0.5982113 | 0.19951524 | 2.998323663 | 0.002714692 | 0.0720169 |
| <b>Map4k3</b>  | 1038.425712 | 0.5975491 | 0.18294342 | 3.266305707 | 0.001089606 | 0.0381773 |
| <b>Rap2a</b>   | 1490.345576 | 0.595476  | 0.16996542 | 3.503512607 | 0.000459165 | 0.0206781 |
| <b>Stmn3</b>   | 5629.624863 | 0.5949313 | 0.15166347 | 3.922706656 | 8.76E-05    | 0.0063453 |
| <b>Cdh22</b>   | 710.2025617 | 0.5946648 | 0.2065874  | 2.878514648 | 0.003995527 | 0.0917427 |
| <b>Slc45a4</b> | 904.7313899 | 0.5936389 | 0.20851757 | 2.846949015 | 0.004414043 | 0.0980195 |
| <b>Tubb4b</b>  | 4476.270029 | 0.5926025 | 0.15480734 | 3.828000114 | 0.000129189 | 0.0083083 |
| <b>Srcin1</b>  | 5255.485505 | 0.5905576 | 0.16421197 | 3.596313011 | 0.000322759 | 0.016199  |
| <b>Tango2</b>  | 1065.843907 | 0.5872566 | 0.20096474 | 2.922187467 | 0.003475823 | 0.0841193 |
| <b>Nrgn</b>    | 24914.26307 | 0.5870354 | 0.16037197 | 3.66046136  | 0.000251762 | 0.0136503 |
