# Supplementary material for: α-Synuclein oligomers potentiate neuroinflammatory NF-κB activity and induce Cav3.2 calcium signaling in astrocytes
Source: PubMed Central journal article supplement (PMC10880263; doi:10.1186/s40035-024-00401-4), 2024-02-21
Supplement: 40035_2024_401_MOESM3_ESM.pdf [file 40035_2024_401_MOESM3_ESM.pdf]

| Accession | Description                                                                                                                           | Symbol  | mock_3.xlsx | mock_2.xlsx | mock_4.xlsx | HiA_1.xlsx  | HiA_2.xlsx  | HiA_3.xlsx  | Average_mock | Average_a1H | St_Dv_mock  | St_Dv_a1H   | MW_p_a1Hvsmock | BH_p_a1Hvsmock | Ratio_a1Hvsmock | Log2_Ratio_a1Hvsmock |
|-----------|---------------------------------------------------------------------------------------------------------------------------------------|---------|-------------|-------------|-------------|-------------|-------------|-------------|--------------|-------------|-------------|-------------|----------------|----------------|-----------------|----------------------|
| QB0W15    | Insulin-like growth factor-binding protein-like 1 OS=Mus musculus OX10090 GN>Igf1bp1 PE=1 Sv2-1 - [IBPL1_MOUSE]                       | Igf1bp1 | 0           | 0           | 0           | 12.98234431 | 38.94703294 | 12.98234431 | 0            | 21.63724052 | 0           | 14.99071997 | 0.05946349     | 0.726530612    | only in a1H     | only in a1H          |
| QR85G7    | ARF-GAP with Rho-GAP domain, ANK repeat and PH domain-containing protein 3 OS=Mus musculus OX10090 GN=Arp3 PE=1 Sv1-1 - [ARAPP_MOUSE] | Arp3    | 0           | 0           | 0           | 18.15570722 | 6.051902406 | 6.051902406 | 0            | 10.08650401 | 0           | 6.988134967 | 0.05946349     | 0.726530612    | only in a1H     | only in a1H          |
| PL7155    | C-X-C motif chemokine 10 OS=Mus musculus OX10090 GN=Cxcl10 PE=1 Sv1-1 - [CXCL10_MOUSE]                                                | Cxcl10  | 0           | 0           | 0           | 258.2531849 | 163.5637967 | 163.5637967 | 0            | 181.7950668 | 0           | 77.35764697 | 0.06360257     | 0.726530612    | only in a1H     | only in a1H          |
| PC2301    | 40S ribosomal protein S13 OS=Mus musculus OX10090 GN=Rps13 PE=1 Sv2-1 - [RPS13_MOUSE]                                                 | Rps13   | 0           | 0           | 0           | 56.67004152 | 69.7156699  | 66.20675152 | 0            | 54.19748738 | 0           | 16.89073806 | 0.06360257     | 0.726530612    | only in a1H     | only in a1H          |
| QC2714    | Hippocaldin 1 OS=Mus musculus OX10090 GN=Hpcad1 PE=1 Sv2-1 - [HPCAD_MOUSE]                                                            | Hpcad1  | 0           | 0           | 0           | 22.70341216 | 24.8619669  | 15.47055867 | 0            | 21.01132584 | 0           | 4.92032817  | 0.06360257     | 0.726530612    | only in a1H     | only in a1H          |
| QS71F8    | Glutamine liver isoform, mitochondrial OS=Mus musculus OX10090 GN=Gl2 PE=1 Sv2-2 - [GL2L_MOUSE]                                       | Gl2     | 0           | 0           | 0           | 106.3209957 | 164.1155316 | 146.9389735 | 0            | 139.1281483 | 0           | 29.67405196 | 0.06360257     | 0.726530612    | only in a1H     | only in a1H          |
| QT75K2    | Seizure protein 6 OS=Mus musculus OX10090 GN=Se6 PE=1 Sv1-1 - [SE26_MOUSE]                                                            | Se6     | 0           | 0           | 0           | 7.474515801 | 11.98504117 | 4.68673154  | 0            | 8.648977539 | 0           | 2.931081266 | 0.06360257     | 0.726530612    | only in a1H     | only in a1H          |
| Q8C7A1    | Protein shisa-4 OS=Mus musculus OX10090 GN=Shisa4 PE=1 Sv1-1 - [SHSA4_MOUSE]                                                          | Shisa4  | 0           | 0           | 0           | 21.14700939 | 31.32684657 | 29.69037139 | 0            | 27.38807564 | 0           | 5.466506908 | 0.06360257     | 0.726530612    | only in a1H     | only in a1H          |
| QBVC8X    | UBX domain-containing protein 4 OS=Mus musculus OX10090 GN=Ubxn4 PE=1 Sv1-1 - [UBXN4_MOUSE]                                           | Ubxn4   | 0           | 0           | 0           | 67.89642631 | 82.80475368 | 5.443233569 | 0            | 52.04813806 | 0           | 41.04363056 | 0.06360257     | 0.726530612    | only in a1H     | only in a1H          |
| Q92A05    | Retinoid-inducible serine carboxypeptidase OS=Mus musculus OX10090 GN=Scepp1 PE=1 Sv2-2 - [RISC_MOUSE]                                | Scepp1  | 0           | 0           | 0           | 6.640884577 | 29.35080368 | 32.08729782 | 0            | 22.61962602 | 0           | 14.09511248 | 0.06360257     | 0.726530612    | only in a1H     | only in a1H          |
| QC9C05    | Regulator of G-protein signaling 10 OS=Mus musculus OX10090 GN=Rgs10 PE=1 Sv1-1 - [RGS10_MOUSE]                                       | Rgs10   | 0           | 0           | 0           | 7.629958084 | 17.57981414 | 4.13764434  | 0            | 6.75706851  | 0           | 1.19442420  | 0.06360257     | 0.726530612    | only in a1H     | only in a1H          |
| Q9DCN2    | NADH-cytochrome b5 reductase 3 OS=Mus musculus OX10090 GN=Cybr5 PE=1 Sv3-3 - [NBR3_MOUSE]                                             | Cybr5   | 0           | 0           | 0           | 26.91794647 | 26.74621469 | 17.88805372 | 0            | 23.85073829 | 0           | 5.164501618 | 0.06360257     | 0.726530612    | only in a1H     | only in a1H          |
| Q95Y93    | dCTP pyrophosphatase 4 OS=Mus musculus OX10090 GN=Dctpp1 PE=1 Sv1-1 - [DCTP1_MOUSE]                                                   | Dctpp1  | 0           | 0           | 0           | 19.14232066 | 16.60989298 | 11.74816526 | 0            | 15.83345617 | 0           | 3.757723468 | 0.06360257     | 0.726530612    | only in a1H     | only in a1H          |
| AZANX9    | Zinc finger protein 711 OS=Mus musculus OX10090 GN>Zfp711 PE=1 Sv1-1 - [ZNF711_MOUSE]                                                 | Zfp711  | 120.9397439 | 84.08222373 | 17.35343626 | 0.00000000  | 0.00000000  | 0.00000000  | 0            | 74.12153446 | 0           | 52.50680062 | 0.06360257     | 0.726530612    | only in a1H     | only in a1H          |
| Q9PFX2    | Papilin OS=Mus musculus OX10090 GN=Papn PE=1 Sv2-2 - [PPN_MOUSE]                                                                      | Papn    | 26.42014415 | 15.48638999 | 20.03902582 | 0           | 0           | 0           | 20.64851999  | 0           | 5.492298925 | 0           | 0.06360257     | 0.726530612    | only in a1H     | HNLM                 |
| QR8209    | Adhesion G-protein coupled receptor 1 OS=Mus musculus OX10090 GN=Adgrg1 PE=1 Sv1-1 - [AGRG1_MOUSE]                                    | Adgrg1  | 173.3998939 | 40.43759453 | 36.1331504  | 0           | 0           | 32.29541664 | 116.6362399  | 10.7651388  | 135.7770828 | 18.64576735 | 0.0765225      | 0.726530612    | 0.092296160     | -3.437578936         |
| Q9D9W6    | Protein FAM217A OS=Mus musculus OX10090 GN=Fam217a PE=1 Sv1-1 - [F217A_MOUSE]                                                         | Fam217a | 58.69416194 | 14.47422787 | 95.65403107 | 4.132386666 | 0           | 0           | 99.75845057  | 13.7742222  | 43.26299032 | 23.8834554  | 0.0765225      | 0.726530612    | 0.130807968     | -2.856472607         |
| PL1327    | Protein mago nashi homolog OS=Mus musculus OX10090 GN=Mago PE=1 Sv1-1 - [MGN_MOUSE]                                                   | Mago    | 92.82965264 | 91.24213167 | 70.54770288 | 0           | 0           | 0           | 84.87316289  | 16.2898906  | 12.43157906 | 28.23066252 | 0.0765225      | 0.726530612    | 0.280932704     | -2.003592760         |
| Q9W985    | Nucleoside diphosphate kinase 3 OS=Mus musculus OX10090 GN=Nme3 PE=1 Sv3-3 - [NDK3_MOUSE]                                             | Nme3    | 9.52634071  | 16.3553782  | 15.81873161 | 0           | 0           | 0           | 9.131312434  | 13.90014549 | 3.037704154 | 3.979131752 | 0.0765225      | 0.726530612    | 0.218537579     | -1.294066173         |
| PO6867    | 40S ribosomal protein S20 OS=Mus musculus OX10090 GN=Rps20 PE=1 Sv1-1 - [RS20_MOUSE]                                                  | Rps20   | 208.9874875 | 69.66249584 | 347.4036195 | 430.6817521 | 230.3118191 | 116.1041597 | 336.1344969  | 80.4932145  | 105.659054  | 0.0765225   | 0.726530612    | 2.895115779    | 1.53361895      |                      |
| Q62376    | 2-amino naphthal ribonucleoprotein 70 kDa OS=Mus musculus OX10090 GN=Snrp70 PE=1 Sv2-2 - [RUI1_MOUSE]                                 | Snrp70  | 14.49998989 | 0           | 0           | 47.72174939 | 61.35239934 | 45.23994427 | 13.8332966   | 49.3013635  | 20.3062981  | 10.08813546 | 0.0765225      | 0.726530612    | 3.90090583      | 1.848036814          |
| QR8508    | DNA cytosine 5-methyltransferase 3A OS=Mus musculus OX10090 GN=Dnm3a PE=1 Sv2-2 - [DNM3A_MOUSE]                                       | Dnm3a   | 13.52387687 | 0           | 0           | 72.67193372 | 17.86163304 | 22.46749325 | 4.50758059   | 23.031197   | 7.80801390  | 5.44452188  | 0.0765225      | 0.726530612    | 3.766047391     | 1.931601214          |
| Q6P9Y2    | U-small nuclear ribonucleoprotein OS=Mus musculus OX10090 GN=Uad PE=1 Sv2-2 - [AEO_MOUSE]                                             | Uad     | 30.37228885 | 0           | 0           | 44.22688783 | 43.84780458 | 33.14664529 | 0            | 12.1409628  | 0           | 47.11162    | 0.0765225      | 0.726530612    | 3.950790000     | 1.999905900          |
| QR9203    | Tripeptidyl-peptidase 1 OS=Mus musculus OX10090 GN=Tpp1 PE=1 Sv2-2 - [TPP1_MOUSE]                                                     | Tpp1    | 0           | 0           | 0           | 44.85070310 | 56.38329816 | 77.89283659 | 13.92477425  | 57.0228496  | 24.1841468  | 17.70145657 | 0.0765225      | 0.726530612    | 4.143857841     | 2.029794511          |
| QR8543    | COP9 signalosome complex subunit 3 OS=Mus musculus OX10090 GN=Cop3 PE=1 Sv3-3 - [CSN3_MOUSE]                                          | Cop3    | 40.79543699 | 0           | 0           | 90.79547445 | 60.01737489 | 54.07063209 | 16.19163456  | 70.75781481 | 24.0043372  | 18.59072665 | 0.0765225      | 0.726530612    | 4.638978587     | 1.505799469          |
| PA8024    | Eukaryotic translation initiation factor 1 OS=Mus musculus OX10090 GN=EIF1 PE=1 Sv2-2 - [EIF1_MOUSE]                                  | EIF1    | 63.0717003  | 0           | 0           | 113.6493452 | 100.9675408 | 67.53726294 | 0            | 123.90001   | 94.50138297 | 36.4146315  | 0.0765225      | 0.726530612    | 4.473545941     | 2.16141883           |
| QC8C11    | Protein argonaute-1 OS=Mus musculus OX10090 GN=Ago1 PE=1 Sv2-2 - [AGO1_MOUSE]                                                         | Ago1    | 0           | 0           | 0           | 31.07461662 | 22.92393692 | 20.59704204 | 4.97243049   | 24.86699739 | 6.11605791  | 5.500981678 | 0.0765225      | 0.726530612    | 4.927142963     | 2.321103949          |
| Q9UQR7    | Peptidyl-prolyl cis-trans isomerase NIMA-interacting 1 OS=Mus musculus OX10090 GN=Pin1 PE=1 Sv1-1 - [PIN1_MOUSE]                      | Pin1    | 54.19958788 | 0           | 0           | 103.1118055 | 103.8418197 | 67.76280145 | 18.6652953   | 91.57214233 | 31.29214705 | 20.62272439 | 0.0765225      | 0.726530612    | 5.068607233     | 2.341589374          |
| Q92174    | Heterogeneous nuclear ribonucleoprotein-like OS=Mus musculus OX10090 GN=Hnmp1 PE=1 Sv3-3 - [HNML1_MOUSE]                              | Hnmp1   | 43.99570173 | 0           | 0           | 91.19755899 | 87.73883924 | 45.36489928 | 14.66090958  | 74.7660515  | 25.39342468 | 25.52159684 | 0.0765225      | 0.726530612    | 5.09975153      | 2.350428958          |
| QR8508    | DNA cytosine 5-methyltransferase 3A OS=Mus musculus OX10090 GN=Dnm3a PE=1 Sv2-2 - [DNM3A_MOUSE]                                       | Dnm3a   | 13.52387687 | 0           | 0           | 72.67193372 | 17.86163304 | 22.46749325 | 4.50758059   | 23.031197   | 7.80801390  | 5.44452188  | 0.0765225      | 0.726530612    | 5.10499162      | 2.351910286          |
| Y97822    | ACE2 leucine-rich nuclear phosphoprotein 32 family member E OS=Mus musculus OX10090 GN=Anp32e PE=1 Sv2-2 - [AN32E_MOUSE]              | Anp32e  | 43.57657612 | 0           | 0           | 85.05833472 | 104.0791474 | 47.17655663 | 14.52525327  | 78.77137908 | 25.15894796 | 28.9675285  | 0.0765225      | 0.726530612    | 5.422962478     | 4.390811188          |
| PA7199    | Quinone oxidoreductase OS=Mus musculus OX10090 GN=Cryz PE=1 Sv1-1 - [QOR_MOUSE]                                                       | Cryz    | 34.30443628 | 0           | 0           | 56.18995335 | 83.83246583 | 57.49033978 | 11.43481209  | 65.87345299 | 18.8056752  | 15.59770241 | 0.0765225      | 0.726530612    | 5.52743583      | 2.525478586          |
| QB0UW2    | F-box only protein 2 OS=Mus musculus OX10090 GN=Fbxo2 PE=1 Sv1-1 - [FBX2_MOUSE]                                                       | Fbxo2   | 21.47846786 | 0           | 0           | 40.8404556  | 59.01991142 | 26.6224688  | 7.15948988   | 48.24212795 | 12.4005992  | 15.27705688 | 0.0765225      | 0.726530612    | 5.983964251     | 2.581015556          |
| QO7589    | Peripheral plasma membrane protein CASK OS=Mus musculus OX10090 GN=Cask PE=1 Sv2-2 - [CSKP_MOUSE]                                     | Cask    | 0           | 0           | 0           | 8.036304309 | 15.82172976 | 17.88830716 | 14.47780742  | 6.66778810  | 10.62635748 | 6.639762456 | 0.0765225      | 0.726530612    | 5.9896257       | 2.584067105          |
| PL15209   | BDNF/NT-3 growth factors receptor OS=Mus musculus OX10090 GN=Ntrk2 PE=1 Sv1-1 - [NTRK2_MOUSE]                                         | Ntrk2   | 12.02261660 | 0           | 0           | 18.0113608  | 35.3008873  | 18.09706494 | 4.00722003   | 24.12941991 | 6.94070863  | 9.760282912 | 0.0765225      | 0.726530612    | 6.021486191     | 2.901119609          |
| Y07039    | TP53-binding protein 1 OS=Mus musculus OX10090 GN=Tps3b1 PE=1 Sv3-3 - [TP53B_MOUSE]                                                   | Tps3b1  | 0           | 0           | 0           | 13.9945165  | 11.3532973  | 8.50915129  | 6.68831721   | 11.12001127 | 2.78058667  | 2.558001182 | 0.0765225      | 0.726530612    | 7.336641246     | 2.590119674          |
| Q92760    | 2-imino-butanoate 2-imino-propionate deaminase OS=Mus musculus OX10090 GN=Rida PE=1 Sv3-3 - [RIDA_MOUSE]                              | Rida    | 30.93557952 | 0           | 0           | 51.44966686 | 151.805898  | 33.80398227 | 10.13186585  | 79.01646771 | 17.86067558 | 63.65124875 | 0.0765225      | 0.726530612    | 7.662764132     | 2.937784594          |
| PD5199    | Aldehyde dehydrogenase family 1 member A3 OS=Mus musculus OX10090 GN=Alhd1a3 PE=1 Sv1-1 - [ALHD1_MOUSE]                               | Alhd1a3 | 0           | 0           | 0           | 10.50918753 | 37.87448664 | 32.12679653 | 3.503062511  | 26.8702892  | 6.06748252  | 14.37244441 | 0.0765225      | 0.726530612    | 7.670261454     | 2.939321854          |
| Q61730    | V-type proton ATPase subunit b, brain isoform OS=Mus musculus OX10090 GN=Vatp1b PE=1 Sv1-1 - [VATP1_MOUSE]                            | Vatp1b  | 72.66918257 | 96.93670517 | 121.0707975 | 0           | 0           | 0           | 96.89224943  | 24.0393689  | 24.2083818  | 21.54057070 | 0              | 0.726530612    | 2.48104163      | -2.01098215          |
| Q9XK0     | Protein canopy homolog 2 OS=Mus musculus OX10090 GN=Cnp2 PE=1 Sv1-1 - [CNP2_MOUSE]                                                    | Cnp2    | 130.4086202 | 260.8715444 | 480.1481253 | 52.6243040  | 44.29296214 | 60.996255   | 17.72538146  | 52.63786591 | 72.59001707 | 8.351674793 | 0.1            | 0.726530612    | 0.29663233      | -1.751647347         |
| QR89P2    | Reticulocalbin-2 OS=Mus musculus OX10090 GN=Rcn2 PE=1 Sv1-1 - [RCN2_MOUSE]                                                            | Rcn2    | 54.35811282 | 303.4263557 | 86.01385101 | 35.50144778 | 36.23872622 | 48.85388399 | 114.5290066  | 38.9801933  | 78.54636014 | 50.04130699 | 0.1            | 0.726530612    | 0.155033655     | -1.55033655          |
| QR8H97    | Reticulocalbin-3 OS=Mus musculus OX10090 GN=Rcn3 PE=1 Sv1-1 - [RCN3_MOUSE]                                                            | Rcn3    | 17.84301122 | 66.6452624  | 21.41586024 | 9.510975934 | 6.73295841  | 14.32350525 | 25.108078    | 10.18913567 | 6.95597177  | 3.840642133 | 0.1            | 0.726530612    | 0.405811207     | -1.301119921         |
| PL11087   | Collagen alpha-1(I) chain OS=Mus musculus OX10090 GN=Col1a1 PE=1 Sv1-4 - [COL1A_MOUSE]                                                | Col1a1  | 41.27204191 | 30.65352524 | 43.73762053 | 30.15492838 | 30.91587937 | 0           | 49.88503836  | 20.3693662  | 12.84220159 | 17.63372892 | 0.1            | 0.726530612    | 0.490807685     | -1.293087648         |
| Q92733    | 40S ribosomal protein S12 OS=Mus musculus OX10090 GN=Rps12 PE=1 Sv2-2 - [RS12_MOUSE]                                                  | Rps12   | 67.0684074  | 61.25339175 | 48.16610994 | 236.9666974 | 262.0851355 | 226.5480094 | 59.0039071   | 24.48314048 | 9.91362424  | 18.31434655 | 0.1            | 0.726530612    | 0.409816366     | -1.28695044          |
| Y97370    | Sodium/potassium-transporting ATPase subunit beta-4 OS=Mus musculus OX10090 GN=Atp1b3 PE=1 Sv1-1 - [ATB3_MOUSE]                       | Atp1b3  | 44.4512596  | 26.99884386 | 33.64915833 | 18.2430167  | 24.5091911  | 0           | 35.0242059   | 14.464      |             |             |                |                |                 |                      |

|        |                                                                                                                                   |          |              |             |             |              |             |             |     |             |              |              |
|--------|-----------------------------------------------------------------------------------------------------------------------------------|----------|--------------|-------------|-------------|--------------|-------------|-------------|-----|-------------|--------------|--------------|
| Q06890 | Clusterin OS=Mus musculus OX10090 GN=Clu PE=1 Sv=1 - [CLUST_MOUSE]                                                                | Clu      | 1233.187512  | 866.3147977 | 1028.302285 | 1729.528442  | 197.292036  | 1598.350406 | 0.1 | 0.726530612 | 1.766468754  | 0.82086823   |
| P25206 | DNA replication licensing factor MCM3 OS=Mus musculus OX10090 GN=Mcm3 PE=1 Sv=2 - [MCM3_MOUSE]                                    | Mcm3     | 54.72861166  | 35.27264231 | 48.59857544 | 92.30572125  | 97.69239127 | 55.04983732 | 0.1 | 0.726530612 | 1.768059345  | 0.8221667    |
| L12025 | Mdkine OS=Mus musculus OX10090 GN=Mdk PE=1 Sv=2 - [Mdk_MOUSE]                                                                     | Mdk      | 49.52661409  | 46.70429993 | 47.77463646 | 57.94377151  | 110.920585  | 91.12066152 | 0.1 | 0.726530612 | 1.772137983  | 0.82549094   |
| Q6P893 | Polybeta N-acetylgalactosaminyltransferase 2 OS=Mus musculus OX10090 GN=Galnt2 PE=1 Sv=1 - [GALT2_MOUSE]                          | Galnt2   | 28.6043409   | 49.7970388  | 52.0222429  | 59.24494811  | 99.83639843 | 43.47543487 | 0.1 | 0.726530612 | 1.79253167   | 0.847621494  |
| O88531 | Palmitoyl-protein thioesterase 4 OS=Mus musculus OX10090 GN=PP1A PE=1 Sv=2 - [PP1A_MOUSE]                                         | PP1a     | 42.40594821  | 33.67399089 | 42.71856456 | 67.02085127  | 75.46569976 | 54.13081831 | 0.1 | 0.726530612 | 1.803723663  | 0.83176387   |
| Q37C02 | Positive phospholipase B-like 2 OS=Mus musculus OX10090 GN=Pfb2 PE=1 Sv=2 - [Pfb2_MOUSE]                                          | Pfb2d    | 30.13256447  | 33.32039187 | 48.15502235 | 63.91159316  | 52.13623819 | 28.01900139 | 0.1 | 0.726530612 | 1.845461599  | 0.86018266   |
| Q9JK96 | RNA-binding protein Nova-1 OS=Mus musculus OX10090 GN=Nov1 PE=1 Sv=2 - [NOVA1_MOUSE]                                              | Nov1     | 42.65016634  | 29.73457407 | 0           | 45.69140562  | 50.82284442 | 50.74226664 | 0.1 | 0.726530612 | 1.849505570  | 0.824355622  |
| Q09131 | Lithonectin 5-transferase omega-1 OS=Mus musculus OX10090 GN=Gsto1 PE=1 Sv=2 - [GSTO1_MOUSE]                                      | Gsto1    | 138.12512556 | 68.79725909 | 74.33778096 | 20.13065453  | 245.7492088 | 151.7276905 | 0.1 | 0.726530612 | 1.872232798  | 1.089982817  |
| P29416 | Beta-hexosaminidase subunit alpha OS=Mus musculus OX10090 GN=Hexa PE=1 Sv=2 - [HEXA_MOUSE]                                        | Hexa     | 32.71058865  | 30.12643157 | 0           | 32.77882334  | 56.33777049 | 45.42872486 | 0.1 | 0.726530612 | 1.236474074  | 1.09523181   |
| A2ASQ1 | Agrin OS=Mus musculus OX10090 GN=Agrn PE=1 Sv=1 - [AGRIN_MOUSE]                                                                   | Agrn     | 168.5643997  | 137.7213219 | 135.4766245 | 309.3324762  | 362.0946262 | 316.2781082 | 0.1 | 0.726530612 | 1.232010714  | 1.162280412  |
| P01029 | Exemplin C4-B OS=Mus musculus OX10090 GN=C4b PE=1 Sv=1 - [C4B_MOUSE]                                                              | C4b      | 208.3802379  | 172.1104489 | 172.110761  | 468.3563353  | 464.8039399 | 128.4829397 | 0.1 | 0.726530612 | 1.276679777  | 1.186931386  |
| P54754 | Ephrin type B receptor 3 OS=Mus musculus OX10090 GN=Ephrb3 PE=1 Sv=2 - [EPHB3_MOUSE]                                              | Ephrb3   | 0            | 11.85743931 | 11.26020436 | 46.9443521   | 75.02689011 | 15.72159664 | 0.1 | 0.726530612 | 1.901982757  | 1.202760221  |
| Q99184 | Eukaryotic translation initiation factor 3 subunit M OS=Mus musculus OX10090 GN=EIF3m PE=1 Sv=1 - [EIF3M_MOUSE]                   | EIF3m    | 45.85775753  | 31.00523267 | 0           | 49.345951    | 87.5599451  | 54.0712977  | 0.1 | 0.726530612 | 1.453368557  | 1.294763979  |
| Q9161  | Polyketide N-acetylglucosaminyltransferase 16 OS=Mus musculus OX10090 GN=Galnt16 PE=2 Sv=2 - [GLT16_MOUSE]                        | Galnt16  | 58.78513568  | 46.08318716 | 50.03873586 | 147.9032093  | 180.9403917 | 70.52792777 | 0.1 | 0.726530612 | 1.845461599  | 1.366486975  |
| H4K774 | Eukaryotic 5-transferase Mus 5 OS=Mus musculus OX10090 GN=Gstm5 PE=1 Sv=1 - [GSTM5_MOUSE]                                         | Gstm5    | 53.9549071   | 48.00245869 | 51.83024266 | 153.944279   | 1450.012422 | 733.546786  | 0.1 | 0.726530612 | 1.463078927  | 1.463078927  |
| Q91219 | Hyaluronidase 1 OS=Mus musculus OX10090 GN=Hyal1 PE=1 Sv=3 - [HYAL1_MOUSE]                                                        | Hyal1    | 14.27013117  | 10.21719246 | 0           | 25.77684497  | 29.4806205  | 11.8077455  | 0.1 | 0.726530612 | 1.827113239  | 1.499329207  |
| Q4KM14 | Costars family protein ABRACL OS=Mus musculus OX10090 GN=Abracl PE=1 Sv=1 - [ABRAL_MOUSE]                                         | Abracl   | 0            | 23.34144585 | 56.43099154 | 56.2063721   | 36.17563361 | 10.02240709 | 0.1 | 0.726530612 | 1.896024571  | 1.534073843  |
| Q924M7 | Mannose 6-phosphate isomerase OS=Mus musculus OX10090 GN=Mpi PE=1 Sv=1 - [MPI_MOUSE]                                              | Mpi      | 35.6627699   | 26.75045106 | 0           | 17.15229144  | 68.1489163  | 47.11898769 | 0.1 | 0.726530612 | 1.912622806  | 1.54231886   |
| Q9R0P3 | S-formylglutathione hydrolase OS=Mus musculus OX10090 GN=Edsd PE=1 Sv=1 - [EDSD_MOUSE]                                            | Edsd     | 25.5652808   | 72.95152322 | 98.78779963 | 435.7435232  | 648.107123  | 270.4492863 | 0.1 | 0.726530612 | 1.671639522  | 1.665228827  |
| P28798 | Progranulin OS=Mus musculus OX10090 GN=Grn PE=1 Sv=2 - [GRN_MOUSE]                                                                | Grn      | 0            | 26.9637313  | 25.44869373 | 31.25418793  | 77.31362709 | 58.64219514 | 0.1 | 0.726530612 | 1.637572495  | 1.637572495  |
| ER106E | Retinectinoid epiphythoxanthin/phospholipidase family member 2 OS=Mus musculus OX10090 GN=Enpp2 PE=1 Sv=3 - [ENPP2_MOUSE]         | Enpp2    | 23.90041514  | 0           | 21.46718344 | 31.82883887  | 82.2023476  | 31.82787893 | 0.1 | 0.726530612 | 3.258135634  | 1.704047035  |
| P1517  | Glutathione S-transferase P1 OS=Mus musculus OX10090 GN=GstP1 PE=1 Sv=2 - [GSTP1_MOUSE]                                           | GstP1    | 46.17878183  | 167.7693915 | 139.2715546 | 923.2177693  | 1175.921564 | 526.9903415 | 0.1 | 0.726530612 | 3.41534268   | 1.72203305   |
| B91998 | Noelin OS=Mus musculus OX10090 GN=No1 PE=1 Sv=1 - [NOEL1_MOUSE]                                                                   | No1m1    | 38.09723742  | 22.84723447 | 0           | 82.6878161   | 81.62757314 | 62.7362065  | 0.1 | 0.726530612 | 3.725539199  | 1.897449243  |
| Q62922 | 4-aminobutyrate aminotransferase, mitochondrial OS=Mus musculus OX10090 GN=Abat PE=1 Sv=1 - [GABT_MOUSE]                          | Abat     | 11.483383309 | 11.82254564 | 0           | 18.49330349  | 32.20334394 | 11.48823846 | 0.1 | 0.726530612 | 4.641765949  | 2.21467378   |
| P14901 | Heme oxxygenase 1 OS=Mus musculus OX10090 GN=Hmox1 PE=1 Sv=1 - [HMOX1_MOUSE]                                                      | Hmox1    | 203.4832244  | 136.849295  | 138.7883142 | 1027.048524  | 1096.691579 | 414.8227954 | 0.1 | 0.726530612 | 5.298834633  | 2.405552759  |
| P50396 | Rab GDP dissociation inhibitor alpha OS=Mus musculus OX10090 GN=Gdi1 PE=1 Sv=3 - [GDI_MOUSE]                                      | Gdi1     | 1389.913021  | 630.279289  | 635.7134941 | 5299.438458  | 1494.919186 | 8287.669047 | 0.1 | 0.726530612 | 5.657278866  | 2.500108288  |
| Q97797 | Galectin-3-binding protein OS=Mus musculus OX10090 GN=Lgals3bp PE=1 Sv=1 - [LG3BP_MOUSE]                                          | Lgals3bp | 67.39048445  | 37.96507622 | 46.53989791 | 1223.071306  | 629.6656362 | 221.5932837 | 0.1 | 0.726530612 | 1.734680358  | 3.781024296  |
| Q922Q9 | Chitinase domain-containing protein 1 OS=Mus musculus OX10090 GN=Chid1 PE=1 Sv=1 - [CHID1_MOUSE]                                  | Chid1    | 26.77648425  | 43.68243555 | 8.233212248 | 0            | 0           | 10.06174411 | 0.1 | 0.84038627  | 0.12636402   | -2.985020227 |
| Q01705 | Neurogenic locus notch homolog protein 1 OS=Mus musculus OX10090 GN=Notch1 PE=1 Sv=3 - [NOTCH1_MOUSE]                             | Notch1   | 26.69937361  | 24.51177969 | 30.76678815 | 0            | 0           | 26.47319284 | 0.1 | 0.84038627  | 0.322696931  | -1.631748237 |
| Q02788 | Collagen alpha-2(VI) chain OS=Mus musculus OX10090 GN=Col6a2 PE=1 Sv=3 - [COL6A_MOUSE]                                            | Col6a2   | 20.79099717  | 33.66553166 | 28.73193504 | 0            | 0           | 28.88855456 | 0.1 | 0.726530612 | 0.337617474  | -1.566538521 |
| Q991F5 | Ribosome-binding protein 1 OS=Mus musculus OX10090 GN=Rbp1 PE=1 Sv=2 - [RBP1_MOUSE]                                               | Rbp1     | 49.17822146  | 0           | 0           | 176.985444   | 160.9038965 | 8.9594208   | 0.1 | 0.726530612 | 1.13577247   | 1.219736042  |
| Q9JMA1 | Ubiquitin carboxyl-terminal hydrolase 14 OS=Mus musculus OX10090 GN=Usp14 PE=1 Sv=3 - [UBP14_MOUSE]                               | Usp14    | 128.3649657  | 0           | 0           | 143.5420643  | 161.6790706 | 27.66552656 | 0.1 | 0.84038627  | 1.249056407  | 1.286233449  |
| Q99WA3 | Mitotic checkpoint protein BUB3 OS=Mus musculus OX10090 GN=Bub3 PE=1 Sv=2 - [BUB3_MOUSE]                                          | Bub3     | 135.6663215  | 0           | 0           | 100.4332075  | 154.917076  | 44.80352147 | 0.1 | 0.84038627  | 1.326124604  | 1.326124604  |
| P47754 | F-actin-capping protein subunit alpha-2 OS=Mus musculus OX10090 GN=Capz2 PE=1 Sv=3 - [CAZ2_MOUSE]                                 | Capz2    | 386.5210822  | 0           | 0           | 391.8485905  | 430.5496536 | 17.1642946  | 0.1 | 0.84038627  | 1.583051196  | 1.36937527   |
| Q9D280 | Acetoacetyl-CoA synthetase OS=Mus musculus OX10090 GN=Aacs PE=1 Sv=1 - [AACS_MOUSE]                                               | Aacs     | 30.161347512 | 32.61443018 | 14.79852212 | 0            | 0           | 10.18623309 | 0.1 | 0.84038627  | 1.58054238   | 1.370752478  |
| P55264 | Adenosine kinase OS=Mus musculus OX10090 GN=Adk PE=1 Sv=2 - [ADK_MOUSE]                                                           | Adk      | 86.30342497  | 0           | 0           | 88.06200447  | 93.07842829 | 45.64994777 | 0.1 | 0.84038627  | 1.627185035  | 1.39517418   |
| Q8C878 | NEDD8-activating enzyme E1 catalytic subunit OS=Mus musculus OX10090 GN=Uba3 PE=1 Sv=2 - [UBA3_MOUSE]                             | Uba3     | 65.25472089  | 0           | 0           | 70.14999706  | 72.58405401 | 31.62410354 | 0.1 | 0.84038627  | 1.617454694  | 1.417454694  |
| P61087 | Ubiquitin-conjugating enzyme E2 K OS=Mus musculus OX10090 GN=Ube2k PE=1 Sv=3 - [UBE2K_MOUSE]                                      | Ube2k    | 193.8255647  | 0           | 0           | 221.6176287  | 211.0762622 | 91.9252397  | 0.1 | 0.84038627  | 1.696762391  | 1.429087415  |
| Q910D4 | COP9 signalosome complex subunit 1 OS=Mus musculus OX10090 GN=Cps1 PE=1 Sv=1 - [CSN1_MOUSE]                                       | Cps1     | 49.17272144  | 0           | 0           | 50.11216006  | 54.65438092 | 23.61970733 | 0.1 | 0.84038627  | 1.73316025   | 1.456507447  |
| P28588 | Ataxin-10 OS=Mus musculus OX10090 GN=Atxn10 PE=1 Sv=2 - [ATXN10_MOUSE]                                                            | Atxn10   | 74.93821142  | 0           | 0           | 92.01546545  | 84.24841037 | 108.7830581 | 0.1 | 0.84038627  | 1.76461812   | 1.452279799  |
| Q9C230 | Obg-like ATPase 1 OS=Mus musculus OX10090 GN=Ola1 PE=1 Sv=1 - [OLA1_MOUSE]                                                        | Ola1     | 135.30165339 | 0           | 0           | 162.300303   | 170.2948466 | 43.17893093 | 0.1 | 0.84038627  | 1.770852019  | 1.470293664  |
| Q91910 | Metastasis-associated protein MTA2 OS=Mus musculus OX10090 GN=Mta2 PE=1 Sv=1 - [MTA2_MOUSE]                                       | Mta2     | 114.45703707 | 0           | 0           | 135.0107389  | 136.6189897 | 45.48138761 | 0.1 | 0.84038627  | 1.770128679  | 1.470421162  |
| Q921F2 | TAR DNA-binding protein class 43 OS=Mus musculus OX10090 GN=Trdbp PE=1 Sv=1 - [TADBP_MOUSE]                                       | Trdbp    | 193.5676673  | 0           | 0           | 219.997445   | 40.32201099 | 276.2475789 | 0.1 | 0.84038627  | 1.771986882  | 1.470920243  |
| Q8R383 | Succinate dehydrogenase [ubiquinone] flavoprotein subunit, mitochondrial OS=Mus musculus OX10090 GN=SdhA PE=1 Sv=1 - [SDHA_MOUSE] | SdhA     | 0            | 44.52537539 | 38.0684997  | 15.68378227  | 11.87599588 | 22.5792321  | 0.1 | 0.84038627  | 1.779516984  | 1.47843205   |
| O88544 | COP9 signalosome complex subunit 4 OS=Mus musculus OX10090 GN=Cops4 PE=1 Sv=1 - [CSN4_MOUSE]                                      | Cops4    | 74.80392542  | 0           | 0           | 80.20612316  | 69.44969589 | 33.12799533 | 0.1 | 0.84038627  | 1.79361512   | 1.482162312  |
| OS1016 | Probable ATP-dependent RNA helicase DDX17 OS=Mus musculus OX10090 GN=Ddx17 PE=1 Sv=1 - [DDX17_MOUSE]                              | Ddx17    | 189.8937474  | 0           | 0           | 195.019066   | 259.4893768 | 82.93840248 | 0.1 | 0.84038627  | 1.8302518074 | 1.510613636  |
| Q916D9 | Probable ATP-dependent RNA helicase DDX18 OS=Mus musculus OX10090 GN=Ddx18 PE=1 Sv=1 - [DDX18_MOUSE]                              | Ddx18    | 189.8937474  | 0           | 0           | 195.019066   | 259.4893768 | 82.93840248 | 0.1 | 0.84038627  | 1.8302518074 | 1.510613636  |
| Q9J105 | DAZ-associated protein 1 OS=Mus musculus OX10090 GN=Daazp1 PE=1 Sv=2 - [DAZP1_MOUSE]                                              | Daazp1   | 114.308666   | 0           | 0           | 120.240337   | 153.336813  | 52.48337449 | 0.1 | 0.84038627  | 1.849088227  | 1.510662453  |
| Q62422 | Osteoclast-stimulating factor 1 OS=Mus musculus OX10090 GN=Ostf1 PE=1 Sv=2 - [OSTF1_MOUSE]                                        | Ostf1    | 12.99064471  | 0           | 0           | 29.64272931  | 27.10608568 | 7.46817304  | 0.1 | 0.84038627  | 1.892091375  | 1.532122126  |
| Q8K3X4 | Probable E3 ubiquitin-protein ligase IRF2BP1 OS=Mus musculus OX10090 GN=Irf2bp1 PE=1 Sv=1 - [IR2BP1_MOUSE]                        | Irf2bp1  | 168.21049028 | 0           | 0           | 29.52742024  | 42.65435751 | 11.73372636 | 0.1 | 0.84038627  | 1.930327101  | 1.552393165  |
| Q8M888 | Cathepsin O OS=Mus musculus OX10090 GN=CtsO PE=2 Sv=1 - [CATO_MOUSE]                                                              | CtsO     | 0            | 44.11592158 | 0           | 32.35363921  | 47.47205114 | 15.76173396 | 0.1 | 0.84038627  | 1.960167054  | 1.575390154  |
| Q9D8W5 | 26S proteasome non-ATPase regulatory subunit 12 OS=Mus musculus OX10090 GN=Psm12 PE=1 Sv=4 - [PSD12_MOUSE]                        | Psm12    | 62.71102033  | 0           | 0           | 83.9458898   | 71.8187366  | 31.85481187 | 0.1 | 0.84038627  | 1.983388897  | 1.577169644  |
| Q9R105 | Echmidrom microtubule-associated protein-like 4 OS=Mus musculus OX10090 GN=Emi4 PE=1 Sv=1 - [EMIA4_MOUSE]                         | Emi4     | 0            | 31.11452305 | 35.8514333  | 11.878472336 | 9.39058817  | 16.26497579 | 0.1 | 0.84038627  | 1.990200076  | 1.590722329  |
| Q8BP47 | Asparagine--RNA ligase, cytoplasmic OS=Mus musculus OX10090 GN=NARS1 PE=1 Sv=2 - [SYNC_MOUSE]                                     | NARS1    | 47.15773214  | 0           | 0           | 55.9568805   | 61.6133859  | 26.9642643  | 0.1 | 0.84038627  | 1.801938871  | 1.594048085  |
| Q9CF59 | Immunglobulin superfamily DCC subclass member 4 OS=Mus musculus OX10090 GN=Igdcc4 PE=1 Sv=1 - [IGDC4_MOUSE]                       | Igdcc4   | 16.73013314  | 0           | 0           | 17.40247314  | 13.20114669 | 15.65734174 | 0.1 | 0.84038627  | 1.636113956  | 1.613613956  |
| Q9CF86 | MOB-like protein phosphoinositide 3-kinase OS=Mus musculus OX10090 GN=Mob1 PE=1 Sv=1 - [PHOCN_MOUSE]                              | Mob1     | 54.48039885  | 0           | 0           | 38.98293888  | 46.72506211 | 22.94272827 | 0.1 | 0.84038627  | 1.652827744  | 1.614640957  |
| Q9W1U2 | Phenylalanine--RNA ligase beta subunit OS=Mus musculus OX10090 GN=Farb PE=1 Sv=2 - [SYFB_MOUSE]                                   | Farb     | 40.          |             |             |              |             |             |     |             |              |              |

|        |                                                                                                                      |          |              |   |             |             |             |             |             |             |              |             |             |             |             |             |             |
|--------|----------------------------------------------------------------------------------------------------------------------|----------|--------------|---|-------------|-------------|-------------|-------------|-------------|-------------|--------------|-------------|-------------|-------------|-------------|-------------|-------------|
| P48758 | Carbonyl reductase A4 OS=Mus musculus OX=10090 GN=Cbr1 PE=1 Sv=3 - [CBR1_MOUSE]                                      | Cbr1     | 104.063314   | 0 | 0           | 205.4465305 | 208.5022146 | 43.92574368 | 34.68777134 | 152.6308719 | 60.08098237  | 94.15365502 | 0.184038627 | 0.726530612 | 4.400134861 | 2.13754742  |             |
| Q91919 | Prostaglandin reductase 1 OS=Mus musculus OX=10090 GN=Ptgr1 PE=1 Sv=2 - [PTGR1_MOUSE]                                | Ptgr1    | 122.5314153  | 0 | 0           | 238.3587148 | 243.2265855 | 74.97175497 | 40.84380511 | 185.5100481 | 70.74354562  | 95.76767269 | 0.184038627 | 0.726530612 | 4.542158050 | 2.18337909  |             |
| Q89198 | Hepatocyte growth factor-regulated tyrosine kinase substrate OS=Mus musculus OX=10090 GN=Hgs PE=1 Sv=2 - [HGS_MOUSE] | Hgs      | 23.84504253  | 0 | 0           | 45.79991625 | 46.70262028 | 21.5036323  | 7.948348416 | 36.12634038 | 17.36694329  | 12.88193841 | 0.184038627 | 0.726530612 | 4.545137995 | 2.184324007 |             |
| P24472 | Glutathione S-transferase A4 OS=Mus musculus OX=10090 GN=Gsta4 PE=1 Sv=3 - [GSTA4_MOUSE]                             | Gsta4    | 222.6043369  | 0 | 0           | 371.7070991 | 469.9029225 | 186.1476562 | 74.20144653 | 342.9861899 | 128.206738   | 144.1017775 | 0.184038627 | 0.726530612 | 4.616974601 | 2.20694796  |             |
| Q9P050 | Peritremone carnitine O-octanoyltransferase OS=Mus musculus OX=10090 GN=Crot PE=1 Sv=1 - [COTC_MOUSE]                | Crot     | 36.41284561  | 0 | 0           | 74.65778761 | 79.45589002 | 30.02145577 | 13.1376152  | 61.8783778  | 22.75501704  | 27.2616556  | 0.184038627 | 0.726530612 | 4.617957341 | 2.22420727  |             |
| Q8816  | Isolecine--rRNA ligase, mitochondrial OS=Mus musculus OX=10090 GN=Iars2 PE=1 Sv=1 - [IYSM_MOUSE]                     | Iars2    | 10.90589449  | 0 | 0           | 17.26004957 | 26.65104174 | 5.543030777 | 3.636631496 | 17.15150676 | 6.29883019   | 11.55439068 | 0.184038627 | 0.726530612 | 4.76531715  | 2.237660723 |             |
| Q88F44 | WD repeat-containing protein 82 OS=Mus musculus OX=10090 GN=Wdr82 PE=1 Sv=1 - [WDR82_MOUSE]                          | Wdr82    | 30.2457347   | 0 | 0           | 43.3540554  | 83.86243635 | 18.51537813 | 10.08191157 | 48.57729067 | 17.46238307  | 32.9851666  | 0.184038627 | 0.726530612 | 4.818261929 | 2.265512823 |             |
| Q64404 | Sorbitol dehydrogenase OS=Mus musculus OX=10090 GN=Sord PE=1 Sv=3 - [DHSO_MOUSE]                                     | Sord     | 33.10122829  | 0 | 0           | 66.25054917 | 68.86691614 | 31.39991    | 11.03040943 | 55.50551937 | 19.05846419  | 20.91771844 | 0.184038627 | 0.726530612 | 5.044392866 | 2.334680623 |             |
| Q9D358 | Low molecular weight phosphotyrosine protein phosphatase OS=Mus musculus OX=10090 GN=Acpt1 PE=1 Sv=3 - [PP3A_MOUSE]  | Acpt1    | 70.73235998  | 0 | 0           | 156.1348957 | 175.8184195 | 27.79037496 | 25.45811999 | 119.9174967 | 40.63065568  | 80.38860997 | 0.184038627 | 0.726530612 | 5.11982407  | 2.35388287  |             |
| Q3UDE2 | Tubulin--tyrosine ligase-like protein 12 OS=Mus musculus OX=10090 GN=Ttl12 PE=1 Sv=1 - [TTL12_MOUSE]                 | Ttl12    | 47.42417209  | 0 | 0           | 96.06400893 | 125.8133814 | 26.63320022 | 15.80793227 | 62.64026682 | 27.37920382  | 50.63873542 | 0.184038627 | 0.726530612 | 5.227947383 | 2.386244621 |             |
| Q88420 | Isolecine--rRNA ligase, cytoplasmic OS=Mus musculus OX=10090 GN=Iars1 PE=1 Sv=2 - [SVC_MOUSE]                        | Iars1    | 28.79383184  | 0 | 0           | 81.194342   | 76.6474978  | 4.82356626  | 5.997793945 | 55.10805947 | 16.62386675  | 40.4741775  | 0.184038627 | 0.726530612 | 5.741742299 | 2.521488581 |             |
| Q8K4Z5 | Splicing factor 3A subunit 1 OS=Mus musculus OX=10090 GN=SF3a1 PE=1 Sv=1 - [SF3A1_MOUSE]                             | Sf3a1    | 62.98835296  | 0 | 0           | 167.6539631 | 176.4839149 | 19.64002361 | 20.99611765 | 121.2591988 | 36.36634254  | 88.11547071 | 0.184038627 | 0.726530612 | 5.75315268  | 2.529989704 |             |
| Q80V70 | Multiple epidermal growth factor-like domain protein 6 OS=Mus musculus OX=10090 GN=Megf6 PE=2 Sv=3 - [MEGF6_MOUSE]   | Megf6    | 6.122320475  | 0 | 0           | 3.595316007 | 35.00778717 | 7.039340224 | 2.304076825 | 15.21144775 | 3.990778125  | 17.22807134 | 0.184038627 | 0.726530612 | 6.463142561 | 2.723057794 |             |
| P97823 | Acyl-protein thioesterase 1 OS=Mus musculus OX=10090 GN=Lyp1a1 PE=1 Sv=1 - [LypA1_MOUSE]                             | Lyp1a1   | 26.12655505  | 0 | 0           | 80.75568959 | 93.7138985  | 14.62397143 | 8.708951685 | 65.03697668 | 15.08434668  | 44.67800906 | 0.184038627 | 0.726530612 | 7.607480691 | 2.900689219 |             |
| Q8K354 | Carbonyl reductase [NADPH] 3 OS=Mus musculus OX=10090 GN=Cbr3 PE=1 Sv=1 - [CBR3_MOUSE]                               | Cbr3     | 38.506163288 | 0 | 0           | 201.6346714 | 221.7628476 | 36.11640302 | 19.35387763 | 153.1713074 | 33.521189937 | 101.8708685 | 0.184038627 | 0.726530612 | 7.914234869 | 2.984451521 |             |
| A2A432 | Cullin-4B OS=Mus musculus OX=10090 GN=Cul4B PE=1 Sv=1 - [CUL4B_MOUSE]                                                | Cul4b    | 0            | 0 | 31.02930665 | 48.47986942 | 0           | 0           | 26.50305869 | 0           | 24.55482896  | 0.196750502 | 0.726530612 | only in a1H | only in a1H | only in a1H |             |
| A2A690 | Protein TANC2 OS=Mus musculus OX=10090 GN=Tanc2 PE=1 Sv=1 - [TANC2_MOUSE]                                            | Tanc2    | 0            | 0 | 839.0525133 | 0           | 1647.540647 | 0           | 828.8643641 | 0           | 823.815735   | 0.196750502 | 0.726530612 | only in a1H | only in a1H | only in a1H |             |
| A2AAV5 | SH3 and PX domain-containing protein 2B OS=Mus musculus OX=10090 GN=Sh3pdx2b PE=1 Sv=1 - [SPD2B_MOUSE]               | Sh3pdx2b | 0            | 0 | 0           | 0           | 33.7252391  | 0           | 17.82130495 | 0           | 16.94417809  | 0.196750502 | 0.726530612 | only in a1H | only in a1H | only in a1H |             |
| EQ9555 | E3 ubiquitin-protein ligase RNF213 OS=Mus musculus OX=10090 GN=Rnf213 PE=1 Sv=2 - [RN213_MOUSE]                      | Rnf213   | 0            | 0 | 45.38328499 | 10.15159574 | 0           | 0           | 18.51174748 | 0           | 23.81858951  | 0.196750502 | 0.726530612 | only in a1H | only in a1H | only in a1H |             |
| Q80739 | AMP deaminase 3 OS=Mus musculus OX=10090 GN=Ampd3 PE=1 Sv=2 - [AMPD3_MOUSE]                                          | Ampd3    | 0            | 0 | 13.44412068 | 12.41195596 | 0           | 0           | 8.61772078  | 0           | 7.480887159  | 0.196750502 | 0.726530612 | only in a1H | only in a1H | only in a1H |             |
| Q80756 | 3-hydroxyacyl-CoA dehydrogenase type-2 OS=Mus musculus OX=10090 GN=Hsd17b10 PE=1 Sv=4 - [HCD_MOUSE]                  | Hsd17b10 | 0            | 0 | 20.61231564 | 20.1723355  | 0           | 0           | 12.9125564  | 0           | 11.2537787   | 0.196750502 | 0.726530612 | only in a1H | only in a1H | only in a1H |             |
| Q80832 | Polypeptide N-acetylgalactosaminyltransferase 4 OS=Mus musculus OX=10090 GN=Galnt4 PE=1 Sv=1 - [GALT4_MOUSE]         | Galnt4   | 0            | 0 | 22.09565393 | 20.3180891  | 0           | 0           | 17.66948761 | 0           | 15.92462401  | 0.196750502 | 0.726530612 | only in a1H | only in a1H | only in a1H |             |
| Q53295 | Transcriptional activator protein Pur-beta OS=Mus musculus OX=10090 GN=Purb PE=1 Sv=3 - [PURB_MOUSE]                 | Purb     | 0            | 0 | 39.1119955  | 46.4834507  | 0           | 0           | 28.53181356 | 0           | 24.98265109  | 0.196750502 | 0.726530612 | only in a1H | only in a1H | only in a1H |             |
| OS4950 | 5'-AMP-activated protein kinase subunit gamma-1 OS=Mus musculus OX=10090 GN=Prkaag1 PE=1 Sv=2 - [AAKG1_MOUSE]        | Prkaag1  | 0            | 0 | 17.30247148 | 3.77086189  | 0           | 0           | 7.024443889 | 0           | 9.098529276  | 0.196750502 | 0.726530612 | only in a1H | only in a1H | only in a1H |             |
| Q85887 | ACEH-O-methyltransferase OS=Mus musculus OX=10090 GN=Comt PE=1 Sv=2 - [COMT_MOUSE]                                   | Comt     | 0            | 0 | 27.4530615  | 31.38611422 | 0           | 0           | 19.61305857 | 0           | 17.09886768  | 0.196750502 | 0.726530612 | only in a1H | only in a1H | only in a1H |             |
| Q88746 | Target of Myb protein 1 OS=Mus musculus OX=10090 GN=Tom1 PE=1 Sv=1 - [TOM1_MOUSE]                                    | Tom1     | 0            | 0 | 8.465655165 | 11.50732286 | 0           | 0           | 6.657659342 | 0           | 5.96296791   | 0.196750502 | 0.726530612 | only in a1H | only in a1H | only in a1H |             |
| Q90230 | Alcohol dehydrogenase 1 OS=Mus musculus OX=10090 GN=Adh1 PE=1 Sv=2 - [ADH1_MOUSE]                                    | Adh1     | 0            | 0 | 70.86913578 | 0           | 25.51931874 | 0           | 32.12948484 | 0           | 35.89400122  | 0.196750502 | 0.726530612 | only in a1H | only in a1H | only in a1H |             |
| P01899 | H-2 class I histocompatibility antigen, D-B alpha chain OS=Mus musculus OX=10090 GN=H2-D1 PE=1 Sv=2 - [HA11_MOUSE]   | H2-D1    | 0            | 0 | 196.579258  | 41.37883964 | 0           | 0           | 79.31936587 | 0           | 103.636209   | 0.196750502 | 0.726530612 | only in a1H | only in a1H | only in a1H |             |
| P05132 | cAMP-dependent protein kinase catalytic subunit alpha OS=Mus musculus OX=10090 GN=Prkaca PE=1 Sv=3 - [PRACA_MOUSE]   | Prkaca   | 0            | 0 | 19.51048111 | 0           | 19.67091507 | 0           | 13.0646542  | 0           | 11.31097929  | 0.196750502 | 0.726530612 | only in a1H | only in a1H | only in a1H |             |
| P09030 | Adenine phosphoribosyltransferase OS=Mus musculus OX=10090 GN=Aprt PE=1 Sv=2 - [APT_MOUSE]                           | Aprt     | 0            | 0 | 18.83417839 | 20.96273234 | 0           | 0           | 13.26520204 | 0           | 11.53571278  | 0.196750502 | 0.726530612 | only in a1H | only in a1H | only in a1H |             |
| R02807 | Protein S100-A10 OS=Mus musculus OX=10090 GN=S100a10 PE=1 Sv=2 - [S10A_MOUSE]                                        | S100a10  | 0            | 0 | 115.2697742 | 141.8510686 | 0           | 0           | 85.76994262 | 0           | 75.4049196   | 0.196750502 | 0.726530612 | only in a1H | only in a1H | only in a1H |             |
| P09602 | Non-histone chromosomal protein HMG-17 OS=Mus musculus OX=10090 GN=Hmg2 PE=1 Sv=2 - [HMG2_MOUSE]                     | Hmg2     | 0            | 0 | 30.89009897 | 42.78967446 | 0           | 0           | 24.55994248 | 0           | 22.08620255  | 0.196750502 | 0.726530612 | only in a1H | only in a1H | only in a1H |             |
| P14426 | H-2 class I histocompatibility antigen, D-K alpha chain OS=Mus musculus OX=10090 GN=H2-D1 PE=1 Sv=1 - [HA13_MOUSE]   | H2-D1    | 0            | 0 | 157.4296861 | 66.2091267  | 0           | 0           | 74.75020028 | 0           | 79.01380688  | 0.196750502 | 0.726530612 | only in a1H | only in a1H | only in a1H |             |
| P14430 | H-2 class I histocompatibility antigen, Q8 alpha chain OS=Mus musculus OX=10090 GN=H2-Q8 PE=3 Sv=1 - [HA18_MOUSE]    | H2-Q8    | 0            | 0 | 157.6167756 | 67.28092523 | 0           | 0           | 74.96922277 | 0           | 79.08842869  | 0.196750502 | 0.726530612 | only in a1H | only in a1H | only in a1H |             |
| P19001 | Keratin, type I cytoskeletal 19 OS=Mus musculus OX=10090 GN=Krt19 PE=1 Sv=1 - [K1C19_MOUSE]                          | Krt19    | 0            | 0 | 94.41071504 | 114.1167582 | 0           | 0           | 69.50515715 | 0           | 60.99774006  | 0.196750502 | 0.726530612 | only in a1H | only in a1H | only in a1H |             |
| P21216 | Ubiquitin-like protein 4A OS=Mus musculus OX=10090 GN=Ubl4a PE=1 Sv=1 - [UBL4A_MOUSE]                                | Ubl4a    | 0            | 0 | 0           | 33.95714882 | 11.7815165  | 0           | 0           | 23.92517076 | 0            | 17.2480725  | 0.196750502 | 0.726530612 | only in a1H | only in a1H | only in a1H |
| P30285 | Cyclin-dependent kinase 1 OS=Mus musculus OX=10090 GN=Cdk4 PE=1 Sv=1 - [CDK4_MOUSE]                                  | Cdk4     | 0            | 0 | 62.49007372 | 104.5032467 | 0           | 0           | 54.5977728  | 0           | 51.11069588  | 0.196750502 | 0.726530612 | only in a1H | only in a1H | only in a1H |             |
| P32020 | Sterol carrier protein 3 OS=Mus musculus OX=10090 GN=Scp3 PE=1 Sv=3 - [SCP3_MOUSE]                                   | Scp3     | 0            | 0 | 21.17287737 | 5.03497057  | 0           | 0           | 15.3524809  | 0           | 11.08140919  | 0.196750502 | 0.726530612 | only in a1H | only in a1H | only in a1H |             |
| P45377 | Aldehyde reductase-related protein 2 OS=Mus musculus OX=10090 GN=Akr1b OS=1 Sv=2 - [ALD2_MOUSE]                      | Akr1b    | 0            | 0 | 29.5345895  | 17.23730282 | 0           | 0           | 15.95027058 | 0           | 14.83597704  | 0.196750502 | 0.726530612 | only in a1H | only in a1H | only in a1H |             |
| P49138 | MAP kinase-activated protein kinase 2 OS=Mus musculus OX=10090 GN=Mapkapk2 PE=1 Sv=2 - [MAPK2_MOUSE]                 | Mapkapk2 | 0            | 0 | 21.74998458 | 20.50249119 | 0           | 0           | 14.11414559 | 0           | 12.23690134  | 0.196750502 | 0.726530612 | only in a1H | only in a1H | only in a1H |             |
| P49717 | DNA replication licensing factor MCM4 OS=Mus musculus OX=10090 GN=Mcm4 PE=1 Sv=1 - [MCM4_MOUSE]                      | Mcm4     | 0            | 0 | 5.918075827 | 10.77346928 | 0           | 0           | 5.563848368 | 0           | 5.395462713  | 0.196750502 | 0.726530612 | only in a1H | only in a1H | only in a1H |             |
| P54818 | Galactocerebrosidase OS=Mus musculus OX=10090 GN=Galc PE=1 Sv=2 - [GALC_MOUSE]                                       | Galc     | 0            | 0 | 19.66505453 | 12.55271995 | 0           | 0           | 17.90329516 | 0           | 9.957162002  | 0.196750502 | 0.726530612 | only in a1H | only in a1H | only in a1H |             |
| P57784 | U2 small nuclear ribonucleoprotein A' OS=Mus musculus OX=10090 GN=Snraa1 PE=1 Sv=2 - [RU2A_MOUSE]                    | Snraa1   | 0            | 0 | 14.24080557 | 24.52631623 | 0           | 0           | 12.92237394 | 0           | 12.31619842  | 0.196750502 | 0.726530612 | only in a1H | only in a1H | only in a1H |             |
| P60762 | Mortality factor 4-like protein 1 OS=Mus musculus OX=10090 GN=Morf4l1 PE=1 Sv=2 - [MO4L1_MOUSE]                      | Morf4l1  | 0            | 0 | 19.13312613 | 17.94223205 | 0           | 0           | 12.41844978 | 0           | 10.77651452  | 0.196750502 | 0.726530612 | only in a1H | only in a1H | only in a1H |             |
| P61028 | Ras-related protein Rab-8B OS=Mus musculus OX=10090 GN=Rab8b PE=1 Sv=1 - [RAB8B_MOUSE]                               | Rab8b    | 0            | 0 | 30.10447886 | 339.2002185 | 0           | 0           | 21.31450224 | 0           | 185.3048214  | 0.196750502 | 0.726530612 | only in a1H | only in a1H | only in a1H |             |
| P62077 | Mitochondrial import inner membrane translocator OS=Mus musculus OX=10090 GN=Timm8b PE=1 Sv=1 - [TIMB8_MOUSE]        | Timm8b   | 0            | 0 | 16.64881261 | 0           | 16.77834265 | 0           | 11.2151475  | 0           | 6.645080237  | 0.196750502 | 0.726530612 | only in a1H | only in a1H | only in a1H |             |
| P67984 | 60S ribosomal protein L22 OS=Mus musculus OX=10090 GN=L22 PE=1 Sv=2 - [RL22_MOUSE]                                   | Rpl22    | 0            | 0 | 30.96281323 | 26.6422446  | 0           | 0           | 19.25301838 | 0           | 16.79115108  | 0.196750502 | 0.726530612 | only in a1H | only in a1H | only in a1H |             |
| P70398 | Protein ubiquitin carboxyl-terminal hydrolase FA-X OS=Mus musculus OX=10090 GN=Usp9x PE=1 Sv=2 - [USP9X_MOUSE]       | Usp9x    | 0            | 0 | 36.15153555 | 26.00565546 | 0           | 0           | 20.719067   | 0           | 18.64656733  | 0.196750502 | 0.726530612 | only in a1H | only in a1H | only in a1H |             |
| P7     |                                                                                                                      |          |              |   |             |             |             |             |             |             |              |             |             |             |             |             |             |

|        |                                                                                                                            |          |             |             |             |   |              |             |             |             |             |             |             |             |             |             |             |
|--------|----------------------------------------------------------------------------------------------------------------------------|----------|-------------|-------------|-------------|---|--------------|-------------|-------------|-------------|-------------|-------------|-------------|-------------|-------------|-------------|-------------|
| Q8CHH3 | Plexin-B1 OS=Mus musculus OX=10090 GN=Plxb1 PE=1 Sv=2 - [PLXB1_MOUSE]                                                      | Pplx1    | 0           | 0           | 0           | 0 | 22.90728937  | 40.57322101 | 0           | 21.16017013 | 0           | 20.34295664 | 0.19670502  | 0.726530612 | only in a1H | only in a1H |             |
| Q8K114 | Integrator complex subunit 9 OS=Mus musculus OX=10090 GN=Int9 PE=1 Sv=1 - [INT9_MOUSE]                                     | Int9     | 0           | 0           | 0           | 0 | 7.845687152  | 11.97794488 | 0           | 6.607877345 | 0           | 6.084153248 | 0.19670502  | 0.726530612 | only in a1H | only in a1H |             |
| Q8R1F1 | Protein Niban 2 OS=Mus musculus OX=10090 GN=Niban2 PE=1 Sv=2 - [NIBA2_MOUSE]                                               | Niban2   | 0           | 0           | 0           | 0 | 10.73559111  | 26.6033364  | 0           | 12.44631184 | 0           | 13.38391372 | 0.19670502  | 0.726530612 | only in a1H | only in a1H |             |
| Q8R574 | Phosphoribosyl pyrophosphate synthase-associated protein 2 OS=Mus musculus OX=10090 GN=Prpsap2 PE=1 Sv=1 - [KPRB_MOUSE]    | Prpsap2  | 0           | 0           | 0           | 0 | 28.11624968  | 24.30040399 | 0           | 17.47221759 | 0           | 15.25119543 | 0.19670502  | 0.726530612 | only in a1H | only in a1H |             |
| Q8R577 | Interferon-induced helicase C domain-containing protein 1 OS=Mus musculus OX=10090 GN=Ifih1 PE=1 Sv=1 - [IFIH1_MOUSE]      | Ifih1    | 0           | 0           | 0           | 0 | 23.15462496  | 11.29106259 | 0           | 11.48189918 | 0           | 11.57849705 | 0.19670502  | 0.726530612 | only in a1H | only in a1H |             |
| Q8V233 | Ganglioside-induced differentiator-associated protein 1 like 1 OS=Mus musculus OX=10090 GN=Gdgp11 PE=1 Sv=1 - [GD11_MOUSE] | Gdgp11   | 0           | 0           | 0           | 0 | 16.47210867  | 0           | 0           | 8.29592175  | 0           | 8.236707064 | 0.19670502  | 0.726530612 | only in a1H | only in a1H |             |
| Q8V147 | ATP-binding cassette sub-family C member 2 OS=Mus musculus OX=10090 GN=Abcc2 PE=1 Sv=2 - [IMRP2_MOUSE]                     | Abcc2    | 0           | 0           | 0           | 0 | 33.16191858  | 25.87767722 | 0           | 15.67956377 | 0           | 17.42791612 | 0.19670502  | 0.726530612 | only in a1H | only in a1H |             |
| Q8V175 | Importin-4 OS=Mus musculus OX=10090 GN=Ipo4 PE=1 Sv=1 - [IPO4_MOUSE]                                                       | Ipo4     | 0           | 0           | 0           | 0 | 8.30284887   | 9.826594588 | 0           | 6.04314782  | 0           | 5.288638856 | 0.19670502  | 0.726530612 | only in a1H | only in a1H |             |
| Q91VH6 | Protein MEMO1 OS=Mus musculus OX=10090 GN=Memo1 PE=1 Sv=1 - [MEMO1_MOUSE]                                                  | Memo1    | 0           | 0           | 0           | 0 | 38.49159147  | 48.94190363 | 0           | 29.14449836 | 0           | 25.77505761 | 0.19670502  | 0.726530612 | only in a1H | only in a1H |             |
| Q91W82 | Ubiquitin-conjugating enzyme E2 OS=Mus musculus OX=10090 GN=Ube2e2 PE=2 Sv=1 - [UB2E2_MOUSE]                               | Ube2e2   | 0           | 0           | 0           | 0 | 40.58388051  | 6.348035533 | 0           | 15.64397201 | 0           | 21.83056723 | 0.19670502  | 0.726530612 | only in a1H | only in a1H |             |
| Q91XQ0 | Dynein heavy chain 8, axonemal OS=Mus musculus OX=10090 GN=Dnah8 PE=1 Sv=2 - [DHR8_MOUSE]                                  | Dnah8    | 0           | 0           | 0           | 0 | 25.19332020  | 12.94515084 | 0           | 12.71349431 | 0           | 12.59926634 | 0.19670502  | 0.726530612 | only in a1H | only in a1H |             |
| Q9219  | Exosome complex component RRP41 OS=Mus musculus OX=10090 GN=Exok4 PE=1 Sv=3 - [EXO4_MOUSE]                                 | Exok4    | 0           | 0           | 0           | 0 | 25.15861026  | 41.85626793 | 0           | 22.33827273 | 0           | 21.07015101 | 0.19670502  | 0.726530612 | only in a1H | only in a1H |             |
| Q92511 | ATPase family AAA domain-containing protein 3 OS=Mus musculus OX=10090 GN=Atad3 PE=1 Sv=1 - [ATA3_MOUSE]                   | Atad3    | 0           | 0           | 0           | 0 | 14.27696276  | 12.56366064 | 0           | 9.946854666 | 0           | 7.795420007 | 0.19670502  | 0.726530612 | only in a1H | only in a1H |             |
| Q92999 | 3-mercaptopyruvate sulfurtransferase OS=Mus musculus OX=10090 GN=Mpt1 PE=1 Sv=4 - [TMT_MOUSE]                              | Mpt1     | 0           | 0           | 0           | 0 | 15.0841878   | 10.27340022 | 0           | 6.92691466  | 0           | 6.000494609 | 0.19670502  | 0.726530612 | only in a1H | only in a1H |             |
| Q93R83 | Endoribonuclease LACTB2 OS=Mus musculus OX=10090 GN=Lactb2 PE=1 Sv=1 - [LACB2_MOUSE]                                       | Lactb2   | 0           | 0           | 0           | 0 | 24.13749176  | 26.64564129 | 0           | 16.92751002 | 0           | 14.71333005 | 0.19670502  | 0.726530612 | only in a1H | only in a1H |             |
| Q99L62 | Transportin-2 OS=Mus musculus OX=10090 GN=Tnp2 PE=1 Sv=1 - [TNP2_MOUSE]                                                    | Tnp2     | 0           | 0           | 0           | 0 | 11.54195617  | 0           | 0.038622342 | 0           | 5.860192838 | 0           | 5.773046499 | 0.19670502  | 0.726530612 | only in a1H | only in a1H |
| Q99N28 | Cell adhesion molecule 3 OS=Mus musculus OX=10090 GN=Cadm3 PE=1 Sv=1 - [CADM3_MOUSE]                                       | Cadm3    | 0           | 0           | 0           | 0 | 55.01004698  | 26.27683833 | 0           | 27.09562844 | 0           | 27.51416236 | 0.19670502  | 0.726530612 | only in a1H | only in a1H |             |
| Q99PV0 | Pre-mRNA-processing-splicing factor 8 OS=Mus musculus OX=10090 GN=Prpf8 PE=1 Sv=2 - [PRP8_MOUSE]                           | Prpf8    | 0           | 0           | 0           | 0 | 79.24717191  | 47.38327629 | 0           | 42.2101494  | 0           | 39.87605165 | 0.19670502  | 0.726530612 | only in a1H | only in a1H |             |
| Q9CF73 | N-acyleuraminatase OS=Mus musculus OX=10090 GN=Nanp PE=1 Sv=1 - [NANP_MOUSE]                                               | Nanp     | 0           | 0           | 0           | 0 | 32.44144897  | 41.03392056 | 0           | 24.49178984 | 0           | 21.64124464 | 0.19670502  | 0.726530612 | only in a1H | only in a1H |             |
| Q9CQC6 | Basic leucine zipper and W2 domain-containing protein 1 OS=Mus musculus OX=10090 GN=Bzwl1 PE=1 Sv=1 - [BZW1_MOUSE]         | Bzwl1    | 0           | 0           | 0           | 0 | 19.96011618  | 29.47964785 | 0           | 16.47992134 | 0           | 15.04480729 | 0.19670502  | 0.726530612 | only in a1H | only in a1H |             |
| Q9CQ08 | U6 snRNA-associated Sm-like protein Lsm7 OS=Mus musculus OX=10090 GN=Lsm7 PE=1 Sv=1 - [LSM7_MOUSE]                         | Lsm7     | 0           | 0           | 0           | 0 | 9.714769599  | 13.14890077 | 0           | 7.620953222 | 0           | 6.819594945 | 0.19670502  | 0.726530612 | only in a1H | only in a1H |             |
| Q9CQ06 | Serine/threonine-protein phosphatase 6 catalytic subunit OS=Mus musculus OX=10090 GN=Ppp6c PE=1 Sv=1 - [PPP6_MOUSE]        | Ppp6c    | 0           | 0           | 0           | 0 | 27.16374674  | 17.73829892 | 0           | 14.96682619 | 0           | 13.7913567  | 0.19670502  | 0.726530612 | only in a1H | only in a1H |             |
| Q9CQV6 | Microtubule-associated proteins 1A/1B light chain 3B OS=Mus musculus OX=10090 GN=Map1l3b PE=1 Sv=3 - [MLP3B_MOUSE]         | Map1l3b  | 0           | 0           | 0           | 0 | 101.58090833 | 78.08501033 | 0           | 59.89435621 | 0           | 53.18657445 | 0.19670502  | 0.726530612 | only in a1H | only in a1H |             |
| Q9CQAS | Golgi phosphoprotein 3 OS=Mus musculus OX=10090 GN=Golph3 PE=1 Sv=1 - [GOLP3_MOUSE]                                        | Golph3   | 0           | 0           | 0           | 0 | 11.39219350  | 13.81617882 | 0           | 8.22464623  | 0           | 7.185114492 | 0.19670502  | 0.726530612 | only in a1H | only in a1H |             |
| Q9CSN1 | SNW domain-containing protein 1 OS=Mus musculus OX=10090 GN=Snw1 PE=1 Sv=3 - [SNW1_MOUSE]                                  | Snw1     | 0           | 0           | 0           | 0 | 23.1738896   | 18.46636581 | 0           | 13.88007285 | 0           | 12.24877854 | 0.19670502  | 0.726530612 | only in a1H | only in a1H |             |
| Q9CY22 | Tumor protein D54 OS=Mus musculus OX=10090 GN=Tpd52 PE=1 Sv=1 - [TPD52_MOUSE]                                              | Tpd52    | 0           | 0           | 0           | 0 | 64.04456977  | 67.01108526 | 0           | 43.68521835 | 0           | 37.86517393 | 0.19670502  | 0.726530612 | only in a1H | only in a1H |             |
| Q9D071 | MMS19 nucleotide excision repair protein homolog OS=Mus musculus OX=10090 GN=Mms19 PE=1 Sv=1 - [MMS19_MOUSE]               | Mms19    | 0           | 0           | 0           | 0 | 8.12494996   | 8.504224644 | 0           | 5.54305808  | 0           | 4.804173399 | 0.19670502  | 0.726530612 | only in a1H | only in a1H |             |
| Q9D1AC | Vascular protein sorting-associated protein 28 homolog OS=Mus musculus OX=10090 GN=Vps28 PE=1 Sv=1 - [VPS28_MOUSE]         | Vps28    | 0           | 0           | 0           | 0 | 28.09951535  | 0           | 9.508030137 | 0           | 12.5384849  | 0           | 14.29235648 | 0.19670502  | 0.726530612 | only in a1H | only in a1H |
| Q9D711 | Perin OS=Mus musculus OX=10090 GN=Pr PE=1 Sv=1 - [PR_MOUSE]                                                                | Pr       | 0           | 0           | 0           | 0 | 19.80682089  | 15.62556995 | 0           | 11.81079261 | 0           | 10.43991616 | 0.19670502  | 0.726530612 | only in a1H | only in a1H |             |
| Q9D975 | Sulfiredoxin-1 OS=Mus musculus OX=10090 GN=Srxn1 PE=2 Sv=1 - [SRXN1_MOUSE]                                                 | Srxn1    | 0           | 0           | 0           | 0 | 30.29619584  | 46.9109445  | 0           | 25.7355301  | 0           | 23.78541635 | 0.19670502  | 0.726530612 | only in a1H | only in a1H |             |
| Q9D983 | Malignant T cell-specific sequence 1 OS=Mus musculus OX=10090 GN=Mctc1 PE=1 Sv=1 - [MCTC1_MOUSE]                           | Mctc1    | 0           | 0           | 0           | 0 | 18.53439016  | 20.56161773 | 0           | 13.0338096  | 0           | 11.31329978 | 0.19670502  | 0.726530612 | only in a1H | only in a1H |             |
| Q9ER81 | Torsin-1A-interacting protein 2, isoform IFRG15 OS=Mus musculus OX=10090 GN=Tor1aip2 PE=1 Sv=1 - [IFG15_MOUSE]             | Tor1aip2 | 0           | 0           | 0           | 0 | 14.29484975  | 11.45920307 | 0           | 8.584685039 | 0           | 7.568542309 | 0.19670502  | 0.726530612 | only in a1H | only in a1H |             |
| Q9JH0  | Matrix metalloproteinase-19 OS=Mus musculus OX=10090 GN=Mmp19 PE=2 Sv=1 - [MMP19_MOUSE]                                    | Mmp19    | 0           | 0           | 0           | 0 | 17.79522684  | 6.441925051 | 0           | 8.079056029 | 0           | 9.009864574 | 0.19670502  | 0.726530612 | only in a1H | only in a1H |             |
| Q9JH59 | Spliceosome-associated protein CWC15 homolog OS=Mus musculus OX=10090 GN=Cwc15 PE=1 Sv=1 - [CWC15_MOUSE]                   | Cwc15    | 0           | 0           | 0           | 0 | 3.186225916  | 6.361381081 | 0           | 3.18254675  | 0           | 3.180692166 | 0.19670502  | 0.726530612 | only in a1H | only in a1H |             |
| Q9JH92 | Nuclear pore complex protein Nup50 OS=Mus musculus OX=10090 GN=Nup50 PE=1 Sv=3 - [NUP50_MOUSE]                             | Nup50    | 0           | 0           | 0           | 0 | 7.391087649  | 10.08925104 | 0           | 5.826779564 | 0           | 5.223364959 | 0.19670502  | 0.726530612 | only in a1H | only in a1H |             |
| Q9JK7  | Tropomodulin-2 OS=Mus musculus OX=10090 GN=Tmod2 PE=1 Sv=2 - [TMOD2_MOUSE]                                                 | Tmod2    | 0           | 0           | 0           | 0 | 61.40186253  | 65.57300714 | 0           | 42.65828989 | 0           | 37.03353151 | 0.19670502  | 0.726530612 | only in a1H | only in a1H |             |
| Q9JH8  | Squamous cell carcinoma antigen recognized by T-cells 3 OS=Mus musculus OX=10090 GN=Sart3 PE=1 Sv=1 - [SART3_MOUSE]        | Sart3    | 0           | 0           | 0           | 0 | 65.16032115  | 18.56474353 | 0           | 27.8083856  | 0           | 33.5699992  | 0.19670502  | 0.726530612 | only in a1H | only in a1H |             |
| Q9JQD0 | Glutaredoxin-1 OS=Mus musculus OX=10090 GN=Glxr PE=1 Sv=3 - [GLXR_MOUSE]                                                   | Glxr     | 0           | 0           | 0           | 0 | 65.57792928  | 62.96039499 | 0           | 46.98295822 | 0           | 36.96770014 | 0.19670502  | 0.726530612 | only in a1H | only in a1H |             |
| Q9KQV5 | Guanine nucleotide-binding protein Gs alpha-3 PE=1 Sv=2 - [AGD_MOUSE]                                                      | Adg3     | 0           | 0           | 0           | 0 | 46.98295822  | 0           | 0           | 23.13771629 | 0           | 23.49970305 | 0.19670502  | 0.726530612 | only in a1H | only in a1H |             |
| Q9QZ08 | Core histone macro-H2A.1 OS=Mus musculus OX=10090 GN=Macroh2a1 PE=1 Sv=3 - [H2AY_MOUSE]                                    | Macroh2a | 0           | 0           | 0           | 0 | 3.903316792  | 1.301105597 | 0           | 1.734807463 | 0           | 1.987471629 | 0.19670502  | 0.726530612 | only in a1H | only in a1H |             |
| Q9R069 | Basal cell adhesion molecule 5 OS=Mus musculus OX=10090 GN=Bcam PE=1 Sv=1 - [BCAM_MOUSE]                                   | Bcam     | 0           | 0           | 0           | 0 | 5.617650249  | 4.014534552 | 0           | 3.21078267  | 0           | 2.893799749 | 0.19670502  | 0.726530612 | only in a1H | only in a1H |             |
| Q9WU84 | Dynactin subunit 6 OS=Mus musculus OX=10090 GN=Dctn6 PE=1 Sv=1 - [DCTN6_MOUSE]                                             | Dctn6    | 0           | 0           | 0           | 0 | 15.95588915  | 19.94960222 | 0           | 11.68349497 | 0           | 10.23918995 | 0.19670502  | 0.726530612 | only in a1H | only in a1H |             |
| Q9Z0E6 | Guanylate-binding protein 2 OS=Mus musculus OX=10090 GN=Gbp2 PE=1 Sv=1 - [GBP2_MOUSE]                                      | Gbp2     | 0           | 0           | 0           | 0 | 320.2940588  | 74.44193926 | 0           | 131.578666  | 0           | 167.6171984 | 0.19670502  | 0.726530612 | only in a1H | only in a1H |             |
| Q9Z0V1 | Dynactin subunit 3 OS=Mus musculus OX=10090 GN=Dctn3 PE=1 Sv=2 - [DCTN3_MOUSE]                                             | Dctn3    | 0           | 0           | 0           | 0 | 18.45411592  | 5.089607016 | 0           | 7.847907645 | 0           | 9.531252036 | 0.19670502  | 0.726530612 | only in a1H | only in a1H |             |
| Q9Z0Z4 | Hephaestin OS=Mus musculus OX=10090 GN=Heph PE=1 Sv=3 - [HEPH_MOUSE]                                                       | Heph     | 0           | 0           | 0           | 0 | 116.5035173  | 349.5105519 | 0           | 153.33802   | 0           | 177.9620622 | 0.19670502  | 0.726530612 | only in a1H | only in a1H |             |
| Q9Z1K5 | E3 ubiquitin-protein ligase ARH1 OS=Mus musculus OX=10090 GN=Arh1 PE=1 Sv=3 - [ARH1_MOUSE]                                 | Arh1     | 0           | 0           | 0           | 0 | 21.73888462  | 21.35357265 | 0           | 14.36415242 | 0           | 12.44121266 | 0.19670502  | 0.726530612 | only in a1H | only in a1H |             |
| Q9Z1T1 | AP-3 complex subunit beta-1 OS=Mus musculus OX=10090 GN=Ap3b1 PE=1 Sv=2 - [AP3B1_MOUSE]                                    | Ap3b1    | 0           | 0           | 0           | 0 | 64.3133337   | 70.01681345 | 0           | 44.82198507 | 0           | 37.02789705 | 0.19670502  | 0.726530612 | only in a1H | only in a1H |             |
| Q9Z2D1 | Myotubularin-related protein 2 OS=Mus musculus OX=10090 GN=Mtrr2 PE=1 Sv=3 - [MTRR2_MOUSE]                                 | Mtrr2    | 0           | 0           | 0           | 0 | 7.671165005  | 10.13284602 | 0           | 5.934687042 | 0           | 5.284802804 | 0.19670502  | 0.726530612 | only in a1H | only in a1H |             |
| Q9Z2M7 | Phosphomannomutase 2 OS=Mus musculus OX=10090 GN=Pmm2 PE=1 Sv=1 - [PMM2_MOUSE]                                             | Pmm2     | 0           | 0           | 0           | 0 | 70.89302376  | 61.47017941 | 0           | 44.11210772 | 0           | 38.49933716 | 0.19670502  | 0.726530612 | only in a1H | only in a1H |             |
| P01831 | Thy-1 membrane glycoprotein OS=Mus musculus OX=10090 GN=Thy1 PE=1 Sv=1 - [THY1_MOUSE]                                      | Thy1     | 88.31637982 | 0           | 51.59235143 | 0 | 0            | 0           | 0           | 46.3624375  | 0           | 44.36629338 | 0.19670502  | 0.726530612 | only in mck | only in mck |             |
| P30115 | Glutathione S-transferase A3 OS=Mus musculus OX=10090 GN=Gsta3 PE=1 Sv=2 - [GSTA3_MOUSE]                                   | Gsta3    | 0           | 82.16942681 | 78.81031765 | 0 | 0            | 0           | 0           | 53.65991482 | 0           | 46.50119082 | 0.19670502  | 0.726530612 | only in mck | only in mck |             |
| P55302 | Alpha-2-macroglobulin receptor-associated protein OS=Mus musculus OX=10090 GN=Lrpap1 PE=1 Sv=1 - [AMRP_MOUSE]              | Lrpap1   | 0           | 45.73708355 | 45.97305179 | 0 | 0            | 0           | 0           | 30.57004511 | 0           | 26.47469856 | 0.19670502  | 0.726530612 | only in mck | only in mck |             |
| S8021  | Transmembrane 9 superfamily member 2 OS=Mus musculus OX=10090 GN=Tms9f2 PE=1 Sv=1 - [TMS9F2_MOUSE]                         | Tms9f2   |             |             |             |   |              |             |             |             |             |             |             |             |             |             |             |

|        |                                                                                                                   |         |              |             |             |             |              |             |             |              |              |             |             |             |              |              |
|--------|-------------------------------------------------------------------------------------------------------------------|---------|--------------|-------------|-------------|-------------|--------------|-------------|-------------|--------------|--------------|-------------|-------------|-------------|--------------|--------------|
| Q9DBE6 | 60S ribosomal protein L4 OS=Mus musculus OX=10090 GN=Rpl4 PE=1 Sv+3 [-LALU_MOUSE]                                 | Rpl4    | 161.6758362  | 115.8720066 | 5.250026715 | 46.0680325  | 0.2          | 0.726530612 | 0.015106661 | -0.532972592 |              |             |             |             |              |              |
| Q07724 | Albumin OS=Mus musculus OX=10090 GN=Aib PE=1 Sv+3 [-ALBU_MOUSE]                                                   | Alb     | 313814.13322 | 550157.6209 | 601174.4741 | 2959385.887 | 278891.9922  | 441185.7566 | 488382.1424 | 33857.2025   | 153317.0574  | 89270.3936  | 0.2         | 0.726530612 | 0.693221912  | -0.528610838 |
| Q9BVN2 | Subunit/potassium-transporting ATPase subunit alpha-1 OS=Mus musculus OX=10090 GN=Atp1a1 PE=1 Sv+3 [-AT1A1_MOUSE] | Atp1a1  | 239.7868023  | 199.8140987 | 207.518306  | 61.64259671 | 202.9005284  | 165.1939863 | 215.7604023 | 49.9123705   | 21.20702597  | 0.2         | 0.726530612 | 0.056265663 | -0.524984940 |              |
| Q6P175 | Peptidyl-prolyl cis-trans isomerase FKBP10 OS=Mus musculus OX=10090 GN=Fkbp10 PE=1 Sv+2 [-FKBP10_MOUSE]           | Fkbp10  | 68.49042775  | 102.4826205 | 100.303708  | 45.5199542  | 68.102939262 | 78.46877191 | 90.42557941 | 64.03055613  | 19.02761294  | 16.84768399 | 0.2         | 0.726530612 | 0.708102249  | -0.497970397 |
| Q6P165 | Sodium/potassium-transporting ATPase subunit alpha-2 OS=Mus musculus OX=10090 GN=Atp2a2 PE=1 Sv+2 [-AT1A2_MOUSE]  | Atp2a2  | 229.3236097  | 199.8140987 | 217.009606  | 81.64259671 | 208.9005284  | 176.1454826 | 215.3816266 | 153.5622076  | 14.24421001  | 63.70384946 | 0.2         | 0.726530612 | 0.465072329  | -0.415578225 |
| Q08905 | Lysosome C-2 OS=Mus musculus OX=10090 GN=C2 PE=1 Sv+2 [-LV2_MOUSE]                                                | Lyz2    | 55.79255928  | 68.0361841  | 86.27708974 | 43.63265948 | 66.7340083   | 47.10523822 | 70.02526437 | 52.506764    | 15.540025396 | 12.1466723  | 0.2         | 0.726530612 | 0.749789388  | -0.415578225 |
| Q02819 | Nucleobindin-1 OS=Mus musculus OX=10090 GN=Nubcl1 PE=1 Sv+2 [-NUBCL_MOUSE]                                        | Nubcl1  | 468.7033883  | 612.9273625 | 642.3009936 | 392.8041582 | 423.1172817  | 478.4997712 | 574.6431408 | 441.491737   | 92.91527816  | 43.40447651 | 0.2         | 0.726530612 | 0.750885419  | -0.413335317 |
| T28653 | Biglycan OS=Mus musculus OX=10090 GN=Bgn PE=1 Sv+1 [-PGSL_MOUSE]                                                  | Bgn     | 62.90861951  | 69.6951031  | 33.16412209 | 60.75750054 | 32.1212872   | 32.6873027  | 55.25497464 | 41.82562127  | 19.43066265  | 16.37467983 | 0.2         | 0.726530612 | 0.400813186  | -0.3754309   |
| PS3979 | 60S ribosomal protein L12 OS=Mus musculus OX=10090 GN=Rpl12 PE=1 Sv+2 [-RL12_MOUSE]                               | Rpl12   | 265.84253    | 209.5807382 | 202.0282516 | 172.9860538 | 238.5564089  | 177.1805981 | 255.8248034 | 194.2140203  | 49.54525637  | 36.70616617 | 0.2         | 0.726530612 | 0.767091451  | -0.382529512 |
| PS3026 | 60S ribosomal protein L10a OS=Mus musculus OX=10090 GN=Rpl10a PE=1 Sv+3 [-RL10A_MOUSE]                            | Rpl10a  | 142.6916626  | 209.4925112 | 161.8107672 | 125.2409283 | 157.5044004  | 117.2159311 | 171.331627  | 133.204206   | 34.0407276   | 21.32483985 | 0.2         | 0.726530612 | 0.361892175  | -0.31876425  |
| Q60605 | Myosin light polypeptide 6 OS=Mus musculus OX=10090 GN=MyI6 PE=1 Sv+3 [-MYI6_MOUSE]                               | Myi6    | 501.02167125 | 563.9552817 | 439.4787139 | 480.5859372 | 413.874858   | 311.8196428 | 501.4852227 | 402.093479   | 62.23957857  | 84.99774225 | 0.2         | 0.726530612 | 0.801805240  | -0.318676249 |
| P29341 | Polyadenylation-binding protein 1 OS=Mus musculus OX=10090 GN=Pabpc1 PE=1 Sv+2 [-PABP1_MOUSE]                     | Pabpc1  | 881.8669611  | 930.14731   | 788.2296224 | 599.488427  | 718.6665862  | 539.225589  | 766.7479645 | 619.1103939  | 76.43861387  | 91.32365959 | 0.2         | 0.726530612 | 0.800744963  | -0.308554979 |
| Q0K421 | Acyl-CoA carrier protein, mitochondrial OS=Mus musculus OX=10090 GN=Ndufab1 PE=1 Sv+1 [-CAPM_MOUSE]               | Ndufab1 | 105.8110675  | 138.209051  | 118.1970738 | 109.0926264 | 103.1323995  | 94.6471209  | 107.763388  | 102.2907065  | 10.46765111  | 7.295492019 | 0.2         | 0.726530612 | 0.846243262  | -0.23662727  |
| Q9R000 | Syntaxin-12 OS=Mus musculus OX=10090 GN=Stx12 PE=1 Sv+1 [-STX12_MOUSE]                                            | Stx12   | 88.44616867  | 81.21720934 | 106.391047  | 106.7883343 | 110.8288179  | 91.70523822 | 92.00564991 | 103.1074633  | 12.94553389  | 10.07915834 | 0.2         | 0.726530612 | 1.120628972  | -0.16430689  |
| Q00493 | Carboxypeptidase E OS=Mus musculus OX=10090 GN=Cpe PE=1 Sv+2 [-CPBE_MOUSE]                                        | Cpe     | 3638.282086  | 3823.58617  | 4584.282974 | 4431.831843 | 4093.356525  | 4629.912076 | 4015.387343 | 4664.037527  | 50.3174162   | 22.5101406  | 0.2         | 0.726530612 | 0.161245126  | -0.156241526 |
| 9P7798 | Neogenin OS=Mus musculus OX=10090 GN=Neog1 PE=1 Sv+1 [-NEO1_MOUSE]                                                | Neog1   | 78.07339861  | 59.4374115  | 76.71285357 | 79.74617395 | 95.19207906  | 77.212382   | 74.0979789  | 84.05021167  | 10.38884253  | 9.731954178 | 0.2         | 0.726530612 | 1.177041986  | -0.235165784 |
| Q9JME2 | Carboxy diethyle sulfotransferase 11 OS=Mus musculus OX=10090 GN=Cst11 PE=2 Sv+1 [-CHSTB_MOUSE]                   | Cst11   | 115.5346966  | 90.9083919  | 77.84974107 | 84.5183883  | 115.1821491  | 101.9682157 | 78.0797197  | 105.536162   | 12.68866659  | 15.8046338  | 0.2         | 0.726530612 | 1.025752228  | -0.364536374 |
| Q810U4 | Neuronal cell adhesion molecule 5 OS=Mus musculus OX=10090 GN=Nrcam PE=1 Sv+2 [-NRCAM_MOUSE]                      | Nrcam   | 279.5460754  | 282.9038602 | 322.529119  | 322.225201  | 464.198987   | 354.754119  | 295.0497085 | 320.398273   | 23.90606408  | 74.37826211 | 0.2         | 0.726530612 | 1.289250123  | -0.366532183 |
| Q9R1Q0 | V-type proton ATPase subunit S1 OS=Mus musculus OX=10090 GN=Vps1 PE=1 Sv+1 [-VAS1_MOUSE]                          | Atp6a1  | 291.7635529  | 299.7524971 | 379.9831866 | 335.9203869 | 527.2435099  | 413.2862502 | 303.3307889 | 425.483467   | 48.71092517  | 96.24297706 | 0.2         | 0.726530612 | 1.313897475  | -0.339852705 |
| PS1516 | Cadherin-2 OS=Mus musculus OX=10090 GN=Cdih2 PE=1 Sv+2 [-CADH2_MOUSE]                                             | Cdh2    | 803.5164595  | 632.6559702 | 980.5839312 | 938.0273381 | 1219.242971  | 1046.028327 | 805.5469103 | 607.769559   | 17.04105001  | 14.81587767 | 0.2         | 0.726530612 | 1.325512264  | -0.40655984  |
| Q9Z0L8 | Gamma-glutamyl hydrolase OS=Mus musculus OX=10090 GN=Ggh PE=1 Sv+2 [-GGH_MOUSE]                                   | Ggh     | 248.3736485  | 304.9989991 | 349.2738141 | 322.0300745 | 400.4020815  | 442.7271118 | 300.8821506 | 401.7184779  | 50.7597906   | 69.03064548 | 0.2         | 0.726530612 | 1.353135264  | -0.4196863   |
| Q9QZ27 | Translin-associated protein 1 OS=Mus musculus OX=10090 GN=Tnfrap1 PE=1 Sv+1 [-TSNAX_MOUSE]                        | Tnfrap1 | 91.87346125  | 82.0951474  | 90.0849974  | 130.0011341 | 136.5411103  | 90.3487184  | 88.01885201 | 118.891699   | 5.20483751   | 24.98897369 | 0.2         | 0.726530612 | 1.351135137  | -0.434703647 |
| P47867 | Serogalactin-3 OS=Mus musculus OX=10090 GN=Scg3 PE=1 Sv+1 [-SGC3_MOUSE]                                           | Scg3    | 262.1446588  | 300.1662091 | 366.5504501 | 353.757954  | 466.964632   | 441.8867991 | 309.6204387 | 420.8693526  | 52.84107553  | 59.45738471 | 0.2         | 0.726530612 | 1.359307397  | -0.442871748 |
| T31786 | Acyl-CoA:DNA-biotin-dependent ligase OS=Mus musculus OX=10090 GN=Acbl PE=1 Sv+2 [-ACBP_MOUSE]                     | Dbi     | 4721.539915  | 2586.871928 | 2902.587368 | 5290.623967 | 4956.467558  | 3686.152609 | 4603.663997 | 4644.414171  | 115.2177079  | 846.5310503 | 0.2         | 0.726530612 | 0.448407158  | -0.444407158 |
| Q8C1Q4 | Mutator OS=Mus musculus OX=10090 GN=Metrr PE=1 Sv+2 [-METRR_MOUSE]                                                | Metrr   | 232.9680209  | 230.5466567 | 281.3879537 | 241.5489057 | 348.7884649  | 427.7203849 | 248.3002154 | 339.5348852  | 68.68042864  | 93.44501261 | 0.2         | 0.726530612 | 1.366070366  | -0.450703317 |
| Q88851 | Purine hydrolase RBBP9 OS=Mus musculus OX=10090 GN=Rbbp9 PE=1 Sv+2 [-RBBP9_MOUSE]                                 | Rbbp9   | 192.0112909  | 105.3777744 | 130.7704072 | 183.5356356 | 129.9466865  | 158.5113651 | 115.0198242 | 157.3472291  | 13.75434781  | 26.79845195 | 0.2         | 0.726530612 | 1.368000953  | -0.452069235 |
| Q55029 | Cotamer subunit beta' OS=Mus musculus OX=10090 GN=Copb2 PE=1 Sv+2 [-COPB2_MOUSE]                                  | Copb2   | 75.62351295  | 28.1198951  | 46.9823986  | 80.30627999 | 77.46553088  | 51.9010096  | 50.8095636  | 69.89096701  | 23.14386951  | 15.64430298 | 0.2         | 0.726530612 | 1.375644898  | -0.46010108  |
| Q8X090 | Filamin-B OS=Mus musculus OX=10090 GN=Flnb PE=1 Sv+3 [-FLNB_MOUSE]                                                | Flnb    | 506.5830985  | 296.7296502 | 219.8517727 | 513.0162232 | 516.9318061  | 281.3127781 | 371.7125017 | 437.1019358  | 163.595085   | 134.9312472 | 0.2         | 0.726530612 | 1.375739212  | -0.460207105 |
| Q8VHX6 | Filamin-C OS=Mus musculus OX=10090 GN=Flnc PE=1 Sv+3 [-FLNC_MOUSE]                                                | Flnc    | 506.5830985  | 296.7296502 | 219.8517727 | 513.0162232 | 516.9318061  | 281.3127781 | 371.7125017 | 437.1019358  | 163.595085   | 134.9312472 | 0.2         | 0.726530612 | 1.375739212  | -0.460207105 |
| Q01424 | Adenyllyl cyclase-associated protein 1 OS=Mus musculus OX=10090 GN=Cap1 PE=1 Sv+4 [-CAP1_MOUSE]                   | Cap1    | 472.349188   | 194.0921436 | 192.4509167 | 402.0061232 | 497.9979459  | 198.322162  | 286.2807948 | 396.3112658  | 161.1422134  | 171.4760118 | 0.2         | 0.726530612 | 1.38444799   | -0.46920332  |
| Q9R080 | Protein SGT1 homolog OS=Mus musculus OX=10090 GN=SGT1 PE=1 Sv+1 [-ACTM1_MOUSE]                                    | Actm1   | 584.3629037  | 382.7931983 | 74.4572732  | 156.1948876 | 171.927095   | 96.32038908 | 90.2763769  | 141.4752321  | 48.44438176  | 39.9031326  | 0.2         | 0.726530612 | 1.420646859  | -0.475177962 |
| Q7YFR4 | Alpha-actinin-1 OS=Mus musculus OX=10090 GN=Actn1 PE=1 Sv+1 [-ACTN1_MOUSE]                                        | Actn1   | 584.3629037  | 382.7931983 | 325.7754586 | 677.151753  | 685.7707804  | 453.0411278 | 490.9771839 | 529.321204   | 158.607364   | 142.3359881 | 0.2         | 0.726530612 | 1.428888817  | -0.475177962 |
| Q9ZT04 | Heterogeneous nuclear ribonucleoproteins C1/C2 OS=Mus musculus OX=10090 GN=Hnrcp1 PE=1 Sv+1 [-HNRCP_MOUSE]        | Hnrcp1  | 809.320042   | 402.6588955 | 406.7863272 | 575.8995234 | 843.5400066  | 513.6865693 | 506.4258444 | 704.3766998  | 176.1627551  | 170.8573929 | 0.2         | 0.726530612 | 1.390878265  | -0.479561955 |
| PA9312 | Heterogeneous nuclear ribonucleoprotein A1 OS=Mus musculus OX=10090 GN=Hnmpa1 PE=1 Sv+2 [-ROA1_MOUSE]             | Hnmpa1  | 2499.245632  | 1132.679014 | 1314.034219 | 2525.992916 | 2501.328195  | 1609.299    | 1588.653095 | 2212.206697  | 788.9984669  | 522.2790016 | 0.2         | 0.726530612 | 1.392504571  | -0.477682064 |
| Q9D3A9 | Protein tweety homolog 1 OS=Mus musculus OX=10090 GN=Tyhl1 PE=1 Sv+1 [-TTYH1_MOUSE]                               | Tyhl1   | 6.03932610   | 30.4398677  | 48.48697451 | 48.83179712 | 81.51016217  | 97.64579605 | 48.64339947 | 67.76583311  | 18.28225009  | 16.94594112 | 0.2         | 0.726530612 | 1.393105929  | -0.478308069 |
| PE1089 | Ubiquitin-conjugating enzyme E2 N OS=Mus musculus OX=10090 GN=Ube2n PE=1 Sv+1 [-UBE2N_MOUSE]                      | Ube2n   | 146.7661795  | 93.63164563 | 100.6621986 | 150.9402625 | 1491.196408  | 191.0597701 | 933.6482834 | 1303.732934  | 46.6217008   | 33.1723372  | 0.2         | 0.726530612 | 1.396835521  | -0.481697292 |
| Q01730 | Ras suppressor protein 1 OS=Mus musculus OX=10090 GN=Rsu1 PE=1 Sv+3 [-RSU1_MOUSE]                                 | Rsu1    | 216.0821277  | 97.9873424  | 112.0334967 | 249.7993415 | 234.7926606  | 117.9284363 | 142.0343373 | 200.8401451  | 64.510736    | 72.19462645 | 0.2         | 0.726530612 | 1.414022591  | -0.499807924 |
| Q06138 | Calcium-binding protein 39 OS=Mus musculus OX=10090 GN=Cab39 PE=1 Sv+2 [-CAB39_MOUSE]                             | Cab39   | 177.0745916  | 90.61348828 | 89.48837209 | 177.9429567 | 179.8546607  | 119.5096663 | 112.3398393 | 153.094909   | 38.70232359  | 34.30664663 | 0.2         | 0.726530612 | 1.415552837  | -0.5013656   |
| Q23506 | Protein C-15isopartate(0-aspartate) O-methyltransferase OS=Mus musculus OX=10090 GN=Pcm1 PE=1 Sv+3 [-PIMT_MOUSE]  | Pcm1    | 137.458166   | 62.9813512  | 97.15858366 | 104.0289151 | 144.0289151  | 96.32038908 | 85.87440197 | 127.704058   | 44.7652223   | 31.83399667 | 0.2         | 0.726530612 | 1.428888817  | -0.514889571 |
| P26889 | 60S ribosomal protein L30 OS=Mus musculus OX=10090 GN=Rpl30 PE=1 Sv+2 [-RL30_MOUSE]                               | Rpl30   | 136.5640025  | 55.73522173 | 57.27227131 | 138.1514344 | 141.5138473  | 77.703911   | 83.19052623 | 119.1230639  | 46.22924213  | 35.90941555 | 0.2         | 0.726530612 | 1.431930645  | -0.517961631 |
| P26369 | Splicing factor U2AF 65 kDa subunit OS=Mus musculus OX=10090 GN=U2af1 PE=1 Sv+3 [-U2AF2_MOUSE]                    | U2af1   | 372.2214613  | 186.304985  | 97.607629   | 411.6501469 | 419.9705703  | 252.6620915 | 205.2446918 | 361.4276029  | 10.2049555   | 94.2852322  | 0.2         | 0.726530612 | 1.433826019  | -0.520027121 |
| PS4728 | UV excision repair protein RAD23 homolog B OS=Mus musculus OX=10090 GN=Rad23b PE=1 Sv+2 [-RO23B_MOUSE]            | Rad23b  | 319.1139373  | 145.3895933 | 157.6192834 | 336.6514337 | 361.3087474  | 194.8478574 | 207.3742713 | 297.6023817  | 96.96239502  | 89.87393078 | 0.2         |             |              |              |

|        |                                                 |                                            |                                     |               |              |             |             |             |             |             |             |              |              |             |             |             |             |             |             |             |
|--------|-------------------------------------------------|--------------------------------------------|-------------------------------------|---------------|--------------|-------------|-------------|-------------|-------------|-------------|-------------|--------------|--------------|-------------|-------------|-------------|-------------|-------------|-------------|-------------|
| QD909  | Arginine-tRNA ligase, cytoplasmic               | OS-Mus musculus OX10090 GN-Hrrs1           | Pe1 S1-V2                           | [SYRC_MOUSE]  | Rars1        | 201.3319244 | 88.55317123 | 222.4966288 | 233.765704  | 117.6312504 | 192.7577813 | 60.738323847 | 61.528386617 | 0.2         | 0.726530612 | 1.638661328 | 0.712517715 |             |             |             |
| Q62446 | Peptidyl-prolyl cis-trans isomerase FKBP3       | OS-Mus musculus OX10090 GN-Fkbp3           | Pe1 S1-V2                           | [FKBP3_MOUSE] | Fkbp3        | 460.4161775 | 120.6533732 | 114.4676293 | 484.7572073 | 481.3386614 | 191.547806  | 234.8463813  | 385.8809515  | 203.1669066 | 168.3067446 | 0.2         | 0.726530612 | 1.643120704 | 0.716484865 |             |
| QD9863 | AP-2 complex subunit beta                       | OS-Mus musculus OX10090 GN-Ap2b1           | Pe1 S1-V1                           | [AP2B1_MOUSE] | Ap2b1        | 354.9036383 | 116.9751814 | 144.667224  | 382.1324251 | 414.3635755 | 223.9605856 | 206.1820146  | 104.2519594  | 129.4357419 | 101.9072980 | 0.2         | 0.726530612 | 1.442261672 | 0.716065572 |             |
| QJ7033 | Ubiquitin thioesterase OTUB1                    | OS-Mus musculus OX10090 GN-OTub1           | Pe1 S1-V2                           | [OTUB1_MOUSE] | OTub1        | 502.5279978 | 138.9439092 | 176.8262483 | 537.391387  | 567.9722139 | 245.7051115 | 272.7658518  | 450.3562375  | 199.8793688 | 177.891425  | 0.2         | 0.726530612 | 1.651072649 | 0.723403602 |             |
| Q61597 | Nucleophosmin                                   | OS-Mus musculus OX10090 GN-Npm1            | Pe1 S1-V1                           | [NPM_MOUSE]   | Npm1         | 364.0529052 | 185.7155562 | 165.534205  | 429.7891884 | 502.0072359 | 238.5675564 | 393.8378078  | 552.691078   | 109.1226601 | 178.7309149 | 0.2         | 0.726530612 | 1.657244547 | 0.724454547 |             |
| Q62141 | Macrophage colony-stimulating factor 1          | OS-Mus musculus OX10090 GN-Mcf1            | Pe1 S1-V2                           | [CSF1_MOUSE]  | Csf1         | 43.0247425  | 16.63710458 | 16.7327884  | 83.78655483 | 131.0704828 | 76.17671997 | 88.66641342  | 97.01273586  | 16.73882767 | 20.74310576 | 0.2         | 0.726530612 | 1.653363236 | 0.725393669 |             |
| Q9EQH3 | Vacuolar protein sorting-associated protein 35  | OS-Mus musculus OX10090 GN-Vps35           | Pe1 S1-V1                           | [VPS35_MOUSE] | Vps35        | 139.739704  | 36.31676312 | 44.2276229  | 147.717996  | 104.0142744 | 51.16136957 | 73.4280304   | 122.9918412  | 57.5635177  | 63.19538019 | 0.2         | 0.726530612 | 1.674993611 | 0.744455593 |             |
| PA7962 | 60S ribosomal protein L5                        | OS-Mus musculus OX10090 GN-Rpl5            | Pe1 S1-V3                           | [RL5_MOUSE]   | Rpl5         | 143.9988766 | 42.36659774 | 54.69036512 | 171.1734783 | 154.0104307 | 78.7271997  | 80.35194349  | 134.6371262  | 55.46320423 | 49.17402548 | 0.2         | 0.726530612 | 1.674671564 | 0.744671564 |             |
| QO5883 | THO complex subunit 4                           | OS-Mus musculus OX10090 GN-Thyf4           | Pe1 S1-V3                           | [THOC4_MOUSE] | Thyf4        | 382.7630181 | 30.3230133  | 0           | 433.3307139 | 394.9674188 | 32.3623621  | 230.6953438  | 388.8868196  | 203.1344747 | 90.5669098  | 0.2         | 0.726530612 | 1.677405603 | 0.745926294 |             |
| PS3994 | Ras-related protein Rab-2A                      | OS-Mus musculus OX10090 GN-Rab2a           | Pe1 S1-V1                           | [RAB2A_MOUSE] | Rab2a        | 97.45290511 | 28.62313977 | 24.26238013 | 102.0678368 | 97.76416274 | 53.29568178 | 50.1280834   | 84.37589354  | 41.05566499 | 27.0021323  | 0.2         | 0.726530612 | 1.675195156 | 0.745195156 |             |
| PS4822 | Adenylylsuccinate lyase                         | OS-Mus musculus OX10090 GN-Adsl            | Pe1 S1-V2                           | [PURR_MOUSE]  | Adsl         | 272.2440008 | 78.2961538  | 65.9732949  | 282.515995  | 270.1766927 | 128.0432897 | 138.832305   | 233.7856858  | 115.7016535 | 91.64369673 | 0.2         | 0.726530612 | 1.683749434 | 0.751674692 |             |
| Q9PK96 | Pre-mRNA-processing factor 19                   | OS-Mus musculus OX10090 GN-Prpf19          | Pe1 S1-V1                           | [PRP19_MOUSE] | Prpf19       | 411.6731702 | 108.306413  | 108.8166108 | 455.4421285 | 452.0413606 | 202.5709598 | 219.5987314  | 370.0180283  | 192.3222748 | 105.6236991 | 0.2         | 0.726530612 | 1.684873433 | 0.752725845 |             |
| Q9C974 | Glyoxalase domain-containing protein 4          | OS-Mus musculus OX10090 GN-Glo4p           | Pe1 S1-V1                           | [GLO4_MOUSE]  | Glo4p        | 344.4488037 | 132.6209085 | 116.3355408 | 413.7476191 | 395.868547  | 191.5635255 | 197.8681621  | 333.7265729  | 127.1264122 | 123.4409112 | 0.2         | 0.726530612 | 1.686610768 | 0.754127307 |             |
| PS2774 | Myotrophin                                      | OS-Mus musculus OX10090 GN-Mtn             | Pe1 S1-V2                           | [MTPN_MOUSE]  | Mtn          | 361.5476807 | 126.4515786 | 167.6308098 | 547.6998873 | 568.8204315 | 239.0599279 | 265.3699594  | 451.8599489  | 190.771986  | 184.523522  | 0.2         | 0.726530612 | 1.686708167 | 0.754210381 |             |
| PS0416 | Peptidyl-prolyl cis-trans isomerase FKBP4       | OS-Mus musculus OX10090 GN-Fkbp4           | Pe1 S1-V5                           | [FKBP4_MOUSE] | Fkbp4        | 304.7000838 | 77.2947205  | 76.5015872  | 326.623145  | 316.134718  | 170.772095  | 218.3507525  | 368.604916   | 125.55029   | 110.7492113 | 0.2         | 0.726530612 | 1.687254965 | 0.754587957 |             |
| 9R7855 | Ras GTPase-activating protein-binding protein 1 | OS-Mus musculus OX10090 GN-G3bp1           | Pe1 S1-V1                           | [G3BP1_MOUSE] | G3bp1        | 334.9007769 | 86.83833939 | 113.1029798 | 391.0612896 | 357.017375  | 153.167315  | 178.0400313  | 300.4334662  | 135.7721885 | 128.6633123 | 0.2         | 0.726530612 | 1.687411052 | 0.754811456 |             |
| Q9Z2X1 | Heterogeneous nuclear ribonucleoprotein F       | OS-Mus musculus OX10090 GN-Hnmpf           | Pe1 S1-V3                           | [HNRF_MOUSE]  | Hnmpf        | 634.5632518 | 173.3139506 | 217.841273  | 646.4527709 | 758.8673516 | 338.4561773 | 341.9015685  | 581.2575666  | 254.424511  | 217.6544122 | 0.2         | 0.726530612 | 1.687557183 | 0.75497183  |             |
| Q8C854 | Myelin expression factor 2                      | OS-Mus musculus OX10090 GN-Myef2           | Pe1 S1-V1                           | [MYEF2_MOUSE] | Myef2        | 209.974459  | 10.61977336 | 13.08238956 | 30.36798138 | 27.77568855 | 197.9970646 | 14.9000196   | 25.38054346  | 5.422232174 | 6.523564548 | 0.2         | 0.726530612 | 1.703389398 | 0.768408733 |             |
| Q9L953 | Phosphoserine phosphatase                       | OS-Mus musculus OX10090 GN-Psh             | Pe1 S1-V1                           | [SERB_MOUSE]  | Psh          | 296.7792596 | 108.0280667 | 111.5524351 | 324.2716871 | 338.8138825 | 218.5410874 | 271.1199205  | 293.875523   | 107.9725355 | 65.64584783 | 0.2         | 0.726530612 | 1.707388381 | 0.771791267 |             |
| PT2612 | Phospholipase A-2-activating protein            | OS-Mus musculus OX10090 GN-Plaa            | Pe1 S1-V4                           | [PLAA_MOUSE]  | Plaa         | 95.6488717  | 37.00903252 | 34.00995954 | 115.9761359 | 103.472323  | 65.4508443  | 51.89960985  | 88.6666317   | 38.52626335 | 37.00550991 | 0.2         | 0.726530612 | 1.70842551  | 0.772667569 |             |
| Q91W18 | Far upstream element-binding protein 1          | OS-Mus musculus OX10090 GN-Fu1p1           | Pe1 S1-V1                           | [FUBP1_MOUSE] | Fu1p1        | 329.6207237 | 94.7695547  | 72.44966702 | 332.5810648 | 335.7631473 | 179.9772006 | 165.4309495  | 287.738108   | 142.1567527 | 89.03869211 | 0.2         | 0.726530612 | 1.709232095 | 0.774213314 |             |
| Q9B011 | NADP-dependent malic enzyme                     | OS-Mus musculus OX10090 GN-Mel1            | Pe1 S1-V2                           | [MAOX_MOUSE]  | Mel1         | 484.163855  | 148.3882136 | 159.5380098 | 547.6998873 | 568.8204315 | 239.0599279 | 265.3699594  | 451.8599489  | 190.771986  | 184.523522  | 0.2         | 0.726530612 | 1.71177855  | 0.77501972  |             |
| PT0168 | Importin subunit beta 1                         | OS-Mus musculus OX10090 GN-Importin beta 1 | Pe1 S1-V2                           | [IMB1_MOUSE]  | Impb1        | 466.616783  | 151.7217574 | 181.0525034 | 517.429167  | 546.480343  | 293.490381  | 266.4645813  | 488.4668802  | 173.9562895 | 144.7976852 | 0.2         | 0.726530612 | 1.720556172 | 0.782373736 |             |
| PS2480 | Pyruvate kinase PKM                             | OS-Mus musculus OX10090 GN-Pkm1            | Pe1 S1-V4                           | [PKM_MOUSE]   | Pkm1         | 431.421777  | 709.4749707 | 116.4994077 | 3552.683123 | 3539.769576 | 1582.135062 | 1799.789701  | 2891.527754  | 504.92575   | 1133.989614 | 0.2         | 0.726530612 | 1.731535727 | 0.783545352 |             |
| Q61205 | Platelet-activating factor acetylhydrolase II   | Subunit alpha                              | OS-Mus musculus OX10090 GN-Pafah1b3 | Pe1 S1-V1     | [PAI3_MOUSE] | Pafah1b3    | 150.7706106 | 57.25099618 | 55.18935483 | 152.3189964 | 212.8954421 | 90.29223621  | 87.7369872   | 152.0478874 | 54.59845098 | 60.98305123 | 0.2         | 0.726530612 | 1.73299645  | 0.793266699 |
| Q9CZD3 | Glycine-tRNA ligase                             | OS-Mus musculus OX10090 GN-Gars1           | Pe1 S1-V1                           | [GARS_MOUSE]  | Gars1        | 204.6085562 | 51.03686936 | 62.56565995 | 225.524873  | 229.425073  | 99.88008524 | 106.070363   | 138.95266    | 85.53105428 | 72.89000264 | 0.2         | 0.726530612 | 1.734251253 | 0.794212829 |             |
| Q83842 | WD repeat-containing protein 1                  | OS-Mus musculus OX10090 GN-Wdr1            | Pe1 S1-V3                           | [WDR1_MOUSE]  | Wdr1         | 746.039141  | 367.4839981 | 359.9351976 | 1006.736163 | 1015.315039 | 539.7813739 | 491.1527789  | 853.9441198  | 220.7703315 | 272.1067923 | 0.2         | 0.726530612 | 1.738652877 | 0.797969266 |             |
| Q8COM9 | Isoaspartyl peptidase/L-asparaginase            | OS-Mus musculus OX10090 GN-Asg11           | Pe1 S1-V1                           | [ASGL1_MOUSE] | Asg11        | 221.6319053 | 134.5694113 | 129.5994061 | 288.4580038 | 358.2568812 | 214.3089416 | 174.0253209  | 807.007942   | 49.5994703  | 71.98429438 | 0.2         | 0.726530612 | 1.740126509 | 0.799190538 |             |
| Q9DAK9 | 14 kDa phosphohistidine phosphatase             | OS-Mus musculus OX10090 GN-PHp1            | Pe1 S1-V1                           | [PHP1_MOUSE]  | Php1         | 188.5644231 | 61.18038446 | 38.58732236 | 214.9900747 | 188.204351  | 99.0898757  | 96.11067296  | 167.6273058  | 80.86017655 | 60.78267065 | 0.2         | 0.726530612 | 1.744107086 | 0.802488623 |             |
| QO0612 | Glyoxalase-6-phosphate 1                        | OS-Mus musculus OX10090 GN-G6pp1           | Pe1 S1-V3                           | [GGPD1_MOUSE] | G6pp1        | 118.9822259 | 36.49116233 | 41.09674216 | 133.2321075 | 142.5404367 | 67.06576408 | 65.3327668   | 114.280421   | 48.35395069 | 41.15116158 | 0.2         | 0.726530612 | 1.744109265 | 0.802491857 |             |
| Q9JL47 | Hsc70-interacting protein                       | OS-Mus musculus OX10090 GN-Hsc70i          | Pe1 S1-V1                           | [FIOM_MOUSE]  | Hsc70i       | 131.8395234 | 84.1693808  | 35.72744216 | 142.1062626 | 196.7373739 | 102.7327826 | 84.2642915   | 147.190952   | 48.55610491 | 47.20933899 | 0.2         | 0.726530612 | 1.747168408 | 0.805218672 |             |
| Q60843 | Eukaryotic initiation factor 4A1                | OS-Mus musculus OX10090 GN-Eif4a1          | Pe1 S1-V1                           | [IF4A_MOUSE]  | Eif4a1       | 75.9289593  | 258.9281144 | 255.010955  | 809.1881333 | 948.2664099 | 45.9722416  | 42.2286234   | 739.0759498  | 286.351488  | 251.6812749 | 0.2         | 0.726530612 | 1.750164777 | 0.807500402 |             |
| Q8HW16 | Eukaryotic translation initiation factor 2A     | OS-Mus musculus OX10090 GN-Eif2a           | Pe1 S1-V2                           | [EIF2A_MOUSE] | Eif2a        | 136.9747517 | 38.26039376 | 36.97270447 | 157.3722042 | 157.2705224 | 70.7359493  | 123.84007    | 57.36809095  | 57.69209255 | 40.80595493 | 0.2         | 0.726530612 | 1.751540433 | 0.808594536 |             |
| Q62318 | Transcription intermediary factor 1-beta        | OS-Mus musculus OX10090 GN-Trim28          | Pe1 S1-V3                           | [TIF1B_MOUSE] | Trim28       | 248.3105712 | 63.42523891 | 52.57763736 | 265.0804257 | 270.458939  | 107.0259897 | 122.6691548  | 214.1807728  | 109.4844012 | 92.83738182 | 0.2         | 0.726530612 | 1.754042933 | 0.81086260  |             |
| Q62465 | Synaptic vesicle membrane protein VAT-1         | homolog OS-Mus musculus OX10090 GN-Vat1    | Pe1 S1-V3                           | [VAT1_MOUSE]  | Vat1         | 95.97805974 | 29.83121209 | 38.24945367 | 103.9340225 | 126.8589415 | 58.6219312  | 64.1880233   | 96.45119704  | 36.0062949  | 34.75773452 | 0.2         | 0.726530612 | 1.763792154 | 0.816269031 |             |
| OS3405 | 5'-3' exonuclease PLD3                          | OS-Mus musculus OX10090 GN-Pld3            | Pe1 S1-V1                           | [PLD3_MOUSE]  | Pld3         | 149.6390122 | 114.5951994 | 101.010684  | 243.6276951 | 273.0192401 | 128.1507659 | 121.7482986  | 215.0665921  | 25.0909866  | 76.39068497 | 0.2         | 0.726530612 | 1.766485402 | 0.820881827 |             |
| Q921M7 | CYFP-related Rac1 interactor B                  | OS-Mus musculus OX10090 GN-Cyrb            | Pe1 S1-V1                           | [CYRB_MOUSE]  | Cyrb         | 150.1449247 | 57.72688159 | 63.3698869  | 232.1288545 | 260.71380   | 82.58141733 | 90.4138975   | 159.8080263  | 51.80547816 | 74.89431891 | 0.2         | 0.726530612 | 1.767156177 | 0.821723414 |             |
| Q91YR1 | Twinfilin-1                                     | OS-Mus musculus OX10090 GN-Twf1            | Pe1 S1-V2                           | [TWF_MOUSE]   | Twf1         | 177.6043421 | 60.6630876  | 61.3981408  | 202.4035387 | 214.8197229 | 113.8641134 | 100.8882036  | 77.0293125   | 117.389073  | 55.05366402 | 0.2         | 0.726530612 | 1.768818529 | 0.822768559 |             |
| Q8WC73 | Aminopyridine oxidase                           | OS-Mus musculus OX10090 GN-Rnppe           | Pe1 S1-V2                           | [AMPB_MOUSE]  | Rnppe        | 124.6708677 | 44.51724084 | 66.75247216 | 169.417229  | 166.7553667 | 70.94527967 | 84.24542915  | 147.190952   | 48.55610491 | 47.20933899 | 0.2         | 0.726530612 | 1.770543508 | 0.824192166 |             |
| PT2907 | Porphobilinogen deaminase                       | OS-Mus musculus OX10090 GN-Hmb             | Pe1 S1-V2                           | [HMB_MOUSE]   | Hmb5         | 53.64368396 | 10.46632038 | 10.58503983 | 64.87455582 |             |             |              |              |             |             |             |             |             |             |             |

|        |                                                                                                                                              |         |               |             |             |             |             |              |             |              |              |             |             |             |             |             |
|--------|----------------------------------------------------------------------------------------------------------------------------------------------|---------|---------------|-------------|-------------|-------------|-------------|--------------|-------------|--------------|--------------|-------------|-------------|-------------|-------------|-------------|
| Q6474  | Spermidine-synthesizing O5+Mus musculus OX10090 GN+Srmr Pe1 S1v1 - [SPEM_MOUSE]                                                              | Srmr    | 20.1678466939 | 54.260421   | 66.57627594 | 322.6363063 | 336.4764911 | 133.7706647  | 129.8089958 | 264.2944807  | 120.4355521  | 113.2485828 | 0.2         | 0.726530612 | 2.035212221 | 1.025129331 |
| QR8378 | Interferon regulatory factor 2-binding protein 1 O5+Mus musculus OX10090 GN+Irf2bp1 Pe1 S1v2 - [Irf2BP1_MOUSE]                               | Irf2bp1 | 42.85654324   | 15.07465784 | 0.45683921  | 47.99542268 | 25.95000203 | 19.31400306  | 39.38459464 | 21.73998529  | 12.0687315   | 0.2         | 0.726530612 | 2.0395535   | 1.028233551 | 1.028233551 |
| PE2908 | 40S ribosomal protein S3 O5+Mus musculus OX10090 GN+Rps3 Pe1 S1v1 - [RS3_MOUSE]                                                              | Rps3    | 250.3957456   | 40.86067168 | 32.66530711 | 267.5780384 | 272.6636347 | 147.92359648 | 107.9739081 | 220.858793   | 123.408978   | 0.2         | 0.726530612 | 2.04546601  | 1.03242521  | 1.03242521  |
| Q9XK51 | Plectin O5+Mus musculus OX10090 GN+Plec Pe1 S1v3 - [PLEC_MOUSE]                                                                              | Plec    | 232.3467437   | 108.448002  | 126.4641969 | 331.3396899 | 400.4306441 | 186.986617   | 155.7519142 | 319.5766503  | 66.94214348  | 127.117364  | 0.2         | 0.726530612 | 2.051831285 | 1.036911208 |
| Q9N148 | Non-POU domain-containing octamer-binding protein O5+Mus musculus OX10090 GN+Nomo Pe1 S1v3 - [NONO_MOUSE]                                    | Nomo    | 162.4947574   | 24.46818415 | 14.31654834 | 183.417856  | 189.7807071 | 47.71564765  | 67.16649651 | 138.4071377  | 80.8697822   | 83.74120761 | 0.2         | 0.726530612 | 2.058825529 | 1.042061529 |
| PE5745 | Acylphosphatase 2 O5+Mus musculus OX10090 GN+Acp2 Pe1 S1v2 - [ACP2_MOUSE]                                                                    | Acp2    | 31.92854892   | 12.44504226 | 0.349932116 | 34.82630717 | 22.19029521 | 14.79119573  | 30.4748258  | 16.6098199   | 17.659704521 | 0.2         | 0.726530612 | 2.060292097 | 1.028029209 |             |
| PE3280 | Sulmo-conjugating enzyme UBQ9 O5+Mus musculus OX10090 GN+Ubc9 Pe1 S1v1 - [UBC9_MOUSE]                                                        | Ubc9    | 319.8214348   | 44.81549972 | 90.00481785 | 422.922603  | 363.363675  | 206.357375   | 154.8137075 | 320.874023   | 145.5218249  | 108.832417  | 0.2         | 0.726530612 | 2.076515474 | 1.051477326 |
| Q9D819 | INMG-ninglymphosphatase O5+Mus musculus OX10090 GN+Ppa1 Pe1 S1v1 - [IPYR_MOUSE]                                                              | Ppa1    | 271.11551806  | 0           | 100.0523384 | 326.888481  | 292.0425065 | 152.6286135  | 123.7358397 | 257.1794845  | 137.1202544  | 92.2061214  | 0.2         | 0.726530612 | 2.078455887 | 1.055511219 |
| Q7M6Z3 | Serin/threonine-protein phosphatase 2A 65 kDa regulatory subunit A alpha isoform O5+Mus musculus OX10090 GN+Ppp2r1a Pe1 S1v3 - [2A_AA_MOUSE] | Ppp2r1a | 600.6020312   | 121.7524706 | 159.5743408 | 656.9643274 | 632.477433  | 399.2992488  | 260.5766575 | 542.3136697  | 208.7152787  | 176.5799489 | 0.2         | 0.726530612 | 2.083580677 | 1.059510766 |
| G6X450 | Ubiquitin-associated protein 2-like O5+Mus musculus OX10090 GN+Uba2 Pe1 S1v1 - [UBP2_MOUSE]                                                  | Uba2p1  | 64.33508887   | 23.21546567 | 0.737670952 | 76.01951585 | 62.69182641 | 29.5863126   | 54.82616579 | 32.758011899 | 24.3910448   | 0.2         | 0.726530612 | 2.084263639 | 1.059537677 |             |
| PE2267 | 40S ribosomal protein S23 O5+Mus musculus OX10090 GN+Rps23 Pe1 S1v3 - [RS23_MOUSE]                                                           | Rps23   | 74.92601153   | 38.80633124 | 35.17516748 | 111.0686227 | 73.52417181 | 47.96917009  | 100.1061217 | 62.35533994  | 23.13353868  | 0.2         | 0.726530612 | 2.086729659 | 1.061128832 |             |
| IA5376 | Aldo-keto reductase family 1 member B1 O5+Mus musculus OX10090 GN+Akr1b1 Pe1 S1v3 - [ALDR_MOUSE]                                             | Akr1b1  | 450.0913323   | 86.65851819 | 79.41328959 | 574.4820041 | 489.4504283 | 226.6352642  | 303.5097014 | 430.1904502  | 212.0093447  | 181.3800553 | 0.2         | 0.726530612 | 2.095245418 | 1.067173807 |
| PL7918 | Proliferating cell nuclear antigen O5+Mus musculus OX10090 GN+Pcna Pe1 S1v2 - [PCNA_MOUSE]                                                   | Pcna    | 333.5097014   | 128.1839379 | 142.0163443 | 427.7949889 | 557.7467496 | 287.3094441  | 201.2366609 | 424.2837275  | 114.7640104  | 155.2584802 | 0.2         | 0.726530612 | 2.108382871 | 1.076136192 |
| PI7427 | AP-2 complex subunit alpha-2 O5+Mus musculus OX10090 GN+A2p2 Pe1 S1v2 - [AP2A_MOUSE]                                                         | A2p2    | 103.21554609  | 27.45468005 | 34.40060061 | 25.56580051 | 152.9926665 | 69.0001346   | 54.89208115 | 115.8795365  | 41.64821965  | 42.78663483 | 0.2         | 0.726530612 | 2.11104285  | 1.077955863 |
| PI0630 | Eukaryotic initiation factor 4A-II O5+Mus musculus OX10090 GN+EIf4a2 Pe1 S1v2 - [IF4A_MOUSE]                                                 | EIf4a2  | 752.9289593   | 256.4145017 | 0.788799920 | 107.9913569 | 462.6881266 | 336.4782023  | 710.9913569 | 382.7917234  | 254.48325    | 0.2         | 0.726530612 | 2.123231996 | 1.079462407 |             |
| QB8G87 | Enolase-phosphatase E1 O5+Mus musculus OX10090 GN+Enoph1 Pe1 S1v1 - [ENOPH_MOUSE]                                                            | Enoph1  | 96.4174728    | 38.3198221  | 0.116270517 | 101.2944352 | 70.92852363 | 44.912485    | 94.94349213 | 85.4562829   | 21.5308545   | 0.2         | 0.726530612 | 2.113966576 | 1.079952566 |             |
| QBHG02 | CXXC motif containing zinc binding protein O5+Mus musculus OX10090 GN+Czib Pe1 S1v1 - [CZIB_MOUSE]                                           | Czib    | 128.3496768   | 33.2423703  | 26.8367195  | 161.017547  | 138.1123638 | 99.67909216  | 62.80958885 | 132.9366043  | 56.84967399  | 32.0022593  | 0.2         | 0.726530612 | 2.116501744 | 1.081681767 |
| QJ9146 | Diphosphoinositidyl phosphate phosphatases O5+Mus musculus OX10090 GN+Nudt3 Pe1 S1v1 - [NUDT3_MOUSE]                                         | Nudt3   | 69.36229322   | 0           | 45.88212281 | 68.95542005 | 88.8993413  | 87.74072347  | 38.1480534  | 81.8632616   | 53.27892505  | 11.19337237 | 0.2         | 0.726530612 | 2.131034138 | 1.091553702 |
| QJ9UR6 | Prolyl endopeptidase O5+Mus musculus OX10090 GN+Prep Pe1 S1v1 - [PRPE_MOUSE]                                                                 | Prep    | 288.2599122   | 56.51251877 | 72.48058722 | 386.2103734 | 348.4292633 | 156.2966697  | 139.0843394 | 296.999892   | 129.4363103  | 123.3033031 | 0.2         | 0.726530612 | 2.139534203 | 1.094502425 |
| QJ7M93 | Heterogeneous nuclear ribonucleoprotein Q O5+Mus musculus OX10090 GN+Sncprp Pe1 S1v2 - [HNRPQ_MOUSE]                                         | Sncprp  | 59.57170666   | 40.54766903 | 59.57170666 | 327.9371003 | 414.4050572 | 129.4947074  | 133.2464747 | 90.00211876  | 139.0490486  | 146.0771452 | 0.2         | 0.726530612 | 2.148757493 | 1.103526071 |
| QJ0D86 | Protein PBDCl1 O5+Mus musculus OX10090 GN+Pbdcl1 Pe1 S1v1 - [PBDCl1_MOUSE]                                                                   | Pbdcl1  | 49.27677045   | 11.07391757 | 14.02389966 | 67.75259958 | 63.11652804 | 24.1662244   | 23.08776178 | 50.0602611   | 18.31514072  | 22.7872297  | 0.2         | 0.726530612 | 2.149734697 | 1.111497369 |
| QB1121 | CRLP1-associated protein 2 O5+Mus musculus OX10090 GN+Cap2 Pe1 S1v1 - [CAP2_MOUSE]                                                           | Cap2    | 101.84746639  | 0           | 17.53029569 | 47.82055137 | 50.28078166 | 27.5571559   | 19.2925401  | 41.8850061   | 20.14816413  | 12.48847712 | 0.2         | 0.726530612 | 2.157059621 | 1.122381144 |
| PE3158 | High mobility group protein B1 O5+Mus musculus OX10090 GN+Hmgbl1 Pe1 S1v2 - [HMGBl1_MOUSE]                                                   | Hmgbl1  | 224.5908769   | 101.4006708 | 103.933175  | 242.369597  | 491.7194626 | 207.0136756  | 144.4282409 | 331.7009118  | 70.61202822  | 155.1788118 | 0.2         | 0.726530612 | 2.187162792 | 1.129060605 |
| Q9W17L | Acyl-protein thioesterase 2 O5+Mus musculus OX10090 GN+Lypa2 Pe1 S1v1 - [LYPA2_MOUSE]                                                        | Lypa2   | 422.4066333   | 84.07512846 | 116.4832826 | 513.2274737 | 599.8116458 | 251.139783   | 207.6549301 | 454.726008   | 186.6847523  | 181.5483611 | 0.2         | 0.726530612 | 2.130810326 | 1.130810326 |
| QZ0203 | Ubiquitin-like modifier-activating enzyme 1 O5+Mus musculus OX10090 GN+Ubl1 Pe1 S1v1 - [UBAL_MOUSE]                                          | Ubl1    | 480.5865064   | 111.6091214 | 122.8983609 | 605.0638690 | 521.303515  | 238.3466229  | 522.5359701 | 299.8462004  | 204.6048259  | 0.2         | 0.726530612 | 2.191406626 | 1.131857208 |             |
| Q9CWS0 | (N[6]-L)-dimethylarginine dimethylaminohydrolase 1 O5+Mus musculus OX10090 GN+Ddah1 Pe1 S1v3 - [DDAH1_MOUSE]                                 | Ddah1   | 100.7937937   | 99.22820084 | 366.1335174 | 126.617925  | 126.9585117 | 696.7569201  | 491.051705  | 107.489671   | 66.9861818   | 329.7275849 | 0.2         | 0.726530612 | 2.194248915 | 1.133777194 |
| Q9K85  | Phosphoserine aminotransferase O5+Mus musculus OX10090 GN+Psat1 Pe1 S1v1 - [SERC_MOUSE]                                                      | Psat1   | 594.1755341   | 144.4491758 | 135.6841723 | 756.8121705 | 793.7923691 | 383.2315358  | 249.1436294 | 644.6120252  | 262.2164982  | 227.1160583 | 0.2         | 0.726530612 | 2.211845396 | 1.145250547 |
| PE2452 | Macrophage-capping protein O5+Mus musculus OX10090 GN+Capg Pe1 S1v2 - [CAPG_MOUSE]                                                           | Capg    | 146.5579945   | 0           | 21.56416061 | 152.0174302 | 185.1475    | 35.10269393  | 56.4004335  | 124.0892081  | 79.1277496   | 78.82480672 | 0.2         | 0.726530612 | 2.214813241 | 1.146683460 |
| Q10B7  | Beta-2-microglobulin O5+Mus musculus OX10090 GN+B2m Pe1 S1v2 - [B2MG_MOUSE]                                                                  | B2m     | 530.4363671   | 540.9176341 | 1214.652577 | 2562.36731  | 1507.031544 | 997.542598   | 762.0020309 | 1688.980424  | 392.0416617  | 798.1215451 | 0.2         | 0.726530612 | 2.216503401 | 1.148283544 |
| PE2856 | Nucleosome assembly protein 1 like 1 O5+Mus musculus OX10090 GN+Nap1l1 Pe1 S1v2 - [NP1L1_MOUSE]                                              | Nap1l1  | 67.45165978   | 25.8953445  | 29.2347125  | 94.68519866 | 127.304262  | 51.03395689  | 40.8652518  | 91.80778064  | 23.0804496   | 38.26789387 | 0.2         | 0.726530612 | 2.227279267 | 1.152824462 |
| PE2116 | Eukaryotic translation initiation factor 3 subunit A O5+Mus musculus OX10090 GN+EIf3a Pe1 S1v5 - [EIf3A_MOUSE]                               | EIf3a   | 50.79436386   | 13.84461862 | 9.900714931 | 58.06345799 | 63.0130201  | 23.96901618  | 24.7655658  | 55.01515877  | 22.73890086  | 29.63979018 | 0.2         | 0.726530612 | 2.229485858 | 1.156687559 |
| Q9CPY7 | Cytosol aminopeptidase O5+Mus musculus OX10090 GN+Lap3 Pe1 S1v3 - [AMLP_MOUSE]                                                               | Lap3    | 281.1920314   | 71.7892665  | 98.5569222  | 432.2831041 | 408.1874584 | 166.7896101  | 150.5127634 | 335.7533908  | 113.9602172  | 146.8220673 | 0.2         | 0.726530612 | 2.23073036  | 1.157516138 |
| Q70251 | Elongation factor 1-beta O5+Mus musculus OX10090 GN+EIf1b Pe1 S1v5 - [E1B_MOUSE]                                                             | EIf1b   | 231.0707039   | 94.74396438 | 0.740380571 | 314.7334933 | 138.1699637 | 108.4088826  | 242.31382   | 116.1527706  | 92.45802096  | 0.2         | 0.726530612 | 2.231508888 | 1.157787643 |             |
| GE1704 | Inter-alpha-trypsin inhibitor heavy chain H3 O5+Mus musculus OX10090 GN+Ith3 Pe1 S1v3 - [ITH3_MOUSE]                                         | Ith3    | 0             | 20.54825353 | 12.1258989  | 23.72867701 | 32.79574986 | 16.9657366   | 10.89141414 | 24.4962716   | 10.32968051  | 7.942905561 | 0.2         | 0.726530612 | 2.249177723 | 1.169397374 |
| PE1082 | NEDD8-conjugating enzyme Ubc2m O5+Mus musculus OX10090 GN+Ubc2m Pe1 S1v1 - [UBC2_MOUSE]                                                      | Ubc2m   | 116.6076545   | 18.25526555 | 18.86096403 | 123.1644887 | 160.1087225 | 67.3777162   | 51.24129468 | 116.8836245  | 56.60973827  | 46.68347301 | 0.2         | 0.726530612 | 2.251621081 | 1.18969421  |
| Q60817 | Nascent polypeptide-associated complex subunit alpha O5+Mus musculus OX10090 GN+Naca Pe1 S1v1 - [NACA_MOUSE]                                 | Naca    | 158.7413240   | 39.73881322 | 0.17664292  | 92.962867   | 86.57454275 | 16.51899499  | 152.0939209 | 82.60315622  | 57.31979625  | 0.2         | 0.726530612 | 2.28883524  | 1.200933372 |             |
| Q93992 | Transaldolase O5+Mus musculus OX10090 GN+Taldol Pe1 S1v2 - [TALDO_MOUSE]                                                                     | Taldol  | 105.412382    | 29.85099885 | 332.5935644 | 1429.209699 | 1681.240139 | 728.1386996  | 555.756578  | 1279.52891   | 424.213229   | 493.8067095 | 0.2         | 0.726530612 | 2.203239928 | 1.203239928 |
| Q6ZC28 | Cullin-associated ned8-dissociated protein 1 O5+Mus musculus OX10090 GN+Cand1 Pe1 S1v2 - [CAND1_MOUSE]                                       | Cand1   | 112.3810137   | 23.2915619  | 25.73151391 | 124.4605538 | 160.6666267 | 66.67796315  | 53.80135665 | 123.391154   | 50.74613803  | 56.9962483  | 0.2         | 0.726530612 | 2.230568577 | 1.203870474 |
| Q61545 | RNA-binding protein EVS O5+Mus musculus OX10090 GN+Evsr1 Pe1 S1v2 - [EVS_MOUSE]                                                              | Evsr1   | 308.688251    | 119.737273  | 104.1583002 | 512.880424  | 480.657196  | 239.9274981  | 177.4802111 | 401.1515877  | 113.785913   | 149.1509864 | 0.2         | 0.726530612 | 2.242624995 | 1.211962587 |
| QZ1Q35 | Cullin-intra-axonal channel protein 1 O5+Mus musculus OX10090 GN+Clic1 Pe1 S1v3 - [CLIC1_MOUSE]                                              | Clic1   | 365.0922597   | 115.9275566 | 55.40941861 | 654.5204989 | 439.8095489 | 220.1426878  | 150.510968  | 125.9152196  | 122.0158249  | 0.2         | 0.726530612 | 2.219502859 | 1.219502859 |             |
| Q91230 | Valine--RNA ligase O5+Mus musculus OX10090 GN+Vars1 Pe1 S1v1 - [SYVC_MOUSE]                                                                  | Vars1   | 118.9376923   | 33.44813931 | 0.152002734 | 151.454466  | 82.8931389  | 50.7952774   | 118.7658318 | 61.33707027  | 57.06015382  | 0.2         | 0.726530612 | 2.338172148 | 1.22535553  |             |
| Q93305 | Serin/threonine-protein phosphatase 2A catalytic subunit alpha isoform O5+Mus musculus OX10090 GN+Ppp2ca Pe1 S1v1 - [PP2AA_MOUSE]            | Ppp2ca  | 226.4058384   | 57.07214055 | 0.283308885 | 242.8728323 | 144.3782159 | 102.4905276  | 237.1433122 | 115.323439   | 80.3372302   | 0.2         | 0.726530612 | 2.338671074 | 1.238671074 |             |

|        |                                                                                                                                                  |          |                |   |   |               |               |   |               |              |              |               |             |             |              |              |
|--------|--------------------------------------------------------------------------------------------------------------------------------------------------|----------|----------------|---|---|---------------|---------------|---|---------------|--------------|--------------|---------------|-------------|-------------|--------------|--------------|
| Q6N7V5 | Cleavage and polyadenylation specificity factor component 6 OS=Mus musculus OX10090 GN=Cpsf6 PE1 SV=1 - [CPSF_MOUSE]                             | Cpsf6    | 41,279,744,939 | 0 | 0 | 47,823,20233  | 45,997,54156  | 0 | 13,759,99148  | 31,271,98249 | 23,827,31554 | 27,097,79161  | 0.353678517 | 0.764125594 | 2,276,82727  | 1,184,399559 |
| Q91VRS | ATP-dependent RNA helicase DDX1 OS=Mus musculus OX10090 GN=Ddx1 PE1 SV=1 - [DDX1_MOUSE]                                                          | Ddx1     | 34,884,41656   | 0 | 0 | 39,103,880459 | 40,848,02456  | 0 | 11,628,15385  | 26,609,50742 | 20,140,55327 | 23,209,66924  | 0.353678517 | 0.764125594 | 2,291,64327  | 1,196,53131  |
| Q8BVV3 | Exosome complex component RRP4 OS=Mus musculus OX10090 GN=Exoc2 PE1 SV=1 - [EXO2_MOUSE]                                                          | Exoc2    | 12,937,7075    | 0 | 0 | 16,989,89859  | 13,218,2401   | 0 | 4,311,256835  | 10,659,64937 | 7,467,315882 | 8,921,975135  | 0.353678517 | 0.764125594 | 2,335,20465  | 1,235,80858  |
| Q9W7W6 | Cullin-1 OS=Mus musculus OX10090 GN=Cul1 PE1 SV=1 - [CUL1_MOUSE]                                                                                 | Cul1     | 24,134,34224   | 0 | 0 | 24,189,95407  | 28,364,46622  | 0 | 7,471,140799  | 17,518,16620 | 12,940,93545 | 15,314,1063   | 0.353678517 | 0.764125594 | 2,344,778042 | 1,229,451363 |
| Q6PAM1 | Alpha-taxilin OS=Mus musculus OX10090 GN=Txlna PE1 SV=1 - [TXLNA_MOUSE]                                                                          | Txlna    | 18,879,33131   | 0 | 0 | 16,081,87176  | 16,892,06965  | 0 | 4,626,443769  | 10,891,31747 | 8,012,335666 | 9,527,372861  | 0.353678517 | 0.764125594 | 2,375,758578 | 1,248,232329 |
| Q9C7N9 | Proteasome assembly chaperone 4 OS=Mus musculus OX10090 GN=Prng4 PE1 SV=1 - [PSMG4_MOUSE]                                                        | Prng4    | 36,773,45128   | 0 | 0 | 45,765,66445  | 40,653,52716  | 0 | 12,257,781739 | 9,832,54045  | 6,871,133201 | 8,800,85702   | 0.353678517 | 0.764125594 | 2,377,284122 | 1,249,324122 |
| Q9D662 | Protein transport protein Sec23B OS=Mus musculus OX10090 GN=Sec23b PE1 SV=1 - [SC23B_MOUSE]                                                      | Sec23b   | 133,450,9005   | 0 | 0 | 154,570,4099  | 164,730,0283  | 0 | 44,483,34531  | 106,434,9277 | 77,047,56694 | 92,315,5132   | 0.353678517 | 0.764125594 | 2,392,58814  | 1,256,62491  |
| Q9Z0R4 | Intersectin-1 OS=Mus musculus OX10090 GN=Itsn1 PE1 SV=1 - [ITSN1_MOUSE]                                                                          | Itsn1    | 47,705,40045   | 0 | 0 | 45,705,40045  | 44,394,71837  | 0 | 12,549,69806  | 30,033,4208  | 21,73671466  | 26,017,96192  | 0.353678517 | 0.764125594 | 2,393,158841 | 1,259,91562  |
| Q9CY76 | Adenylyl cyclase-associated protein 2 OS=Mus musculus OX10090 GN=Cap2 PE1 SV=1 - [CAP2_MOUSE]                                                    | Cap2     | 15,073,18674   | 0 | 0 | 16,825,56708  | 21,400,8815   | 0 | 52,349,5579   | 12,685,8594  | 9,062,3909   | 11,081,1895   | 0.353678517 | 0.764125594 | 2,424,079237 | 1,277,64858  |
| Q618R1 | DNA replication licensing factor MCM7 OS=Mus musculus OX10090 GN=Mcm7 PE1 SV=1 - [MCM7_MOUSE]                                                    | Mcm7     | 9,200,55521    | 0 | 0 | 10,820,02762  | 9,601,131345  | 0 | 3,066,885174  | 7,467,735848 | 5,312,000942 | 6,662,343508  | 0.353678517 | 0.764125594 | 2,434,957759 | 1,289,73645  |
| Q80897 | Copper transport protein ATOX1 OS=Mus musculus OX10090 GN=Atox1 PE1 SV=1 - [ATOX1_MOUSE]                                                         | Atox1    | 9,950,88549    | 0 | 0 | 10,138,296766 | 12,823,234    | 0 | 3,196,755133  | 18,040,00511 | 55,370,11626 | 68,150,98369  | 0.353678517 | 0.764125594 | 2,441,194904 | 1,287,87550  |
| Q8R010 | Aminocyclase RNA synthase complex-interacting multifunctional protein 2 OS=Mus musculus OX10090 GN=Aimp2 PE1 SV=2 - [AIMP2_MOUSE]                | Aimp2    | 23,849,57506   | 0 | 0 | 31,496,98834  | 26,881,80035  | 0 | 7,949,58834   | 19,544,66568 | 13,769,95588 | 17,004,31493  | 0.353678517 | 0.764125594 | 2,447,114622 | 1,291,100296 |
| Q9WUM3 | Coronin-1B OS=Mus musculus OX10090 GN=Coro1b PE1 SV=1 - [COR1B_MOUSE]                                                                            | Coro1b   | 109,466,2574   | 0 | 0 | 118,3983678   | 153,342,8293  | 0 | 36,554,4247   | 90,500,5686  | 68,314,84442 | 80,367,72545  | 0.353678517 | 0.764125594 | 2,477,993316 | 1,309,137422 |
| Q9D5C2 | Methyltransferase-like 25 OS=Mus musculus OX10090 GN=Metf26 PE1 SV=1 - [MTL26_MOUSE]                                                             | Metf26   | 11,901,51313   | 0 | 0 | 12,770,80222  | 12,236,69118  | 0 | 3,967,177101  | 9,832,54045  | 6,871,133201 | 8,800,85702   | 0.353678517 | 0.764125594 | 2,478,274727 | 1,309,451415 |
| Q3UE37 | Ubiquitin-conjugating enzyme E2 OS=Mus musculus OX10090 GN=Ube2j PE1 SV=2 - [UBE2J_MOUSE]                                                        | Ube2j    | 16,100,95758   | 0 | 0 | 21,544,10038  | 15,975,5987   | 0 | 5,766,06235   | 13,505,6445  | 9,295,86218  | 11,698,67139  | 0.353678517 | 0.764125594 | 2,497,975233 | 1,320,759173 |
| Q9D554 | Splicing factor 3A subunit 3 OS=Mus musculus OX10090 GN=Sf3a3 PE1 SV=2 - [SF3A3_MOUSE]                                                           | Sf3a3    | 29,446,25604   | 0 | 0 | 31,671,63881  | 42,755,8162   | 0 | 9,815,41868   | 24,809,5161  | 17,000,80385 | 22,188,6228   | 0.353678517 | 0.764125594 | 2,525,60937  | 1,337,750688 |
| Q9S564 | NPC intracellular cholesterol transporter 1 OS=Mus musculus OX10090 GN=Npc1 PE1 SV=2 - [NPC1_MOUSE]                                              | Npc1     | 57,191,35709   | 0 | 0 | 61,764,75404  | 68,084,1169   | 0 | 19,063,78569  | 48,277,2321  | 33,019,4454  | 42,031,0919   | 0.353678517 | 0.764125594 | 2,532,52631  | 1,340,058023 |
| P08556 | GPase Nras OS=Mus musculus OX10090 GN=Nras PE1 SV=1 - [RAS_MOUSE]                                                                                | Nras     | 61,320,5456    | 0 | 0 | 0             | 61,951,49739  | 0 | 10,480,01827  | 53,240,31381 | 35,403,34351 | 47,864,50947  | 0.353678517 | 0.764125594 | 2,5461,22835 | 1,348,30222  |
| P49443 | Protein phosphatase 1A OS=Mus musculus OX10090 GN=Ppm1a PE1 SV=1 - [PPM1A_MOUSE]                                                                 | Ppm1a    | 24,666,27014   | 0 | 0 | 27,913,68315  | 33,902,51123  | 0 | 8,222,24008   | 21,270,26479 | 14,241,33715 | 18,850,22778  | 0.353678517 | 0.764125594 | 2,587,137408 | 1,371,356681 |
| Q54774 | AP-3 complex subunit delta-1 OS=Mus musculus OX10090 GN=Ap3d1 PE1 SV=1 - [AP3D1_MOUSE]                                                           | Ap3d1    | 36,935,92598   | 0 | 0 | 38,790,24805  | 40,659,12886  | 0 | 10,211,97533  | 26,483,75279 | 17,687,6011  | 22,945,7026   | 0.353678517 | 0.764125594 | 2,599,39892  | 1,374,84441  |
| Q8B2A9 | Fructose-2,6-bisphosphate 3-phosphatase OS=Mus musculus OX10090 GN=Tiger PE1 SV=1 - [TIGER_MOUSE]                                                | Tiger    | 14,264,46646   | 0 | 0 | 16,856,29618  | 12,280,70721  | 0 | 4,754,822173  | 13,3615567   | 6,235,59588  | 10,837,36626  | 0.353678517 | 0.764125594 | 2,599,789482 | 1,378,394806 |
| Q9D352 | Dihydrodipicolinate residue succinyltransferase component of 2-oxoglutarate dehydrogenase complex, mitochondrial OS=Mus musculus OX10090 GN=Dhd1 | Dhd1     | 37,842,52275   | 0 | 0 | 58,006,29253  | 41,932,37506  | 0 | 12,514,71425  | 33,557,97463 | 21,848,93069 | 30,117,46128  | 0.353678517 | 0.764125594 | 2,628,32751  | 1,415,935559 |
| PL1358 | 60S ribosomal protein L27 OS=Mus musculus OX10090 GN=RpL27 PE1 SV=2 - [RL27_MOUSE]                                                               | RpL27    | 72,144,61963   | 0 | 0 | 87,793,83387  | 105,447,2449  | 0 | 24,042,0654   | 64,481,6299  | 41,652,71556 | 56,520,23556  | 0.353678517 | 0.764125594 | 2,681,351427 | 1,422,969316 |
| Q8K333 | Protein LZIC OS=Mus musculus OX10090 GN=Lzic PE1 SV=1 - [LZIC_MOUSE]                                                                             | Lzic     | 30,304,90849   | 0 | 0 | 33,304,90849  | 19,955,4041   | 0 | 6,566,826391  | 17,75343653  | 11,374,07695 | 16,761,2489   | 0.353678517 | 0.764125594 | 2,703,520591 | 1,434,830094 |
| Q9D967 | Magnesium-dependent phosphatase 1 OS=Mus musculus OX10090 GN=Mdp1 PE1 SV=1 - [MGDP1_MOUSE]                                                       | Mdp1     | 40,888,47606   | 0 | 0 | 63,745,64562  | 48,468,8677   | 0 | 13,629,49202  | 37,407,84078 | 23,606,92766 | 33,485,48396  | 0.353678517 | 0.764125594 | 2,746,424724 | 1,456,68009  |
| Q60854 | Serpin B6 OS=Mus musculus OX10090 GN=Serpinb6 PE1 SV=1 - [SFB6_MOUSE]                                                                            | Serpinb6 | 55,639,98132   | 0 | 0 | 70,618,67184  | 82,741,39613  | 0 | 18,546,62004  | 51,120,07876 | 32,123,58499 | 44,264,85169  | 0.353678517 | 0.764125594 | 2,756,321259 | 1,462,740047 |
| P97390 | Vacuolar protein sorting-associated protein 45 OS=Mus musculus OX10090 GN=Vps45 PE1 SV=1 - [VPS45_MOUSE]                                         | Vps45    | 16,276,79631   | 0 | 0 | 19,877,11399  | 15,499,02320  | 0 | 4,255,9877    | 11,790,05234 | 3,731,586933 | 10,441,8791   | 0.353678517 | 0.764125594 | 2,770,227071 | 1,470,004236 |
| Q9Z1X4 | Interleukin enhancer-binding factor 3 OS=Mus musculus OX10090 GN=Ilf3 PE1 SV=2 - [ILF3_MOUSE]                                                    | Ilf3     | 69,640,46747   | 0 | 0 | 96,316,46747  | 96,411,9905   | 0 | 23,201,3411   | 64,3619641   | 40,18590159  | 55,73918925   | 0.353678517 | 0.764125594 | 2,770,226254 | 1,472,006164 |
| Q9C2A2 | ATP-dependent (S)-NAD(P)H-hydrate dehydratase OS=Mus musculus OX10090 GN=Nad PE1 SV=1 - [NRRD_MOUSE]                                             | Nad      | 12,931,12421   | 0 | 0 | 19,087,93771  | 16,961,50122  | 0 | 4,310,374736  | 12,016,47928 | 7,465,78043  | 10,460,74877  | 0.353678517 | 0.764125594 | 2,787,803848 | 1,479,129056 |
| P42287 | Branched-chain-amino-acid aminotransferase, cytosolic OS=Mus musculus OX10090 GN=Bcat PE1 SV=2 - [BCAT1_MOUSE]                                   | Bcat     | 19,767,26597   | 0 | 0 | 57,404,08666  | 53,919,71729  | 0 | 13,255,75566  | 37,109,1997  | 22,996,4229  | 32,184,82959  | 0.353678517 | 0.764125594 | 2,799,478262 | 1,485,157978 |
| Q9K9Z8 | ADP-ribosylation factor GTPase-activating protein 2 OS=Mus musculus OX10090 GN=Arfgap2 PE1 SV=1 - [ARFG2_MOUSE]                                  | Arfgap2  | 14,944,48088   | 0 | 0 | 17,479,00837  | 24,482,54449  | 0 | 4,982,160429  | 13,897,70276 | 8,629,56479  | 11,629,92156  | 0.353678517 | 0.764125594 | 2,807,458371 | 1,489,924643 |
| Q8V819 | Tether containing UbX domain for GLUT4 OS=Mus musculus OX10090 GN=Asprc1 PE1 SV=1 - [ASPC1_MOUSE]                                                | Asprc1   | 10,551,42346   | 0 | 0 | 13,306,92150  | 16,391,5155   | 0 | 3,517,141154  | 8,994,24382  | 6,091,86717  | 7,101,672273  | 0.353678517 | 0.764125594 | 2,814,26224  | 1,492,94104  |
| Q8B022 | UPF0696 protein C1orf68 homolog OS=Mus musculus OX10090 GN=Bles03 PE1 SV=2 - [CKO68_MOUSE]                                                       | Bles03   | 18,803,62311   | 0 | 0 | 23,499,0774   | 21,466,0361   | 0 | 5,276,57474   | 14,988,4135  | 13,196,60627 | 13,020,16051  | 0.353678517 | 0.764125594 | 2,840,473576 | 1,506,131482 |
| Q4KMM3 | Oxidation resistance protein 1 OS=Mus musculus OX10090 GN=Orx1 PE1 SV=3 - [OKRX1_MOUSE]                                                          | Orx1     | 21,383,15566   | 0 | 0 | 38,918,8076   | 22,200,74469  | 0 | 7,127,70521   | 30,273,09408 | 12,345,54758 | 19,522,22456  | 0.353678517 | 0.764125594 | 2,858,156089 | 1,515,084707 |
| Q9C204 | COP9 signalosome complex subunit 7a OS=Mus musculus OX10090 GN=Cops7a PE1 SV=2 - [CNTNA_MOUSE]                                                   | Cops7a   | 17,162,90838   | 0 | 0 | 23,637,20256  | 25,352,00094  | 0 | 5,720,96946   | 16,235,52002 | 9,909,00074  | 14,192,32361  | 0.353678517 | 0.764125594 | 2,858,821447 | 1,518,242051 |
| Q6D229 | Eukaryotic translation initiation factor 3 subunit E OS=Mus musculus OX10090 GN=EIF3e PE1 SV=1 - [EIF3E_MOUSE]                                   | EIF3e    | 23,482,30692   | 0 | 0 | 31,648,73133  | 33,728,10616  | 0 | 7,827,43564   | 22,458,95916 | 13,575,51622 | 19,556,1324   | 0.353678517 | 0.764125594 | 2,869,248633 | 1,520,672999 |
| Q9JVL6 | Bifunctional polynucleotide phosphatase/kinase OS=Mus musculus OX10090 GN=Pnpk PE1 SV=2 - [PNPK_MOUSE]                                           | Pnpk     | 26,402,35126   | 0 | 0 | 26,402,35126  | 26,550,14939  | 0 | 6,128,43753   | 17,650,8436  | 10,606,80852 | 15,286,49626  | 0.353678517 | 0.764125594 | 2,893,28631  | 1,527,721221 |
| Q9DZ87 | F-box-like/WD repeat-containing protein TBLL3 OS=Mus musculus OX10090 GN=TBll3 PE1 SV=2 - [TBLL3_MOUSE]                                          | Tbll3    | 17,379,94739   | 0 | 0 | 102,499,5017  | 103,209,5518  | 0 | 23,790,3081   | 66,6346115   | 41,210,73823 | 59,439,93429  | 0.353678517 | 0.764125594 | 2,948,628347 | 1,528,85835  |
| Q9K2C8 | General transcription factor IIH OS=Mus musculus OX10090 GN=Gtf2i PE1 SV=3 - [GTF2I_MOUSE]                                                       | Gtf2i    | 34,237,67314   | 0 | 0 | 41,955,68944  | 53,831,7013   | 0 | 11,412,55771  | 32,933,8952  | 19,767,298   | 28,862,99814  | 0.353678517 | 0.764125594 | 2,953,59802  | 1,528,81231  |
| Q8R076 | Integrin-linked kinase-associated serine/threonine phosphatase 2C OS=Mus musculus OX10090 GN=Ilkapp PE1 SV=1 - [ILKAP_MOUSE]                     | Ilkapp   | 66,702,91219   | 0 | 0 | 11,014,70278  | 8,189,624,822 | 0 | 2,204,30074   | 6,394,65574  | 3,817,960876 | 5,717,7658925 | 0.353678517 | 0.764125594 | 2,980,06667  | 1,536,545424 |
| Q8U019 | Nuclear pore complex protein Nup214 OS=Mus musculus OX10090 GN=Nup214 PE1 SV=2 - [NUP214_MOUSE]                                                  | Nup214   | 48,268,34314   | 0 | 0 | 7,707,30303   | 4,601,12169   | 0 | 1,608,844771  | 4,707,25013  | 2,786,7409   | 4,124,704771  | 0.353678517 | 0.764125594 | 2,922,878527 | 1,547,388783 |
| Q9CR18 | Exportin-T OS=Mus musculus OX10090 GN=Xopt PE1 SV=3 - [XOPT_MOUSE]                                                                               | Xopt     | 13,328,66615   | 0 | 0 | 14,306,5342   | 21,838,6639   | 0 | 11,028,6715   | 12,048,3394  | 7,123,78757  | 11,092,98242  | 0.353678517 | 0.764125594 | 2,929,410599 | 1,550,610422 |
| Q5S060 | Thiopurine S-methyltransferase OS=Mus musculus OX10090 GN=Pmt PE1 SV=1 - [TPMT_MOUSE]                                                            | Pmt      | 34,711,06028   | 0 | 0 | 58,903,63242  | 47,076,5541   | 0 | 11,390,36889  | 33,658,6731  | 19,728,72882 | 30,402,6313   | 0.353678517 | 0.764125594 | 2,950,00778  | 1,563,161527 |
| Q9J2L6 | Dystonin OS=Mus musculus OX10090 GN=Dst PE1 SV=2 - [DYST_MOUSE]                                                                                  | Dst      | 9,302,09207    | 0 | 0 | 12,962,7239   | 14,771,       |   |               |              |              |               |             |             |              |              |

|        |                                                                                   |             |          |            |           |                 |         |              |   |   |              |             |             |              |              |             |             |             |             |             |
|--------|-----------------------------------------------------------------------------------|-------------|----------|------------|-----------|-----------------|---------|--------------|---|---|--------------|-------------|-------------|--------------|--------------|-------------|-------------|-------------|-------------|-------------|
| Q64331 | Unconventional myosin-VI                                                          | OX=Musculus | OX=10090 | GN=Myosin  | PE=1 Sv=1 | -[MYO6_MOUSE]   | Myo6    | 45.27151535  | 0 | 0 | 58.30078002  | 61.95222555 | 55.10951506 | 61.94151015  | 26.1375388   | 66.84421247 | 0.375825087 | 0.764125594 | 1.081790259 |             |
| Q70493 | Sorting nexin-12                                                                  | OX=Musculus | OX=10090 | GN=Snx12   | PE=1 Sv=1 | -[SNX12_MOUSE]  | Snx12   | 66.00982849  | 0 | 0 | 80.186580249 | 46.08110281 | 14.09657209 | 22.00327655  | 46.78118583  | 38.11079292 | 33.04017886 | 0.375825087 | 0.764125594 | 1.260999648 |
| Q8B940 | Lysophosphatidic acid phosphatase type 2                                          | OX=Musculus | OX=10090 | GN=AcP6    | PE=1 Sv=1 | -[PPA6_MOUSE]   | AcP6    | 17.05983611  | 0 | 0 | 98.396909111 | 17.8764729  | 93.5779338  | 51.9377772   | 123.1437245  | 76.90549292 | 48.18747959 | 0.375825087 | 0.764125594 | 1.110818909 |
| P62717 | 60S ribosomal protein L18a                                                        | OX=Musculus | OX=10090 | GN=Rpl18a  | PE=1 Sv=1 | -[RL18A_MOUSE]  | Rpl18a  | 10.64248007  | 0 | 0 | 69.51520252  | 123.9557429 | 33.22898083 | 34.748939356 | 75.56664083  | 60.40615684 | 45.66510286 | 0.375825087 | 0.764125594 | 1.166789528 |
| Q85U00 | Regulation of nuclear pore-mRNA export-containing protein 1B                      | OX=Musculus | OX=10090 | GN=Nrep1b  | PE=1 Sv=2 | -[RPR1B_MOUSE]  | Nrep1b  | 37.56640470  | 0 | 0 | 20.62399316  | 40.52359516 | 21.78268284 | 12.5201391   | 27.51193755  | 26.68876431 | 11.27456644 | 0.375825087 | 0.764125594 | 1.135591137 |
| P62317 | Small nuclear ribonucleoprotein Sm D2                                             | OX=Musculus | OX=10090 | GN=Snrdp2  | PE=1 Sv=1 | -[SMD2_MOUSE]   | Snrdp2  | 137.09158002 | 0 | 0 | 76.604106461 | 161.8203748 | 64.76550449 | 67.00548929  | 109.9498318  | 79.14981915 | 53.00823371 | 0.375825087 | 0.764125594 | 2.200020442 |
| P63073 | Eukaryotic translation initiation factor 4E                                       | OX=Musculus | OX=10090 | GN=Ef4e    | PE=1 Sv=1 | -[IFE4_MOUSE]   | Ef4e    | 17.9859109   | 0 | 0 | 191.3252619  | 130.3236037 | 75.69375623 | 59.65363033  | 132.4472164  | 103.321365  | 57.84502264 | 0.375825087 | 0.764125594 | 2.220191952 |
| P97351 | 40S ribosomal protein S3a                                                         | OX=Musculus | OX=10090 | GN=Rps3a   | PE=1 Sv=3 | -[RS3A_MOUSE]   | Rps3a   | 168.84779325 | 0 | 0 | 110.22281856 | 229.7841139 | 36.75574762 | 56.2829575   | 126.58798    | 97.48431846 | 67.4233851  | 0.375825087 | 0.764125594 | 2.153781699 |
| Q6A418 | Ubiquitin carboxyl-terminal hydrolase 7                                           | OX=Musculus | OX=10090 | GN=Usp7    | PE=1 Sv=1 | -[UBP7_MOUSE]   | Usp7    | 17.21471217  | 0 | 0 | 10.33829759  | 17.92575776 | 7.664559657 | 5.739157092  | 12.8761924   | 9.940511675 | 5.132518485 | 0.375825087 | 0.764125594 | 2.243568585 |
| P11103 | Poly [ADP-ribose] polymerase 1                                                    | OX=Musculus | OX=10090 | GN=Parp1   | PE=1 Sv=3 | -[PARP1_MOUSE]  | Parp1   | 64.55914463  | 0 | 0 | 52.07974565  | 80.6297680  | 12.74303368 | 21.51971488  | 48.4996681   | 37.27323953 | 34.10782129 | 0.375825087 | 0.764125594 | 2.253731803 |
| P70318 | Nucleolin                                                                         | OX=Musculus | OX=10090 | GN=Ti1a1   | PE=1 Sv=1 | -[TIAR_MOUSE]   | Ti1a1   | 11.1164059   | 0 | 0 | 91.46168102  | 122.4502107 | 45.11624311 | 31.70546685  | 86.633705069 | 65.30778742 | 38.91291525 | 0.375825087 | 0.764125594 | 2.289787232 |
| Q91V26 | Stromal membrane-associated protein 1                                             | OX=Musculus | OX=10090 | GN=Smap1   | PE=1 Sv=1 | -[SMAP1_MOUSE]  | Smap1   | 75.13331417  | 0 | 0 | 75.53105145  | 160.9207966 | 30.21217756 | 25.03777106  | 58.52134189  | 43.36669158 | 24.6821462  | 0.375825087 | 0.764125594 | 2.33732325  |
| P55012 | Solute carrier family 12 member 2                                                 | OX=Musculus | OX=10090 | GN=Slc22a2 | PE=1 Sv=2 | -[S12A_MOUSE]   | Slc22a2 | 46.50823278  | 0 | 0 | 51.44617634  | 30.2425225  | 27.20228328 | 15.50747246  | 36.29364384  | 26.85154072 | 13.20766697 | 0.375825087 | 0.764125594 | 2.341110918 |
| Q9BQ4  | Nicotinamide phosphoribosyltransferase                                            | OX=Musculus | OX=10090 | GN=Nampt   | PE=1 Sv=1 | -[NAMPT_MOUSE]  | Nampt   | 55.6101862   | 0 | 0 | 77.28093789  | 40.51710126 | 17.89646892 | 18.53673973  | 43.5672629   | 32.10655997 | 27.32442537 | 0.375825087 | 0.764125594 | 2.350040442 |
| Q7N7C4 | Putative RNA-binding protein Luc7-like 2                                          | OX=Musculus | OX=10090 | GN=Luc7l2  | PE=1 Sv=1 | -[LC7L2_MOUSE]  | Luc7l2  | 70.2284482   | 0 | 0 | 16.75576402  | 23.11042956 | 9.778657055 | 6.97420872   | 16.5488537   | 12.07980882 | 6.668381098 | 0.375825087 | 0.764125594 | 2.372840154 |
| P35880 | 60S ribosomal protein L18                                                         | OX=Musculus | OX=10090 | GN=Rpl18   | PE=1 Sv=3 | -[RL18_MOUSE]   | Rpl18   | 132.537567   | 0 | 0 | 94.30290626  | 167.415573  | 57.74473968 | 44.179189    | 106.4973586  | 76.52059988 | 55.87349127 | 0.375825087 | 0.764125594 | 2.410577471 |
| Q9QZ87 | Actin-related protein 10                                                          | OX=Musculus | OX=10090 | GN=Actr10  | PE=1 Sv=2 | -[ARP10_MOUSE]  | Actr10  | 19.8632526   | 0 | 0 | 15.56921148  | 24.92865697 | 7.02935766  | 6.621084198  | 16.13360411  | 11.46805243 | 5.26880885  | 0.375825087 | 0.764125594 | 2.436700837 |
| Q9Z122 | Serine-threonine kinase receptor-associated protein                               | OX=Musculus | OX=10090 | GN=Strap   | PE=1 Sv=2 | -[STRAP_MOUSE]  | Strap   | 10.05692893  | 0 | 0 | 90.52895284  | 117.0413641 | 45.10157765 | 34.2530977   | 44.22388859  | 59.4994589  | 38.38200248 | 0.375825087 | 0.764125594 | 2.451770766 |
| Q70305 | Ataxin-2                                                                          | OX=Musculus | OX=10090 | GN=Atxn2   | PE=1 Sv=1 | -[ATX2_MOUSE]   | Atxn2   | 25.66762897  | 0 | 0 | 29.08644772  | 23.65240095 | 10.30721803 | 8.558867632  | 21.01535557  | 14.81921249 | 9.663352073 | 0.375825087 | 0.764125594 | 2.456248711 |
| Q8C052 | Microtubule-associated protein 15                                                 | OX=Musculus | OX=10090 | GN=Map15   | PE=1 Sv=2 | -[MAP15_MOUSE]  | Map15   | 27.20473608  | 0 | 0 | 20.11109134  | 34.2297826  | 9.588632387 | 9.068245358  | 22.7265004   | 15.7066617  | 13.32698911 | 0.375825087 | 0.764125594 | 2.456460065 |
| QD1372 | Glycine amidotransferase-like class 1 domain-containing protein 3A, mitochondrial | OX=Musculus | OX=10090 | GN=Gat3a   | PE=1 Sv=1 | -[GAL3A_MOUSE]  | Gat3a   | 131.3136905  | 0 | 0 | 123.16581856 | 131.6779631 | 70.05049351 | 47.58679634  | 120.8495474  | 75.66878084 | 33.13913037 | 0.375825087 | 0.764125594 | 2.46832704  |
| Q91Y77 | YTH domain-containing family protein 1                                            | OX=Musculus | OX=10090 | GN=Ythd1   | PE=1 Sv=1 | -[YTHO2_MOUSE]  | Ythd1   | 75.27161535  | 0 | 0 | 55.97333271  | 86.91537378 | 49.04525375 | 26.10087116  | 61.84465341  | 45.21323105 | 19.69058358 | 0.375825087 | 0.764125594 | 2.484101061 |
| Q9CR86 | Calcium-regulated heat stable protein 1                                           | OX=Musculus | OX=10090 | GN=Carhp1  | PE=1 Sv=1 | -[CHSP1_MOUSE]  | Carhp1  | 10.41419885  | 0 | 0 | 16.474322    | 19.0175627  | 76.04252305 | 58.13996616  | 14.5117399   | 100.1701753 | 62.45362419 | 0.375825087 | 0.764125594 | 2.502783349 |
| Q91W50 | Cold shock domain-containing protein E1                                           | OX=Musculus | OX=10090 | GN=Cde1    | PE=1 Sv=1 | -[CSDO1_MOUSE]  | Cde1    | 30.47663445  | 0 | 0 | 28.83535654  | 34.8819712  | 11.86250059 | 10.13544818  | 25.4599471   | 15.5511211  | 11.34797985 | 0.375825087 | 0.764125594 | 2.518790526 |
| Q8K214 | Beta-mannosidase                                                                  | OX=Musculus | OX=10090 | GN=Manba   | PE=1 Sv=1 | -[MANBA_MOUSE]  | Manba   | 42.27418982  | 0 | 0 | 8.606120623  | 13.69995614 | 8.804514174 | 4.09136608   | 10.37049998  | 7.086506799 | 2.88512272  | 0.375825087 | 0.764125594 | 2.53479043  |
| P61750 | ADP-ribosylation factor 4                                                         | OX=Musculus | OX=10090 | GN=Arf4    | PE=1 Sv=2 | -[ARF4_MOUSE]   | Arf4    | 12.1613066   | 0 | 0 | 34.12908615  | 47.74042128 | 25.09529056 | 10.5412102   | 35.74902496  | 34.4122364  | 112.1038466 | 0.375825087 | 0.764125594 | 2.547012209 |
| Q6PE01 | U-5 small nuclear ribonucleoprotein 40 kDa protein                                | OX=Musculus | OX=10090 | GN=Snrnp40 | PE=1 Sv=1 | -[SNR40_MOUSE]  | Snrnp40 | 33.40645997  | 0 | 0 | 48.37411335  | 31.5471209  | 5.360668102 | 11.13549866  | 28.4273009   | 19.28724944 | 21.67577164 | 0.375825087 | 0.764125594 | 2.552853865 |
| Q9D6Y9 | 1,4-alpha-glucan-branching enzyme                                                 | OX=Musculus | OX=10090 | GN=Gbe1    | PE=1 Sv=1 | -[GLGB_MOUSE]   | Gbe1    | 34.3929147   | 0 | 0 | 15.14391714  | 45.3561259  | 28.83869551 | 11.4340291   | 27.7958851   | 19.81994244 | 15.12807843 | 0.375825087 | 0.764125594 | 2.602417292 |
| Q91W92 | Aminoacylase 1                                                                    | OX=Musculus | OX=10090 | GN=Acyl1   | PE=1 Sv=1 | -[ACY1_MOUSE]   | Acyl1   | 69.50726525  | 0 | 0 | 71.71149473  | 67.04941202 | 42.2127809  | 23.16908842  | 60.32305162  | 40.1300383  | 18.85693986 | 0.375825087 | 0.764125594 | 2.603600652 |
| Q8BM96 | Golgi resident protein GCP60                                                      | OX=Musculus | OX=10090 | GN=Gcp60   | PE=1 Sv=1 | -[GCP60_MOUSE]  | Gcp60   | 37.690737861 | 0 | 0 | 37.52822949  | 34.2425902  | 23.14885179 | 12.03243954  | 31.6237801   | 20.84081216 | 7.548470663 | 0.375825087 | 0.764125594 | 2.628205813 |
| Q9M0V2 | RNA-binding motif protein, X chromosome                                           | OX=Musculus | OX=10090 | GN=RbmX    | PE=1 Sv=1 | -[RBMX_MOUSE]   | RbmX    | 100.21378686 | 0 | 0 | 1029.591548  | 93.17125248 | 67.12139999 | 330.4548952  | 879.6202668  | 578.5840625 | 185.5543668 | 0.375825087 | 0.764125594 | 2.63361715  |
| P27601 | Guanine nucleotide-binding protein subunit alpha-13                               | OX=Musculus | OX=10090 | GN=Gna13   | PE=1 Sv=1 | -[GNA13_MOUSE]  | Gna13   | 188.14061    | 0 | 0 | 111.364007   | 177.5363293 | 207.780677  | 62.71353666  | 165.5919138  | 108.6203818 | 49.1335471  | 0.375825087 | 0.764125594 | 2.639462754 |
| P54823 | Protein-ATP-dependent RNA helicase DDX6                                           | OX=Musculus | OX=10090 | GN=Ddx6    | PE=1 Sv=1 | -[DDX6_MOUSE]   | Ddx6    | 112.2817739  | 0 | 0 | 114.8064484  | 112.813510  | 69.8658664  | 42.4272579   | 98.95176224  | 64.82591238 | 25.22340729 | 0.375825087 | 0.764125594 | 2.643821522 |
| P26638 | Serine--tRNA ligase, cytoplasmic                                                  | OX=Musculus | OX=10090 | GN=Sars1   | PE=1 Sv=3 | -[SYSX_MOUSE]   | Sars1   | 62.03626183  | 0 | 0 | 77.50771192  | 57.93587719 | 28.7139599  | 20.67875394  | 54.73482857  | 35.81665247 | 24.61948219 | 0.375825087 | 0.764125594 | 2.646911353 |
| Q9K951 | Plastin-3                                                                         | OX=Musculus | OX=10090 | GN=Pls3    | PE=1 Sv=1 | -[PLST3_MOUSE]  | Pls3    | 88.46099667  | 0 | 0 | 108.1145896  | 82.5915403  | 47.63546371 | 29.48699889  | 79.44719787  | 51.02798024 | 30.36192244 | 0.375825087 | 0.764125594 | 2.649913777 |
| Q9DC9C | Multifunctional methyltransferase subunit Trm112-like protein                     | OX=Musculus | OX=10090 | GN=Trm112  | PE=1 Sv=1 | -[TRM112_MOUSE] | Trm112  | 66.33511109  | 0 | 0 | 65.74253677  | 79.00380034 | 34.57281865 | 22.1110737   | 79.047545449 | 38.82989424 | 22.81097956 | 0.375825087 | 0.764125594 | 2.703299392 |
| Q9C080 | Vecular protein-sertifying-associated protein 25                                  | OX=Musculus | OX=10090 | GN=Vps25   | PE=1 Sv=1 | -[VPS25_MOUSE]  | Vps25   | 20.56518729  | 0 | 0 | 20.54589706  | 23.25899596 | 12.44986874 | 6.889397523  | 18.75148726  | 11.92364419 | 5.623399006 | 0.375825087 | 0.764125594 | 2.72394     |
| Q9DZ25 | Cytoplasmic subunit gamma-1                                                       | OX=Musculus | OX=10090 | GN=Cogp1   | PE=1 Sv=1 | -[COGP1_MOUSE]  | Cogp1   | 47.60820005  | 0 | 0 | 45.51811715  | 12.82281626 | 31.44879961 | 15.86940022  | 48.586338    | 125.9746235 | 79.9426308  | 0.375825087 | 0.764125594 | 2.726515281 |
| Q8K813 | Purified kinase                                                                   | OX=Musculus | OX=10090 | GN=PkaA    | PE=1 Sv=1 | -[PKOX_MOUSE]   | PkaA    | 25.70717945  | 0 | 0 | 25.70717945  | 24.768620   | 19.7738248  | 8.569059818  | 24.87367574  | 14.8204689  | 3.15468847  | 0.375825087 | 0.764125594 | 2.73932535  |
| P13707 | Glycine-3-phosphate dehydrogenase [NAD(+)], cytoplasmic                           | OX=Musculus | OX=10090 | GN=Gpd1    | PE=1 Sv=3 | -[GPOA_MOUSE]   | Gpd1    | 154.3422805  | 0 | 0 | 139.5561357  | 176.5184539 | 108.9597018 | 51.0474262   | 141.6858919  | 89.10955717 | 33.84136677 | 0.375825087 | 0.764125594 | 2.76593734  |
| Q9D868 | Peptidyl-prolyl cis-trans isomerase H                                             | OX=Musculus | OX=10090 | GN=Ppih    | PE=1 Sv=1 | -[PPIH_MOUSE]   | Ppih    | 73.17555428  | 0 | 0 | 72.24842508  | 65.99310277 | 49.97346347 | 24.38185143  | 67.49159991  | 42.24792956 | 15.6903231  | 0.375825087 | 0.764125594 | 2.766973249 |
| P90669 | Lysosomal alpha-glucosidase                                                       | OX=Musculus | OX=10090 | GN=Gaa     | PE=1 Sv=2 |                 |         |              |   |   |              |             |             |              |              |             |             |             |             |             |

|        |                                                                                                           |                 |         |                |               |                |                |               |              |              |              |               |                |             |             |              |             |
|--------|-----------------------------------------------------------------------------------------------------------|-----------------|---------|----------------|---------------|----------------|----------------|---------------|--------------|--------------|--------------|---------------|----------------|-------------|-------------|--------------|-------------|
| P51655 | Glypican-4 OS=Mus musculus OX10090 GN=Cpca PE1 Sv1-2                                                      | [GPC4_MOUSE]    | Cpca    | 42,445,746,614 | 26,275,551,24 | 29,196,903,992 | 29,081,108,663 | 44,940,595,75 | 31.29202001  | 34.40590277  | 9.675490063  | 9.123461551   | 0.4            | 0.761425594 | 1.099500534 | 0.136848305  |             |
| QB8ND5 | Sulphydryl oxidase 1 OS=Mus musculus OX10090 GN=Qsox1 PE1 Sv1-2                                           | [SQSOX_MOUSE]   | Qsox1   | 100,400,8292   | 132,580,897   | 102,140,4454   | 107,131,3328   | 135,026,576   | 111,575,0075 | 123,597,975  | 128,229,2367 | 14,614,12561  | 0.4            | 0.761425594 | 1.107765624 | 0.147460887  |             |
| QB8F76 | Perflin OS=Mus musculus OX10090 GN=Perfl1 PE1 Sv1-1                                                       | [PERF1_MOUSE]   | Perfl1  | 40,467,00162   | 38,471,307    | 47,267,35316   | 52,495,62169   | 55,800,23469  | 43,028,2849  | 49,132,68619 | 4,492,164139 | 8,842,067372  | 0.4            | 0.761425594 | 1.132015629 | 0.178893876  |             |
| P74911 | 60S ribosomal protein L6 OS=Mus musculus OX10090 GN=R6pL PE1 Sv1-3                                        | [RL6_MOUSE]     | R6pL    | 32,630,98019   | 78,912,26766  | 81,159,87156   | 100,792,8511   | 142,054,4538  | 88,550,17101 | 97,506,60475 | 110,465,972  | 30,742,5512   | 28,033,08117   | 0.4         | 0.761425594 | 1.132728181  | 0.179228447 |
| T01933 | Leucine-rich repeats and immunoglobulin-like domains protein 1 OS=Mus musculus OX10090 GN=Lrig1 PE1 Sv1-2 | [LRIG1_MOUSE]   | Lrig1   | 38,528,20451   | 59,210,7848   | 32,952,96669   | 43,015,15299   | 34,210,7525   | 34,688,62909 | 32,460,1656  | 37,398,20813 | 6,322,875,991 | 4,872,740,6265 | 0.4         | 0.761425594 | 1.151808559  | 0.204127641 |
| Q04857 | Collagen alpha-1(VI) chain OS=Mus musculus OX10090 GN=C6a1 PE1 Sv1-1                                      | [C6A1_MOUSE]    | C6a1    | 143,122,7179   | 212,195,7546  | 212,465,886    | 176,546,6908   | 215,559,235   | 215,048,7291 | 189,255,0047 | 218,283,745  | 39,905,8365   | 39,42,75,4821  | 0.4         | 0.761425594 | 1.153388897  | 0.205877723 |
| Q9W7P5 | Adenylate kinase 2, mitochondrial OS=Mus musculus OX10090 GN=AK2 PE1 Sv1-5                                | [KAD2_MOUSE]    | AK2     | 571,213,8567   | 325,188,342   | 318,996,4943   | 585,309,0075   | 408,487,5209  | 478,975,2659 | 405,132,8884 | 470,419,798  | 14,836,5636   | 131,15,83218   | 0.4         | 0.761425594 | 1.161201149  | 0.215621593 |
| P26040 | Ezrin OS=Mus musculus OX10090 GN=Ezr PE1 Sv1-3                                                            | [EZR_MOUSE]     | Ezr     | 170,0,529504   | 100,188,707   | 118,146,7964   | 162,108,2991   | 174,197,3659  | 126,114,4367 | 137,395,932  | 1541,400,339 | 325,689,028   | 250,123,2616   | 0.4         | 0.761425594 | 1.161221704  | 0.215643443 |
| P26043 | Radinix OS=Mus musculus OX10090 GN=Rdx PE1 Sv1-3                                                          | [RAD1_MOUSE]    | Rdx     | 170,0,529504   | 100,188,707   | 118,146,7964   | 162,108,2991   | 174,197,3659  | 126,114,4367 | 137,395,932  | 1541,400,339 | 325,689,028   | 250,123,2616   | 0.4         | 0.761425594 | 1.161221704  | 0.215643443 |
| P14869 | 60S acidic ribosomal protein P0 OS=Mus musculus OX10090 GN=Rplp0 PE1 Sv1-3                                | [RLA0_MOUSE]    | Rplp0   | 142,405,3079   | 72,437,96647  | 70,471,71987   | 113,104,7473   | 143,924,2456  | 76,037,41677 | 95,106,8811  | 111,022,1366 | 40,973,2465   | 33,991,29791   | 0.4         | 0.761425594 | 1.1623226687 | 0.223715109 |
| P50543 | Protein S100-A11 OS=Mus musculus OX10090 GN=S100a11 PE1 Sv1-1                                             | [S10A8_MOUSE]   | S100a11 | 55,695,82033   | 262,400,2385  | 278,798,6384   | 374,972,7626   | 604,506,6457  | 311,395,6287 | 366,952,2624 | 400,309,679  | 167,089,1983  | 154,271,5818   | 0.4         | 0.761425594 | 1.172684841  | 0.229782899 |
| QB9R02 | Collagen-prolysin-2-oxoglutarate 5-dioxygenase 1 OS=Mus musculus OX10090 GN=P1od1 PE1 Sv1-1               | [P1OD1_MOUSE]   | P1od1   | 25,122,66728   | 22,100,16324  | 29,148,26366   | 28,194,73475   | 322,553,678   | 291,428,8626 | 281,974,259  | 291,688,266  | 35,860,04484  | 21,122,263196  | 0.4         | 0.761425594 | 1.174389423  | 0.231919343 |
| QB9R02 | Glycogen-1 OS=Mus musculus OX10090 GN=Gy1 PE1 Sv1-3                                                       | [GY1_MOUSE]     | Gy1     | 104,925,9696   | 57,700,21371  | 50,018,01152   | 64,709,20957   | 124,599,4659  | 63,101,58217 | 70,884,0464  | 94,125,4475  | 29,308,6688   | 35,048,62725   | 0.4         | 0.761425594 | 1.186944385  | 0.247252338 |
| P06797 | Procathepsin 1 OS=Mus musculus OX10090 GN=Cat1 PE1 Sv1-2                                                  | [CAT1_MOUSE]    | Cat1    | 441,844,1612   | 725,729,0157  | 689,435,9581   | 666,509,1139   | 838,873,0544  | 830,364,3267 | 619,015,9596 | 75,248,827   | 154,501,8842  | 154,851,5864   | 0.4         | 0.761425594 | 1.203925772  | 0.267474445 |
| Q9Q206 | Toll-like receptor 1 OS=Mus musculus OX10090 GN=TL1pp PE1 Sv1-1                                           | [TOL1P_MOUSE]   | TL1pp   | 80,718,85091   | 45,003,91779  | 52,672,80853   | 64,214,81118   | 60,491,20240  | 63,272,28248 | 49,824,9954  | 51,668,7595  | 18,802,5208   | 16,351,62265   | 0.4         | 0.761425594 | 1.206935703  | 0.269357030 |
| Q9CKWA | 60S ribosomal protein L11 OS=Mus musculus OX10090 GN=Rpl11 PE1 Sv1-1                                      | [RL1_MOUSE]     | Rpl11   | 214,950,7302   | 90,492,9211   | 96,059,1455    | 140,893,8084   | 204,141,6533  | 102,010,4545 | 133,842,626  | 131,310,6564 | 70,340,03069  | 71,730,1291    | 0.4         | 0.761425594 | 1.205345855  | 0.269433675 |
| P26230 | Small nuclear ribonucleoprotein Sm D3 OS=Mus musculus OX10090 GN=Snrpd PE1 Sv1-1                          | [SMD3_MOUSE]    | Snrpd3  | 192,252,9236   | 119,504,1228  | 88,179,57375   | 143,818,8113   | 206,187,6811  | 132,304,8631 | 133,312,1027 | 160,769,478  | 53,393,0114   | 39,752,18771   | 0.4         | 0.761425594 | 1.205962109  | 0.270184579 |
| Q91V77 | Microtubule-associated protein 1A/1B light chain 3A OS=Mus musculus OX10090 GN=Map1l3a PE1 Sv1-1          | [MAP13_MOUSE]   | Map1l3a | 75,622,3443    | 87,846,2207   | 52,875,1032    | 82,720,7289    | 80,27651,369  | 88,748,85217 | 72,447,8257  | 87,986,9919  | 17,209,625    | 9,978,96843    | 0.4         | 0.761425594 | 1.206367469  | 0.27066943  |
| QB872  | CKN2A-interacting protein OS=Mus musculus OX10090 GN=Ckn2aip PE1 Sv1-1                                    | [CARF_MOUSE]    | Ckn2aip | 9,494,86603    | 7,384,27237   | 5,21457,3956   | 7,456,172983   | 8,991,77592   | 10,288,5423  | 7,344,244008 | 9,312,60513  | 21,400,02498  | 1,417,862,2419 | 0.4         | 0.761425594 | 1.21061114   | 0.275199164 |
| Q9EQX4 | Signal transducer protein 1-like OS=Mus musculus OX10090 GN=Stp1 PE1 Sv1-1                                | [AIF1_MOUSE]    | Aif1    | 55,445,74333   | 50,725,03399  | 24,634,64698   | 60,849,79953   | 36,606,44359  | 37,603,00443 | 36,944,35177 | 45,019,98631 | 16,310,8485   | 13,731,80179   | 0.4         | 0.761425594 | 1.21886717   | 0.285209879 |
| P15646 | Spectrin alpha chain, non-erythrocytic OS=Mus musculus OX10090 GN=Spn1 PE1 Sv1-1                          | [SPTN1_MOUSE]   | Spn1    | 197,103,0226   | 142,200,6273  | 138,870,7143   | 193,696,1745   | 246,776,9875  | 145,377,2776 | 159,391,9877 | 794,736814   | 32,701,33454  | 49,528,0055    | 0.4         | 0.761425594 | 1.222147423  | 0.288466534 |
| P40240 | C99 antigen OS=Mus musculus OX10090 GN=C99 PE1 Sv1-2                                                      | [C99_MOUSE]     | C99     | 42,222,96692   | 545,221,9556  | 940,078082     | 598,144,2985   | 714,500,1234  | 1028,09,7219 | 671,892,2016 | 780,691752   | 286,193,6463  | 222,193,9566   | 0.4         | 0.761425594 | 1.22932122   | 0.319533433 |
| P20029 | Endoplasmic reticulum chaperone BiP OS=Mus musculus OX10090 GN=Hspa5 PE1 Sv1-3                            | [BiP_MOUSE]     | Hspa5   | 288,252,6759   | 166,747,4623  | 156,346,149    | 290,427,7729   | 268,677,9614  | 187,234,515  | 302,15854    | 248,913,881  | 79,035,2199   | 54,931,7874    | 0.4         | 0.761425594 | 1.224271523  | 0.291923559 |
| G16100 | Laminin subunit alpha-5 OS=Mus musculus OX10090 GN=Lama5 PE1 Sv1-4                                        | [LAMA5_MOUSE]   | Lama5   | 50,553,21867   | 50,974,88432  | 38,952,95618   | 43,152,27439   | 58,134,6905   | 70,566,1788  | 46,828,5547  | 57,347,5737  | 62,855,1502   | 131,818,9731   | 0.4         | 0.761425594 | 1.22438466   | 0.292434666 |
| P14211 | Calreticulin OS=Mus musculus OX10090 GN=Calr PE1 Sv1-1                                                    | [CALR_MOUSE]    | Calr    | 123,827,5251   | 77,883,05027  | 102,357,1771   | 147,138,0623   | 137,847,8484  | 88,057,6919  | 110,358,265  | 124,347,868  | 22,988,6435   | 31,769,6341    | 0.4         | 0.761425594 | 1.226847943  | 0.294952747 |
| QB8R16 | Bleomycin hydrolase OS=Mus musculus OX10090 GN=Blmh PE1 Sv1-1                                             | [BLMH_MOUSE]    | Blmh    | 480,773,585    | 241,935,219   | 285,219,8199   | 488,366,368    | 508,270,6229  | 241,721,6902 | 335,673,0091 | 412,786,271  | 127,585,1785  | 148,480,1389   | 0.4         | 0.761425594 | 1.229731510  | 0.298324175 |
| QB8R05 | Cleavage stimulation factor subunit 2 OS=Mus musculus OX10090 GN=Cstf2 PE1 Sv1-2                          | [CSTF2_MOUSE]   | Cstf2   | 68,888,45283   | 38,778,62957  | 54,959,97797   | 62,037,86731   | 77,417,39501  | 60,987,68901 | 54,208,07192 | 66,814,30511 | 15,069,1241   | 9,197,515023   | 0.4         | 0.761425594 | 1.23253837   | 0.30163256  |
| QB8E43 | Meteorin-like protein OS=Mus musculus OX10090 GN=Metrl PE1 Sv1-1                                          | [METRL_MOUSE]   | Metrl   | 34,496,48019   | 32,651,978    | 33,465,34776   | 46,339,7229    | 46,897,7614   | 56,534,3306  | 40,270,4468  | 49,3237603   | 11,522,2861   | 7,317,78324    | 0.4         | 0.761425594 | 1.231271457  | 0.312374256 |
| Q62179 | Semaphorin-4B OS=Mus musculus OX10090 GN=Sem4b PE1 Sv1-2                                                  | [SEM4B_MOUSE]   | Sem4b   | 384,019,0951   | 262,116,338   | 155,204,4182   | 162,661,1284   | 268,511,7023  | 317,514,1203 | 200,445,884  | 249,562,317  | 55,371,40648  | 79,1465,2032   | 0.4         | 0.761425594 | 1.24505877   | 0.316187316 |
| QB8V3  | V-type proton ATPase subunit h OS=Mus musculus OX10090 GN=Atpvh1 PE1 Sv1-1                                | [VATH_MOUSE]    | Atpvh1  | 36,774,69263   | 19,464,2523   | 22,513,7127    | 26,396,21038   | 38,044,0387   | 33,650,9452  | 26,250,8854  | 32,998,1237  | 9,240,54568   | 5,882,463225   | 0.4         | 0.761425594 | 1.245600363  | 0.316841269 |
| P97820 | Nitrogen-activated protein kinase kinase kinase 4 OS=Mus musculus OX10090 GN=Nkapk4 PE1 Sv1-1             | [MKK4_MOUSE]    | Nkapk4  | 42,714,52226   | 35,744,97913  | 12,523,7297    | 20,325,3376    | 45,789,26373  | 46,677,93739 | 30,327,68219 | 37,795,6219  | 18,407,40679  | 14,617,61484   | 0.4         | 0.761425594 | 1.246241752  | 0.317839597 |
| P10637 | Microtubule-associated protein tau OS=Mus musculus OX10090 GN=Mapt PE1 Sv1-3                              | [TAU_MOUSE]     | Mapt    | 143,189,0418   | 123,083,159   | 121,987,8409   | 182,028,8136   | 183,915,1411  | 232,238,269  | 159,750,6455 | 199,393,6105 | 47,187,1517   | 28,455,2939    | 0.4         | 0.761425594 | 1.248155273  | 0.319797149 |
| Q70493 | Syntaxin-7 OS=Mus musculus OX10090 GN=Stx7 PE1 Sv1-3                                                      | [STX7_MOUSE]    | Stx7    | 62,429,9791    | 43,737,14863  | 39,182,6794    | 73,008,8461    | 65,548,310    | 44,363,3426  | 48,486,9591  | 60,640,0762  | 12,319,2547   | 15,119,99705   | 0.4         | 0.761425594 | 1.251760439  | 0.323778911 |
| P1982  | 14-3-3 protein gamma OS=Mus musculus OX10090 GN=Ywhag PE1 Sv1-2                                           | [143GG_MOUSE]   | Ywhag   | 6612,318446    | 3300,968091   | 3257,205,211   | 6710,997423    | 5901,441187   | 3888,515177  | 4390,13617   | 5500,31819   | 1924,56667    | 1453,367352    | 0.4         | 0.761425594 | 1.252873069  | 0.32524062  |
| Q9Z1D1 | Eukaryotic translation initiation factor 3 subunit G OS=Mus musculus OX10090 GN=EIF3g PE1 Sv1-2           | [EIF3G_MOUSE]   | EIF3g   | 157,744,946    | 64,634,7368   | 121,630,5268   | 155,847,865    | 161,809,624   | 151,898,9164 | 124,673,6497 | 156,518,579  | 31,616,16079  | 9,989,65705    | 0.4         | 0.761425594 | 1.254262629  | 0.328177301 |
| P29533 | Vascular cell adhesion protein 1 OS=Mus musculus OX10090 GN=Vcam1 PE1 Sv1-3                               | [VCAM1_MOUSE]   | Vcam1   | 78,401,3883    | 90,417,22809  | 93,324,07417   | 130,361,4644   | 109,576,6073  | 89,353,70316 | 87,38314703  | 109,763,8916 | 7,907,307865  | 20,504,5228    | 0.4         | 0.761425594 | 1.256121198  | 0.328976566 |
| Q9CQV8 | 14-3-3 protein beta/alpha OS=Mus musculus OX10090 GN=Ywhab PE1 Sv1-3                                      | [143BB_MOUSE]   | Ywhab   | 6612,31844     | 3282,99818    | 3247,324,239   | 6710,997423    | 5925,42004    | 3888,515177  | 4800,88029   | 5508,31088   | 192,564,447   | 1456,738325    | 0.4         | 0.761425594 | 1.253735222  | 0.330389392 |
| P79914 | CK1-like protein OS=Mus musculus OX10090 GN=Ckl1 PE1 Sv1-2                                                | [CKRL_MOUSE]    | Ckl1    | 175,272,7201   | 82,815,9267   | 83,685,8408    | 179,971,9523   | 162,959,8085  | 87,4721,4473 | 113,424,607  | 143,434,251  | 54,130,3371   | 49,196,6001    | 0.4         | 0.761425594 | 1.253240063  | 0.332505305 |
| QB8F98 | PK4 and SFK1-interacting protein OS=Mus musculus OX10090 GN=Isp1 PE1 Sv1-1                                | [ISP1_MOUSE]    | Isp1    | 107,216,4075   | 73,818,83695  | 77,1037,1728   | 106,180,1112   | 129,524,2188  | 69,470,2831  | 395,600,1546 | 408,532,914  | 18,407,40679  | 20,286,6211    | 0.4         | 0.761425594 | 1.255024163  | 0.332551553 |
| B65510 | 14-3-3 protein eta OS=Mus musculus OX10090 GN=Ywhab PE1 Sv1-2                                             | [143FE_MOUSE]   | Ywhab   | 6612,31844     | 3282,99818    | 3247,324,239   | 6710,997423    | 5901,441187   | 3888,515177  | 4390,13617   | 5500,31819   | 1924,56667    | 1453,367352    | 0.4         | 0.761425594 | 1.259287909  | 0.332654904 |
| B61226 | Ras-related protein Rap-2b OS=Mus musculus OX10090 GN=Rap2b PE1 Sv1-1                                     | [RAP2B_MOUSE]</ |         |                |               |                |                |               |              |              |              |               |                |             |             |              |             |

|        |                                                                                                                                         |         |             |             |              |             |             |              |              |              |             |              |             |             |              |             |
|--------|-----------------------------------------------------------------------------------------------------------------------------------------|---------|-------------|-------------|--------------|-------------|-------------|--------------|--------------|--------------|-------------|--------------|-------------|-------------|--------------|-------------|
| Q99K8  | Dynactin subunit 2 OS=Mus musculus OX10090 GN=Octp2 Pe1 S=1V-3 [DCTN2_MOUSE]                                                            | Dctn2   | 45.76527343 | 51.79905048 | 22.58407962  | 93.06062538 | 99.21307593 | 52.92483848  | 56.71613451  | 81.73269492  | 86.8375497  | 52.15766632  | 0.4         | 0.764125594 | 1.441083654  | 0.527154095 |
| P2349E | Purine nucleoside phosphorylase OS=Mus musculus OX10090 GN=Pnp Pe1 S=1V-3 [PNPH_MOUSE]                                                  | Pnp     | 227.1305996 | 87.35116353 | 123.2189091  | 258.7869465 | 255.4587669 | 118.1749799  | 145.9335844  | 210.8609878  | 72.5819371  | 80.2388519   | 0.4         | 0.764125594 | 1.444539895  | 0.53601138  |
| QJ9MH6 | Thioredoxin reductase 1, cytoplasmic OS=Mus musculus OX10090 GN=Trp1 Pe1 S=1V-3 [TRXR1_MOUSE]                                           | Txnrd1  | 431.6084576 | 216.5552523 | 239.6860634  | 525.7939635 | 326.4236038 | 295.9439244  | 427.626379   | 118.0559176  | 99.71965777 | 0.4          | 0.764125594 | 1.444957453 | 0.531027013  |             |
| Q04447 | Creatine kinase B-type OS=Mus musculus OX10090 GN=Ckb Pe1 S=1V-3 [CKRB_MOUSE]                                                           | Ckb     | 20243.68374 | 10947.56139 | 13641.74795  | 23384.86097 | 27949.47509 | 14783.20649  | 14944.3312   | 21605.84835  | 472.9920004 | 7395.398185  | 0.4         | 0.764125594 | 1.445754544  | 0.531823545 |
| P00312 | T-complex protein 1 subunit eta OS=Mus musculus OX10090 GN=C7 Pe1 S=1V-1 [TCHP_MOUSE]                                                   | Cct7    | 340.2856571 | 104.8501335 | 137.8887674  | 370.3109396 | 308.690526  | 168.8207257  | 195.014551   | 282.6107771  | 128.6091669 | 1703.2483399 | 0.4         | 0.764125594 | 1.446200266  | 0.535257611 |
| Q83H49 | Selenide, water dikinase 1 OS=Mus musculus OX10090 GN=Sep1 Pe1 S=1V-1 [SPS1_MOUSE]                                                      | Sep1    | 101.6754512 | 58.7440033  | 61.14485011  | 170.0836756 | 191.9400979 | 151.2293505  | 103.6474682  | 151.078968   | 76.06441537 | 52.97580756  | 0.4         | 0.764125594 | 1.445488462  | 0.540700651 |
| Q64727 | Vinculin OS=Mus musculus OX10090 GN=Vcl Pe1 S=1V-4 [VINC_MOUSE]                                                                         | Vcl     | 290.7302627 | 105.3072556 | 105.7425517  | 263.6433515 | 325.614724  | 180.7304468  | 177.02669    | 259.961741   | 100.5157359 | 77.50652401  | 0.4         | 0.764125594 | 1.461254487  | 0.547207454 |
| Q61316 | Heat shock 70 kDa protein 4 OS=Mus musculus OX10090 GN=HspA4 Pe1 S=1V-1 [HSP74_MOUSE]                                                   | HspA4   | 552.7324569 | 226.3097806 | 167.2268778  | 575.6308666 | 520.6577430 | 286.9898228  | 35.4530314   | 461.0928111  | 207.6902028 | 153.2625165  | 0.4         | 0.764125594 | 1.4615463206 | 0.547632036 |
| P70202 | Lactin OS=Mus musculus OX10090 GN=Lxn Pe1 S=1V-2 [LXN_MOUSE]                                                                            | Lxn     | 547.3276417 | 103.6517198 | 192.9357573  | 358.4719328 | 70.80428655 | 492.2057133  | 353.2977789  | 517.1735039  | 179.6100487 | 172.5456659  | 0.4         | 0.764125594 | 1.463848586  | 0.549763685 |
| P45591 | Coflin-2 OS=Mus musculus OX10090 GN=Cf2 Pe1 S=1V-1 [COF2_MOUSE]                                                                         | Cf2     | 2785.803637 | 1028.443345 | 1168.287478  | 2993.308857 | 2746.006923 | 1593.3500237 | 1660.84482   | 2444.221929  | 976.7488675 | 747.1792507  | 0.4         | 0.764125594 | 1.471673873  | 0.554582002 |
| Q61879 | Myosin-10 OS=Mus musculus OX10090 GN=Myh10 Pe1 S=1V-1 [MYH10_MOUSE]                                                                     | Myh10   | 128.657968  | 64.2242886  | 86.75551045  | 168.2998218 | 125.9230419 | 91.14062641  | 107.2288281  | 128.544567   | 95.96418492 | 38.64183684  | 0.4         | 0.764125594 | 1.472889383  | 0.55649085  |
| Q8BIV4 | Dihydropteridine reductase OS=Mus musculus OX10090 GN=Dqdr Pe1 S=1V-2 [DHPR_MOUSE]                                                      | Dqdr    | 221.2214159 | 86.91028158 | 82.69137694  | 219.8767475 | 236.4572143 | 121.4099979  | 130.2886248  | 192.5872866  | 78.51405272 | 62.1976106   | 0.4         | 0.764125594 | 1.478158873  | 0.56380136  |
| Q3LV17 | BAG family molecular chaperone regulator 3 OS=Mus musculus OX10090 GN=Bag3 Pe1 S=1V-2 [BAG3_MOUSE]                                      | Bag3    | 68.4637929  | 30.68211772 | 61.65861721  | 88.7531344  | 91.6720058  | 57.4171327   | 53.60149141  | 19.2797884   | 20.13828913 | 18.99272952  | 0.4         | 0.764125594 | 1.479950794  | 0.564680875 |
| P00920 | Carbonic anhydrase 2 OS=Mus musculus OX10090 GN=C2 Pe1 S=1V-4 [CAH2_MOUSE]                                                              | Ca2     | 331.9354705 | 83.14257371 | 161.1448021  | 446.9994321 | 370.2697907 | 135.7446612  | 192.0739768  | 284.328228   | 127.2477083 | 129.2264754  | 0.4         | 0.764125594 | 1.480035639  | 0.56589268  |
| Q77514 | Phosphoglucomutase-2 OS=Mus musculus OX10090 GN=Pgm2 Pe1 S=1V-1 [PGM2_MOUSE]                                                            | Pgm2    | 151.1016992 | 60.06193785 | 63.65909592  | 197.6866511 | 173.3192005 | 63.65909592  | 95.17432254  | 138.8874836  | 40.83594649 | 65.22952553  | 0.4         | 0.764125594 | 1.484248876  | 0.569732907 |
| P16125 | L-lactate dehydrogenase B chain OS=Mus musculus OX10090 GN=Ldhb Pe1 S=1V-2 [LDHB_MOUSE]                                                 | Ldhb    | 2405.8066   | 910.1673997 | 1045.394568  | 2351.981278 | 2855.160628 | 1561.088767  | 4453.789523  | 2159.410374  | 807.2387708 | 520.9121293  | 0.4         | 0.764125594 | 1.485366682  | 0.570819026 |
| Q8K6V4 | Arctogactor 4 70 kDa heat shock protein ATPase homolog 1 OS=Mus musculus OX10090 GN=Ahsa1 Pe1 S=1V-2 [AHS1_MOUSE]                       | Ahsa1   | 176.5186203 | 61.77110021 | 61.63023995  | 168.4226673 | 189.9473553 | 88.7230391   | 99.9732014   | 149.0310255  | 66.2902186  | 53.32557198  | 0.4         | 0.764125594 | 1.490970794  | 0.575997965 |
| Q9R172 | SUMO-activating enzyme subunit 1 OS=Mus musculus OX10090 GN=Saep1 Pe1 S=1V-1 [SAE1_MOUSE]                                               | Sae1    | 186.3553126 | 53.17996103 | 58.49561117  | 167.289039  | 108.4056221 | 90.98156842  | 99.34362828  | 149.2254099  | 51.40018663 | 61.63899614  | 0.4         | 0.764125594 | 1.502113354  | 0.586993827 |
| Q9CY9N | Renin receptor OS=Mus musculus OX10090 GN=Atp6ap2 Pe1 S=1V-2 [RNR_MOUSE]                                                                | Atp6ap2 | 61.96777987 | 51.36970162 | 66.3384255   | 55.02584495 | 124.9168848 | 90.90456399  | 59.8196899   | 90.24204712  | 7.697234355 | 34.94967308  | 0.4         | 0.764125594 | 1.502741324  | 0.589207207 |
| Q60973 | Histone-binding protein RBBP7 OS=Mus musculus OX10090 GN=Rbbp7 Pe1 S=1V-1 [RBBP7_MOUSE]                                                 | Rbbp7   | 477.4012004 | 174.1304696 | 162.7102406  | 459.8500792 | 499.1367075 | 277.5115513  | 271.4109702  | 411.1664763  | 178.4842795 | 117.1618489  | 0.4         | 0.764125594 | 1.519429208  | 0.599243608 |
| P24932 | Transcriptome protein 1 subunit theta OS=Mus musculus OX10090 GN=Cttr Pe1 S=1V-3 [TCTP_MOUSE]                                           | Cttr    | 42.2924251  | 134.0855139 | 132.5376207  | 61.8442241  | 379.0725077 | 206.5237884  | 229.65149129 | 349.1166081  | 166.8479367 | 130.2634533  | 0.4         | 0.764125594 | 1.520489835  | 0.604487365 |
| Q7YH88 | Cytoskeletal FMR1-interacting protein 1 OS=Mus musculus OX10090 GN=Cifp1 Pe1 S=1V-1 [CIFP1_MOUSE]                                       | Cifp1   | 46.9267951  | 10.98989245 | 11.30088455  | 21.6584220  | 21.51769896 | 21.23505475  | 27.92795765  | 35.1370401   | 20.48116549 | 23.71328333  | 0.4         | 0.764125594 | 1.529165647  | 0.61748374  |
| Q9JF1F | Ras GTPase-activating-like protein IQGAP1 OS=Mus musculus OX10090 GN=Iqgap1 Pe1 S=1V-2 [IQGAP1_MOUSE]                                   | Iqgap1  | 140.9539649 | 31.41809839 | 115.2118031  | 147.8587159 | 133.798518  | 66.8190371   | 75.83164974  | 116.1508238  | 57.62920928 | 43.30302953  | 0.4         | 0.764125594 | 1.53169322   | 0.615127372 |
| Q93WC3 | Calcyclin-binding protein OS=Mus musculus OX10090 GN=Cacybp Pe1 S=1V-1 [CYBP_MOUSE]                                                     | Cacybp  | 107.7884659 | 39.98337274 | 44.60479578  | 86.00247767 | 133.9247817 | 67.27320426  | 62.45887815  | 95.73302     | 53.00208168 | 34.37490358  | 0.4         | 0.764125594 | 1.532736784  | 0.616199965 |
| P35278 | Ras-related protein Rab-5C OS=Mus musculus OX10090 GN=Rab5c Pe1 S=1V-2 [RAB5C_MOUSE]                                                    | Rab5c   | 91.59301632 | 35.45898366 | 25.29385114  | 55.894939   | 99.34883499 | 79.17706984  | 50.78160044  | 78.13846627  | 35.7079574  | 21.74827817  | 0.4         | 0.764125594 | 1.533708233  | 0.621719687 |
| Q9CZU6 | Citrate synthase, mitochondrial OS=Mus musculus OX10090 GN=Cs Pe1 S=1V-1 [CS_MOUSE]                                                     | Cs      | 301.363268  | 73.81858815 | 85.45457873  | 371.8324039 | 271.7457491 | 114.0620687  | 151.2030646  | 234.5467406  | 330.0396204 | 106.8569701  | 0.4         | 0.764125594 | 1.551203677  | 0.633380727 |
| Q92020 | Heterogeneous nuclear ribonucleoprotein A/B OS=Mus musculus OX10090 GN=Hnrapb Pe1 S=1V-1 [ROAA_MOUSE]                                   | Hnrapb  | 146.470385  | 50.1692062  | 496.634773   | 150.448065  | 1461.931162 | 866.3406883  | 81.8002248   | 127.588515   | 558.8209695 | 356.783252   | 0.4         | 0.764125594 | 1.554618229  | 0.636630338 |
| Q99051 | 3'(2',5'-bisphosphate nucleotidase 1 OS=Mus musculus OX10090 GN=Bpnt1 Pe1 S=1V-2 [BPN1_MOUSE]                                           | Bpnt1   | 224.672647  | 123.1555724 | 0.228.39805  | 224.786599  | 87.91483726 | 11.0000000   | 104.8034240  | 180.3460394  | 112.4953638 | 80.04377221  | 0.4         | 0.764125594 | 1.556927106  | 0.63749687  |
| Q9QZ88 | Vacuolar protein sorting-associated protein 29 OS=Mus musculus OX10090 GN=Vps29 Pe1 S=1V-1 [VPS29_MOUSE]                                | Vps29   | 147.207652  | 43.20533604 | 56.2358602   | 200.8989718 | 93.48466772 | 90.79712667  | 82.01219136  | 128.3933887  | 56.80131425 | 62.80553436  | 0.4         | 0.764125594 | 1.565540276  | 0.646660625 |
| Q50563 | Fractionate-bisphosphate aldolase C OS=Mus musculus OX10090 GN=Aldoc Pe1 S=1V-1 [ALDOC_MOUSE]                                           | Aldoc   | 2296.064294 | 775.2497347 | 777.9022860  | 2581.94864  | 2153.051381 | 1301.08382   | 1283.071971  | 2011.776689  | 877.2740868 | 651.6440558  | 0.4         | 0.764125594 | 1.567937524  | 0.648888075 |
| P02798 | Metallothionein 2 OS=Mus musculus OX10090 GN=Mt2 Pe1 S=1V-2 [MT2_MOUSE]                                                                 | Mt2     | 12.09627208 | 4.466197511 | 0.123.552401 | 8.075597294 | 6.47274602  | 5.230823196  | 6.65399727   | 6.116770959  | 4.333618712 | 0.4          | 0.764125594 | 1.56849748  | 0.649385961  |             |
| Q8VF60 | Ribulose-phosphate 3-epimerase OS=Mus musculus OX10090 GN=Rpe Pe1 S=1V-1 [RPE_MOUSE]                                                    | Rpe     | 56.52251648 | 16.98527069 | 16.16575719  | 56.63053453 | 51.1867900  | 32.9338461   | 29.89120245  | 46.91707265  | 23.06707298 | 12.41191864  | 0.4         | 0.764125594 | 1.56959496   | 0.650932066 |
| PA9722 | Proteasome subunit alpha type-2 OS=Mus musculus OX10090 GN=Psm2 Pe1 S=1V-3 [PSA2_MOUSE]                                                 | Psm2    | 138.8089297 | 164.2726145 | 87.42098322  | 369.6162155 | 366.051497  | 160.0322176  | 190.1525091  | 298.5818134  | 117.8523252 | 120.010471   | 0.4         | 0.764125594 | 1.570222843  | 0.650993916 |
| FS4726 | UV excision repair protein RAD23 homolog A OS=Mus musculus OX10090 GN=Rad23a Pe1 S=1V-2 [RD23A_MOUSE]                                   | Rad23a  | 173.899622  | 22.60264171 | 78.54314902  | 181.6202173 | 159.7946886 | 90.36692268  | 91.61537159  | 143.92772767 | 76.39196313 | 47.65104435  | 0.4         | 0.764125594 | 1.570989884  | 0.651682129 |
| P62082 | 40S ribosomal protein S7 OS=Mus musculus OX10090 GN=Rps7 Pe1 S=1V-1 [RPS7_MOUSE]                                                        | Rps7    | 166.9670676 | 19.56905399 | 19.52536211  | 212.7110035 | 102.6803346 | 57.07445359  | 115.628574   | 81.2906172   | 82.96258961 | 97.38477415  | 0.4         | 0.764125594 | 1.572845072  | 0.653376577 |
| Q9D8Z5 | Eukaryotic translation initiation factor 3 subunit K OS=Mus musculus OX10090 GN=Eif3k Pe1 S=1V-1 [EIF3K_MOUSE]                          | Eif3k   | 0.581147621 | 67.62780101 | 59.65928367  | 62.50072951 | 75.49329439 | 44.81795907  | 65.8710362   | 56.8625549   | 8.422598261 | 0.4          | 0.764125594 | 1.572910329 | 0.653464626  |             |
| Q70435 | Proteasome subunit alpha type-3 OS=Mus musculus OX10090 GN=Psm3 Pe1 S=1V-3 [PSA3_MOUSE]                                                 | Psm3    | 457.852082  | 107.9465372 | 72.56834494  | 58.7866662  | 47.0519979  | 273.5521321  | 272.6576948  | 429.1195987  | 128.8998758 | 138.4466486  | 0.4         | 0.764125594 | 1.573804052  | 0.654288022 |
| Q08576 | RUN domain-containing protein 3A OS=Mus musculus OX10090 GN=Runc3a Pe1 S=1V-1 [RUN3A_MOUSE]                                             | Runc3a  | 687.2785595 | 184.9832329 | 224.3014851  | 448.220268  | 692.4668032 | 392.4208398  | 365.5102925  | 577.8339759  | 279.3427678 | 1162.719734  | 0.4         | 0.764125594 | 1.580049891  | 0.660384804 |
| Q9R011 | Multifunctional procollagen lysine hydroxylase and glyoxylase transaminase 1B OS=Mus musculus OX10090 GN=Plod3 Pe1 S=1V-1 [PLOD3_MOUSE] | Plod3   | 80.53625101 | 155.2071957 | 150.8134579  | 137.4063152 | 206.5312705 | 267.8484883  | 128.8084716  | 203.9226827  | 41.82715614 | 65.23965201  | 0.4         | 0.764125594 | 1.582639564  | 0.661985954 |
| Q93WC3 | Glycican-1 OS=Mus musculus OX10090 GN=Gpc1 Pe1 S=1V-1 [GPC1_MOUSE]                                                                      | Gpc1    | 99.13568427 | 48.3900072  | 46.11892085  | 97.96574827 | 95.93528825 | 34.2100000   | 64.5842332   | 102.53152    | 29.97512946 | 92.11973078  | 0.4         | 0.764125594 | 1.588448122  | 0.667617373 |
| Q8P8B0 | MOB kinase activator 1B OS=Mus musculus OX10090 GN=Mob1b Pe1 S=1V-3 [MOB1B_MOUSE]                                                       | Mob1b   | 69.9341842  | 33.41533623 | 34.32606761  | 68.3351341  | 91.41963927 | 60.3363980   | 45.89185289  | 73.36373118  | 20.82623212 | 16.14023499  | 0.4         | 0.764125594 | 1.598622121  | 0.676828951 |
| Q9DCL9 | Multifunctional protein ADE2 OS=Mus musculus OX10090 GN=Paics Pe1 S=1V-4 [PURE_MOUSE]                                                   | Paics   | 327.9317695 | 78.37922688 | 104.1971591  | 311.6727082 | 371.0478    |              |              |              |             |              |             |             |              |             |

|        |                                                                                                                  |         |              |             |              |             |              |              |             |              |             |             |             |             |             |              |
|--------|------------------------------------------------------------------------------------------------------------------|---------|--------------|-------------|--------------|-------------|--------------|--------------|-------------|--------------|-------------|-------------|-------------|-------------|-------------|--------------|
| QR8014 | Heterogeneous nuclear ribonucleoprotein L OS=Mus musculus OX=10090 GN=HnrnpL PE=1 SV=2 - [HNRPL_MOUSE]           | HnrnpL  | 355.5935113  | 64.33027084 | 58.52968115  | 350.7785699 | 62.0155202   | 162.0088815  | 159.4844878 | 305.0675905  | 169.8601588 | 126.5540761 | 0.4         | 0.764125594 | 1.912835504 | 0.935712813  |
| QR8017 | Vacuolar protein sorting-associated protein 37B OS=Mus musculus OX=10090 GN=Vps37b PE=1 SV=1 - [VP37B_MOUSE]     | Vps37b  | 15.32284436  | 0           | 0.276575923  | 11.9750745  | 30.5677467   | 30.34928539  | 12.6962012  | 24.2973668   | 11.60794508 | 10.67198071 | 0.4         | 0.764125594 | 1.913750929 | 0.936403878  |
| QSCYR6 | Phosphocreatylglucosamine mutase OS=Mus musculus OX=10090 GN=Pgm3 PE=1 SV=1 - [PGM3_MOUSE]                       | Pgm3    | 21.12937993  | 20.76789823 | 22.14489512  | 116.7888264 | 136.1106743  | 60.36391873  | 54.9478621  | 105.3210731  | 58.01300544 | 37.84951396 | 0.4         | 0.764125594 | 1.916745604 | 0.938658071  |
| QBKBC5 | Importin-5 OS=Mus musculus OX=10090 GN=Ipo5 PE=1 SV=3 - [IPO5_MOUSE]                                             | Ipo5    | 208.7272624  | 48.64782112 | 32.68148464  | 197.8276224 | 25.5588493   | 103.4744746  | 96.6856465  | 185.6032967  | 97.35905305 | 76.7868927  | 0.4         | 0.764125594 | 1.919936484 | 0.941058584  |
| PI1532 | Glutathione peroxidase 1 OS=Mus musculus OX=10090 GN=Gpx1 PE=1 SV=2 - [Gpx1_MOUSE]                               | Gpx1    | 110.3000200  | 18.97996916 | 22.38672471  | 110.0492927 | 116.9446506  | 65.12443593  | 50.55557155 | 97.07795757  | 51.76824225 | 27.83360228 | 0.4         | 0.764125594 | 1.920222693 | 0.941275634  |
| Q9W777 | GTP-AMF phosphotransferase MK3, mitochondrial OS=Mus musculus OX=10090 GN=Kaf3 PE=1 SV=3 - [KAD3_MOUSE]          | Kaf3    | 71.29134007  | 23.60051323 | 0            | 0.774793568 | 58.97275096  | 50.43148715  | 31.77582243 | 63.35119126  | 36.55062404 | 14.45496722 | 0.4         | 0.764125594 | 1.930750696 | 0.945161891  |
| Q60519 | Semaphorin-5B OS=Mus musculus OX=10090 GN=Sem5b PE=1 SV=2 - [SEM5B_MOUSE]                                        | Sema5b  | 0            | 26.25112783 | 10.1957528   | 23.8667008  | 18.80057517  | 32.94007221  | 12.90695221 | 24.9521939   | 14.45456386 | 7.504077069 | 0.4         | 0.764125594 | 1.933292908 | 0.951102577  |
| Q6P5F9 | Exportin-1 OS=Mus musculus OX=10090 GN=Xpo1 PE=1 SV=1 - [XPO1_MOUSE]                                             | Xpo1    | 26.47242002  | 0.846271161 | 48.47462558  | 261.2489045 | 317.012753   | 109.7662375  | 118.1371791 | 229.3441137  | 131.1992453 | 107.2458939 | 0.4         | 0.764125594 | 1.941337464 | 0.957050924  |
| QR8242 | Di-N-acetylchitinase OS=Mus musculus OX=10090 GN=Ctbs PE=1 SV=2 - [DIAC_MOUSE]                                   | Ctbs    | 0            | 16.49622491 | 67.57131654  | 35.56167507 | 55.8279754   | 74.19099002  | 28.02251382 | 55.1179388   | 35.22942426 | 19.31892368 | 0.4         | 0.764125594 | 1.966697001 | 0.957747706  |
| QD9D02 | Threonine-tRNA ligase 1, cytoplasmic OS=Mus musculus OX=10090 GN=Tars1 PE=1 SV=2 - [SYTC_MOUSE]                  | Tars1   | 133.8822861  | 10.25945371 | 26.95241294  | 152.3286633 | 128.9647632  | 56.03378781  | 57.01338426 | 112.4424041  | 67.07614747 | 50.22864467 | 0.4         | 0.764125594 | 1.975388197 | 0.979358172  |
| PS0580 | Proliferation-associated protein 26A OS=Mus musculus OX=10090 GN=Pa26a PE=1 SV=3 - [PA26A_MOUSE]                 | Pa26a   | 360.5608131  | 68.9116889  | 41.73897405  | 312.8728578 | 470.5469652  | 153.9588018  | 157.0740908 | 321.45959416 | 176.7507358 | 158.2944864 | 0.4         | 0.764125594 | 1.989294997 | 0.992257233  |
| Q91WQ3 | Tyrosine-tRNA ligase, cytoplasmic OS=Mus musculus OX=10090 GN=Yars1 PE=1 SV=3 - [SYCY_MOUSE]                     | Yars1   | 84.48460864  | 0           | 13.11942902  | 86.6505221  | 79.7741937   | 28.10048696  | 32.53467922 | 64.84181954  | 45.66595989 | 32.00413162 | 0.4         | 0.764125594 | 1.993092626 | 0.994462266  |
| P28474 | Alcohol dehydrogenase class-3 OS=Mus musculus OX=10090 GN=AdH5 PE=1 SV=3 - [ADH3_MOUSE]                          | AdH5    | 257.6071398  | 48.49312842 | 46.33392211  | 401.449817  | 177.0690780  | 126.9897791  | 117.4796350 | 235.1695347  | 121.360142  | 146.1637148 | 0.4         | 0.764125594 | 2.001816575 | 1.001309787  |
| Q8C0R4 | 40S ribosomal protein S21 OS=Mus musculus OX=10090 GN=Rps21 PE=1 SV=1 - [RPS1_MOUSE]                             | Rps21   | 193.5481557  | 0           | 64.516059    | 146.633001  | 193.5640951  | 177.3041023  | 86.02140697 | 172.701725   | 98.54990221 | 23.80356893 | 0.4         | 0.764125594 | 2.00765762  | 1.005511915  |
| MD227  | Signal transducer and activator of transcription 3 OS=Mus musculus OX=10090 GN=Stat3 PE=1 SV=2 - [STAT3_MOUSE]   | Stat3   | 114.6889369  | 0           | 45.01324245  | 113.732674  | 139.7151031  | 107.12353515 | 53.23405959 | 107.8570199  | 57.78472497 | 35.16585666 | 0.4         | 0.764125594 | 2.026091797 | 1.018699541  |
| Q6A026 | Sister chromatid cohesion protein PDSS homolog A OS=Mus musculus OX=10090 GN=Pds5a PE=1 SV=3 - [PDSSA_MOUSE]     | Pds5a   | 28.59151038  | 0           | 0.846611697  | 30.34091831 | 27.5084633   | 36.10782113  | 12.21207729 | 24.85072862  | 14.74400116 | 7.197022201 | 0.4         | 0.764125594 | 2.034825533 | 1.024905102  |
| Q92607 | Lupus La protein homolog OS=Mus musculus OX=10090 GN=Ssb PE=1 SV=1 - [LA_MOUSE]                                  | Ssb     | 61.63340984  | 16.10013955 | 0            | 53.24755627 | 96.56195668  | 36.0461274   | 25.9118313  | 52.97761326  | 31.96657214 | 16.76061106 | 0.4         | 0.764125594 | 2.044584881 | 1.031807957  |
| PE2830 | 60S ribosomal protein L23 OS=Mus musculus OX=10090 GN=Rpl23 PE=1 SV=1 - [RL23_MOUSE]                             | Rpl23   | 429.5561428  | 23.29766902 | 20.20691513  | 362.5601271 | 582.8954548  | 47.0209524   | 161.0202427 | 330.8255114  | 232.5845698 | 269.3406318 | 0.4         | 0.764125594 | 2.05455852  | 1.038824832  |
| PE1205 | ADP-ribosylation factor 3 OS=Mus musculus OX=10090 GN=Arf3 PE=1 SV=2 - [ARF3_MOUSE]                              | Arf3    | 715.9005637  | 0           | 21.841022    | 578.6364091 | 896.2435755  | 447.6104983  | 399.9138682 | 640.830041   | 367.4927277 | 230.6923903 | 0.4         | 0.764125594 | 2.067087496 | 1.048074465  |
| QB2Q09 | Eukaryotic translation initiation factor 3 subunit B OS=Mus musculus OX=10090 GN=EIF3b PE=1 SV=1 - [EIF3B_MOUSE] | EIF3b   | 39.01095664  | 30.71133546 | 13.65467192  | 67.84071422 | 87.35986519  | 20.94048453  | 27.79232134 | 33.8136961   | 12.9277135  | 34.13778331 | 0.4         | 0.764125594 | 2.112586976 | 1.079010737  |
| QB3J77 | Couator subunit beta OS=Mus musculus OX=10090 GN=Copb1 PE=1 SV=1 - [COPB_MOUSE]                                  | Copb1   | 11.715790933 | 0           | 13.66613145  | 55.2472916  | 86.16665544  | 36.00275039  | 27.68001359 | 59.13873248  | 38.16372526 | 25.30703842 | 0.4         | 0.764125594 | 2.142085749 | 1.099016233  |
| QB3R14 | T-complex protein 1 subunit beta OS=Mus musculus OX=10090 GN=Ctcf PE=1 SV=4 - [TCPB_MOUSE]                       | Ctcf    | 276.7910064  | 33.34863024 | 37.62558455  | 324.3993054 | 269.7515524  | 152.781644   | 115.922074  | 248.9834166  | 139.3330014 | 67.67470265 | 0.4         | 0.764125594 | 2.147851638 | 1.102894834  |
| QB8K67 | Protein RCC2 OS=Mus musculus OX=10090 GN=Rcc2 PE=1 SV=1 - [RCC2_MOUSE]                                           | Rcc2    | 310.6379375  | 0           | 55.80279046  | 34.7141889  | 304.1990664  | 143.871487   | 121.9069093 | 263.262008   | 165.7505004 | 105.0830375 | 0.4         | 0.764125594 | 2.159533223 | 1.110795122  |
| BR20C6 | CAD protein OS=Mus musculus OX=10090 GN=Cad PE=1 SV=1 - [FYR1_MOUSE]                                             | Cad     | 41.84237843  | 0           | 10.62346304  | 37.99125795 | 52.33990824  | 24.15002699  | 17.48876683 | 38.16062034  | 21.74982893 | 14.0956773  | 0.4         | 0.764125594 | 2.165665059 | 1.125665059  |
| QD9D01 | Heterogeneous nuclear ribonucleoprotein M OS=Mus musculus OX=10090 GN=Hnrmp1 PE=1 SV=3 - [HNRMP_MOUSE]           | Hnrmp1  | 74.23224407  | 0           | 14.47935308  | 78.55989535 | 68.9889264   | 49.18286266  | 29.57052905 | 65.57715022  | 39.34888993 | 14.98270599 | 0.4         | 0.764125594 | 2.217652248 | 1.149033153  |
| QR8CU3 | Epsin-2 OS=Mus musculus OX=10090 GN=Ep2 PE=1 SV=1 - [EPN2_MOUSE]                                                 | Ep2     | 192.5638301  | 0           | 59.16617071  | 179.6889315 | 178.4040933  | 212.0789818  | 83.91000026 | 190.626709   | 83.67732092 | 19.07659044 | 0.4         | 0.764125594 | 2.265777066 | 1.179560544  |
| QR9087 | Glypican-6 OS=Mus musculus OX=10090 GN=Gpc6 PE=1 SV=1 - [GPC6_MOUSE]                                             | Gpc6    | 34.12579428  | 7.341077878 | 0            | 25.08147123 | 29.256111    | 40.56620203  | 13.82229072 | 31.63494957  | 17.9623787  | 80.11685883 | 0.4         | 0.764125594 | 2.286651228 | 1.194506386  |
| QB8D11 | Inter-alpha-trypsin inhibitor heavy chain H5 OS=Mus musculus OX=10090 GN=Ih5 PE=1 SV=1 - [ITH5_MOUSE]            | Ih5     | 81.18233151  | 77.46394379 | 83.16934379  | 441.8752108 | 86.66940388  | 73.83502273  | 77.8505621  | 200.7930925  | 5.873536872 | 208.8818299 | 0.4         | 0.764125594 | 2.359137829 | 1.1373719636 |
| QB89Y5 | Enoyl-CoA hydratase, mitochondrial OS=Mus musculus OX=10090 GN=Ech1 PE=1 SV=1 - [ECHM_MOUSE]                     | Ech1    | 68.40089682  | 0           | 16.70483049  | 37.16747107 | 64.89537056  | 158.20261019 | 28.36857577 | 86.69629353  | 35.66094344 | 63.31006559 | 0.4         | 0.764125594 | 2.306607891 | 1.611676593  |
| Q3U0U1 | Protein transport protein Sec31A OS=Mus musculus OX=10090 GN=Sec31a PE=1 SV=2 - [SC31A_MOUSE]                    | Sec31a  | 64.67270621  | 10.14341555 | 12.07946444  | 254.9326782 | 58.50547123  | 17.93288395  | 28.9651954  | 110.4570111  | 30.93879315 | 126.7534911 | 0.4         | 0.764125594 | 2.381349185 | 1.931092692  |
| Q62523 | Zywn OS=Mus musculus OX=10090 GN=Zyw PE=1 SV=2 - [ZYX_MOUSE]                                                     | Zyw     | 85.32351543  | 31.85269263 | 27.20148738  | 636.5026899 | 60.2940233   | 44.00453084  | 48.12577714 | 246.3674143  | 32.29770762 | 337.4469715 | 0.4         | 0.764125594 | 2.359448958 | 1.513707559  |
| PE1164 | Alpha-actinin OS=Mus musculus OX=10090 GN=Actr1a PE=1 SV=1 - [ACT2_MOUSE]                                        | Actr1a  | 79.69496791  | 0           | 57.35250868  | 788.5960655 | 609.2550817  | 21.58641308  | 45.68249219 | 50.1458548   | 41.10917101 | 419.4282715 | 0.4         | 0.764125594 | 2.641265141 | 1.01397551   |
| AZALU4 | Protein Shroom2 OS=Mus musculus OX=10090 GN=Shroom2 PE=1 SV=1 - [SHRM2_MOUSE]                                    | Shroom2 | 0            | 0           | 0            | 0           | 47.24199815  | 0            | 15.74732722 | 0            | 27.2518035  | 0.504985075 | 0.764125594 | only in a1H | only in a1H | only in a1H  |
| AQ9Z51 | Cilia- and flagella-associated protein 221 OS=Mus musculus OX=10090 GN=Cfap221 PE=1 SV=1 - [PCDP1_MOUSE]         | Cfap221 | 0            | 0           | 0            | 0           | 17.27167741  | 0            | 0           | 5.757225803  | 0           | 9.971807601 | 0.504985075 | 0.764125594 | only in a1H | only in a1H  |
| BF0284 | Neuroigin 4-like OS=Mus musculus OX=10090 GN=Ngn4 PE=1 SV=1 - [NLGN4_MOUSE]                                      | Ngn4    | 0            | 0           | 0            | 0           | 43.488489802 | 0            | 0           | 14.49616001  | 0           | 25.10809604 | 0.504985075 | 0.764125594 | only in a1H | only in a1H  |
| BR2K1  | Queuine tRNA-ribosyltransferase accessory subunit 2 OS=Mus musculus OX=10090 GN=Qtrt2 PE=1 SV=2 - [QTRT2_MOUSE]  | Qtrt2   | 0            | 0           | 0            | 0           | 5.358638144  | 0            | 0           | 1.786212715  | 0           | 3.093811175 | 0.504985075 | 0.764125594 | only in a1H | only in a1H  |
| E9Q477 | Ankyrin repeat domain-containing protein 11 OS=Mus musculus OX=10090 GN=Ankd11 PE=1 SV=1 - [ANKR11_MOUSE]        | Ankd11  | 0            | 0           | 0            | 0           | 11.260267671 | 0            | 0           | 3.753422538  | 0           | 6.501118538 | 0.504985075 | 0.764125594 | only in a1H | only in a1H  |
| EQ8Q12 | Receptor-type tyrosine-protein phosphatase O OS=Mus musculus OX=10090 GN=Ptpro PE=1 SV=1 - [PTPRO_MOUSE]         | Ptpro   | 0            | 0           | 212.11819899 | 0           | 0            | 0            | 0           | 70.72732998  | 0           | 122.503329  | 0.504985075 | 0.764125594 | only in a1H | only in a1H  |
| EQ8C77 | Dynamin heavy chain 1, axonemal OS=Mus musculus OX=10090 GN=Dnah1 PE=1 SV=1 - [DPNH1_MOUSE]                      | Dnah1   | 0            | 0           | 0            | 288.8343233 | 0            | 0            | 0           | 96.27810796  | 0           | 166.7585746 | 0.504985075 | 0.764125594 | only in a1H | only in a1H  |
| QO8784 | Tracle protein OS=Mus musculus OX=10090 GN=Tcfl1 PE=1 SV=1 - [TCF1_MOUSE]                                        | Tcfl1   | 0            | 0           | 0            | 5.335966889 | 0            | 0            | 0           | 1.778565221  | 0           | 3.080721308 | 0.504985075 | 0.764125594 | only in a1H | only in a1H  |
| QO9118 | Netrin-1 OS=Mus musculus OX=10090 GN=Netn1 PE=1 SV=3 - [NET1_MOUSE]                                              | Netn1   | 0            | 0           | 0            | 0           | 22.23799207  | 0            | 0           | 7.442266023  | 0           | 12.89107223 | 0.504985075 | 0.764125594 | only in a1H | only in a1H  |
| Q53207 | Cyclin-dependent kinase 2-associated protein 1 OS=Mus musculus OX=10090 GN=Cdk2ap1 PE=1 SV=2 - [CKA1_MOUSE]      | Cdk2ap1 | 0            | 0           | 0            | 0           | 7.626888105  | 0            | 0           | 2.542296035  | 0           | 4.403385901 | 0.504985075 | 0.764125594 | only in a1H | only in a1H  |
| Q53423 | Serine-pyruvate aminotransferase, mitochondrial OS=Mus musculus OX=10090 GN=Agpt PE=1 SV=3 - [SPYA_MOUSE]        | Agpt    | 0            | 0           | 0            | 0           | 15.58845909  | 0            | 0           | 5.196153029  | 0           | 9.00000105  | 0.504985075 | 0.764125594 | only in a1H | only in a1H  |
| Q54751 | Cone-rod homeobox protein OS=Mus musculus OX=10090 GN=Crx PE=1 SV=1 - [CRX_MOUSE]                                | Crx     | 0            | 0           | 0            | 0           | 48.68670942  | 0            | 0           | 16.22808749  | 0           | 28.10928479 | 0.504985075 | 0.764125594 | only in a1H | only in a1H  |
| Q54834 | Rho GTPase-activating protein 6 OS=Mus musculus OX=10090 GN=Arhgap6 PE=1 SV=3 - [RHG06_MOUSE]                    | Arhgap6 | 0            | 0           | 0            | 0           | 16.38331507  | 0            | 0           | 5.461105024  | 0           | 9.458911366 | 0.504985075 | 0.764125594 | only in a1H | only in a1H  |
| Q      |                                                                                                                  |         |              |             |              |             |              |              |             |              |             |             |             |             |             |              |

|        |                                                                        |                                                      |                                              |                |        |   |   |              |   |   |             |   |             |             |             |             |             |
|--------|------------------------------------------------------------------------|------------------------------------------------------|----------------------------------------------|----------------|--------|---|---|--------------|---|---|-------------|---|-------------|-------------|-------------|-------------|-------------|
| P70279 | Surfeit locus protein 6                                                | OS=Mus musculus OX=10090 GN=Surf6 PE=1 SV=1          | -[SURF6_MOUSE]                               | Surf6          | 0      | 0 | 0 | 47.59831275  | 0 | 0 | 15.86610425 | 0 | 27.48089868 | 0.504985075 | 0.764125594 | only in a1H | only in a1H |
| P70336 | Rho-associated protein kinase 2                                        | OS=Mus musculus OX=10090 GN=Rock2 PE=1 SV=1          | -[ROCK2_MOUSE]                               | Rock2          | 0      | 0 | 0 | 18.9259444   | 0 | 0 | 6.30846184  | 0 | 10.9268991  | 0.504985075 | 0.764125594 | only in a1H | only in a1H |
| P70460 | Vasodilator-stimulated phosphoprotein                                  | OS=Mus musculus OX=10090 GN=Vasp PE=1 SV=4           | -[VASP_MOUSE]                                | Vasp           | 0      | 0 | 0 | 28.49538296  | 0 | 0 | 9.49846037  | 0 | 16.45181702 | 0.504985075 | 0.764125594 | only in a1H | only in a1H |
| P70598 | CTP synthase 1                                                         | OS=Mus musculus OX=10090 GN=Ctsp1 PE=1 SV=2          | -[PPR1_MOUSE]                                | Ctsp1          | 0      | 0 | 0 | 11.49772623  | 0 | 0 | 3.832575409 | 0 | 6.638215332 | 0.504985075 | 0.764125594 | only in a1H | only in a1H |
| P82198 | Transforming growth factor-beta-induced protein ligand 3               | OS=Mus musculus OX=10090 GN=Tgfb3 PE=1 SV=1          | -[BGH3_MOUSE]                                | Tgfb3          | 0      | 0 | 0 | 3.386717841  | 0 | 0 | 1.128905947 | 0 | 1.955322457 | 0.504985075 | 0.764125594 | only in a1H | only in a1H |
| P83877 | Thioredoxin-like protein 4A                                            | OS=Mus musculus OX=10090 GN=Txn4a PE=1 SV=1          | -[TXNA_MOUSE]                                | Txn4a          | 0      | 0 | 0 | 14.37807821  | 0 | 0 | 4.792592737 | 0 | 8.301873246 | 0.504985075 | 0.764125594 | only in a1H | only in a1H |
| P84102 | Small EDRK-rich factor 2                                               | OS=Mus musculus OX=10090 GN=Serf2 PE=1 SV=1          | -[SERF2_MOUSE]                               | Serf2          | 0      | 0 | 0 | 39.33604821  | 0 | 0 | 13.11201607 | 0 | 22.71067802 | 0.504985075 | 0.764125594 | only in a1H | only in a1H |
| P85094 | Isoschirismatase domain-containing protein 2A                          | OS=Mus musculus OX=10090 GN=Isc2a PE=1 SV=1          | -[ISCA2_MOUSE]                               | Isc2a          | 0      | 0 | 0 | 6.031065911  | 0 | 0 | 2.01035304  | 0 | 3.482037527 | 0.504985075 | 0.764125594 | only in a1H | only in a1H |
| P97377 | Cyclin-dependent kinase 2                                              | OS=Mus musculus OX=10090 GN=Cdk2 PE=1 SV=2           | -[CDK2_MOUSE]                                | Cdk2           | 0      | 0 | 0 | 76.88528573  | 0 | 0 | 25.62842858 | 0 | 44.38974041 | 0.504985075 | 0.764125594 | only in a1H | only in a1H |
| P97785 | GDNF family receptor alpha-1                                           | OS=Mus musculus OX=10090 GN=Gfra1 PE=1 SV=2          | -[GFRA1_MOUSE]                               | Gfra1          | 0      | 0 | 0 | 10.11924823  | 0 | 0 | 10.11924823 | 0 | 17.52705208 | 0.504985075 | 0.764125594 | only in a1H | only in a1H |
| P98064 | Mannan-binding lectin serine protease 1                                | OS=Mus musculus OX=10090 GN=Masp1 PE=1 SV=2          | -[MASP1_MOUSE]                               | Masp1          | 0      | 0 | 0 | 75.96653211  | 0 | 0 | 25.32217727 | 0 | 43.85929776 | 0.504985075 | 0.764125594 | only in a1H | only in a1H |
| P98156 | Very low-density lipoprotein receptor                                  | OS=Mus musculus OX=10090 GN=Vldlr PE=1 SV=1          | -[VLDLR_MOUSE]                               | Vldlr          | 0      | 0 | 0 | 10.81007949  | 0 | 0 | 3.603398288 | 0 | 6.241202301 | 0.504985075 | 0.764125594 | only in a1H | only in a1H |
| Q00731 | Vascular endothelial growth factor A                                   | OS=Mus musculus OX=10090 GN=Vegef PE=1 SV=2          | -[VEGFA_MOUSE]                               | Vegef          | 0      | 0 | 0 | 58.22379392  | 0 | 0 | 19.40793131 | 0 | 33.61552309 | 0.504985075 | 0.764125594 | only in a1H | only in a1H |
| Q00919 | Heterogeneous nuclear ribonucleoprotein L-like protein 2               | OS=Mus musculus OX=10090 GN=Hnrlp2 PE=1 SV=2         | -[HNRL2_MOUSE]                               | Hnrlp2         | 0      | 0 | 0 | 10.37308552  | 0 | 0 | 3.457595173 | 0 | 5.988903717 | 0.504985075 | 0.764125594 | only in a1H | only in a1H |
| Q03157 | Amyloid-like protein 1                                                 | OS=Mus musculus OX=10090 GN=Agpl1 PE=1 SV=1          | -[APL1_MOUSE]                                | Agpl1          | 0      | 0 | 0 | 10.68363214  | 0 | 0 | 3.56121705  | 0 | 6.168197894 | 0.504985075 | 0.764125594 | only in a1H | only in a1H |
| Q04859 | Serine/threonine-protein kinase MAK                                    | OS=Mus musculus OX=10090 GN=Mak PE=1 SV=2            | -[MAK_MOUSE]                                 | Mak            | 0      | 0 | 0 | 86.86104629  | 0 | 0 | 28.9536821  | 0 | 50.14924846 | 0.504985075 | 0.764125594 | only in a1H | only in a1H |
| Q05860 | Formin-1                                                               | OS=Mus musculus OX=10090 GN=Fmn1 PE=1 SV=2           | -[FMN1_MOUSE]                                | Fmn1           | 0      | 0 | 0 | 51.42132733  | 0 | 0 | 17.14044244 | 0 | 29.68811718 | 0.504985075 | 0.764125594 | only in a1H | only in a1H |
| Q05C18 | Laral-related protein 7                                                | OS=Mus musculus OX=10090 GN=Larp7 PE=1 SV=2          | -[LARP7_MOUSE]                               | Larp7          | 0      | 0 | 0 | 75.00169252  | 0 | 0 | 25.00056417 | 0 | 43.30224736 | 0.504985075 | 0.764125594 | only in a1H | only in a1H |
| Q08890 | Iduronate 2-sulfatase                                                  | OS=Mus musculus OX=10090 GN=Id5 PE=2 SV=3            | -[IDS_MOUSE]                                 | Id5            | 0      | 0 | 0 | 9.298440679  | 0 | 0 | 3.099480226 | 0 | 5.368457229 | 0.504985075 | 0.764125594 | only in a1H | only in a1H |
| Q0VGB7 | Serine/threonine-protein phosphatase 4                                 | regulatory subunit 2                                 | OS=Mus musculus OX=10090 GN=Ppp4r2 PE=1 SV=1 | -[PP4R2_MOUSE] | Ppp4r2 | 0 | 0 | 63.48722756  | 0 | 0 | 21.16240919 | 0 | 36.65436792 | 0.504985075 | 0.764125594 | only in a1H | only in a1H |
| Q149F3 | Eukaryotic peptide chain release factor GTP-binding subunit            | EF3B                                                 | OS=Mus musculus OX=10090 GN=Gsp2r PE=1 SV=1  | -[ERF3B_MOUSE] | Gsp2r  | 0 | 0 | 16.14040975  | 0 | 0 | 5.388003251 | 0 | 9.332295383 | 0.504985075 | 0.764125594 | only in a1H | only in a1H |
| Q14C51 | Pentatricopeptide repeat domain-containing protein 3                   | mitochondrial                                        | OS=Mus musculus OX=10090 GN=Ptc3r PE=1 SV=1  | -[PTC3R_MOUSE] | Ptc3r  | 0 | 0 | 47.88287702  | 0 | 0 | 15.36059091 | 0 | 27.64519194 | 0.504985075 | 0.764125594 | only in a1H | only in a1H |
| Q2P2L6 | Protocadherin Fat 4                                                    | OS=Mus musculus OX=10090 GN=Fat4 PE=1 SV=2           | -[FATA_MOUSE]                                | Fata4          | 0      | 0 | 0 | 4.2225019762 | 0 | 0 | 1.408339921 | 0 | 2.439216297 | 0.504985075 | 0.764125594 | only in a1H | only in a1H |
| Q3T1C1 | BRIC-cyclin subunit Abraxas 2                                          | OS=Mus musculus OX=10090 GN=Abraxas2 PE=1 SV=1       | -[ABRX2_MOUSE]                               | Abraxas2       | 0      | 0 | 0 | 8.30053093   | 0 | 0 | 2.768343661 | 0 | 4.794914824 | 0.504985075 | 0.764125594 | only in a1H | only in a1H |
| Q3TND0 | Protein dispatched homolog 1                                           | OS=Mus musculus OX=10090 GN=Disp1 PE=1 SV=2          | -[DISP1_MOUSE]                               | Disp1          | 0      | 0 | 0 | 2.38657546   | 0 | 0 | 0.789525153 | 0 | 1.367497688 | 0.504985075 | 0.764125594 | only in a1H | only in a1H |
| Q3TKY6 | Spliceosome-associated protein CWC27                                   | homolog OS=Mus musculus OX=10090 GN=Cwc27 PE=1 SV=1  | -[CWC27_MOUSE]                               | Cwc27          | 0      | 0 | 0 | 1.45452982   | 0 | 0 | 2.159195499 | 0 | 4.36358946  | 0.504985075 | 0.764125594 | only in a1H | only in a1H |
| Q3U4G3 | Xyloside xylosyltransferase 1                                          | OS=Mus musculus OX=10090 GN=Xytl1 PE=1 SV=2          | -[XKLT1_MOUSE]                               | Xytl1          | 0      | 0 | 0 | 34.67546058  | 0 | 0 | 11.55848686 | 0 | 20.0198865  | 0.504985075 | 0.764125594 | only in a1H | only in a1H |
| Q3USQ7 | UMP-CMP kinase 2, mitochondrial                                        | OS=Mus musculus OX=10090 GN=Cmpk2 PE=1 SV=2          | -[CMPK2_MOUSE]                               | Cmpk2          | 0      | 0 | 0 | 95.70256477  | 0 | 0 | 31.90084952 | 0 | 55.25390153 | 0.504985075 | 0.764125594 | only in a1H | only in a1H |
| Q3UHQ2 | 28 kDa heat- and acid-stable phosphoprotein                            | OS=Mus musculus OX=10090 GN=Pdp1 PE=1 SV=1           | -[HAP28_MOUSE]                               | Pdp1           | 0      | 0 | 0 | 2.36333096   | 0 | 0 | 0.787776987 | 0 | 1.364469766 | 0.504985075 | 0.764125594 | only in a1H | only in a1H |
| Q3UHQ4 | NE-adenosine-methyltransferase non-catalytic subunit                   | OS=Mus musculus OX=10090 GN=Mett14 PE=1 SV=1         | -[MET14_MOUSE]                               | Mett14         | 0      | 0 | 0 | 2.58041264   | 0 | 0 | 0.860137547 | 0 | 1.489801933 | 0.504985075 | 0.764125594 | only in a1H | only in a1H |
| Q3UMW8 | Ceroid-lipofuscinosis neuronal protein 5                               | homolog OS=Mus musculus OX=10090 GN=Cns PE=1 SV=1    | -[CLNS_MOUSE]                                | Cns            | 0      | 0 | 0 | 13.12159858  | 0 | 0 | 4.37366102  | 0 | 7.57578471  | 0.504985075 | 0.764125594 | only in a1H | only in a1H |
| Q3UV68 | ADP-ribose glycohydrolase MACROD2                                      | OS=Mus musculus OX=10090 GN=Macro2 PE=1 SV=1         | -[MACD2_MOUSE]                               | Macro2         | 0      | 0 | 0 | 31.78070585  | 0 | 0 | 10.59356862 | 0 | 18.34859908 | 0.504985075 | 0.764125594 | only in a1H | only in a1H |
| Q3VQ09 | Plastin-1                                                              | OS=Mus musculus OX=10090 GN=Pls1 PE=1 SV=1           | -[PLS1_MOUSE]                                | Pls1           | 0      | 0 | 0 | 55.26847492  | 0 | 0 | 18.42287422 | 0 | 31.90926888 | 0.504985075 | 0.764125594 | only in a1H | only in a1H |
| Q497V5 | S1 RNA-binding domain-containing protein 1                             | OS=Mus musculus OX=10090 GN=Srb1 PE=2 SV=3           | -[SRBD1_MOUSE]                               | Srb1           | 0      | 0 | 0 | 58.19568807  | 0 | 0 | 19.98266139 | 0 | 33.9940041  | 0.504985075 | 0.764125594 | only in a1H | only in a1H |
| Q4ZF67 | Putative mitochondrial import inner membrane translocase subunit Timb8 | A-B                                                  | OS=Mus musculus OX=10090 GN=Timb8a PE=1 SV=1 | -[TIM8A_MOUSE] | Timb8a | 0 | 0 | 45.08769338  | 0 | 0 | 15.02923113 | 0 | 26.03139191 | 0.504985075 | 0.764125594 | only in a1H | only in a1H |
| Q5SSW2 | Proteasome activator complex subunit 4                                 | OS=Mus musculus OX=10090 GN=Psm4 PE=1 SV=1           | -[PSME4_MOUSE]                               | Psm4           | 0      | 0 | 0 | 5.327861127  | 0 | 0 | 1.779595178 | 0 | 3.076042108 | 0.504985075 | 0.764125594 | only in a1H | only in a1H |
| Q5SF73 | Follistatin-related protein 4                                          | OS=Mus musculus OX=10090 GN=Fstl4 PE=1 SV=1          | -[FSTL4_MOUSE]                               | Fstl4          | 0      | 0 | 0 | 4.162925154  | 0 | 0 | 1.387641739 | 0 | 2.403465938 | 0.504985075 | 0.764125594 | only in a1H | only in a1H |
| Q5L1F6 | Luc7-like protein 3                                                    | OS=Mus musculus OX=10090 GN=Luc73 PE=1 SV=1          | -[LCT73_MOUSE]                               | Luc73          | 0      | 0 | 0 | 23.7788386   | 0 | 0 | 7.926279534 | 0 | 13.72814887 | 0.504985075 | 0.764125594 | only in a1H | only in a1H |
| Q5M1W9 | Clustered mitochondria protein homolog                                 | OS=Mus musculus OX=10090 GN=Cln PE=1 SV=2            | -[CIN_MOUSE]                                 | Cln            | 0      | 0 | 0 | 13.38471378  | 0 | 0 | 4.46415126  | 0 | 7.227668103 | 0.504985075 | 0.764125594 | only in a1H | only in a1H |
| Q60520 | Paired amphipathic helix protein Sin3a                                 | OS=Mus musculus OX=10090 GN=Sin3a PE=1 SV=3          | -[SIN3_MOUSE]                                | Sin3a          | 0      | 0 | 0 | 17.54794112  | 0 | 0 | 5.849317306 | 0 | 10.13138053 | 0.504985075 | 0.764125594 | only in a1H | only in a1H |
| Q60648 | Ganglioside GM2 activator                                              | OS=Mus musculus OX=10090 GN=Gm2a PE=1 SV=2           | -[SAP3_MOUSE]                                | Gm2a           | 0      | 0 | 0 | 23.08265567  | 0 | 0 | 7.694218557 | 0 | 13.32677747 | 0.504985075 | 0.764125594 | only in a1H | only in a1H |
| Q60710 | Deoxyribose triphosphate triphosphohydrolase SAMHD1                    | OS=Mus musculus OX=10090 GN=Samhd1 PE=1 SV=3         | -[SAMH1_MOUSE]                               | Samhd1         | 0      | 0 | 0 | 10.56609826  | 0 | 0 | 3.522032753 | 0 | 6.100339677 | 0.504985075 | 0.764125594 | only in a1H | only in a1H |
| Q60714 | Long-chain fatty acid transport protein 1                              | OS=Mus musculus OX=10090 GN=Slc27a1 PE=1 SV=1        | -[S27A1_MOUSE]                               | Slc27a1        | 0      | 0 | 0 | 15.00875091  | 0 | 0 | 5.002919669 | 0 | 8.665306376 | 0.504985075 | 0.764125594 | only in a1H | only in a1H |
| Q60899 | ELAV-like protein 2                                                    | OS=Mus musculus OX=10090 GN=Elav2 PE=1 SV=1          | -[ELAV2_MOUSE]                               | Elav2          | 0      | 0 | 0 | 19.77261575  | 0 | 0 | 6.590871916 | 0 | 11.41572502 | 0.504985075 | 0.764125594 | only in a1H | only in a1H |
| Q61074 | Protein phosphatase 1G                                                 | OS=Mus musculus OX=10090 GN=Ppm1g PE=1 SV=3          | -[PPM1G_MOUSE]                               | Ppm1g          | 0      | 0 | 0 | 22.35958349  | 0 | 0 | 7.45314949  | 0 | 12.90931154 | 0.504985075 | 0.764125594 | only in a1H | only in a1H |
| Q61136 | Serine/threonine-protein kinase PRP4                                   | homolog OS=Mus musculus OX=10090 GN=Ppp4r4 PE=1 SV=3 | -[PRP4B_MOUSE]                               | Ppp4r4         | 0      | 0 | 0 | 8.082313006  | 0 | 0 | 2.694404335 | 0 | 4.666482505 | 0.504985075 | 0.764125594 | only in a1H | only in a1H |
| Q61183 | Poly(A) polymerase alpha                                               | OS=Mus musculus OX=10090 GN=Papa1 PE=1 SV=4          | -[PAP1_MOUSE]                                | Papa1          | 0      | 0 | 0 | 21.43847446  | 0 | 0 | 7.146158155 | 0 | 12.377509   | 0.504985075 | 0.764125594 | only in a1H | only in a1H |
| Q61285 | ATP-binding cassette sub-family D member 2                             | OS=Mus musculus OX=10090 GN=Abcc2 PE=1 SV=1          | -[ABCC2_MOUSE]                               | Abcc2          | 0      | 0 | 0 | 29.78086986  | 0 | 0 | 9.726023986 | 0 | 16.84596597 | 0.504985075 | 0.764125594 | only in a1H | only in a1H |
| Q61477 | Neuroblastoma suppressor of tumorigenicity 1                           | OS=Mus musculus OX=10090 GN=Nbl1 PE=1 SV=2           | -[NBL1_MOUSE]                                | Nbl1           | 0      | 0 | 0 | 106.2759375  | 0 | 0 | 35.42531251 | 0 | 61.35844114 | 0.504985075 | 0.764125594 | only in a1H | only in a1H |
| Q61584 | Fragile X mental retardation syndrome-related protein 1                | OS=Mus musculus OX=10090 GN=Fxr1 PE=1 SV=2           | -[FXRL_MOUSE]                                | Fxr1           | 0      | 0 | 0 | 18.45799105  | 0 | 0 | 6.15266384  | 0 | 10.6567261  | 0.504985075 | 0.764125594 | only in a1H | only in a1H |
| Q61790 | Lymphocyte activation gene 3 protein                                   | OS=Mus musculus OX=10090 GN=Lag3 PE=1 SV=1           | -[LAG3_MOUSE]                                | Lag3           | 0      | 0 | 0 | 3.406513161  | 0 | 0 | 1.135504387 | 0 | 1.96675129  | 0.504985075 | 0.764125594 | only in a1H | only in a1H |
| Q61805 | Lipopolysaccharide-binding protein                                     | OS=Mus musculus OX=10090 GN=Lbp PE=1 SV=2            | -[LBP_MOUSE]                                 | Lbp            | 0      | 0 | 0 | 8.843748639  | 0 | 0 | 2.947916213 | 0 | 5.105940657 | 0.504985075 | 0.764125594 | only in a1H | only in a1H |
| Q61830 | Macrophage mannose receptor 1                                          | OS=Mus musculus OX=10090 GN=Mrc1 PE=1 SV=2           | -[MRC1_MOUSE]                                | Mrc1           | 0      | 0 | 0 | 4.917771206  | 0 | 0 | 1.639257069 | 0 | 2.83927653  | 0.504985075 | 0.764125594 | only in a1H | only in a1H |
| Q61982 | Neurogenic locus notch homolog protein 3                               | OS=Mus musculus OX=10090 GN=Notch3 PE=1 SV=1         | -[NOTC3_MOUSE]                               | Notch3         | 0      | 0 | 0 | 26.74769001  | 0 | 0 | 9.195896669 | 0 | 15.44728663 | 0.504985075 | 0.764125594 | only in a1H | only in a1H |
| Q62036 | Centrosomal protein of 131 kDa                                         | OS=Mus musculus OX=10090 GN=Cep131 PE=1 SV=2         | -[CP131_MOUSE]                               | Cep131         | 0      | 0 | 0 | 19.52115949  | 0 | 0 | 6.507051163 | 0 | 11.27054660 | 0.504985075 | 0.764125594 | only in a1H | only in a1H |
| Q62093 | Serine/arginine-rich splicing factor 2                                 | OS=Mus musculus OX=10090 GN=Slrsf2 PE=1 SV=4         | -[SRSF2_MOUSE]                               | Slrsf2         | 0      | 0 | 0 | 72.59889832  | 0 | 0 | 24.19932777 | 0 | 41.91499349 | 0.504985075 | 0.764125594 | only in a1H | only in a1H |
| Q62095 | ATP-dependent RNA helicase DDX3Y                                       | OS=Mus musculus OX=10090 GN=Ddx3y PE=1 SV=2          | -[DDX3Y_MOUSE]                               | Ddx3y          | 0      | 0 | 0 | 55.31862278  | 0 | 0 | 18.43954093 | 0 | 31.93822175 | 0.504985075 | 0.764125594 | only in a1H | only in a1H |
| Q62189 | U1 small nuclear ribonucleoprotein A                                   | OS=Mus musculus OX=10090 GN=Snrpa PE=1 SV=3          | -[SNRPA_MOUSE]                               | Snrpa          | 0      | 0 | 0 | 90.16434819  | 0 | 0 | 30.05478273 | 0 | 52.0564107  | 0.504985075 | 0.764125594 | only in a1H | only in a1H |
| Q62351 | Transferrin receptor protein 1                                         | OS=Mus musculus OX=10090 GN=Tfrc PE                  |                                              |                |        |   |   |              |   |   |             |   |             |             |             |             |             |

|        |                                                                                                                                    |          |   |   |   |             |   |             |   |             |   |             |             |             |             |             |
|--------|------------------------------------------------------------------------------------------------------------------------------------|----------|---|---|---|-------------|---|-------------|---|-------------|---|-------------|-------------|-------------|-------------|-------------|
| QB0X82 | Symplekin OS=Mus musculus OX=10090 GN=Sympk PE=1 SV=2 - [SYMPK_MOUSE]                                                              | Cnypk    | 0 | 0 | 0 | 4.832409246 | 0 | 0           | 0 | 1.610803082 | 0 | 2.789992771 | 0.504985075 | 0.764125594 | only in a1H | only in a1H |
| QB0Y17 | Lethal(2) giant larvae protein homolog 1 OS=Mus musculus OX=10090 GN=Lig1 PE=1 SV=1 - [L2GL1_MOUSE]                                | Lig1     | 0 | 0 | 0 | 12.80588873 | 0 | 0           | 0 | 4.26863291  | 0 | 7.393448079 | 0.504985075 | 0.764125594 | only in a1H | only in a1H |
| QB0YN3 | Breast carcinoma-amplified sequence 1 homolog OS=Mus musculus OX=10090 GN=Bcas1 PE=1 SV=3 - [BCA1_MOUSE]                           | Bcas1    | 0 | 0 | 0 | 9.4063593   | 0 | 0           | 0 | 6.468786432 | 0 | 11.20426676 | 0.504985075 | 0.764125594 | only in a1H | only in a1H |
| QB10A7 | ATP-dependent RNA helicase DDX42 OS=Mus musculus OX=10090 GN=DDx42 PE=1 SV=3 - [DDX42_MOUSE]                                       | Ddx42    | 0 | 0 | 0 | 18.87223499 | 0 | 0           | 0 | 6.290744998 | 0 | 10.89588895 | 0.504985075 | 0.764125594 | only in a1H | only in a1H |
| QB10J3 | Neurofascin OS=Mus musculus OX=10090 GN=Nfasc PE=1 SV=1 - [NFASC_MOUSE]                                                            | Nfasc    | 0 | 0 | 0 | 12.54385974 | 0 | 0           | 0 | 4.431286587 | 0 | 7.24200397  | 0.504985075 | 0.764125594 | only in a1H | only in a1H |
| QB10J9 | RING finger protein 214 OS=Mus musculus OX=10090 GN=Rnf214 PE=1 SV=1 - [RNF214_MOUSE]                                              | Rnf214   | 0 | 0 | 0 | 4.970925641 | 0 | 0           | 0 | 1.666975214 | 0 | 2.869962527 | 0.504985075 | 0.764125594 | only in a1H | only in a1H |
| QB8G52 | Bola-like protein 2 OS=Mus musculus OX=10090 GN=Bola2 PE=1 SV=1 - [BOLA2_MOUSE]                                                    | Bola2    | 0 | 0 | 0 | 71.62939916 | 0 | 0           | 0 | 23.87646639 | 0 | 41.35525289 | 0.504985075 | 0.764125594 | only in a1H | only in a1H |
| QB8G78 | Phytanoyl-CoA hydroxylase-interacting protein-like OS=Mus musculus OX=10090 GN=Phyhlpl PE=1 SV=1 - [PHYHL_MOUSE]                   | Phyhlpl  | 0 | 0 | 0 | 42.93628055 | 0 | 0           | 0 | 14.31209532 | 0 | 24.78923713 | 0.504985075 | 0.764125594 | only in a1H | only in a1H |
| QB8GJ1 | Alpha-ketoglutarate-dependent dioxygenase FTO OS=Mus musculus OX=10090 GN=Fto PE=1 SV=1 - [FTO_MOUSE]                              | Fto      | 0 | 0 | 0 | 3.447669723 | 0 | 0           | 0 | 1.149232241 | 0 | 1.990513043 | 0.504985075 | 0.764125594 | only in a1H | only in a1H |
| QB8H43 | Wiskott-Aldrich syndrome protein family member 2 OS=Mus musculus OX=10090 GN=Wasf2 PE=1 SV=1 - [WASF2_MOUSE]                       | Wasf2    | 0 | 0 | 0 | 15.8872529  | 0 | 0           | 0 | 5.295750965 | 0 | 9.172509736 | 0.504985075 | 0.764125594 | only in a1H | only in a1H |
| QB8H53 | Cilia- and flagella-associated protein 69 OS=Mus musculus OX=10090 GN=Cfap69 PE=1 SV=1 - [CFA69_MOUSE]                             | Cfap69   | 0 | 0 | 0 | 3.226956318 | 0 | 0           | 0 | 1.07652106  | 0 | 1.863804099 | 0.504985075 | 0.764125594 | only in a1H | only in a1H |
| QB8K63 | Casein kinase I isoform alpha OS=Mus musculus OX=10090 GN=Cskn1a1 PE=1 SV=2 - [CKIA_MOUSE]                                         | Cskn1a1  | 0 | 0 | 0 | 10.58711893 | 0 | 0           | 0 | 3.529039643 | 0 | 6.112475964 | 0.504985075 | 0.764125594 | only in a1H | only in a1H |
| QB8K71 | Glypican-2 OS=Mus musculus OX=10090 GN=Gpc2 PE=2 SV=1 - [GPC2_MOUSE]                                                               | Gpc2     | 0 | 0 | 0 | 7.170575382 | 0 | 0           | 0 | 2.390179194 | 0 | 4.139933627 | 0.504985075 | 0.764125594 | only in a1H | only in a1H |
| QB8L56 | Early endosome antigen 1 OS=Mus musculus OX=10090 GN=Ea1 PE=1 SV=2 - [EA1_MOUSE]                                                   | Ea1      | 0 | 0 | 0 | 24.92170129 | 0 | 0           | 0 | 8.307233764 | 0 | 14.38855095 | 0.504985075 | 0.764125594 | only in a1H | only in a1H |
| QB8P56 | Protein-glucosylgalactosylhydroxylaseinase glucosidase OS=Mus musculus OX=10090 GN=Pgggh PE=1 SV=1 - [PGGH_MOUSE]                  | Pgggh    | 0 | 0 | 0 | 21.74618772 | 0 | 0           | 0 | 7.24872924  | 0 | 12.55516733 | 0.504985075 | 0.764125594 | only in a1H | only in a1H |
| QB8O89 | LX1-like protein OS=Mus musculus OX=10090 GN=Lx1l PE=2 SV=2 - [LXL1_MOUSE]                                                         | Lx1l     | 0 | 0 | 0 | 24.0238193  | 0 | 0           | 0 | 8.007939766 | 0 | 13.87015854 | 0.504985075 | 0.764125594 | only in a1H | only in a1H |
| QB8P55 | Kelch-like protein 38 OS=Mus musculus OX=10090 GN=Khlh38 PE=2 SV=1 - [KLH38_MOUSE]                                                 | Khlh38   | 0 | 0 | 0 | 38.31003556 | 0 | 0           | 0 | 12.77001185 | 0 | 22.11830934 | 0.504985075 | 0.764125594 | only in a1H | only in a1H |
| QB8T54 | Nuclear pore complex protein Nup54 OS=Mus musculus OX=10090 GN=Nup54 PE=1 SV=1 - [NUPS4_MOUSE]                                     | Nup54    | 0 | 0 | 0 | 16.84921152 | 0 | 0           | 0 | 5.61640384  | 0 | 9.727896807 | 0.504985075 | 0.764125594 | only in a1H | only in a1H |
| QB8W55 | G protein-regulated inducer of neurite outgrowth 3 OS=Mus musculus OX=10090 GN=Gprin3 PE=1 SV=1 - [GRIN3_MOUSE]                    | Gprin3   | 0 | 0 | 0 | 65.05703803 | 0 | 0           | 0 | 21.66069394 | 0 | 37.56069842 | 0.504985075 | 0.764125594 | only in a1H | only in a1H |
| QB8W71 | 3-ketoacyl-CoA thiolase, mitochondrial OS=Mus musculus OX=10090 GN=Acaa2 PE=1 SV=3 - [THIM_MOUSE]                                  | Acaa2    | 0 | 0 | 0 | 19.95541258 | 0 | 0           | 0 | 6.651804937 | 0 | 11.52126411 | 0.504985075 | 0.764125594 | only in a1H | only in a1H |
| QB8Z55 | F-box/leucine-repeat protein 5 OS=Mus musculus OX=10090 GN=Fbx5 PE=2 SV=2 - [FBXL5_MOUSE]                                          | Fbx5     | 0 | 0 | 0 | 8.561220789 | 0 | 0           | 0 | 3.862120789 | 0 | 14.82846938 | 0.504985075 | 0.764125594 | only in a1H | only in a1H |
| QB8C13 | CCR-NOT transcription complex subunit 2 OS=Mus musculus OX=10090 GN=Cnot2 PE=2 SV=2 - [CNOT2_MOUSE]                                | Cnot2    | 0 | 0 | 0 | 7.721010706 | 0 | 0           | 0 | 4.45772761  | 0 | 5.04085085  | 0.504985075 | 0.764125594 | only in a1H | only in a1H |
| QB8C2  | NHL repeat-containing protein 3 OS=Mus musculus OX=10090 GN=Nhr3c PE=1 SV=1 - [NHR3_MOUSE]                                         | Nhr3c    | 0 | 0 | 0 | 12.25595196 | 0 | 0           | 0 | 4.085317321 | 0 | 7.075977165 | 0.504985075 | 0.764125594 | only in a1H | only in a1H |
| QB8C4  | ATPase family AAA domain-containing protein 2 OS=Mus musculus OX=10090 GN=Atad2 PE=1 SV=1 - [ATAD2_MOUSE]                          | Atad2    | 0 | 0 | 0 | 6.420013111 | 0 | 0           | 0 | 2.1400037   | 0 | 3.706596298 | 0.504985075 | 0.764125594 | only in a1H | only in a1H |
| QB8GA0 | Protein phosphatase 1F OS=Mus musculus OX=10090 GN=Ppm1f PE=1 SV=1 - [PPM1F_MOUSE]                                                 | Ppm1f    | 0 | 0 | 0 | 29.72470538 | 0 | 0           | 0 | 9.908235127 | 0 | 17.16156665 | 0.504985075 | 0.764125594 | only in a1H | only in a1H |
| QB8ZP2 | Synapsin-3 OS=Mus musculus OX=10090 GN=Syn3 PE=1 SV=2 - [SYN3_MOUSE]                                                               | Syn3     | 0 | 0 | 0 | 81.66880757 | 0 | 0           | 0 | 27.22293286 | 0 | 47.15150804 | 0.504985075 | 0.764125594 | only in a1H | only in a1H |
| QB8K17 | Serine/threonine-protein kinase Nek9 OS=Mus musculus OX=10090 GN=Nek9 PE=1 SV=2 - [NEK9_MOUSE]                                     | Nek9     | 0 | 0 | 0 | 22.63983009 | 0 | 0           | 0 | 7.54661003  | 0 | 13.071112   | 0.504985075 | 0.764125594 | only in a1H | only in a1H |
| QB8Z21 | Arfaptin-2 OS=Mus musculus OX=10090 GN=Arfp2 PE=1 SV=2 - [ARFP2_MOUSE]                                                             | Arfp2    | 0 | 0 | 0 | 3.631706132 | 0 | 0           | 0 | 1.21056871  | 0 | 2.096766513 | 0.504985075 | 0.764125594 | only in a1H | only in a1H |
| QB8Z74 | Ketoseamine-3-kinase OS=Mus musculus OX=10090 GN=K3kcp PE=1 SV=2 - [K3K_MOUSE]                                                     | K3kcp    | 0 | 0 | 0 | 6.454945201 | 0 | 0           | 0 | 2.1516484   | 0 | 3.726764349 | 0.504985075 | 0.764125594 | only in a1H | only in a1H |
| QB8A11 | Presequence protease, mitochondrial OS=Mus musculus OX=10090 GN=Ppm1l PE=1 SV=1 - [PREP_MOUSE]                                     | Ppm1l    | 0 | 0 | 0 | 6.656918515 | 0 | 0           | 0 | 2.218972838 | 0 | 3.845373696 | 0.504985075 | 0.764125594 | only in a1H | only in a1H |
| QB8P9  | Acylglyoxalase F4HD1, mitochondrial OS=Mus musculus OX=10090 GN=F4hd1 PE=1 SV=2 - [F4HD1_MOUSE]                                    | F4hd1    | 0 | 0 | 0 | 14.62971848 | 0 | 0           | 0 | 4.876572827 | 0 | 8.446471903 | 0.504985075 | 0.764125594 | only in a1H | only in a1H |
| QB8L10 | Zinc finger protein 830 OS=Mus musculus OX=10090 GN=Znr830 PE=1 SV=1 - [ZNR830_MOUSE]                                              | Znr830   | 0 | 0 | 0 | 10.0739671  | 0 | 0           | 0 | 3.357989032 | 0 | 5.816207615 | 0.504985075 | 0.764125594 | only in a1H | only in a1H |
| QB8Z9  | AP-3 complex subunit mu-2 OS=Mus musculus OX=10090 GN=Ap3m2 PE=1 SV=1 - [AP3M2_MOUSE]                                              | Ap3m2    | 0 | 0 | 0 | 53.67234802 | 0 | 0           | 0 | 17.89078267 | 0 | 30.98774458 | 0.504985075 | 0.764125594 | only in a1H | only in a1H |
| QB8Z25 | von Willebrand factor A domain-containing protein 1 OS=Mus musculus OX=10090 GN=Wva1 PE=1 SV=1 - [VWA1_MOUSE]                      | Wva1     | 0 | 0 | 0 | 0           | 0 | 6.426626046 | 0 | 2.142208862 | 0 | 3.710414278 | 0.504985075 | 0.764125594 | only in a1H | only in a1H |
| QB83B1 | 1-phosphatidylinositol 4,5-bisphosphate phosphodiesterase delta-1 OS=Mus musculus OX=10090 GN=Pldc1 PE=1 SV=2 - [PLDC1_MOUSE]      | Pldc1    | 0 | 0 | 0 | 3.994449943 | 0 | 0           | 0 | 1.331483314 | 0 | 2.30619675  | 0.504985075 | 0.764125594 | only in a1H | only in a1H |
| QB8R38 | Gamma-aminobutyric acid receptor-associated protein-like 1 OS=Mus musculus OX=10090 GN=Gabarap1 PE=1 SV=2 - [GBRL_MOUSE]           | Gabarap1 | 0 | 0 | 0 | 9.001176528 | 0 | 0           | 0 | 3.000392176 | 0 | 5.196831692 | 0.504985075 | 0.764125594 | only in a1H | only in a1H |
| QB8R35 | Endophilin-B2 OS=Mus musculus OX=10090 GN=Sh3glb2 PE=1 SV=2 - [SHL2_MOUSE]                                                         | Sh3glb2  | 0 | 0 | 0 | 15.5017347  | 0 | 0           | 0 | 5.1672449   | 0 | 8.949390701 | 0.504985075 | 0.764125594 | only in a1H | only in a1H |
| QB8R40 | Protein HEXIM1 OS=Mus musculus OX=10090 GN=Hexim1 PE=1 SV=1 - [HEX1_MOUSE]                                                         | Hexim1   | 0 | 0 | 0 | 21.45623292 | 0 | 0           | 0 | 7.152077638 | 0 | 12.38776185 | 0.504985075 | 0.764125594 | only in a1H | only in a1H |
| QB8R40 | Nuclear pore complex protein Nup85 OS=Mus musculus OX=10090 GN=Nup85 PE=1 SV=1 - [NUPS5_MOUSE]                                     | Nup85    | 0 | 0 | 0 | 4.292540826 | 0 | 0           | 0 | 1.431180275 | 0 | 2.47887692  | 0.504985075 | 0.764125594 | only in a1H | only in a1H |
| QB8V62 | Polyadenylate-binding protein-interacting protein 1 OS=Mus musculus OX=10090 GN=Paip1 PE=1 SV=1 - [PAIP1_MOUSE]                    | Paip1    | 0 | 0 | 0 | 33.44857923 | 0 | 0           | 0 | 11.14952641 | 0 | 19.31154622 | 0.504985075 | 0.764125594 | only in a1H | only in a1H |
| QB8V14 | Netchless protein homolog 1 OS=Mus musculus OX=10090 GN=Nle1 PE=4 SV=4 - [NLE1_MOUSE]                                              | Nle1     | 0 | 0 | 0 | 10.36654903 | 0 | 0           | 0 | 3.455515344 | 0 | 5.985129874 | 0.504985075 | 0.764125594 | only in a1H | only in a1H |
| QB8V51 | RNA-binding protein 39 OS=Mus musculus OX=10090 GN=Rbm39 PE=1 SV=2 - [RBM39_MOUSE]                                                 | Rbm39    | 0 | 0 | 0 | 40.30126586 | 0 | 0           | 0 | 13.43375429 | 0 | 23.2679467  | 0.504985075 | 0.764125594 | only in a1H | only in a1H |
| QB1V87 | Fibroblast growth factor receptor-like 1 OS=Mus musculus OX=10090 GN=Fgfr1l PE=1 SV=1 - [FGR1L_MOUSE]                              | Fgfr1l   | 0 | 0 | 0 | 15.040961   | 0 | 0           | 0 | 5.013653666 | 0 | 8.683920861 | 0.504985075 | 0.764125594 | only in a1H | only in a1H |
| QB1VX2 | Ubiquitin-associated protein 2 OS=Mus musculus OX=10090 GN=Ubp2 PE=1 SV=1 - [UBAP2_MOUSE]                                          | Ubp2     | 0 | 0 | 0 | 17.29734883 | 0 | 0           | 0 | 5.765782945 | 0 | 9.986629006 | 0.504985075 | 0.764125594 | only in a1H | only in a1H |
| QB1W39 | Nuclear receptor coactivator 5 OS=Mus musculus OX=10090 GN=Ncoa5 PE=1 SV=1 - [NCOA5_MOUSE]                                         | Ncoa5    | 0 | 0 | 0 | 46.58266726 | 0 | 0           | 0 | 15.52755575 | 0 | 26.89451548 | 0.504985075 | 0.764125594 | only in a1H | only in a1H |
| QB1W39 | U4/U6 small nuclear ribonucleoprotein Prp3 OS=Mus musculus OX=10090 GN=Prp3 PE=1 SV=1 - [PRP3_MOUSE]                               | Prp3     | 0 | 0 | 0 | 4.473085848 | 0 | 0           | 0 | 1.491028616 | 0 | 2.582537319 | 0.504985075 | 0.764125594 | only in a1H | only in a1H |
| QB1X52 | Lysylisomerase OS=Mus musculus OX=10090 GN=Lis1 PE=1 SV=2 - [LIS1_MOUSE]                                                           | Lis1     | 0 | 0 | 0 | 23.12077233 | 0 | 0           | 0 | 7.18629411  | 0 | 13.34078093 | 0.504985075 | 0.764125594 | only in a1H | only in a1H |
| QB1X24 | Protocadherin beta-6 OS=Mus musculus OX=10090 GN=Pcdhb6 PE=1 SV=1 - [PCDB6_MOUSE]                                                  | Pcdhb6   | 0 | 0 | 0 | 0           | 0 | 30.27960725 | 0 | 10.09324202 | 0 | 17.4819394  | 0.504985075 | 0.764125594 | only in a1H | only in a1H |
| QB2O89 | FACT complex subunit SPT16 OS=Mus musculus OX=10090 GN=Supt16h PE=1 SV=2 - [SPT16H_MOUSE]                                          | Supt16h  | 0 | 0 | 0 | 31.31010913 | 0 | 0           | 0 | 10.43670304 | 0 | 18.07689994 | 0.504985075 | 0.764125594 | only in a1H | only in a1H |
| QB2O80 | Ailin OS=Mus musculus OX=10090 GN=Ail2 PE=1 SV=3 - [ALS2_MOUSE]                                                                    | Ail2     | 0 | 0 | 0 | 169.2020694 | 0 | 0           | 0 | 56.4006889  | 0 | 97.68886032 | 0.504985075 | 0.764125594 | only in a1H | only in a1H |
| QB21V5 | Alpha-1,6-mannosyl glycoprotein 2-beta-N-acetylglucosaminyltransferase OS=Mus musculus OX=10090 GN=Mgat2 PE=1 SV=1 - [MGAT2_MOUSE] | Mgat2    | 0 | 0 | 0 | 21.41691981 | 0 | 0           | 0 | 7.138973269 | 0 | 12.36506442 | 0.504985075 | 0.764125594 | only in a1H | only in a1H |
| QB2Z74 | Tubulin beta-6 chain OS=Mus musculus OX=10090 GN=Tubb6 PE=1 SV=1 - [TBB6_MOUSE]                                                    | Tubb6    | 0 | 0 | 0 | 966.8537363 | 0 | 0           | 0 | 322.2845788 | 0 | 558.2132649 | 0.504985075 | 0.764125594 | only in a1H | only in a1H |
| QB2ZK7 | Probable 28S rRNA (cytosine-C5)-methyltransferase OS=Mus musculus OX=10090 GN=Nop2 PE=1 SV=1 - [NOP2_MOUSE]                        | Nop2     | 0 | 0 | 0 | 292.0543556 | 0 | 0           | 0 | 97.35145188 | 0 | 168.6176608 | 0.504985075 | 0.764125594 | only in a1H | only in a1H |
| QB2Z54 | cGMP-dependent 3',5'-cyclic phosphodiesterase OS=Mus musculus OX=10090 GN=Pde2a PE=1 SV=4 - [PDE2A_MOUSE]                          | Pde2a    | 0 | 0 | 0 | 59.96483982 | 0 | 0           | 0 | 19.98827994 | 0 | 34.62071641 | 0.504985075 | 0.764125594 | only in a1H | only in a1H |
| QB2ZU1 | U4/U6 small nuclear ribonucleoprotein Prp3 OS=Mus musculus OX=10090 GN=Prp3 PE=1 SV=1 - [PRP3_MOUSE]                               | Prp3     | 0 | 0 | 0 | 11.37995205 | 0 | 0           | 0 | 3.793173951 | 0 | 6.570218381 | 0.504985075 | 0.764125594 | only in a1H | only in a1H |
| QB2XK6 | Low-density lipoprotein receptor-related protein 8 OS=Mus musculus OX=10090 GN=Lrp8 PE=1 SV=2 - [LRP8_MOUSE]                       | Lrp8     | 0 | 0 | 0 | 15.79276713 | 0 | 0           | 0 | 5.264257711 | 0 | 9.117958355 | 0.504985075 | 0.764125594 | only in a1H | only in a1H |
| QB9104 | Unconventional myosin-Va OS=Mus musculus OX=10090 GN=Myo5a PE=1 SV=2 - [MYO5A_MOUSE]                                               | Myo5a    | 0 | 0 | 0 | 11.0859571  | 0 | 0           | 0 | 3.695325033 | 0 | 6.400490708 | 0.504985075 | 0.764125594 | only in a1H | only in a1H |
| QB9JF5 | Diphosphomevalonate decarboxylase OS=Mus musculus OX=10090 GN=Mvd PE=1 SV=2 - [MVD1_MOUSE]                                         | Mvd      | 0 | 0 | 0 | 7.715251905 | 0 | 0           | 0 | 2.571750635 | 0 | 4.454402764 | 0.504985075 | 0.764125594 | only in a1H | only in a1H |
| QB9JF4 | Anaphase-promoting complex subunit CDC26 OS=Mus musculus OX=10090 GN=Cdc26 PE=1 SV=1 - [CDC26_MOUSE]                               | Cdc26    | 0 | 0 | 0 | 10.50582333 | 0 | 0           | 0 | 3.50194118  | 0 | 6.065539925 | 0.504985075 | 0.764125594 | only in a1H | only in a1H |
| QB9JF9 | 1,2-dihydroxy-3-keto-5-methylthiopentane dioxygenase OS=Mus musculus OX=10090 GN=Adi                                               |          |   |   |   |             |   |             |   |             |   |             |             |             |             |             |

|        |                                                              |                                    |           |               |         |             |   |   |             |   |   |             |             |             |              |             |              |              |              |
|--------|--------------------------------------------------------------|------------------------------------|-----------|---------------|---------|-------------|---|---|-------------|---|---|-------------|-------------|-------------|--------------|-------------|--------------|--------------|--------------|
| Q9D6V7 | Mitochondrial peptidomethionine sulfoxide reductase          | 05+Mus musculus OX10090 GN=MsrA    | Pe1 Sv1-1 | [MSRA_MOUSE]  | MsrA    | 0           | 0 | 0 | 46.90096321 | 0 | 0 | 0           | 15.6336544  | 0           | 27.07828374  | 0.504985075 | 0.764125594  | only in a1H  | only in a1H  |
| Q9D753 | Exosome complex component RRP43                              | 05+Mus musculus OX10090 GN=Exoc8   | Pe1 Sv1-1 | [EXOS_MOUSE]  | Exoc8   | 0           | 0 | 0 | 21.78426814 | 0 | 0 | 0           | 7.261422712 | 0           | 12.571715307 | 0.504985075 | 0.764125594  | only in a1H  | only in a1H  |
| Q9D8T3 | GTPase Rheb1L                                                | 05+Mus musculus OX10090 GN=Rheb1   | Pe1 Sv1-1 | [REB1_MOUSE]  | Rheb1   | 0           | 0 | 0 | 23.02674008 | 0 | 0 | 0           | 0.675580028 | 0           | 13.29449459  | 0.504985075 | 0.764125594  | only in a1H  | only in a1H  |
| Q9DAW6 | U4/U6 small nuclear ribonucleoprotein Prp4                   | 05+Mus musculus OX10090 GN=Prp4    | Pe1 Sv1-1 | [PRP_MOUSE]   | Prp4    | 0           | 0 | 0 | 14.87232689 | 0 | 0 | 0           | 4.927442729 | 0           | 8.534580411  | 0.504985075 | 0.764125594  | only in a1H  | only in a1H  |
| Q9DB20 | ATP synthase subunit O, mitochondrial                        | 05+Mus musculus OX10090 GN=Atp5p   | Pe1 Sv1-1 | [ATPO_MOUSE]  | Atp5p   | 0           | 0 | 0 | 4.506698188 | 0 | 0 | 0           | 1.502312729 | 0           | 2.602081976  | 0.504985075 | 0.764125594  | only in a1H  | only in a1H  |
| Q9DBT5 | ATP deaminase 2                                              | 05+Mus musculus OX10090 GN=Ampe2   | Pe1 Sv1-1 | [AMPD2_MOUSE] | Ampe2   | 0           | 0 | 0 | 2.285963683 | 0 | 0 | 0           | 0.761987894 | 0           | 1.315801748  | 0.504985075 | 0.764125594  | only in a1H  | only in a1H  |
| Q9DCES | p21-activated protein kinase-interacting protein 1           | 05+Mus musculus OX10090 GN=Pak1ip1 | Pe1 Sv1-1 | [PKIP1_MOUSE] | Pak1ip1 | 0           | 0 | 0 | 20.38889284 | 0 | 0 | 0           | 6.796276214 | 0           | 11.77149588  | 0.504985075 | 0.764125594  | only in a1H  | only in a1H  |
| Q9DCK3 | Tetraspanin-4                                                | 05+Mus musculus OX10090 GN=Tspan4  | Pe1 Sv1-1 | [TSN4_MOUSE]  | Tspan4  | 0           | 0 | 0 | 54.05012774 | 0 | 0 | 0           | 18.01671625 | 0           | 31.20588178  | 0.504985075 | 0.764125594  | only in a1H  | only in a1H  |
| Q9EP19 | ADP-ribosylation factor GTPase-activating protein 1          | 05+Mus musculus OX10090 GN=Arfgap1 | Pe1 Sv1-1 | [ARFG_MOUSE]  | Arfgap1 | 0           | 0 | 0 | 29.94754685 | 0 | 0 | 0           | 9.982515616 | 0           | 17.29022423  | 0.504985075 | 0.764125594  | only in a1H  | only in a1H  |
| Q9EQF6 | Dihydropyrimidinase-related protein 5                        | 05+Mus musculus OX10090 GN=Dpyl5   | Pe1 Sv1-1 | [DPYL5_MOUSE] | Dpyl5   | 0           | 0 | 0 | 14.62265204 | 0 | 0 | 0           | 13.75450085 | 0           | 23.82505315  | 0.504985075 | 0.764125594  | only in a1H  | only in a1H  |
| Q9ERV7 | p53-induced death domain-containing protein 1                | 05+Mus musculus OX10090 GN=Pidd1   | Pe1 Sv1-1 | [PIDO1_MOUSE] | Pidd1   | 0           | 0 | 0 | 82.70093866 | 0 | 0 | 0           | 27.5667995  | 0           | 47.7474092   | 0.504985075 | 0.764125594  | only in a1H  | only in a1H  |
| Q9ES97 | Reticulon-3                                                  | 05+Mus musculus OX10090 GN=Rtn3    | Pe1 Sv1-1 | [RTN3_MOUSE]  | Rtn3    | 0           | 0 | 0 | 175.3209489 | 0 | 0 | 0           | 58.44301632 | 0           | 101.2267376  | 0.504985075 | 0.764125594  | only in a1H  | only in a1H  |
| Q9ESD7 | Dysferlin                                                    | 05+Mus musculus OX10090 GN=Dyfl    | Pe1 Sv1-3 | [DYFL_MOUSE]  | Dyfl    | 0           | 0 | 0 | 4.147964103 | 0 | 0 | 0           | 1.382654701 | 0           | 2.394828191  | 0.504985075 | 0.764125594  | only in a1H  | only in a1H  |
| Q9ESN6 | Tripartite motif-containing protein 2                        | 05+Mus musculus OX10090 GN=Trim2   | Pe1 Sv1-1 | [TRIM2_MOUSE] | Trim2   | 0           | 0 | 0 | 7.97784253  | 0 | 0 | 0           | 2.659920843 | 0           | 4.606009532  | 0.504985075 | 0.764125594  | only in a1H  | only in a1H  |
| Q9EST4 | Proteasome assembly chaperone 2                              | 05+Mus musculus OX10090 GN=Psmg2   | Pe1 Sv1-1 | [PSMG2_MOUSE] | Psmg2   | 0           | 0 | 0 | 8.65036815  | 0 | 0 | 0           | 2.883456052 | 0           | 4.994292383  | 0.504985075 | 0.764125594  | only in a1H  | only in a1H  |
| Q9JKW0 | ARF-ribosylation factor-like protein 6-interacting protein 1 | 05+Mus musculus OX10090 GN=Arfip1  | Pe1 Sv1-1 | [ARFP1_MOUSE] | Arfip1  | 0           | 0 | 0 | 68.28165115 | 0 | 0 | 0           | 22.74605505 | 0           | 39.3973230   | 0.504985075 | 0.764125594  | only in a1H  | only in a1H  |
| Q9JKY0 | CCR4-NOT transcription complex subunit 9                     | 05+Mus musculus OX10090 GN=Cnot9   | Pe1 Sv1-1 | [CNOT9_MOUSE] | Cnot9   | 0           | 0 | 0 | 24.23298655 | 0 | 0 | 0           | 8.077662183 | 0           | 13.99092131  | 0.504985075 | 0.764125594  | only in a1H  | only in a1H  |
| Q9JLC8 | Sacsin                                                       | 05+Mus musculus OX10090 GN=Sacs    | Pe1 Sv1-1 | [SACS_MOUSE]  | Sacs    | 0           | 0 | 0 | 1164.653669 | 0 | 0 | 0           | 388.2138897 | 0           | 672.4131094  | 0.504985075 | 0.764125594  | only in a1H  | only in a1H  |
| Q9JLQ2 | ARF GTPase-activating protein GIT2                           | 05+Mus musculus OX10090 GN=Git2    | Pe1 Sv1-1 | [GIT2_MOUSE]  | Git2    | 0           | 0 | 0 | 5.68444032  | 0 | 0 | 25.31561318 | 1.89481344  | 3.281913149 | 0.504985075  | 0.764125594 | only in a1H  | only in a1H  |              |
| Q9QVW7 | Transcription elongation factor A protein 2                  | 05+Mus musculus OX10090 GN=Tcea2   | Pe1 Sv1-1 | [TCEA2_MOUSE] | Tcea2   | 0           | 0 | 0 | 0           | 0 | 0 | 0           | 8.438537226 | 0           | 14.61597608  | 0.504985075 | 0.764125594  | only in a1H  | only in a1H  |
| Q9QVW8 | Alpha-N-acetylglucosaminidase                                | 05+Mus musculus OX10090 GN=Naga    | Pe1 Sv1-1 | [NAGA_MOUSE]  | Naga    | 0           | 0 | 0 | 6.657900346 | 0 | 0 | 0           | 2.219300115 | 0           | 3.84949057   | 0.504985075 | 0.764125594  | only in a1H  | only in a1H  |
| Q9QCA1 | Cytidine and histidine-rich protein 2                        | 05+Mus musculus OX10090 GN=Cchr1   | Pe1 Sv1-1 | [CHRH1_MOUSE] | Cchr1   | 0           | 0 | 0 | 19.42474019 | 0 | 0 | 0           | 6.474933397 | 0           | 11.21487898  | 0.504985075 | 0.764125594  | only in a1H  | only in a1H  |
| Q9QXN0 | Protein Shroom3                                              | 05+Mus musculus OX10090 GN=Shroom3 | Pe1 Sv1-1 | [SHRM3_MOUSE] | Shroom3 | 0           | 0 | 0 | 0           | 0 | 0 | 0           | 741.7152159 | 0           | 247.2384053  | 0.504985075 | 0.764125594  | only in a1H  | only in a1H  |
| Q9QY76 | Vesicle-associated membrane protein-associated protein B     | 05+Mus musculus OX10090 GN=Vapb    | Pe1 Sv1-1 | [VAPB_MOUSE]  | Vapb    | 0           | 0 | 0 | 215.9574133 | 0 | 0 | 0           | 71.98580444 | 0           | 124.683707   | 0.504985075 | 0.764125594  | only in a1H  | only in a1H  |
| Q9QZH3 | Peptidyl-prolyl cis-trans isomerase E                        | 05+Mus musculus OX10090 GN=Ppie    | Pe1 Sv1-1 | [PIPIE_MOUSE] | Ppie    | 0           | 0 | 0 | 27.34416386 | 0 | 0 | 0           | 9.114721286 | 0           | 15.78716036  | 0.504985075 | 0.764125594  | only in a1H  | only in a1H  |
| Q9R0D8 | WD repeat-containing protein 54                              | 05+Mus musculus OX10090 GN=Wdr54   | Pe1 Sv1-1 | [WDR54_MOUSE] | Wdr54   | 0           | 0 | 0 | 6.156483355 | 0 | 0 | 0           | 2.05216118  | 0           | 3.55447322   | 0.504985075 | 0.764125594  | only in a1H  | only in a1H  |
| Q9RWK5 | Nuclear factor NF-kappa-B p100 subunit                       | 05+Mus musculus OX10090 GN=NfkB2   | Pe1 Sv1-1 | [NFKB2_MOUSE] | NfkB2   | 0           | 0 | 0 | 4.24816314  | 0 | 0 | 0           | 1.414943871 | 0           | 2.450754675  | 0.504985075 | 0.764125594  | only in a1H  | only in a1H  |
| Q9W7X8 | Mitotic spindle assembly checkpoint protein MAD1             | 05+Mus musculus OX10090 GN=Mad11   | Pe1 Sv1-1 | [MDD11_MOUSE] | Mad11   | 0           | 0 | 0 | 552.4269363 | 0 | 0 | 0           | 184.1423121 | 0           | 318.948404   | 0.504985075 | 0.764125594  | only in a1H  | only in a1H  |
| Q9WV60 | Glycogen synthase kinase-3 beta                              | 05+Mus musculus OX10090 GN=Gsk3b   | Pe1 Sv1-1 | [GSK3B_MOUSE] | Gsk3b   | 0           | 0 | 0 | 15.42272191 | 0 | 0 | 0           | 5.140923969 | 0           | 8.904341512  | 0.504985075 | 0.764125594  | only in a1H  | only in a1H  |
| Q9Z0E0 | Neurochondrin                                                | 05+Mus musculus OX10090 GN=Ncn     | Pe1 Sv1-1 | [NCDN_MOUSE]  | Ncn     | 0           | 0 | 0 | 8.553881352 | 0 | 0 | 0           | 2.851127117 | 0           | 4.938297026  | 0.504985075 | 0.764125594  | only in a1H  | only in a1H  |
| Q9Z0U0 | NPC intracellular cholesterol transporter 2                  | 05+Mus musculus OX10090 GN=Npc2    | Pe1 Sv1-1 | [NPC2_MOUSE]  | Npc2    | 0           | 0 | 0 | 28.60642329 | 0 | 0 | 0           | 9.935474428 | 0           | 16.51592616  | 0.504985075 | 0.764125594  | only in a1H  | only in a1H  |
| Q9Z0U1 | Tight junction protein ZO-2                                  | 05+Mus musculus OX10090 GN=Tjp2    | Pe1 Sv1-1 | [ZO2_MOUSE]   | Tjp2    | 0           | 0 | 0 | 53.07282987 | 0 | 0 | 0           | 17.69094239 | 0           | 30.64161261  | 0.504985075 | 0.764125594  | only in a1H  | only in a1H  |
| Q9Z175 | Lysyl oxidase homolog 3                                      | 05+Mus musculus OX10090 GN=Loxl3   | Pe1 Sv1-1 | [LOXL3_MOUSE] | Loxl3   | 0           | 0 | 0 | 2.496391408 | 0 | 0 | 0           | 0.832130469 | 0           | 1.44129252   | 0.504985075 | 0.764125594  | only in a1H  | only in a1H  |
| Q9Z2Y2 | Beta-1,4-galactosyltransferase 2                             | 05+Mus musculus OX10090 GN=B4galT2 | Pe1 Sv1-1 | [B4GT2_MOUSE] | B4galT2 | 0           | 0 | 0 | 194.639389  | 0 | 0 | 0           | 64.87979632 | 0           | 112.3751036  | 0.504985075 | 0.764125594  | only in a1H  | only in a1H  |
| AZ9AC3 | KICSTOR complex protein SZT2                                 | 05+Mus musculus OX10090 GN=Szt2    | Pe1 Sv1-1 | [SZT2_MOUSE]  | Szt2    | 74.7014895  | 0 | 0 | 0           | 0 | 0 | 24.9004965  | 0           | 43.12892507 | 0.504985075  | 0.764125594 | only in mock | only in mock |              |
| AZ9AR3 | Melanoma-associated antigen 84                               | 05+Mus musculus OX10090 GN=Mageb4  | Pe1 Sv1-1 | [MAGB4_MOUSE] | Mageb4  | 194.5978598 | 0 | 0 | 0           | 0 | 0 | 64.86595327 | 0           | 112.3511267 | 0.504985075  | 0.764125594 | only in mock | only in mock |              |
| AZAKX3 | Probable helicase senataxin                                  | 05+Mus musculus OX10090 GN=Setx    | Pe1 Sv1-1 | [SETX_MOUSE]  | Setx    | 36.5476317  | 0 | 0 | 0           | 0 | 0 | 12.18254372 | 0           | 21.1007847  | 0.504985075  | 0.764125594 | only in mock | only in mock |              |
| AH5854 | Collagen alpha-5(VI) chain                                   | 05+Mus musculus OX10090 GN=Col5a5  | Pe1 Sv1-1 | [COL5A_MOUSE] | Col5a5  | 145.4448291 | 0 | 0 | 0           | 0 | 0 | 48.8162097  | 0           | 84.55215254 | 0.504985075  | 0.764125594 | only in mock | only in mock |              |
| AH58E9 | Tetratricopeptide repeat protein 2-like                      | 05+Mus musculus OX10090 GN=Trc2l   | Pe1 Sv1-1 | [TRC2L_MOUSE] | Trc2l   | 20.74239824 | 0 | 0 | 0           | 0 | 0 | 8.247466081 | 0           | 14.28503029 | 0.504985075  | 0.764125594 | only in mock | only in mock |              |
| ABC756 | Thyroid adenoma-associated protein homolog                   | 05+Mus musculus OX10090 GN=Thada   | Pe1 Sv1-1 | [THADA_MOUSE] | Thada   | 0           | 0 | 0 | 98.66285605 | 0 | 0 | 0           | 32.87761868 | 0           | 56.9630265   | 0.504985075 | 0.764125594  | only in mock | only in mock |
| DBR8E7 | OTU domain-containing protein 4                              | 05+Mus musculus OX10090 GN=Otu4    | Pe1 Sv1-1 | [OTUD4_MOUSE] | Otu4    | 0           | 0 | 0 | 441.2341814 | 0 | 0 | 0           | 147.0780605 | 0           | 254.7466734  | 0.504985075 | 0.764125594  | only in mock | only in mock |
| DBRY04 | Dedicator of cytokinesis protein 5                           | 05+Mus musculus OX10090 GN=Dock5   | Pe1 Sv1-1 | [DOCK5_MOUSE] | Dock5   | 0           | 0 | 0 | 619.9997505 | 0 | 0 | 0           | 206.6665835 | 0           | 357.9570229  | 0.504985075 | 0.764125594  | only in mock | only in mock |
| OO8585 | Clathrin light chain A                                       | 05+Mus musculus OX10090 GN=Cita    | Pe1 Sv1-1 | [CLCA_MOUSE]  | Cita    | 0           | 0 | 0 | 129.6170397 | 0 | 0 | 0           | 43.20567991 | 0           | 74.8443278   | 0.504985075 | 0.764125594  | only in mock | only in mock |
| OO8663 | Methionine aminopeptidase 2                                  | 05+Mus musculus OX10090 GN=Metap2  | Pe1 Sv1-1 | [MAP2_MOUSE]  | Metap2  | 20.40780835 | 0 | 0 | 0           | 0 | 0 | 6.802360115 | 0           | 11.78203333 | 0.504985075  | 0.764125594 | only in mock | only in mock |              |
| OO8689 | Growth/differentiation factor 8                              | 05+Mus musculus OX10090 GN=Mstn    | Pe1 Sv1-1 | [GDF8_MOUSE]  | Mstn    | 0           | 0 | 0 | 26.62145414 | 0 | 0 | 0           | 8.873818047 | 0           | 15.36990391  | 0.504985075 | 0.764125594  | only in mock | only in mock |
| OO8842 | GDNF family receptor alpha-2                                 | 05+Mus musculus OX10090 GN=Gfra2   | Pe1 Sv1-1 | [GFRA2_MOUSE] | Gfra2   | 28.99315363 | 0 | 0 | 0           | 0 | 0 | 9.664384545 | 0           | 16.73920506 | 0.504985075  | 0.764125594 | only in mock | only in mock |              |
| OO8843 | ATP receptor-interacting protein 5                           | 05+Mus musculus OX10090 GN=Airp    | Pe1 Sv1-1 | [AIRP_MOUSE]  | Airp    | 17.55406075 | 0 | 0 | 0           | 0 | 0 | 5.851534916 | 0           | 10.13515578 | 0.504985075  | 0.764125594 | only in mock | only in mock |              |
| OO9167 | 60S ribosomal protein L21                                    | 05+Mus musculus OX10090 GN=Rpl21   | Pe1 Sv1-1 | [RL21_MOUSE]  | Rpl21   | 44.99311314 | 0 | 0 | 0           | 0 | 0 | 14.97107378 | 0           | 25.9411047  | 0.504985075  | 0.764125594 | only in mock | only in mock |              |
| OS1536 | Neural cell adhesion molecule 2                              | 05+Mus musculus OX10090 GN=Ncam2   | Pe1 Sv1-1 | [NCAM2_MOUSE] | Ncam2   | 74.78286532 | 0 | 0 | 0           | 0 | 0 | 24.92762177 | 0           | 43.17590742 | 0.504985075  | 0.764125594 | only in mock | only in mock |              |
| OS3569 | Annexin A3                                                   | 05+Mus musculus OX10090 GN=Anxa3   | Pe1 Sv1-1 | [ANXA3_MOUSE] | Anxa3   | 67.16185046 | 0 | 0 | 0           | 0 | 0 | 22.38728349 | 0           | 38.77591244 | 0.504985075  | 0.764125594 | only in mock | only in mock |              |
| OS3568 | Component 1 of subcomponent-binding protein, mitochondrial   | 05+Mus musculus OX10090 GN=C1obp   | Pe1 Sv1-1 | [C1OBP_MOUSE] | C1obp   | 48.64735245 | 0 | 0 | 0           | 0 | 0 | 16.21578415 | 0           | 28.08665203 | 0.504985075  | 0.764125594 | only in mock | only in mock |              |
| OS4967 | Activated CDC42 kinase 1                                     | 05+Mus musculus OX10090 GN=Trk2    | Pe1 Sv1-1 | [ACKL_MOUSE]  | Trk2    | 0           | 0 | 0 | 901.5981742 | 0 | 0 | 0           | 300.5327247 | 0           | 520.5379486  | 0.504985075 | 0.764125594  | only in mock | only in mock |
| OT0451 | Monocarboxylate transporter 2                                | 05+Mus musculus OX10090 GN=Slc16a7 | Pe1 Sv1-1 | [MOT2_MOUSE]  | Slc16a7 | 0           | 0 | 0 | 85403.62887 | 0 | 0 | 0           | 28467.87629 | 0           | 49307.80812  | 0.504985075 | 0.764125594  | only in mock | only in mock |
| OR8322 | Nidogen-2                                                    | 05+Mus musculus OX10090 GN=Nid2    | Pe1 Sv1-1 | [NID2_MOUSE]  | Nid2    | 0           | 0 | 0 | 76.3810826  | 0 | 0 | 0           | 25.46036087 | 0           | 44.0998386   | 0.504985075 | 0.764125594  | only in mock | only in mock |
| P02535 | Keratin, type I cytoskeletal 10                              | 05+Mus musculus OX10090 GN=Krt10   | Pe1 Sv1-1 | [K1C10_MOUSE] | Krt10   | 0           | 0 | 0 | 11.1163057  | 0 | 0 | 0           | 137.0387686 | 0           | 237.3581098  | 0.504985075 | 0.764125594  | only in mock | only in mock |
| P02802 | Metallothionein-1                                            | 05+Mus musculus OX10090 GN=Mt1     | Pe1 Sv1-1 | [MT1_MOUSE]   | Mt1     | 5.607042164 | 0 | 0 | 0           | 0 | 0 | 1.869014055 | 0           | 3.23727303  | 0.504985075  | 0.764125594 | only in mock | only in mock |              |
| P08775 | DNA-directed RNA polymerase II subunit RPB1                  | 05+Mus musculus OX10090 GN=Polr2a  | Pe1 Sv1-1 | [RPB1_MOUSE]  | Polr2a  | 8.849919535 | 0 | 0 | 0           | 0 | 0 | 2.949973178 | 0           | 5.109504326 | 0.504985075  | 0.764125594 |              |              |              |

|        |                                                                                                                                                  |          |             |   |              |   |   |   |              |   |             |   |             |             |              |              |
|--------|--------------------------------------------------------------------------------------------------------------------------------------------------|----------|-------------|---|--------------|---|---|---|--------------|---|-------------|---|-------------|-------------|--------------|--------------|
| Q3TUH4 | Phosphatidate cytidylyltransferase, mitochondrial OS=Mus musculus OX=10090 GN=Tamm41 PE=1 SV=2 - [TAMM41_MOUSE]                                  | Tamm41   | 0           | 0 | 342.5991111  | 0 | 0 | 0 | 114.1997037  | 0 | 197.799689  | 0 | 0.504985075 | 0.764125594 | only in mink | only in mink |
| Q3UH3A | Spatacin OS=Mus musculus OX=10090 GN=Sp11 PE=1 SV=3 - [SPCTS_MOUSE]                                                                              | Sp11     | 27.27326855 | 0 | 0            | 0 | 0 | 0 | 9.001089517  | 0 | 15.74622894 | 0 | 0.504985075 | 0.764125594 | only in mink | only in mink |
| Q3UJ06 | Ubiquitin carboxyl-terminal hydrolase 19 OS=Mus musculus OX=10090 GN=Usp19 PE=1 SV=1 - [UBP19_MOUSE]                                             | Usp19    | 16.2931468  | 0 | 0            | 0 | 0 | 0 | 5.403104892  | 0 | 9.40649615  | 0 | 0.504985075 | 0.764125594 | only in mink | only in mink |
| Q3UM45 | Protein phosphatase 1 regulatory subunit 7 OS=Mus musculus OX=10090 GN=Ppp1r7 PE=1 SV=2 - [PP1R7_MOUSE]                                          | Ppp1r7   | 23.95591148 | 0 | 0            | 0 | 0 | 0 | 7.985303826  | 0 | 13.83095194 | 0 | 0.504985075 | 0.764125594 | only in mink | only in mink |
| Q41974 | Keratin, type I cuticular Ha5 OS=Mus musculus OX=10090 GN=Krt35 PE=1 SV=1 - [KRT35_MOUSE]                                                        | Krt35    | 0           | 0 | 296.8600833  | 0 | 0 | 0 | 98.9533611   | 0 | 171.392249  | 0 | 0.504985075 | 0.764125594 | only in mink | only in mink |
| Q61112 | 45 kDa calcium-binding protein OS=Mus musculus OX=10090 GN=S68 PE=1 SV=1 - [C4045_MOUSE]                                                         | S68      | 5.107678799 | 0 | 0            | 0 | 0 | 0 | 1.17025596   | 0 | 2.94891972  | 0 | 0.504985075 | 0.764125594 | only in mink | only in mink |
| Q61765 | Keratin, type I cuticular Ha1 OS=Mus musculus OX=10090 GN=Krt31 PE=1 SV=2 - [K1H1_MOUSE]                                                         | Krt31    | 0           | 0 | 323.1033969  | 0 | 0 | 0 | 107.9034656  | 0 | 186.8942848 | 0 | 0.504985075 | 0.764125594 | only in mink | only in mink |
| Q62168 | Keratin, type I cuticular Ha2 OS=Mus musculus OX=10090 GN=Krt32 PE=1 SV=2 - [K1H2_MOUSE]                                                         | Krt32    | 0           | 0 | 428.113924   | 0 | 0 | 0 | 147.704641   | 0 | 247.2856977 | 0 | 0.504985075 | 0.764125594 | only in mink | only in mink |
| Q64520 | Guanylate kinase OS=Mus musculus OX=10090 GN=Guk1 PE=1 SV=2 - [KGUA_MOUSE]                                                                       | Guk1     | 37.09525984 | 0 | 0            | 0 | 0 | 0 | 12.36508661  | 0 | 21.41695826 | 0 | 0.504985075 | 0.764125594 | only in mink | only in mink |
| Q64707 | U2 small nuclear ribonucleoprotein auxiliary factor 35 kDa subunit-related protein 1 OS=Mus musculus OX=10090 GN=Zsr1 PE=1 SV=1 - [UZAFAL_MOUSE] | Zsr1     | 10.81148408 | 0 | 0            | 0 | 0 | 0 | 6.603828027  | 0 | 6.242013244 | 0 | 0.504985075 | 0.764125594 | only in mink | only in mink |
| Q69ZK7 | Protein FAM214A OS=Mus musculus OX=10090 GN=Fam214a PE=2 SV=3 - [F214A_MOUSE]                                                                    | Fam214a  | 0           | 0 | 655.1270643  | 0 | 0 | 0 | 218.3756881  | 0 | 378.2377869 | 0 | 0.504985075 | 0.764125594 | only in mink | only in mink |
| Q6A065 | Centrosomal protein of 170 kDa OS=Mus musculus OX=10090 GN=Cep170 PE=1 SV=2 - [CE170_MOUSE]                                                      | Cep170   | 28.16238549 | 0 | 0            | 0 | 0 | 0 | 37.81766183  | 0 | 16.25956085 | 0 | 0.504985075 | 0.764125594 | only in mink | only in mink |
| Q6IM69 | Keratin, type II cytoskeletal 72 OS=Mus musculus OX=10090 GN=Krt72 PE=3 SV=1 - [K272_MOUSE]                                                      | Krt72    | 0           | 0 | 62.989262417 | 0 | 0 | 0 | 20.99964139  | 0 | 36.36688662 | 0 | 0.504985075 | 0.764125594 | only in mink | only in mink |
| Q6KAR6 | Exocyst complex component 3 OS=Mus musculus OX=10090 GN=Exoc3 PE=1 SV=2 - [EXOC3_MOUSE]                                                          | Exoc3    | 7.393805109 | 0 | 0            | 0 | 0 | 0 | 2.464601703  | 0 | 4.26881537  | 0 | 0.504985075 | 0.764125594 | only in mink | only in mink |
| Q6NS59 | Protein FAM135A OS=Mus musculus OX=10090 GN=Fam135a PE=1 SV=2 - [F135A_MOUSE]                                                                    | Fam135a  | 875.3086656 | 0 | 0            | 0 | 0 | 0 | 291.7695552  | 0 | 505.359637  | 0 | 0.504985075 | 0.764125594 | only in mink | only in mink |
| Q6NV83 | U2 snRNP-associated SURF motif-containing protein OS=Mus musculus OX=10090 GN=U2surp PE=1 SV=3 - [SR140_MOUSE]                                   | U2surp   | 0           | 0 | 490.9955564  | 0 | 0 | 0 | 163.6665188  | 0 | 283.4787261 | 0 | 0.504985075 | 0.764125594 | only in mink | only in mink |
| Q6PA11 | Breakpoint cluster region protein OS=Mus musculus OX=10090 GN=Bcr PE=1 SV=3 - [BCR_MOUSE]                                                        | Bcr      | 3.740106726 | 0 | 0            | 0 | 0 | 0 | 1.246702242  | 0 | 2.159351625 | 0 | 0.504985075 | 0.764125594 | only in mink | only in mink |
| Q6VW19 | Ran-binding protein 10 OS=Mus musculus OX=10090 GN=Ranbp10 PE=1 SV=2 - [RBP10_MOUSE]                                                             | Ranbp10  | 58.50230427 | 0 | 0            | 0 | 0 | 0 | 19.50076809  | 0 | 37.77632112 | 0 | 0.504985075 | 0.764125594 | only in mink | only in mink |
| Q6ZN13 | Cullin-associated NEDD8-dissociated protein 2 OS=Mus musculus OX=10090 GN=Cand2 PE=1 SV=2 - [CAND2_MOUSE]                                        | Cand2    | 6.349353724 | 0 | 0            | 0 | 0 | 0 | 2.116451241  | 0 | 3.665801081 | 0 | 0.504985075 | 0.764125594 | only in mink | only in mink |
| Q80M3  | Eukaryotic translation initiation factor 4 gamma 3 OS=Mus musculus OX=10090 GN=Eif4g3 PE=1 SV=2 - [IF4G3_MOUSE]                                  | Eif4g3   | 19.8381126  | 0 | 0            | 0 | 0 | 0 | 6.612704199  | 0 | 11.45335965 | 0 | 0.504985075 | 0.764125594 | only in mink | only in mink |
| Q80Z10 | Astractin-2 OS=Mus musculus OX=10090 GN=Astr2 PE=1 SV=2 - [ASTN2_MOUSE]                                                                          | Astr2    | 0           | 0 | 4.903041383  | 0 | 0 | 0 | 1.634347128  | 0 | 2.830772263 | 0 | 0.504985075 | 0.764125594 | only in mink | only in mink |
| Q80Z24 | Fibrocystin-1 OS=Mus musculus OX=10090 GN=Pkn11 PE=1 SV=1 - [PKN11_MOUSE]                                                                        | Pkn11    | 0           | 0 | 18.94931808  | 0 | 0 | 0 | 6.316439359  | 0 | 10.94038389 | 0 | 0.504985075 | 0.764125594 | only in mink | only in mink |
| Q8B6Z7 | Keratin, type II cytoskeletal 75 OS=Mus musculus OX=10090 GN=Krt75 PE=1 SV=1 - [K275_MOUSE]                                                      | Krt75    | 0           | 0 | 231.3223861  | 0 | 0 | 0 | 77.10746202  | 0 | 133.5540419 | 0 | 0.504985075 | 0.764125594 | only in mink | only in mink |
| Q8BH49 | Alpha-(L)-fucosyltransferase 11 OS=Mus musculus OX=10090 GN=Fu11 PE=1 SV=1 - [FUT11_MOUSE]                                                       | Fut11    | 0           | 0 | 27.34498738  | 0 | 0 | 0 | 9.1144995793 | 0 | 15.78763582 | 0 | 0.504985075 | 0.764125594 | only in mink | only in mink |
| Q8B81A | Transport and Golgi organization protein 1 homolog OS=Mus musculus OX=10090 GN=Mia3 PE=1 SV=2 - [TGO1_MOUSE]                                     | Mia3     | 0           | 0 | 16.77583319  | 0 | 0 | 0 | 5.591494396  | 0 | 6.685531807 | 0 | 0.504985075 | 0.764125594 | only in mink | only in mink |
| Q8BD06 | Zinc finger and BTB domain-containing protein 46 OS=Mus musculus OX=10090 GN=Zbtb46 PE=1 SV=2 - [ZBT46_MOUSE]                                    | Zbtb46   | 9.65845458  | 0 | 0            | 0 | 0 | 0 | 3.219448819  | 0 | 5.576311281 | 0 | 0.504985075 | 0.764125594 | only in mink | only in mink |
| Q8B81A | Homeobox-containing protein 1 OS=Mus musculus OX=10090 GN=Hmbx1 PE=1 SV=1 - [HMBX1_MOUSE]                                                        | Hmbx1    | 0           | 0 | 47.52803319  | 0 | 0 | 0 | 15.84267773  | 0 | 27.44032276 | 0 | 0.504985075 | 0.764125594 | only in mink | only in mink |
| Q8BK07 | Zinc finger protein 410 OS=Mus musculus OX=10090 GN=Znf410 PE=2 SV=2 - [ZNF410_MOUSE]                                                            | Znf410   | 0           | 0 | 1134.379853  | 0 | 0 | 0 | 378.1266177  | 0 | 654.9345136 | 0 | 0.504985075 | 0.764125594 | only in mink | only in mink |
| Q8BMJ3 | Eukaryotic translation initiation factor 1A, X-chromosomal OS=Mus musculus OX=10090 GN=Eif1ax PE=2 SV=3 - [IF1AX_MOUSE]                          | Eif1ax   | 16.59843213 | 0 | 0            | 0 | 0 | 0 | 5.532810709  | 0 | 9.581109256 | 0 | 0.504985075 | 0.764125594 | only in mink | only in mink |
| Q8BSL7 | ADP-ribosylation factor 2 OS=Mus musculus OX=10090 GN=Arf2 PE=1 SV=2 - [ARF2_MOUSE]                                                              | Arf2     | 0           | 0 | 182.4596551  | 0 | 0 | 0 | 60.81988504  | 0 | 105.345131  | 0 | 0.504985075 | 0.764125594 | only in mink | only in mink |
| Q8BT11 | Cilia- and flagella-associated protein 20 OS=Mus musculus OX=10090 GN=Cfap20 PE=1 SV=1 - [CFAP20_MOUSE]                                          | Cfap20   | 12.9499195  | 0 | 0            | 0 | 0 | 0 | 4.316639851  | 0 | 7.47163954  | 0 | 0.504985075 | 0.764125594 | only in mink | only in mink |
| Q8BURA | Dedicator of cytokinesis protein 2 OS=Mus musculus OX=10090 GN=Dock1 PE=1 SV=3 - [DOCK1_MOUSE]                                                   | Dock1    | 19.93714315 | 0 | 0            | 0 | 0 | 0 | 6.645714383  | 0 | 11.51071496 | 0 | 0.504985075 | 0.764125594 | only in mink | only in mink |
| Q8BZW8 | NHL repeat-containing protein 1 OS=Mus musculus OX=10090 GN=Nhlrc2 PE=1 SV=1 - [NHLRC2_MOUSE]                                                    | Nhlrc2   | 0           | 0 | 2.77886258   | 0 | 0 | 0 | 3.909620859  | 0 | 6.771661967 | 0 | 0.504985075 | 0.764125594 | only in mink | only in mink |
| Q8C2Q3 | RNA-binding protein 14 OS=Mus musculus OX=10090 GN=Rbm14 PE=1 SV=1 - [RBM14_MOUSE]                                                               | Rbm14    | 11.13188213 | 0 | 0            | 0 | 0 | 0 | 3.710627377  | 0 | 6.426995145 | 0 | 0.504985075 | 0.764125594 | only in mink | only in mink |
| Q8C570 | mRNA export factor OS=Mus musculus OX=10090 GN=Rae1 PE=1 SV=1 - [RAE1_MOUSE]                                                                     | Rae1     | 85.32376065 | 0 | 0            | 0 | 0 | 0 | 28.44125355  | 0 | 49.26169618 | 0 | 0.504985075 | 0.764125594 | only in mink | only in mink |
| Q8CBEE | WD repeat-containing protein 37 OS=Mus musculus OX=10090 GN=Wdr37 PE=1 SV=1 - [WDR37_MOUSE]                                                      | Wdr37    | 10.8030738  | 0 | 0            | 0 | 0 | 0 | 3.36100246   | 0 | 5.821427024 | 0 | 0.504985075 | 0.764125594 | only in mink | only in mink |
| Q8CC56 | Polyadenylate-binding protein 2 OS=Mus musculus OX=10090 GN=Pabp1 PE=1 SV=3 - [PABP2_MOUSE]                                                      | Pabp1    | 55.57007264 | 0 | 0            | 0 | 0 | 0 | 18.52335755  | 0 | 32.0833968  | 0 | 0.504985075 | 0.764125594 | only in mink | only in mink |
| Q8CC79 | Apoptosis-stimulating of p53 protein 2 OS=Mus musculus OX=10090 GN=Tap53b2 PE=1 SV=3 - [ASP2_MOUSE]                                              | Tap53b2  | 20946.33193 | 0 | 0            | 0 | 0 | 0 | 6982.116045  | 0 | 1209.371038 | 0 | 0.504985075 | 0.764125594 | only in mink | only in mink |
| Q8C9Y8 | UDP-N-acetylglucosamine-6-phosphate N-acetylglucosaminyltransferase 110 kDa subunit OS=Mus musculus OX=10090 GN=Ugt PE=1 SV=2 - [DGT1_MOUSE]     | Ugt      | 20.48225423 | 0 | 0            | 0 | 0 | 0 | 6.82748076   | 0 | 11.82534634 | 0 | 0.504985075 | 0.764125594 | only in mink | only in mink |
| Q8C70  | Leucine-rich repeat-containing protein 2 OS=Mus musculus OX=10090 GN=Lrrc20 PE=1 SV=1 - [LRC20_MOUSE]                                            | Lrrc20   | 0           | 0 | 36.60330058  | 0 | 0 | 0 | 12.22011019  | 0 | 21.13292544 | 0 | 0.504985075 | 0.764125594 | only in mink | only in mink |
| Q8C1G0 | Protein argonaute-2 OS=Mus musculus OX=10090 GN=Ago2 PE=1 SV3 - [AGO2_MOUSE]                                                                     | Ago2     | 23.1334216  | 0 | 0            | 0 | 0 | 0 | 7.71140532   | 0 | 13.35680719 | 0 | 0.504985075 | 0.764125594 | only in mink | only in mink |
| Q8K003 | Translation machinery-associated protein 7 OS=Mus musculus OX=10090 GN=Tma7 PE=3 SV=1 - [TMA7_MOUSE]                                             | Tma7     | 0           | 0 | 79.73824084  | 0 | 0 | 0 | 26.57941361  | 0 | 46.03689481 | 0 | 0.504985075 | 0.764125594 | only in mink | only in mink |
| Q8K1E0 | Syntaxin-5 OS=Mus musculus OX=10090 GN=Stx5 PE=1 SV3 - [STX5_MOUSE]                                                                              | Stx5     | 26.55484202 | 0 | 0            | 0 | 0 | 0 | 8.851614007  | 0 | 15.33144519 | 0 | 0.504985075 | 0.764125594 | only in mink | only in mink |
| Q8K4G1 | Latent-transforming growth factor beta-binding protein 4 OS=Mus musculus OX=10090 GN=Ltbp4 PE=1 SV=2 - [LTBP4_MOUSE]                             | Ltbp4    | 0           | 0 | 9.416688899  | 0 | 0 | 0 | 3.1388963    | 0 | 5.436727871 | 0 | 0.504985075 | 0.764125594 | only in mink | only in mink |
| Q8K490 | pre-mRNA 3' end processing protein WRD3 OS=Mus musculus OX=10090 GN=Wdr33 PE=1 SV=1 - [WDR33_MOUSE]                                              | Wdr33    | 3.800037202 | 0 | 0            | 0 | 0 | 0 | 1.266679067  | 0 | 2.193952502 | 0 | 0.504985075 | 0.764125594 | only in mink | only in mink |
| Q8RN75 | DOB1- and CUL4-associated factor OS=Mus musculus OX=10090 GN=Dca8 PE=1 SV=1 - [DCAF8_MOUSE]                                                      | Dca8     | 13.63557314 | 0 | 0            | 0 | 0 | 0 | 4.545191046  | 0 | 7.877501822 | 0 | 0.504985075 | 0.764125594 | only in mink | only in mink |
| Q8R059 | UDP-glucosyltransferase OS=Mus musculus OX=10090 GN=Glc4 PE=1 SV=1 - [GAL_MOUSE]                                                                 | Glc4     | 11.28401093 | 0 | 0            | 0 | 0 | 0 | 3.761536364  | 0 | 6.51534636  | 0 | 0.504985075 | 0.764125594 | only in mink | only in mink |
| Q8R040 | General transcription factor IIF subunit 2 OS=Mus musculus OX=10090 GN=Gt2f2 PE=1 SV=1 - [TF2B_MOUSE]                                            | Gt2f2    | 9.519997602 | 0 | 0            | 0 | 0 | 0 | 1.973325534  | 0 | 3.417129209 | 0 | 0.504985075 | 0.764125594 | only in mink | only in mink |
| Q8R0P4 | Mth938 domain-containing protein OS=Mus musculus OX=10090 GN=Aamd PE=1 SV=1 - [AAMD_MOUSE]                                                       | Aamd     | 35.09586891 | 0 | 0            | 0 | 0 | 0 | 11.69862297  | 0 | 20.26260296 | 0 | 0.504985075 | 0.764125594 | only in mink | only in mink |
| Q8R0Z6 | Angiotensin-related protein 6 OS=Mus musculus OX=10090 GN=Angptf6 PE=2 SV=1 - [ANGL6_MOUSE]                                                      | Angptf6  | 0           | 0 | 24.33901407  | 0 | 0 | 0 | 8.11300469   | 0 | 14.05213633 | 0 | 0.504985075 | 0.764125594 | only in mink | only in mink |
| Q8RSK2 | Ubiquitin carboxyl-terminal hydrolase 33 OS=Mus musculus OX=10090 GN=Usp33 PE=1 SV=2 - [UBP33_MOUSE]                                             | Usp33    | 0           | 0 | 36.10747787  | 0 | 0 | 0 | 12.03492626  | 0 | 20.84510374 | 0 | 0.504985075 | 0.764125594 | only in mink | only in mink |
| Q8VC97 | Beta-ureidopropionase OS=Mus musculus OX=10090 GN=Upb1 PE=1 SV=1 - [BUP1_MOUSE]                                                                  | Upb1     | 0           | 0 | 42.89232343  | 0 | 0 | 0 | 14.29744114  | 0 | 24.76389448 | 0 | 0.504985075 | 0.764125594 | only in mink | only in mink |
| Q8VDM6 | Heterogeneous nuclear ribonucleoprotein U-like protein 1 OS=Mus musculus OX=10090 GN=Hnrnpul1 PE=1 SV=1 - [HNR1L_MOUSE]                          | Hnrnpul1 | 10.32018466 | 0 | 0            | 0 | 0 | 0 | 3.440051555  | 0 | 5.958361394 | 0 | 0.504985075 | 0.764125594 | only in mink | only in mink |
| Q8V1V6 | Polymerase delta-interacting protein 2 OS=Mus musculus OX=10090 GN=Polidp2 PE=1 SV=1 - [PDIP2_MOUSE]                                             | Polidp2  | 0           | 0 | 16.68478446  | 0 | 0 | 0 | 5.561594821  | 0 | 9.632964801 | 0 | 0.504985075 | 0.764125594 | only in mink | only in mink |
| Q8V1C4 | Plasmanlike vesicle-associated protein OS=Mus musculus OX=10090 GN=Pvap PE=1 SV=1 - [PLVAP_MOUSE]                                                | Pvap     | 0           | 0 |              |   |   |   |              |   |             |   |             |             |              |              |

|        |                                                                                                                         |          |              |              |             |              |              |              |              |              |              |              |             |             |             |
|--------|-------------------------------------------------------------------------------------------------------------------------|----------|--------------|--------------|-------------|--------------|--------------|--------------|--------------|--------------|--------------|--------------|-------------|-------------|-------------|
| P02301 | Histone H3.3C OS-Mus musculus OX10090 GN=H3.5 PE1 Sv=3 - [H3C_MOUSE]                                                    | H3.5     | 1658.708344  | 1306.231678  | 0           | 929.75550883 | 958.7253914  | 0            | 988.31334003 | 629.4936323  | 873.806261   | 545.3498778  | 0.506555169 | 0.764125594 | 0.656977303 |
| Q9JM58 | Cytokine receptor-like factor 1 OS-Mus musculus OX10090 GN=Cvrlf1 PE1 Sv=1 - [CRLF1_MOUSE]                              | Cvrlf1   | 0            | 15.7256364   | 16.10885405 | 0            | 12.15819651  | 12.6294175   | 0.110366902  | 8.284156006  | 9.191327353  | 7.179294857  | 0.506555169 | 0.764125594 | 0.80068848  |
| P50428 | Arsylsulfaatase A OS-Mus musculus OX10090 GN=Arsa PE1 Sv=1 - [ARSA_MOUSE]                                               | Arsa     | 26.50417859  | 0            | 32.07156098 | 24.25540013  | 22.6074962   | 0            | 19.52546652  | 15.62096491  | 17.13699394  | 13.55322127  | 0.506555169 | 0.764125594 | 0.800039138 |
| Q80WV3 | Carboxy diethylsulfotransferase 2 OS-Mus musculus OX10090 GN=Chst2 PE2 Sv=3 - [CHST2_MOUSE]                             | Chst2    | 30.3469262   | 0            | 26.42592474 | 0            | 31.932184112 | 47.86024433  | 18.92428965  | 26.53402848  | 16.50579395  | 24.29244635  | 0.506555169 | 0.764125594 | 1.4021149   |
| G32MVD | Cell adhesion molecule-related-tendon-regulated by oncogenes OS-Mus musculus OX10090 GN=Cdon PE1 Sv=2 - [CDON_MOUSE]    | Cdon     | 27.4818509   | 0            | 37.6864718  | 0            | 40.59462487  | 51.484145375 | 21.72774043  | 30.26702621  | 19.49512026  | 27.13173631  | 0.506555169 | 0.764125594 | 0.486765548 |
| Q90111 | Adaptin ear-binding coat-associated protein 2 OS-Mus musculus OX10090 GN=Ncap2 PE1 Sv=1 - [NCP2_MOUSE]                  | Ncap2    | 50.20237042  | 0            | 25.20961819 | 52.14463247  | 0            | 25.20961819  | 36.62332037  | 25.10125328  | 31.387639312 | 0            | 0.506555169 | 0.764125594 | 1.43859088  |
| Q98711 | Ras-related protein Rap-2c OS-Mus musculus OX10090 GN=Rap2c PE1 Sv=1 - [RAP2C_MOUSE]                                    | Rap2c    | 11.3297895   | 9.766230901  | 0           | 0            | 17.10332504  | 16.68034264  | 7.032008001  | 11.26089362  | 6.139871221  | 9.754502286  | 0.506555169 | 0.764125594 | 1.601376972 |
| Q98710 | Serine/threonine-protein phosphatase 4 catalytic subunit OS-Mus musculus OX10090 GN=Ppp4c PE1 Sv=2 - [PP4C_MOUSE]       | Ppp4c    | 117.8461758  | 0.465603307  | 0           | 134.9078546  | 166.4475249  | 0            | 54.90073628  | 90.45179317  | 59.33353731  | 78.33733345  | 0.506555169 | 0.764125594 | 1.64755155  |
| P53235 | Tyrosine-protein phosphatase non-receptor type 1 OS-Mus musculus OX10090 GN=Ptpn11 PE1 Sv=3 - [PTPN11_MOUSE]            | Ptpn11   | 70.43510767  | 23.47836925  | 0           | 107.5801828  | 70.46987233  | 0            | 31.30449234  | 34.95001868  | 35.86380143  | 54.64533198  | 0.506555169 | 0.764125594 | 1.895894623 |
| G5WZ45 | 40S ribosomal protein S9 OS-Mus musculus OX10090 GN=Rps9 PE1 Sv=3 - [RS9_MOUSE]                                         | Rps9     | 17.38250326  | 0            | 19.85305272 | 82.34624639  | 10.69491959  | 0            | 31.03885177  | 64.37004709  | 37.89908545  | 57.50060254  | 0.506555169 | 0.764125594 | 1.073113225 |
| P42567 | Epidermal growth factor receptor substrate 15 OS-Mus musculus OX10090 GN=Eps15 PE1 Sv=1 - [EPS15_MOUSE]                 | Eps15    | 15.12496347  | 5.639883646  | 0           | 20.85511511  | 23.81230893  | 0            | 6.927616006  | 14.88916681  | 7.653171465  | 12.978989064 | 0.506555169 | 0.764125594 | 2.149284284 |
| Q9D0X6 | Protein protease Z3 OS-Mus musculus OX10090 GN=Prsz3 PE2 Sv=2 - [PRSZ3_MOUSE]                                           | Prsz3    | 41.51868431  | 28.85428548  | 0           | 86.42141807  | 89.84673135  | 0            | 23.45765659  | 52.08938314  | 21.27893299  | 45.86565905  | 0.506555169 | 0.764125594 | 1.150934056 |
| Q9D163 | Protein delta homolog 1 OS-Mus musculus OX10090 GN=Dh1 PE1 Sv=1 - [DH1_MOUSE]                                           | Dh1      | 15.20217591  | 2890.755124  | 0           | 5482.357956  | 5335.173297  | 0            | 14.70134264  | 36.05.847375 | 14.4622599   | 3123.619327  | 0.506555169 | 0.764125594 | 1.294188848 |
| P49952 | Signal recognition particle 9 kDa protein OS-Mus musculus OX10090 GN=Spr9 PE1 Sv=2 - [SRP9_MOUSE]                       | Spr9     | 0            | 65.9384559   | 107.5311232 | 0            | 265.2621199  | 180.61617733 | 57.81898621  | 148.6262977  | 54.2225621   | 135.4936934  | 0.506555169 | 0.764125594 | 2.570540601 |
| Q4925  | Major prion protein OS-Mus musculus OX10090 GN=Prnp PE1 Sv=2 - [PRNP_MOUSE]                                             | Prnp     | 134.304904   | 58.34211226  | 0           | 0            | 331.4900861  | 266.1137333  | 64.27538719  | 19.2015131   | 67.36638186  | 175.583253   | 0.506555169 | 0.764125594 | 1.401496911 |
| Q81108 | Preferentially expressed antigen in melanoma-like protein 7 OS-Mus musculus OX10090 GN=Pramet7 PE1 Sv=1 - [PRAL7_MOUSE] | Pramet7  | 19.51729109  | 0            | 37.76275645 | 20.2156661   | 0            | 19.09334918  | 6.739888071  | 18.88494741  | 11.67382967  | 0.642384826  | 0.838405797 | 0.35296761  | 1.502725156 |
| P14105 | 60S ribosomal protein L28 OS-Mus musculus OX10090 GN=L28 PE1 Sv=2 - [RL28_MOUSE]                                        | Rpl28    | 91.76661425  | 40.91019349  | 0           | 0            | 46.66745426  | 0            | 47.2857258   | 15.5581809   | 46.74389519  | 26.94346728  | 0.642384826 | 0.838405797 | 1.388586904 |
| P57016 | Ladinin-1 OS-Mus musculus OX10090 GN=Lad1 PE1 Sv=1 - [LAD1_MOUSE]                                                       | Lad1     | 88.34367188  | 0            | 40.28057614 | 51.5924724   | 0            | 0            | 42.8744934   | 17.19754908  | 44.2893161   | 29.78702877  | 0.642384826 | 0.838405797 | 0.401113161 |
| Q99106 | Glutathione peroxidase 7 OS-Mus musculus OX10090 GN=Gpx7 PE1 Sv=1 - [GPX7_MOUSE]                                        | Gpx7     | 0            | 35.74292918  | 107.2478975 | 0            | 0            | 70.54979751  | 47.66573224  | 23.53159917  | 54.60796551  | 40.75792355  | 0.642384826 | 0.838405797 | 1.018353092 |
| Q6P919 | Anoctamin-6 OS-Mus musculus OX10090 GN=Ano6 PE1 Sv=1 - [ANO6_MOUSE]                                                     | Ano6     | 0            | 20.346328464 | 19.72302733 | 0            | 0            | 21.55949695  | 14.39543732  | 7.18649893   | 12.60630172  | 12.44738137  | 0.642384826 | 0.838405797 | 0.499220609 |
| Q80SW1 | S-adenosylhomocysteine hydrolase-like protein 1 OS-Mus musculus OX10090 GN=Ahcy1 PE1 Sv=1 - [SAHH2_MOUSE]               | Ahcy1    | 179.6579506  | 33.50287046  | 0           | 0            | 117.4837998  | 0            | 71.05360702  | 39.16126661  | 95.53422511  | 67.82930347  | 0.642384826 | 0.838405797 | 0.551125061 |
| Q52108 | Disk large homolog 4 OS-Mus musculus OX10090 GN=Dlg4 PE1 Sv=1 - [DLG4_MOUSE]                                            | Dlg4     | 143.993634   | 0            | 14.4980485  | 19.40015730  | 0            | 11.31067068  | 6.46671931   | 10.1014488   | 11.20668690  | 0.642384826  | 0.838405797 | 0.571736134 | 0.806578622 |
| Q3UL10 | Glyceral-3-phosphate dehydrogenase L-like protein OS-Mus musculus OX10090 GN=Gpd1l PE1 Sv=2 - [GPD1L_MOUSE]             | Gpd1l    | 58.81478475  | 0            | 0           | 14.79242336  | 65.50790661  | 0            | 19.60492825  | 26.74689696  | 33.95673181  | 34.35633402  | 0.642384826 | 0.838405797 | 1.365312299 |
| Q5Z0L4 | WD repeat-containing protein 43 OS-Mus musculus OX10090 GN=Wdr43 PE1 Sv=2 - [WDR43_MOUSE]                               | Wdr43    | 43.10323397  | 37.86648518  | 0           | 0            | 11.51090598  | 16.29696208  | 19.93697771  | 19.47500358  | 0.642384826  | 0.838405797  | 1.416053167 | 0.504723088 |             |
| Q9PKK2 | N-acyleuraminatase cytidyltransferase OS-Mus musculus OX10090 GN=Cmas PE1 Sv=2 - [NEUA_MOUSE]                           | Cmas     | 28.20962077  | 0            | 29.41212002 | 15.5077566   | 0            | 40.93206922  | 14.32307556  | 16.26883214  | 14.107210948 | 0.642384826  | 0.838405797 | 1.523211781 | 0.607115642 |
| Q9ERU9 | E3 SUMO-protein ligase RanBP2 OS-Mus musculus OX10090 GN=Ranbp2 PE1 Sv=2 - [RBP2_MOUSE]                                 | Ranbp2   | 0.5033406677 | 0            | 0           | 10.03528993  | 3.345096439  | 0            | 2.834468892  | 4.46012855   | 4.909444134  | 5.109179213  | 0.642384826 | 0.838405797 | 1.573532381 |
| Q920C1 | Chordin-like protein 1 OS-Mus musculus OX10090 GN=Chrd1 PE1 Sv=1 - [CRDL_MOUSE]                                         | Chrd1    | 0            | 58.48901891  | 0           | 0            | 27.184448229 | 65.30234341  | 19.49633964  | 30.82896075  | 33.76865081  | 32.80341148  | 0.642384826 | 0.838405797 | 1.581269159 |
| Q91X19 | Oxyester-binding protein-related protein 1 OS-Mus musculus OX10090 GN=Osbp1a PE1 Sv=2 - [OSB1L_MOUSE]                   | Osbp1a   | 28.71523461  | 0            | 0           | 11.28682039  | 34.9153631   | 0            | 9.571744868  | 10.4007273   | 16.57844843  | 17.81751444  | 0.642384826 | 0.838405797 | 1.608798095 |
| P93054 | Dynamin-2 OS-Mus musculus OX10090 GN=Dnm2 PE1 Sv=2 - [DYN2_MOUSE]                                                       | Dnm2     | 19.75361014  | 0            | 0           | 10.27947166  | 21.7869189   | 0            | 6.58453368   | 10.68881785  | 11.40474688  | 10.89925769  | 0.642384826 | 0.838405797 | 1.623321919 |
| G57119 | Aldehyde dehydrogenase family 16 member A1 OS-Mus musculus OX10090 GN=Alhd16a1 PE1 Sv=2 - [A16A1_MOUSE]                 | Alhd16a1 | 22.29373916  | 12.88564113  | 0           | 0            | 7.618663515  | 12.88564113  | 0            | 7.618663515  | 12.88564113  | 12.15435595  | 0.642384826 | 0.838405797 | 1.623888979 |
| P40484 | ADP-ribosylation factor 5 OS-Mus musculus OX10090 GN=Arf5 PE1 Sv=2 - [ARF5_MOUSE]                                       | Arf5     | 68.05485334  | 0            | 0           | 34.12908151  | 78.18746372  | 0            | 228.8494511  | 374.321662   | 396.093543   | 391.8895113  | 0.642384826 | 0.838405797 | 1.670349469 |
| Q9CR41 | Huntingtin-interacting protein 1 OS-Mus musculus OX10090 GN=Hypk PE1 Sv=2 - [HYPK_MOUSE]                                | Hypk     | 19.46641809  | 0            | 0           | 19.77985106  | 12.98851219  | 0            | 6.48880003   | 10.92188775  | 11.23894173  | 10.05014751  | 0.642384826 | 0.838405797 | 1.683118915 |
| P52624 | Uridine phosphorylase 1 OS-Mus musculus OX10090 GN=Upp1 PE1 Sv=2 - [UPP1_MOUSE]                                         | Upp1     | 55.35765377  | 0            | 0           | 62.30884508  | 31.40061141  | 0            | 18.45255126  | 13.236485    | 31.96075631  | 31.15474678  | 0.642384826 | 0.838405797 | 1.692800365 |
| Q922D8 | C-1-tetrahydrofolate synthase, cytoplasmic OS-Mus musculus OX10090 GN=Mthfd1 PE1 Sv=4 - [C1TF_MOUSE]                    | Mthfd1   | 16.79342764  | 0            | 0           | 18.96179477  | 40.15289822  | 0            | 11.57841588  | 19.70669856  | 20.0544058   | 20.08666113  | 0.642384826 | 0.838405797 | 1.702022073 |
| P50213 | Tubulin alpha-1B chain OS-Mus musculus OX10090 GN=Tuab1 PE1 Sv=2 - [TBA1B_MOUSE]                                        | Tuab1b   | 1669.4320    | 0            | 0           | 11.97455999  | 17.18462947  | 0            | 556.4773368  | 966.032918   | 963.8470205  | 878.9740797  | 0.642384826 | 0.838405797 | 1.73597902  |
| P70335 | Rho-associated protein kinase 1 OS-Mus musculus OX10090 GN=Rok1 PE1 Sv=1 - [ROCK1_MOUSE]                                | Rok1     | 16.06329102  | 0            | 0           | 19.70183452  | 8.261178931  | 0            | 5.354300341  | 9.321007485  | 9.274145397  | 9.893588175  | 0.642384826 | 0.838405797 | 1.740602829 |
| Q9D115 | Zinc finger protein 706 OS-Mus musculus OX10090 GN=Znf706 PE1 Sv=1 - [ZNF706_MOUSE]                                     | Znf706   | 10.34661859  | 0            | 0           | 123.9085322  | 59.83279413  | 0            | 8.347206197  | 61.09710877  | 60.24299853  | 61.97205211  | 0.642384826 | 0.838405797 | 1.756566949 |
| Q8V8H5 | EPM2A-interacting protein 1 OS-Mus musculus OX10090 GN=Epm2aip1 PE1 Sv=1 - [EPMIP_MOUSE]                                | Epm2aip1 | 4.89397241   | 0            | 0           | 6.586608946  | 72.48329348  | 0            | 14.96244137  | 16.33581858  | 25.92225044  | 40.08270121  | 0.642384826 | 0.838405797 | 1.761084693 |
| Q7MM60 | Tubulin beta-2A chain OS-Mus musculus OX10090 GN=Tuab2a PE1 Sv=1 - [TBA2A_MOUSE]                                        | Tuab2a   | 1157.243248  | 0            | 0           | 759.1012211  | 1286.734855  | 0            | 385.7471326  | 681.942261   | 668.134638   | 646.823327   | 0.642384826 | 0.838405797 | 1.767485403 |
| Q9C9C2 | Mitochondrial fission 1 protein OS-Mus musculus OX10090 GN=Fis1 PE1 Sv=1 - [FIS1_MOUSE]                                 | Fis1     | 50.02481891  | 0            | 0           | 39.90448126  | 51.09549417  | 0            | 16.67504397  | 30.3334404   | 28.88299332  | 26.58775232  | 0.642384826 | 0.838405797 | 1.819025212 |
| P14131 | 40S ribosomal protein S16 OS-Mus musculus OX10090 GN=Rps16 PE1 Sv=4 - [RS16_MOUSE]                                      | Rps16    | 144.9114943  | 0            | 0           | 116.2913706  | 151.881888   | 0            | 48.30833144  | 89.3108622   | 83.66469025  | 79.4330935   | 0.642384826 | 0.838405797 | 1.850060326 |
| P70297 | Signal transducing adapter molecule 1 OS-Mus musculus OX10090 GN=Stam PE1 Sv=3 - [STAM1_MOUSE]                          | Stam     | 21.18035107  | 0            | 0           | 16.05214833  | 23.20654575  | 0            | 7.060105025  | 13.0772686   | 12.22846601  | 11.8808288   | 0.642384826 | 0.838405797 | 1.852279366 |
| Q9D189 | 60S ribosomal protein L34 OS-Mus musculus OX10090 GN=Rpl34 PE1 Sv=2 - [RL34_MOUSE]                                      | Rpl34    | 37.19727376  | 0            | 0           | 54.55932717  | 70.46252196  | 0            | 25.73242579  | 48.34061638  | 44.56986887  | 45.55075458  | 0.642384826 | 0.838405797 | 1.878587165 |
| Q31T09 | U/LUG_L5 tri-snRNP-associated protein 2 OS-Mus musculus OX10090 GN=Usp39 PE1 Sv=2 - [SNU27_MOUSE]                       | Usp39    | 39.68158301  | 0            | 0           | 29.30182861  | 41.65963183  | 0            | 12.564861    | 23.65382     | 21.76297765  | 21.39646077  | 0.642384826 | 0.838405797 | 1.882537339 |
| Q91120 | Argininosuccinate lyase OS-Mus musculus OX10090 GN=Asl PE1 Sv=1 - [ARLY_MOUSE]                                          | Asl      | 30.96550438  | 0            | 0           | 33.90682712  | 24.45005276  | 0            | 10.32183479  | 19.45211329  | 17.87794229  | 17.49696047  | 0.642384826 | 0.838405797 | 1.884556953 |
| Q9BZ10 | General vesicular transport factor p115 OS-Mus musculus OX10090 GN=Uso1 PE1 Sv=2 - [USO1_MOUSE]                         | Uso1     | 26.60785727  | 0            | 0           | 19.68303013  | 31.93383454  | 0            | 8.869287538  | 17.20562135  | 15.36205356  | 16.11041943  | 0.642384826 | 0.838405797 | 1.939910644 |
| Q31Z53 | Glyoxylate reductase/hydroxyproton reductase OS-Mus musculus OX10090 GN=Ghrp PE1 Sv=1 - [GRHPR_MOUSE]                   | Ghrp     | 34.74322648  | 0            | 0           | 29.20389131  | 38.24015521  | 0            | 11.57107495  | 22.4813804   | 20.04160505  | 19.98579065  | 0.642384826 | 0           |             |

|        |                                                                                                             |          |               |   |   |               |              |              |              |             |             |              |             |             |             |             |
|--------|-------------------------------------------------------------------------------------------------------------|----------|---------------|---|---|---------------|--------------|--------------|--------------|-------------|-------------|--------------|-------------|-------------|-------------|-------------|
| Q9Z1R2 | Large proline-rich protein BAG6 OS=Mus musculus OX=10090 GN=Bag6 PE=1 Sv1-1 [BAG6_MOUSE]                    | Bag6     | 60 499551849  | 0 | 0 | 31 0657003556 | 23.46633989  | 87.00717416  | 20.16650616  | 21.06826429 | 34.92941328 | 11.96315305  | 0.657905019 | 0.838405797 | 1.044715635 | 0.063110730 |
| Q9C0T1 | Methylthioniose-1-phosphate isomerase OS=Mus musculus OX=10090 GN=Mri1 PE=1 Sv1-1 [MTNA_MOUSE]              | Mri1     | 62 620881763  | 0 | 0 | 20.22096681   | 39.26404909  | 9.80058395   | 20.73627254  | 22.9643671  | 35.91627761 | 15.11592003  | 0.657905019 | 0.838405797 | 1.107449117 | 0.147240414 |
| Q9O912 | Rap1 GTPase-GDP dissociation stimulator 1 OS=Mus musculus OX=10090 GN=Rap1gds1 PE=2 Sv1-1 [GDS1_MOUSE]      | Rap1gds1 | 60 1276973174 | 0 | 0 | 23.1167097173 | 34.668680122 | 14.81864162  | 20.94244725  | 24.27017134 | 36.27338268 | 9.978829736  | 0.657905019 | 0.838405797 | 1.155916166 | 0.209036769 |
| Q9B9V2 | 26S proteasome non-ATPase regulatory subunit 13 OS=Mus musculus OX=10090 GN=PsmD3 PE=1 Sv1-1 [PSD03_MOUSE]  | PsmD3    | 173 18727502  | 0 | 0 | 78.21750136   | 93.99906764  | 48.19707175  | 57.72758338  | 73.46788025 | 99.98710742 | 23.2625428   | 0.657905019 | 0.838405797 | 1.272665059 | 0.347852818 |
| Q92192 | 26S proteasome regulatory subunit 4 OS=Mus musculus OX=10090 GN=Pmc1 PE=1 Sv1-1 [PMSA_MOUSE]                | Pmc1     | 123 8282526   | 0 | 0 | 59.21887396   | 69.39938355  | 42.22676231  | 41.27803716  | 56.96767328 | 74.49612526 | 13.69677333  | 0.657905019 | 0.838405797 | 1.040807577 | 0.308087708 |
| Q92193 | 26S proteasome regulatory subunit 2 OS=Mus musculus OX=10090 GN=Pmc2 PE=1 Sv1-1 [PMS2_MOUSE]                | Pmc2     | 120 30025346  | 0 | 0 | 67.57177219   | 62.87549017  | 54.4235961   | 60.46000684  | 23.67940499 | 9.419294314 | 8.653300135  | 14.51979704 | 14.9882362  | 7.949487122 | 6.652394329 |
| Q9O529 | Calpain-2 catalytic subunit OS=Mus musculus OX=10090 GN=Capo2 PE=1 Sv1-4 [CAN2_MOUSE]                       | Capo2    | 52 98129057   | 0 | 0 | 21.27861393   | 39.80160423  | 20.36010272  | 17.66043319  | 27.14680365 | 30.58876757 | 10.96007507  | 0.657905019 | 0.838405797 | 1.537153893 | 0.620261608 |
| Q9BFC0 | Mitochondrial antiviral-signaling protein OS=Mus musculus OX=10090 GN=Mavs PE=1 Sv1-1 [MAVS_MOUSE]          | Mavs     | 115 51109178  | 0 | 0 | 13.58766384   | 8.55460934   | 3.29525021   | 5.837030594  | 9.145842499 | 10.11003355 | 4.177694789  | 0.657905019 | 0.838405797 | 1.568865165 | 0.647814458 |
| Q54775 | 26S proteasome regulatory subunit 6B OS=Mus musculus OX=10090 GN=Psmc4 PE=1 Sv2-2 [PRSB6_MOUSE]             | Psmc4    | 72 20874405   | 0 | 0 | 46.14573539   | 39.56296871  | 27.90066752  | 24.06946817  | 37.86979611 | 41.68954178 | 9.239620293  | 0.657905019 | 0.838405797 | 1.573354108 | 0.653843048 |
| Q68433 | Histone H3.1 OS=Mus musculus OX=10090 GN=H3c1 PE=1 Sv2-2 [H31_MOUSE]                                        | H3c1     | 1665 2504043  | 0 | 0 | 929.75550839  | 886.29259314 | 770.416948   | 955.08358089 | 886.2929826 | 961.4329645 | 101.3969927  | 0.657905019 | 0.838405797 | 1.596695188 | 0.576608926 |
| Q6A028 | Switch-associated protein 70 OS=Mus musculus OX=10090 GN=Swap70 PE=1 Sv2-2 [SWP70_MOUSE]                    | Swap70   | 3 766365078   | 0 | 0 | 26.262202174  | 21.18185474  | 13.58860444  | 12.58899927  | 20.32963744 | 21.80426673 | 6.359658596  | 0.657905019 | 0.838405797 | 1.614911677 | 0.691455263 |
| Q9D2N4 | Dystrobrevin alpha OS=Mus musculus OX=10090 GN=Dtna PE=1 Sv2-2 [DTNA_MOUSE]                                 | Dtna     | 3 376062421   | 0 | 0 | 37.806642121  | 32.93991345  | 2.837190821  | 20.2117755   | 3.30390953  | 3.500778657 | 4.071796178  | 0.657905019 | 0.838405797 | 1.634475266 | 0.708979585 |
| Q920X1 | Apoptosis-inducing factor 1, mitochondrial OS=Mus musculus OX=10090 GN=Aifm1 PE=1 Sv1-1 [AIFM1_MOUSE]       | Aifm1    | 55 70123857   | 0 | 0 | 41.76511109   | 44.3255473   | 6.314803797  | 18.5670992   | 30.88127291 | 32.15912508 | 21.244989    | 0.657905019 | 0.838405797 | 1.638746203 | 0.730268842 |
| P81893 | Tranngelin-3 OS=Mus musculus OX=10090 GN=Tag3 PE=1 Sv1-1 [TAG3_MOUSE]                                       | Tag3     | 45 29140006   | 0 | 0 | 46.25880398   | 205.2933841  | 14.81594748  | 65.9319779   | 310.6797437 | 287.2075873 | 140.3289094  | 0.657905019 | 0.838405797 | 1.677851322 | 0.746514081 |
| P51410 | 60S ribosomal protein L9 OS=Mus musculus OX=10090 GN=RpL9 PE=1 Sv2-2 [RL9_MOUSE]                            | Rpl9     | 44 659299696  | 0 | 0 | 49.72998967   | 27.72771287  | 25.10746218  | 18.36656505  | 25.88221728 | 25.78227292 | 1.605821393  | 0.657905019 | 0.838405797 | 1.768487557 | 0.797996338 |
| Q60631 | Growth factor receptor-bound protein 2 OS=Mus musculus OX=10090 GN=Grb2 PE=1 Sv1-1 [GRB2_MOUSE]             | Grb2     | 111 85121129  | 0 | 0 | 51.14516124   | 104.8446356  | 47.7073867   | 37.28373763  | 67.1189365  | 64.57732787 | 32.85673755  | 0.657905019 | 0.838405797 | 1.800220894 | 0.848173942 |
| Q9CWZ3 | RNA-binding protein 84 OS=Mus musculus OX=10090 GN=RbM8a PE=1 Sv1-4 [RBM8A_MOUSE]                           | RbM8a    | 88 118611679  | 0 | 0 | 63.06025849   | 67.77321246  | 38.06352771  | 29.8703893   | 54.29905889 | 51.73642505 | 14.0750789   | 0.657905019 | 0.838405797 | 1.817842823 | 0.862274236 |
| Q9QYF9 | Protein NDRG3 OS=Mus musculus OX=10090 GN=Ndrp3 PE=1 Sv1-1 [NDRG3_MOUSE]                                    | Ndrp3    | 33 552874005  | 0 | 0 | 39.75148481   | 36.33246984  | 26.02751258  | 18.42920002  | 34.07315575 | 31.92031077 | 7.14410271   | 0.657905019 | 0.838405797 | 1.846914494 | 0.885117039 |
| Q9JUI8 | 60S ribosomal protein L38 OS=Mus musculus OX=10090 GN=Rpl38 PE=1 Sv1-3 [RL38_MOUSE]                         | Rpl38    | 11 547650078  | 0 | 0 | 98.83465895   | 60.2326032   | 22.51231078  | 39.18128526  | 72.45674035 | 67.86491209 | 43.27598871  | 0.657905019 | 0.838405797 | 1.849023419 | 0.886952938 |
| PC0056 | Histone H2AZ OS=Mus musculus OX=10090 GN=H2az1 PE=1 Sv2-2 [H2AZ_MOUSE]                                      | H2az1    | 1951 40872494 | 0 | 0 | 1067.200002   | 1251.669924  | 1298.114071  | 60.49068887  | 1205.670199 | 1126.646376 | 122.1490799  | 0.657905019 | 0.838405797 | 1.855338831 | 0.890281121 |
| PZ754  | 40S ribosomal protein S6 OS=Mus musculus OX=10090 GN=RpS6 PE=1 Sv1-1 [S6_MOUSE]                             | Rps6     | 127 43574726  | 0 | 0 | 70.23514477   | 83.89183583  | 82.40531167  | 42.47907648  | 78.84490409 | 73.5291877  | 7.492534545  | 0.657905019 | 0.838405797 | 1.863025029 | 0.974669785 |
| Q91267 | SLIT1-ROBO Rho GTPase-activating protein 2 OS=Mus musculus OX=10090 GN=Sprg2 PE=1 Sv2-2 [SRGP2_MOUSE]       | Srgp2    | 79 75829373   | 0 | 0 | 59.75056881   | 37.53973128  | 55.43780702  | 26.58613091  | 50.894398   | 64.04852951 | 11.76068712  | 0.657905019 | 0.838405797 | 1.914321338 | 0.936833053 |
| P34022 | Ran-specific GTPase-activating protein OS=Mus musculus OX=10090 GN=Ranbp1 PE=1 Sv2-2 [RANG_MOUSE]           | Ranbp1   | 285 4092647   | 0 | 0 | 236.8518825   | 248.3955156  | 61.71801073  | 95.13642156  | 182.3218029 | 164.7811158 | 104.6053053  | 0.657905019 | 0.838405797 | 1.916244856 | 0.916244856 |
| OS4984 | ATPase G6T3 OS=Mus musculus OX=10090 GN=Get3 PE=1 Sv2-2 [GET3_MOUSE]                                        | Get3     | 47 1061869    | 0 | 0 | 29.21225992   | 46.00131108  | 21.68188775  | 20.12067023  | 30.19848325 | 37.19676969 | 13.69946984  | 0.657905019 | 0.838405797 | 1.923217643 | 0.943522036 |
| Q9Z1F9 | SUMO-activating enzyme subunit 2 OS=Mus musculus OX=10090 GN=Uba2 PE=1 Sv1-1 [SAE2_MOUSE]                   | Uba2     | 60 60561006   | 0 | 0 | 39.52300471   | 57.70226119  | 19.52464493  | 25.16820007  | 38.91636634 | 35.01664405 | 19.06029888  | 0.657905019 | 0.838405797 | 1.942859557 | 1.942859557 |
| Q8BK32 | 26S proteasome non-ATPase regulatory subunit 11 OS=Mus musculus OX=10090 GN=PsmD11 PE=1 Sv1-3 [PSD11_MOUSE] | PsmD11   | 90 90635615   | 0 | 0 | 75.12435126   | 69.54208869  | 32.01537084  | 30.32011884  | 58.8939683  | 52.51586632 | 23.44426156  | 0.657905019 | 0.838405797 | 1.942404555 | 0.95784371  |
| Q9JUI7 | WD40 repeat-containing protein SMU1 OS=Mus musculus OX=10090 GN=Smu1 PE=2 Sv2-2 [SMU1_MOUSE]                | Smu1     | 107 92172692  | 0 | 0 | 47.8640005    | 36.26788174  | 13.88016535  | 17.6242321   | 32.7089483  | 28.89140557 | 17.27464371  | 0.657905019 | 0.838405797 | 1.952553676 | 0.965363606 |
| A2IA0  | MAP7 domain-containing protein 1 OS=Mus musculus OX=10090 GN=Map7f1 PE=1 Sv1-1 [MAP7D1_MOUSE]               | Map7f1   | 27 91017371   | 0 | 0 | 19.18674798   | 17.36448503  | 18.02617993  | 9.30391238   | 18.19147098 | 16.11394631 | 0.92378951   | 0.657905019 | 0.838405797 | 1.95539128  | 0.967433602 |
| Q9Z199 | Hydroxymethylglutaryl-CoA synthase, cytoplasmic OS=Mus musculus OX=10090 GN=Hmgcs1 PE=1 Sv1-1 [HMCs1_MOUSE] | Hmgcs1   | 51 2959589    | 0 | 0 | 139.4415478   | 119.3894966  | 38.48209824  | 50.4196831   | 99.1048869  | 67.35076261 | 53.44920069  | 0.657905019 | 0.838405797 | 1.965109699 | 1.965109699 |
| Q35841 | Apoptosis inhibitor 5 OS=Mus musculus OX=10090 GN=Ai5 PE=1 Sv2-2 [AI5_MOUSE]                                | Ai5      | 103 4423887   | 0 | 0 | 78.38242379   | 98.6217636   | 26.6898636   | 34.48078598  | 67.91262172 | 59.7247944  | 37.235181898 | 0.657905019 | 0.838405797 | 1.969549495 | 1.978765704 |
| Q8Q0T1 | Acetyl-CoA acetyltransferase, mitochondrial OS=Mus musculus OX=10090 GN=AcAt PE=1 Sv1-1 [THIL_MOUSE]        | AcAt     | 59 65080714   | 0 | 0 | 44.86352381   | 53.9888865   | 18.95915457  | 19.88326738  | 39.27052324 | 34.4394665  | 18.17228154  | 0.657905019 | 0.838405797 | 1.975018764 | 0.981866706 |
| Q70133 | ATP-dependent RNA helicase A OS=Mus musculus OX=10090 GN=Dhx9 PE=1 Sv2-2 [DHX9_MOUSE]                       | Dhx9     | 49 22089941   | 0 | 0 | 41.10113515   | 37.9930830   | 10.39459437  | 15.0736328   | 29.82960448 | 26.10298787 | 16.90280181  | 0.657905019 | 0.838405797 | 1.97832604  | 0.984717695 |
| Q99109 | Methylosome protein 50 OS=Mus musculus OX=10090 GN=Wdr77 PE=1 Sv1-1 [MEP50_MOUSE]                           | Wdr77    | 116 19137664  | 0 | 0 | 102.2226088   | 84.7851447   | 43.66076646  | 38.73095546  | 76.88956665 | 67.08339519 | 30.06872411  | 0.657905019 | 0.838405797 | 1.985239466 | 0.98933104  |
| Q62111 | Uc snRNA-associated Sm-like protein Lsm3 OS=Mus musculus OX=10090 GN=Lsm3 PE=1 Sv2-2 [LSM3_MOUSE]           | Lsm3     | 123 11318654  | 0 | 0 | 100.2819115   | 85.38810795  | 66.52058067  | 41.64455514  | 84.0635336  | 72.13048536 | 16.91959626  | 0.657905019 | 0.838405797 | 1.013522216 | 1.013522216 |
| Q9RO59 | Four and a half LIM domains protein 2 OS=Mus musculus OX=10090 GN=Fhl3 PE=1 Sv2-2 [FHL3_MOUSE]              | Fhl3     | 89 46571610   | 0 | 0 | 76.35329372   | 67.77278804  | 10.417825259 | 29.8852036   | 61.76811145 | 51.78358608 | 18.34020315  | 0.657905019 | 0.838405797 | 2.066801193 | 1.047490594 |
| P95071 | Isostrate dehydrogenase [NADP], mitochondrial OS=Mus musculus OX=10090 GN=Idh2 PE=1 Sv1-1 [IDHP_MOUSE]      | Idh2     | 33 26116058   | 0 | 0 | 296.7301029   | 288.8080406  | 100.9727152  | 110.4201845  | 228.820502  | 191.2221928 | 110.796311   | 0.657905019 | 0.838405797 | 2.072676834 | 1.051495921 |
| Q9DC78 | Cysteine-rich protein 2 OS=Mus musculus OX=10090 GN=Crip2 PE=1 Sv1-1 [CRIP2_MOUSE]                          | Crip2    | 22 9458841    | 0 | 0 | 180.1588837   | 152.7848644  | 74.5164187   | 65.39528716  | 135.7101033 | 113.679599  | 55.02470155  | 0.657905019 | 0.838405797 | 2.075097598 | 1.057179192 |
| Q9Z198 | Putative oxidoreductase GLR1 OS=Mus musculus OX=10090 GN=Gly1 PE=1 Sv1-1 [GLR1_MOUSE]                       | Gly1     | 103 4423887   | 0 | 0 | 59.25824602   | 47.25510676  | 22.12276565  | 39.23232454  | 17.7581993  | 17.86274215 | 18.90561886  | 0.657905019 | 0.838405797 | 2.081947522 | 1.058394322 |
| PL4685 | 26S proteasome non-ATPase regulatory subunit 3 OS=Mus musculus OX=10090 GN=PsmD3 PE=1 Sv1-3 [PSMD03_MOUSE]  | PsmD3    | 77 34075884   | 0 | 0 | 77.22255041   | 51.52010078  | 37.45568083  | 50.77225255  | 55.0094478  | 44.6527077  | 20.16527073  | 0.657905019 | 0.838405797 | 2.148910226 | 1.103652630 |
| Q8O547 | Vesicle-trafficking protein SEC22b OS=Mus musculus OX=10090 GN=Sec22b PE=1 Sv1-3 [SC22B_MOUSE]              | Sec22b   | 83 12561932   | 0 | 0 | 70.18488013   | 62.94421483  | 48.26988545  | 27.0853977   | 60.4663268  | 47.99259869 | 11.16564978  | 0.657905019 | 0.838405797 | 2.182271125 | 1.125801258 |
| P85404 | Striatin-4 OS=Mus musculus OX=10090 GN=Strn4 PE=1 Sv2-2 [STRN4_MOUSE]                                       | Strn4    | 21 21933024   | 0 | 0 | 18.95182262   | 16.39599103  | 10.85337344  | 10.03100672  | 15.40063723 | 12.1782326  | 4.139994175  | 0.657905019 | 0.838405797 | 2.190320967 | 1.131412296 |
| Q91W79 | Cystathionine beta-cysteine synthase OS=Mus musculus OX=10090 GN=Cbs PE=1 Sv1-3 [CBS_MOUSE]                 | Cbs      | 91 846888642  | 0 | 0 | 77.04152206   | 81.50666455  | 43.28564323  | 30.61562881  | 67.2794298  | 53.0278246  | 20.89754153  | 0.657905019 | 0.838405797 | 2.197503223 | 1.135852821 |
| Q8IC68 | Protein arginine N-methyltransferase 5 OS=Mus musculus OX=10090 GN=Prmt5 PE=1 Sv1-3 [ANM5_MOUSE]            | Prmt5    | 57 59075735   | 0 | 0 | 48.78744075   | 50.73665413  | 24.6044432   | 13.73232545  | 41.26159108 |             |              |             |             |             |             |

|         |                                                               |                                                                  |          |              |             |             |             |             |             |              |             |              |              |             |             |              |              |
|---------|---------------------------------------------------------------|------------------------------------------------------------------|----------|--------------|-------------|-------------|-------------|-------------|-------------|--------------|-------------|--------------|--------------|-------------|-------------|--------------|--------------|
| P24399  | Zinc finger protein 239                                       | OS-Mus musculus OX10090 GN-znf239Pc2 Pe1 Sv1-3 - [ZNF239_MOUSE]  | Znf239   | 0            | 1352.45233  | 1069.23503  | 636.5346281 | 557.4000601 | 977.3001209 | 807.22119179 | 723.7451367 | 713.2791496  | 22.1231655   | 0.7         | 0.838405797 | 0.896579572  | -0.15746697  |
| P30412  | Peptidyl-prolyl cis-trans isomerase C                         | OS-Mus musculus OX10090 GN-Ppic Pe1 Sv1-1 - [PPIC_MOUSE]         | Ppic     | 121.0566171  | 86.49166187 | 109.3386867 | 116.4154979 | 81.07655172 | 88.44471791 | 105.8365552  | 95.31225585 | 17.58066243  | 18.64356693  | 0.7         | 0.838405797 | 0.902275333  | -0.14863228  |
| Q923X4  | Gliadin-2                                                     | OS-Mus musculus OX10090 GN-Gli2 Pe1 Sv1-1 - [GLR2_MOUSE]         | Gliw2    | 22.24314268  | 31.26251675 | 11.91388675 | 19.84231234 | 18.13985625 | 20.52021002 | 10.65653531  | 19.72350591 | 6.981731167  | 0.859402089  | 0.7         | 0.838405797 | 0.904559373  | -0.144712894 |
| Q3UC028 | Peroxidase homolog                                            | OS-Mus musculus OX10090 GN-Pdxn Pe1 Sv1-2 - [PDXN_MOUSE]         | Pdxn     | 65.88890004  | 51.51949451 | 56.01533666 | 68.87450365 | 47.52370847 | 49.01911614 | 57.80789093  | 52.76670792 | 7.35052368   | 14.23014274  | 0.7         | 0.838405797 | 0.919279474  | -0.13163861  |
| Q3UC029 | 26S ribosomal non-ATPase regulatory subunit 9                 | OS-Mus musculus OX10090 GN-Rps29Pm9d1 PeV1 Sv1-1 - [PSM09_MOUSE] | Pm9d1    | 94.69018273  | 76.15588881 | 65.73941859 | 88.87684916 | 70.2077576  | 57.91430007 | 79.04639671  | 72.1886745  | 14.6158627   | 15.82762482  | 0.7         | 0.838405797 | 0.913221233  | -0.13086592  |
| Q921W9  | Integrin alpha-6                                              | OS-Mus musculus OX10090 GN-Itga6 Pe1 Sv1-3 - [ITGA6_MOUSE]       | Itga6    | 29.62379399  | 40.4067487  | 65.80375257 | 10.12691096 | 19.91924221 | 10.48954289 | 27.33428415  | 24.89030025 | 4.18768119   | 11.92832832  | 0.7         | 0.838405797 | 0.918900141  | -0.129907507 |
| Q60865  | Caprin-1                                                      | OS-Mus musculus OX10090 GN-Caprin1 Pe1 Sv1-2 - [CAPR1_MOUSE]     | Caprin1  | 171.84898374 | 125.5835222 | 95.40924848 | 118.6972088 | 157.7281701 | 87.39379498 | 130.947596   | 121.273082  | 38.50148041  | 35.23786251  | 0.7         | 0.838405797 | 0.926191570  | -0.11703212  |
| Q8Q2Y9  | Splicing factor 3B subunit 4                                  | OS-Mus musculus OX10090 GN-Sf3B4 Pe1 Sv1-1 - [SF3B4_MOUSE]       | Sf3B4    | 112.7374743  | 146.2198879 | 158.426072  | 128.4484713 | 147.7023778 | 110.7113978 | 139.151811   | 128.9540283 | 23.66380636  | 18.50067246  | 0.7         | 0.838405797 | 0.926751085  | -0.10980224  |
| Q8C6PE  | Histone H2A type 1-H                                          | OS-Mus musculus OX10090 GN-H2a2c1 Pe1 Sv1-3 - [H2AH1_MOUSE]      | H2a2c1   | 265.1975163  | 138.6181591 | 120.8278997 | 145.128973  | 176.3795512 | 176.4568113 | 176.974807   | 165.038066  | 76.10622214  | 73.5034982   | 0.7         | 0.838405797 | 0.923793169  | -0.10054393  |
| Q3J1U4  | DNA damage-binding protein 1                                  | OS-Mus musculus OX10090 GN-Ddb1 Pe1 Sv1-2 - [DDB1_MOUSE]         | Ddb1     | 371.1510926  | 342.7876805 | 416.0194971 | 365.6069557 | 378.6314255 | 312.6226595 | 375.6512401  | 352.3042529 | 36.926217304 | 34.98168543  | 0.7         | 0.838405797 | 0.935239359  | -0.096407388 |
| Q60902  | Epidermal growth factor receptor substrate 15-like 1          | OS-Mus musculus OX10090 GN-Eps15l1 Pe1 Sv1-3 - [EPS15_MOUSE]     | Eps15l1  | 34.5491899   | 34.65514554 | 0           | 25.2085265  | 30.9927421  | 8.905619084 | 23.06811181  | 21.70231865 | 19.97764169  | 11.45341166  | 0.7         | 0.838405797 | 0.940793023  | -0.088050734 |
| P62270  | 40S ribosomal protein S18                                     | OS-Mus musculus OX10090 GN-Rps18 Pe1 Sv1-3 - [R18_MOUSE]         | Rps18    | 128.7064001  | 104.0494903 | 102.0497259 | 75.00237107 | 166.625671  | 74.8046385  | 111.0618532  | 105.4907619 | 14.84667789  | 52.97877565  | 0.7         | 0.838405797 | 0.945242070  | -0.08124432  |
| P79493  | Thioredoxin, mitochondrial                                    | OS-Mus musculus OX10090 GN-Trx2 Pe1 Sv1-1 - [THDM_MOUSE]         | Trx2     | 121.2708894  | 109.8574299 | 166.8192021 | 131.0607737 | 123.4475948 | 122.7135381 | 128.4573673  | 125.7142352 | 30.14971891  | 4.621330697  | 0.7         | 0.838405797 | 0.948001444  | -0.077092954 |
| P62852  | 40S ribosomal protein S25                                     | OS-Mus musculus OX10090 GN-Rps25 Pe1 Sv1-1 - [R25_MOUSE]         | Rps25    | 178.1550975  | 140.4067487 | 65.80375257 | 10.12691096 | 19.91924221 | 10.48954289 | 27.33428415  | 24.89030025 | 4.18768119   | 11.92832832  | 0.7         | 0.838405797 | 0.951672397  | -0.071463069 |
| P79783  | Lysyl oxidase homolog 1                                       | OS-Mus musculus OX10090 GN-Loxl1 Pe1 Sv1-3 - [LOXL1_MOUSE]       | Loxl1    | 0            | 35.24872604 | 26.06892080 | 31.52786210 | 21.17713706 | 26.54491266 | 24.95112085  | 24.50119093 | 6.199233809  | 0.7          | 0.838405797 | 0.95241315  | -0.07034054  |              |
| Q61245  | Collagen alpha-1(XI) chain                                    | OS-Mus musculus OX10090 GN-Col1a1 Pe1 Sv1-2 - [COLA1_MOUSE]      | Col1a1   | 188.3584062  | 185.7325177 | 180.4009522 | 137.4227979 | 157.4163642 | 203.3782471 | 84.1106254   | 179.4058031 | 4.251847609  | 36.48034743  | 0.7         | 0.838405797 | 0.971280362  | -0.042040302 |
| P43406  | Integrin alpha-V                                              | OS-Mus musculus OX10090 GN-Itgav Pe1 Sv1-2 - [ITAV_MOUSE]        | Itgav    | 43.02964148  | 16.48781252 | 42.64203999 | 24.93454275 | 34.83963471 | 40.41379353 | 34.65316466  | 23.246057   | 15.21327564  | 7.802754417  | 0.7         | 0.838405797 | 0.976298670  | -0.034605632 |
| Q8V25D  | Keratin, type II cytoskeletal 79                              | OS-Mus musculus OX10090 GN-Krt79 Pe1 Sv1-2 - [K279_MOUSE]        | Krt79    | 30.4709526   | 52.35949381 | 27.4691488  | 0           | 80.05525686 | 27.42342138 | 36.62553173  | 35.82166068 | 13.68868164  | 40.68375469  | 0.7         | 0.838405797 | 0.978174634  | -0.03186402  |
| Q81E9S  | Rho-related GTP-binding protein RhoC                          | OS-Mus musculus OX10090 GN-RhoC Pe1 Sv1-2 - [RHOC_MOUSE]         | RhoC     | 447.9321072  | 142.5024316 | 150.5646504 | 293.1785688 | 267.8276564 | 153.8475409 | 246.9997299  | 244.9512553 | 174.059229   | 78.943480071 | 0.7         | 0.838405797 | 0.991706571  | -0.021014797 |
| Q8C2T5  | Vasorin                                                       | OS-Mus musculus OX10090 GN-Vasn Pe2 Sv1-2 - [VASM_MOUSE]         | Vasn     | 77.92156258  | 58.5838889  | 77.44582436 | 87.71849594 | 36.4287884  | 88.64941438 | 71.31693643  | 70.93223292 | 11.03014162  | 29.88484449  | 0.7         | 0.838405797 | 0.994605742  | -0.007836026 |
| Q8C0N6  | Threonine-like protein 1                                      | OS-Mus musculus OX10090 GN-Thrl1 Pe1 Sv1-3 - [TXNL1_MOUSE]       | Thrl1    | 134.4782879  | 41.8139583  | 32.20127050 | 68.65314508 | 56.47938667 | 64.60931399 | 69.4778499   | 69.4848484  | 56.4796432   | 5.335373262  | 0.7         | 0.838405797 | 0.999770668  | -0.003303894 |
| P62850  | Histone H4                                                    | OS-Mus musculus OX10090 GN-H4c1 Pe1 Sv1-2 - [H4_MOUSE]           | H4c1     | 317.7365594  | 1197.34080  | 1411.517396 | 1674.458511 | 205.1958211 | 215.1480721 | 1927.504723  | 1967.380786 | 1084.409799  | 256.4494861  | 0.7         | 0.838405797 | 1.020687199  | -0.029541822 |
| Q7YMR0  | Lysosomal Pro-X carboxypeptidase                              | OS-Mus musculus OX10090 GN-Prxp Pe1 Sv1-2 - [PCP_MOUSE]          | Prxp     | 88.18759685  | 95.2726053  | 101.0199096 | 65.5808051  | 110.5452611 | 124.8313562 | 97.40752203  | 100.2024754 | 6.64551201   | 30.78227909  | 0.7         | 0.838405797 | 1.039581132  | -0.027815057 |
| Q9JXK8  | Apoptotic chromatin condensation inducer in the nucleus       | OS-Mus musculus OX10090 GN-Acin1 Pe1 Sv1-3 - [ACIN1_MOUSE]       | Acin1    | 43.13948091  | 23.44592295 | 16.22049663 | 33.9863555  | 27.61950427 | 23.55510185 | 27.16056683  | 28.38683715 | 13.93242456  | 5.257840011  | 0.7         | 0.838405797 | 1.028433074  | -0.024403714 |
| P20108  | Threonine-dependent peroxidase reductase, mitochondrial       | OS-Mus musculus OX10090 GN-Prdx3 Pe1 Sv1-1 - [PRDX3_MOUSE]       | Prdx3    | 153.6890538  | 132.6706145 | 63.50762    | 166.8398242 | 164.2584818 | 131.6984639 | 149.9557627  | 154.283956  | 15.7583352   | 19.63603298  | 0.7         | 0.838405797 | 1.028860734  | -0.040451072 |
| Q8BM72  | Heat shock 70 kDa protein 13                                  | OS-Mus musculus OX10090 GN-Hsp13 Pe1 Sv1-1 - [HSP13_MOUSE]       | Hsp13    | 22.9687634   | 30.5999939  | 58.9676043  | 32.85624777 | 37.02211372 | 40.47814346 | 36.81948669  | 37.98505165 | 17.79524311  | 5.672638095  | 0.7         | 0.838405797 | 1.03166842   | -0.04497936  |
| Q9CR51  | V-type proton ATPase subunit G                                | OS-Mus musculus OX10090 GN-Atpgv1 Pe1 Sv1-3 - [VATG1_MOUSE]      | Atpgv1   | 67.50044836  | 103.9288003 | 93.13707824 | 108.0707068 | 108.42933   | 77.22216613 | 65.5544243   | 97.9074009  | 8.34789003   | 17.14983627  | 0.7         | 0.838405797 | 1.03217448   | -0.04568737  |
| P63038  | 60 kDa heat shock protein, mitochondrial                      | OS-Mus musculus OX10090 GN-Hsp61 Pe1 Sv1-1 - [H60_MOUSE]         | Hsp61    | 179.9986232  | 204.19887   | 206.8107168 | 176.3266571 | 263.3259932 | 170.4417376 | 179.0205567  | 203.373796  | 14.78360736  | 52.02678293  | 0.7         | 0.838405797 | 1.032340897  | -0.045919452 |
| P42125  | EvoY-CoA dectase isomerase 1, mitochondrial                   | OS-Mus musculus OX10090 GN-Eco1 Pe1 Sv1-1 - [EC1_MOUSE]          | Eco1     | 126.7370973  | 71.14658586 | 78.25720984 | 83.2998689  | 120.040806  | 62.1827276  | 92.0476525   | 95.3596088  | 20.23574465  | 21.38365697  | 0.7         | 0.838405797 | 1.035888586  | -0.039862257 |
| P62075  | Mitochondrial import inner membrane translocase subunit Tim13 | OS-Mus musculus OX10090 GN-Tim13 Pe1 Sv1-1 - [TIM13_MOUSE]       | Tim13    | 67.64518028  | 41.9624895  | 42.0590562  | 63.04239486 | 52.3263216  | 43.9604269  | 50.70539813  | 53.10958672 | 14.67283723  | 9.565258391  | 0.7         | 0.838405797 | 1.047418485  | -0.066898951 |
| P84089  | Enhancer of rudimentary homolog                               | OS-Mus musculus OX10090 GN-Erh Pe1 Sv1-1 - [ERH_MOUSE]           | Erh      | 57.607925    | 45.8494824  | 60.40539203 | 62.54161063 | 67.04674169 | 60.73295095 | 65.5.1855167 | 66.54043442 | 10.2052834   | 37.112472176 | 0.7         | 0.838405797 | 1.047547314  | -0.067051566 |
| Q921E2  | RS-related protein Rab-31                                     | OS-Mus musculus OX10090 GN-Rab31 Pe1 Sv1-1 - [RAB31_MOUSE]       | Rab31    | 74.41677371  | 27.17258018 | 34.40213587 | 40.78611921 | 41.99576962 | 40.34362530 | 43.5040969   | 47.70808404 | 11.53562376  | 0.7          | 0.838405797 | 1.052459435 | -0.073764605 |              |
| Q9EPL2  | Calsyntenin-1                                                 | OS-Mus musculus OX10090 GN-Cstln1 Pe1 Sv1-1 - [CSTN1_MOUSE]      | Cstln1   | 61.64656786  | 70.4723841  | 64.2115392  | 56.77150652 | 78.6916593  | 86.58052526 | 69.5.12702   | 74.1070659  | 74.3489182   | 154.8787952  | 0.7         | 0.838405797 | 1.066938376  | -0.092334482 |
| P10810  | Monocyte differentiation antigen CD14                         | OS-Mus musculus OX10090 GN-CD14 Pe1 Sv1-1 - [CD14_MOUSE]         | CD14     | 86.8387797   | 17.12755213 | 23.87010789 | 77.28874087 | 30.93763675 | 25.99869696 | 42.61214466  | 45.44091153 | 38.9446774   | 27.80463236  | 0.7         | 0.838405797 | 1.066388277  | -0.092732826 |
| Q8C1F4  | Biotinidase                                                   | OS-Mus musculus OX10090 GN-Btd Pe1 Sv1-2 - [BTD_MOUSE]           | Btd      | 66.62130108  | 62.60323085 | 98.26752073 | 79.07351679 | 80.0497748  | 85.54313678 | 75.80400469  | 81.55549532 | 19.55334211  | 3.487722432  | 0.7         | 0.838405797 | 1.075826256  | -0.10505739  |
| P68033  | Actin, alpha cardiac muscle 1                                 | OS-Mus musculus OX10090 GN-Actc1 Pe1 Sv1-1 - [ACTC_MOUSE]        | Actc1    | 86.50120475  | 113.412386  | 38.75352802 | 70.53173141 | 65.3765598  | 42.82167419 | 51.91918768  | 59.9820369  | 27.758023    | 14.73459463  | 0.7         | 0.838405797 | 1.079233855  | -0.110395124 |
| P11438  | Lysosome-associated membrane glycoprotein 1                   | OS-Mus musculus OX10090 GN-Lamp1 Pe1 Sv1-2 - [LAMP1_MOUSE]       | Lamp1    | 187.8486491  | 0           | 190.3045788 | 136.3517249 | 157.304066  | 115.6687167 | 126.215016   | 138.7480229 | 109.347264   | 21.11790068  | 0.7         | 0.838405797 | 1.08384212   | -0.110270925 |
| Q921W9  | Ubiquitin domain-containing protein 1                         | OS-Mus musculus OX10090 GN-Ubtd1 Pe1 Sv1-2 - [UBFD1_MOUSE]       | Ubtd1    | 104.8966255  | 55.69425514 | 55.35204226 | 109.201284  | 126.3209642 | 71.98096758 | 78.17408221  | 28.50629101 | 68.17831916  | 0.7          | 0.838405797 | 1.086338224 | -0.110707481 |              |
| P16110  | Galectin-3                                                    | OS-Mus musculus OX10090 GN-Gal3 Pe1 Sv1-3 - [LEGG3_MOUSE]        | Gal3     | 217.4055159  | 167.176685  | 179.9255419 | 250.4503029 | 220.3417445 | 142.5528425 | 188.1824564  | 204.581163  | 26.13460644  | 55.45459569  | 0.7         | 0.838405797 | 1.087134625  | -0.12053607  |
| Q62283  | Tetraspanin-9                                                 | OS-Mus musculus OX10090 GN-Tspan7 Pe1 Sv1-2 - [TSN7_MOUSE]       | Tspan7   | 57.14726483  | 67.4196088  | 61.96082456 | 29.50807745 | 33.8186854  | 93.16579008 | 62.0522669   | 68.33082369 | 10.32198444  | 34.0561112   | 0.7         | 0.838405797 | 1.101182461  | -0.139055357 |
| Q70235  | Glia-derived neurotrophic factor 1                            | OS-Mus musculus OX10090 GN-Gdnf Pe1 Sv1-2 - [GDN_MOUSE]          | Serpine2 | 2619.350495  | 1693.018983 | 2416.034547 | 1866.415277 | 2988.938746 | 2562.211189 | 2242.801342  | 27.5217377  | 486.8570889  | 566.610874   | 0.7         | 0.838405797 | 1.102468166  | -0.140681366 |

|        |                                                                                                                      |          |              |               |               |              |             |               |              |             |             |             |             |             |             |             |
|--------|----------------------------------------------------------------------------------------------------------------------|----------|--------------|---------------|---------------|--------------|-------------|---------------|--------------|-------------|-------------|-------------|-------------|-------------|-------------|-------------|
| O55234 | Proteasome subunit beta type-5 OS=Mus musculus OX10090 GN=PsmB5 PE=1 Sv=1 - [PSB5_MOUSE]                             | PsmB5    | 50.222362    | 225.6113464   | 148.1280118   | 332.408254   | 334.6584804 | 196.467321    | 254.6538648  | 231.7780446 | 123.6235373 | 119.4920318 | 0.7         | O.383405797 | 1.26123375  | 0.334835663 |
| P24547 | Inosine-5'-monophosphate dehydrogenase 2 OS=Mus musculus OX10090 GN=Ihmpd2 PE=1 Sv=2 - [IMHD2_MOUSE]                 | Ihmpd2   | 1.067380716  | 40.9301471    | 37.7288554    | 88.2596761   | 91.68276616 | 54.05259127   | 61.61902401  | 78.0893231  | 39.09689188 | 20.87349894 | 0.7         | O.383405797 | 1.267292448 | 0.341749048 |
| Q61990 | Poly(rC)-binding protein 2 OS=Mus musculus OX10090 GN=Pcbp2 PE=1 Sv=1 - [PCBP2_MOUSE]                                | Pcbp2    | 939.7495433  | 266.4090847   | 290.3568108   | 722.8919962  | 783.083965  | 395.7520322   | 498.838645   | 633.9083663 | 382.027725  | 208.4325865 | 0.7         | O.383405797 | 1.270783595 | 0.345701784 |
| QJUH60 | Disco-interacting protein 2 homolog B OS=Mus musculus OX10090 GN=DiIp2b PE=1 Sv=1 - [DIIP2B_MOUSE]                   | DiIp2b   | 37.51282814  | 34.8996872    | 43.2603034    | 17.09001172  | 54.13032105 | 76.18025002   | 38.58647991  | 49.13352759 | 4.277653498 | 29.8906342  | 0.7         | O.383405797 | 1.27426037  | 0.349660094 |
| Q82163 | V-type proton ATPase subunit C1 OS=Mus musculus OX10090 GN=AtPvc1c1 PE=1 Sv=4 - [VATC1_MOUSE]                        | AtPvc1c1 | 36.4024218   | 14.4992729    | 15.40447293   | 31.7692066   | 18.47786485 | 20.24062029   | 38.2816682   | 18.44527412 | 8.47217132  | 8.62717132  | 0.7         | O.383405797 | 1.275163728 | 0.349868261 |
| P92106 | 26S proteasome regulatory subunit 8 OS=Mus musculus OX10090 GN=PmS5 PE=1 Sv=1 - [PMS5_MOUSE]                         | PmS5     | 70.21669128  | 6.475544108   | 14.61797163   | 52.71621597  | 44.1120773  | 19.2484535    | 30.43273567  | 38.5106621  | 34.691775   | 17.13348187 | 0.7         | O.383405797 | 1.27652463  | 0.350259981 |
| Q61425 | Hydroxyacyl-coenzyme A dehydrogenase, mitochondrial OS=Mus musculus OX10090 GN=Hadh PE=1 Sv=2 - [HCDH_MOUSE]         | Hadh     | 442.0343118  | 108.2028364   | 110.6192493   | 196.3703235  | 338.9427414 | 309.0142104   | 220.3854656  | 281.6424273 | 191.9564478 | 74.83951558 | 0.7         | O.383405797 | 1.277953728 | 0.35383556  |
| P16105 | Galectin-1 OS=Mus musculus OX10090 GN=Lgals1 PE=1 Sv=3 - [LEGL_MOUSE]                                                | Lgals1   | 364.8108018  | 118.2645056   | 2445.1190858  | 5137.159664  | 4934.503645 | 2857.142217   | 3368.821258  | 4309.601836 | 1976.487964 | 1261.941588 | 0.7         | O.383405797 | 1.279510075 | 0.355310171 |
| Q91906 | Guanine nucleotide exchange factor MS54 OS=Mus musculus OX10090 GN=Rabif PE=1 Sv=1 - [MSS4_MOUSE]                    | Rabif    | 75.83761518  | 40.92762141   | 32.34856133   | 73.09299352  | 74.85587883 | 43.41922899   | 49.70461144  | 63.78936711 | 23.03479777 | 17.66360419 | 0.7         | O.383405797 | 1.283369194 | 0.359936258 |
| P07310 | Creatine kinase M-type OS=Mus musculus OX10090 GN=Ckm PE=1 Sv=1 - [KCRM_MOUSE]                                       | Ckm      | 65.11772835  | 27.6527804    | 28.75256783   | 54.91190308  | 56.6234563  | 44.7539084    | 40.78553244  | 52.0763885  | 21.7365371  | 6.479642408 | 0.7         | O.383405797 | 1.290230438 | 0.367627659 |
| Q9DB98 | Actin-related protein 2/3 complex subunit 5-like protein OS=Mus musculus OX10090 GN=Arpc5l PE=1 Sv=1 - [ARPL5_MOUSE] | Arpc5l   | 334.78675637 | 74.08622717   | 0.98.7947331  | 76.56093849  | 94.3761308  | 69.65139498   | 89.91150084  | 67.18350584 | 11.77136884 | 0.7         | O.383405797 | 1.29087868  | 0.368353491 |             |
| Q3U0V1 | Far upstream element-binding protein 2 OS=Mus musculus OX10090 GN=Hkrp PE=1 Sv=2 - [FUBP2_MOUSE]                     | Hkrp     | 384.2876911  | 59.02783922   | 74.29634621   | 298.4679899  | 259.4637231 | 110.6084651   | 127.5527917  | 242.846664  | 183.5406553 | 99.13826893 | 0.7         | O.383405797 | 1.291587333 | 0.369143343 |
| P16858 | Glyceraldehyde-3-phosphate dehydrogenase OS=Mus musculus OX10090 GN=Gapdh PE=1 Sv=2 - [G3P_MOUSE]                    | Gapdh    | 1601.802906  | 382.6451738   | 492.5580433   | 1316.615015  | 1234.954171 | 652.4476034   | 625.6687071  | 1068.005789 | 574.3948628 | 352.1927011 | 0.7         | O.383405797 | 1.293044018 | 0.370459186 |
| P49442 | Inositol polyphosphate 1-phosphatase OS=Mus musculus OX10090 GN=Ipp1 PE=1 Sv=1 - [PCPI1_MOUSE]                       | Ipp1     | 59.6738475   | 24.85791046   | 33.08574753   | 1340.504186  | 1395.024445 | 805.9150559   | 902.5542302  | 1180.481129 | 51.11422714 | 325.2732121 | 0.7         | O.383405797 | 1.295874927 | 0.374051735 |
| Q8C187 | Septin-11 OS=Mus musculus OX10090 GN=Septin11 PE=1 Sv=4 - [SEP11_MOUSE]                                              | Septin11 | 391.7389738  | 154.0226311   | 158.8943956   | 359.7309354  | 387.852541  | 47.9373943    | 234.8855135  | 305.173618  | 135.8609247 | 101.6107237 | 0.7         | O.383405797 | 1.297254102 | 0.373972525 |
| Q9WV22 | Actin-related protein 2/3 complex subunit 18 OS=Mus musculus OX10090 GN=Arpc1b PE=1 Sv=4 - [ARCB1_MOUSE]             | Arpc1b   | 324.418647   | 78.16805444   | 98.15887078   | 208.1036109  | 314.2697036 | 128.2770539   | 166.9153717  | 126.8834562 | 136.7677339 | 93.30664876 | 0.7         | O.383405797 | 1.299362322 | 0.373780476 |
| Q9WU17 | ADP-ribosylation factor-like protein 3 OS=Mus musculus OX10090 GN=Arf3 PE=1 Sv=1 - [ARL3_MOUSE]                      | Arf3     | 146.7576582  | 41.28299785   | 59.9676214    | 127.715364   | 133.961308  | 116.1465899   | 82.66942581  | 107.616691  | 56.28281208 | 40.36694311 | 0.7         | O.383405797 | 1.301783193 | 0.380489193 |
| P99027 | 60S acidic ribosomal protein P2 OS=Mus musculus OX10090 GN=Rplp2 PE=1 Sv=3 - [RLA2_MOUSE]                            | Rplp2    | 299.8106928  | 68.447846     | 111.073905    | 241.484242   | 245.4758545 | 137.7960161   | 159.5276819  | 208.2519475 | 122.7051905 | 61.04925397 | 0.7         | O.383405797 | 1.305428281 | 0.384523199 |
| Q920E5 | Farnesyl pyrophosphate synthase OS=Mus musculus OX10090 GN=Fdps PE=1 Sv=1 - [FPS5_MOUSE]                             | Fdps     | 768.8108398  | 149.9074636   | 211.505532    | 633.4203214  | 553.4502169 | 289.2081743   | 376.5762969  | 492.0264145 | 304.925138  | 180.139026  | 0.7         | O.383405797 | 1.305945075 | 0.385101445 |
| Q8B6Q5 | Heterogeneous nuclear ribonucleoprotein A3 OS=Mus musculus OX10090 GN=Hnmpa3 PE=1 Sv=1 - [ROA3_MOUSE]                | Hnmpa3   | 1636.108693  | 636.4162124   | 605.3765795   | 1451.357139  | 1434.810132 | 672.8502959   | 327.8096496  | 1253.005595 | 586.3315039 | 329.3289961 | 0.7         | O.383405797 | 1.306514474 | 0.385325287 |
| P63325 | 40S ribosomal protein S10 OS=Mus musculus OX10090 GN=Rps10 PE=1 Sv=1 - [RS10_MOUSE]                                  | Rps10    | 178.8159317  | 50.2399153    | 54.13698633   | 147.2075984  | 133.2965925 | 43.73621278   | 88.3896436   | 107.6268039 | 83.5078007  | 56.13989218 | 0.7         | O.383405797 | 1.306314625 | 0.385502411 |
| Q92351 | Poly(rC)-binding protein 1 OS=Mus musculus OX10090 GN=Pcbp1 PE=1 Sv=1 - [PCBP1_MOUSE]                                | Pcbp1    | 1492.258575  | 572.7243422   | 645.674573    | 1340.504186  | 1395.024445 | 805.9150559   | 902.5542302  | 1180.481129 | 51.11422714 | 325.2732121 | 0.7         | O.383405797 | 1.306486196 | 0.385691881 |
| Q91V64 | Isochorismatase domain-containing protein 1 OS=Mus musculus OX10090 GN=Iscoc1 PE=1 Sv=1 - [ISOC1_MOUSE]              | Iscoc1   | 97.1087658   | 53.15700652   | 57.79529272   | 117.4923125  | 108.9922797 | 46.431484     | 69.35170068  | 90.1971652  | 24.15025519 | 38.80680464 | 0.7         | O.383405797 | 1.31174745  | 0.391489985 |
| P97494 | Glutamate--cysteine ligase catalytic subunit OS=Mus musculus OX10090 GN=Clec1 PE=1 Sv=4 - [GSH1_MOUSE]               | Clec1    | 89.25245335  | 58.52485781   | 54.37258524   | 50.1924683   | 47.79931249 | 45.4932038    | 85.95543128  | 100.5010794 | 33.40745548 | 0.7         | O.383405797 | 1.312432837 | 0.392243595 |             |
| P09671 | Speridox dismutase [Mn], mitochondrial OS=Mus musculus OX10090 GN=So2 PE=1 Sv=3 - [SODM_MOUSE]                       | So2      | 14.5837181   | 17.79655896   | 15.79199948   | 131.9860935  | 142.6009779 | 130.737307    | 102.7804357  | 135.1202595 | 81.72855338 | 6.506791219 | 0.7         | O.383405797 | 1.314696079 | 0.39467833  |
| Q54782 | Epididymis-specific alpha-nucleoside OS=Mus musculus OX10090 GN=Man2b2 PE=1 Sv=2 - [MA2B2_MOUSE]                     | Man2b2   | 41.59160933  | 0.19.18429844 | 23.18180709   | 30.7098707   | 26.07923391 | 20.25863593   | 26.64400936  | 20.16607337 | 3.776389109 | 0.7         | O.383405797 | 1.315192664 | 0.395274125 |             |
| Q91I6  | Aldo-keto reductase family 1 member A1 OS=Mus musculus OX10090 GN=Akr1a1 PE=1 Sv=3 - [AK1A1_MOUSE]                   | Akr1a1   | 285.1488778  | 140.241837    | 104.0072929   | 242.0967996  | 284.3385053 | 169.937566    | 176.4660048  | 232.1244205 | 95.84993915 | 57.8485751  | 0.7         | O.383405797 | 1.315405881 | 0.395508206 |
| P50065 | Phospholipid transfer protein OS=Mus musculus OX10090 GN=Ptp PE=1 Sv=1 - [PTP_MOUSE]                                 | Ptp      | 75.9339966   | 52.2935522    | 87.31576553   | 132.3248584  | 48.24752062 | 104.0788903   | 71.83457245  | 94.88363846 | 17.88677149 | 42.78611437 | 0.7         | O.383405797 | 1.320863133 | 0.401489094 |
| Q9JH3  | SH3 domain-binding glutamic acid-rich-like protein OS=Mus musculus OX10090 GN=Sh3bgr1 PE=1 Sv=1 - [SH3L1_MOUSE]      | Sh3bgr1  | 352.6159834  | 200.4153372   | 203.6961691   | 498.4883377  | 448.3555939 | 279.6234289   | 308.9091632  | 408.8224355 | 188.08205   | 114.663036  | 0.7         | O.383405797 | 1.323493005 | 0.404291705 |
| Q55137 | Acyl-coenzyme A thioesterase 1 OS=Mus musculus OX10090 GN=Acot1 PE=1 Sv=1 - [ACOT1_MOUSE]                            | Acot1    | 759.3812577  | 248.8642866   | 298.0908556   | 622.8214117  | 665.9476193 | 440.5184837   | 435.4454666  | 576.4291716 | 281.6142953 | 119.6609951 | 0.7         | O.383405797 | 1.323768912 | 0.404651295 |
| P27546 | Microtubule-associated protein 4 OS=Mus musculus OX10090 GN=Map4 PE=1 Sv=3 - [MAP4_MOUSE]                            | Map4     | 329.5258317  | 104.5392856   | 99.07354053   | 289.7319797  | 254.3203779 | 157.4085627   | 175.118389   | 233.820266  | 133.2921651 | 65.90227268 | 0.7         | O.383405797 | 1.33095274  | 0.412180225 |
| Q6N280 | Dnal homolog subfamily C member 8 OS=Mus musculus OX10090 GN=DnaC8 PE=1 Sv=2 - [DNIC8_MOUSE]                         | DnaC8    | 121.2957563  | 80.45941881   | 0.143.7480188 | 135.8648984  | 111.592008  | 97.6183171    | 130.4017621  | 107.2325141 | 16.75971762 | 0.7         | O.383405797 | 1.335830982 | 0.41773478  |             |
| Q50201 | Aspartate aminotransferase, cytoplasmic OS=Mus musculus OX10090 GN=Aot1 PE=1 Sv=3 - [AATC_MOUSE]                     | Aot1     | 425.7321315  | 10.17925883   | 132.775883    | 422.7093537  | 325.027642  | 174.2872932   | 220.25863593 | 190.3071434 | 169.7884116 | 125.1518822 | 0.7         | O.383405797 | 1.337200703 | 0.42027003  |
| P99026 | Proteasome subunit beta type-4 OS=Mus musculus OX10090 GN=PsmB4 PE=1 Sv=1 - [PSB4_MOUSE]                             | PsmB4    | 151.1793628  | 109.1085255   | 113.4730193   | 353.47888161 | 341.8803801 | 195.4190511   | 221.2536358  | 296.2626918 | 120.3905348 | 88.0994340  | 0.7         | O.383405797 | 1.342028004 | 0.424407034 |
| P70271 | PDZ and LIM domain protein 4 OS=Mus musculus OX10090 GN=Pldim4 PE=1 Sv=3 - [PDIL4_MOUSE]                             | Pldim4   | 143.2665985  | 46.21926682   | 63.1619551    | 37.185019    | 31.518184   | 71.58039265   | 84.21594014  | 110.0945135 | 51.83626974 | 36.10650269 | 0.7         | O.383405797 | 1.342911227 | 0.425363939 |
| Q9WU78 | Programmed cell death-6-interacting protein OS=Mus musculus OX10090 GN=Pdc6ip1 PE=1 Sv=3 - [PDC6I_MOUSE]             | Pdc6ip1  | 51.5824888   | 17.512065     | 168.3409836   | 109.3544851  | 288.3465109 | 267.8448744   | 164.4693741  | 221.8486235 | 114.6610801 | 97.96059237 | 0.7         | O.383405797 | 1.348874978 | 0.431756637 |
| P60824 | Cold-inducible RNA-binding protein OS=Mus musculus OX10090 GN=Cirbp PE=1 Sv=1 - [CIRBP_MOUSE]                        | Cirbp    | 36.57310678  | 34.9339335    | 54.42588852   | 147.2055572  | 151.6620792 | 128.23448195  | 48.69897537  | 65.7070479  | 11.97675734 | 33.24208355 | 0.7         | O.383405797 | 1.349118832 | 0.432017429 |
| P17225 | Polypyridimide tract-binding protein 1 OS=Mus musculus OX10090 GN=Ptpb1 PE=1 Sv=2 - [PTPB1_MOUSE]                    | Ptpb1    | 461.0991341  | 130.9754302   | 160.0621553   | 409.4959162  | 409.8916383 | 203.0817294   | 252.3255905  | 340.8109163 | 185.6102646 | 119.2772094 | 0.7         | O.383405797 | 1.350535257 | 0.433531507 |
| Q92170 | Creatine kinase U-type, mitochondrial OS=Mus musculus OX10090 GN=Ckm1 PE=1 Sv=1 - [KCRU_MOUSE]                       | Ckm1     | 390.8131401  | 107.4711106   | 86.0244472    | 308.19388    | 269.1605577 | 133.3336007   | 194.1982318  | 263.5517795 | 131.183309  | 127.5286115 | 0.7         | O.383405797 | 1.353818612 | 0.436357161 |
| P61027 | Ras-related protein Rab-10 OS=Mus musculus OX10090 GN=Rab10 PE=1 Sv=1 - [RAB10_MOUSE]                                | Rab10    | 414.8707595  | 164.8801895   | 74.53168362   | 318.3385209  | 364.8002389 | 203.7795958   | 175.2992099  | 295.5982688 | 176.2986491 | 82.87456425 | 0.7         | O.383405797 | 1.355395962 | 0.438675695 |
| Q9R1P0 | Proteasome subunit alpha type-4 OS=Mus musculus OX10090 GN=PsmA4 PE=1 Sv=1 - [PSA4_MOUSE]                            | PsmA4    | 452.5677118  | 248.7222013   | 144.4469652   | 457.6973511  | 440.9666229 | 244.9647754   | 281.9112928  | 382.5229298 | 156.718095  | 119.3003973 | 0.7         | O.383405797 | 1.356883607 | 0.440299843 |
| Q91V92 | ATP-citrate synthase OS=Mus musculus OX10090 GN=Acly PE=1 Sv=1 - [ACLY_MOUSE]                                        | Acly     | 231.8198866  | 54.74625553   | 42.119658     | 168.6098006  | 176.6204764 | 63.32802638</ |              |             |             |             |             |             |             |             |

|        |                                                                       |                                                                |         |              |             |             |             |             |              |               |             |             |              |             |             |              |              |
|--------|-----------------------------------------------------------------------|----------------------------------------------------------------|---------|--------------|-------------|-------------|-------------|-------------|--------------|---------------|-------------|-------------|--------------|-------------|-------------|--------------|--------------|
| P48428 | Tubulin-specific chaperone A                                          | OS=Mus musculus OX=10090 GN=H2ca PE=1 Sv=3 - [TBCA_MOUSE]      | Tbca    | 15.8752057   | 21.10595633 | 23.03340523 | 127.7022346 | 123.737156  | 65.81862006  | 67.0021173959 | 105.7526702 | 78.20363802 | 34.64608363  | 0.7         | 0.838405797 | 1.6537299174 | 0.653793036  |
| Q8VD75 | Huntingtin-interacting protein 1                                      | OS=Mus musculus OX=10090 GN=Ht1 PE=1 Sv=2 - [HIP1_MOUSE]       | Hip1    | 8.9807425    | 29.6620475  | 0           | 59.83128136 | 55.37548974 | 39.54699667  | 62.23625405   | 60.26766743 | 83.29077960 | 0.7          | 0.838405797 | 1.573728963 | 0.654187893  |              |
| Q9R1P4 | Proteasome subunit alpha type 1                                       | OS=Mus musculus OX=10090 GN=Psm1 PE=1 Sv=1 - [PSA1_MOUSE]      | Psm1    | 538.829028   | 175.90067   | 114.2240716 | 517.1888004 | 492.8737112 | 295.3504176  | 276.3189001   | 435.1376611 | 329.4236088 | 121.6681949  | 0.7         | 0.838405797 | 1.574780074  | 0.655141701  |
| Q62417 | Sorbin and SH3 domain-containing protein 1                            | OS=Mus musculus OX=10090 GN=Sorts1 PE=1 Sv=2 - [SR51_MOUSE]    | Sorts1  | 94.43049389  | 19.16731093 | 0           | 76.15571754 | 77.1232715  | 27.39067375  | 37.86593493   | 59.88999014 | 49.91501225 | 28.16238444  | 0.7         | 0.838405797 | 1.581630277  | 0.661412393  |
| Q9C0C3 | Glia maturation factor beta                                           | OS=Mus musculus OX=10090 GN=GmfB PE=1 Sv=3 - [GMFB_MOUSE]      | GmfB    | 97.13941904  | 0           | 55.1151167  | 86.96215173 | 79.4444208  | 74.89764991  | 90.7761769    | 80.46035291 | 48.74310628 | 6.05732216   | 0.7         | 0.838405797 | 1.584668383  | 0.664126292  |
| Q9P0Z9 | Peroxisome-5, mitochondrial                                           | OS=Mus musculus OX=10090 GN=Prdx5 PE=1 Sv=2 - [PRDX5_MOUSE]    | Prdx5   | 361.77976194 | 54.57685531 | 101.3984535 | 278.1340431 | 347.6546611 | 199.8839837  | 175.820380    | 235.2243291 | 165.511767  | 79.828808693 | 0.7         | 0.838405797 | 1.594754251  | 0.67334124   |
| Q61655 | Probable ATP-dependent RNA helicase                                   | DDX5 OS=Mus musculus OX=10090 GN=Ddx5 PE=1 Sv=2 - [DDX5_MOUSE] | Ddx5    | 189.8937474  | 44.6182572  | 48.36762087 | 195.0196621 | 259.4830736 | 0            | 94.20264433   | 151.5005959 | 82.81422411 | 135.1047144  | 0.7         | 0.838405797 | 1.606710269  | 0.684109767  |
| Q61753 | D-3-phosphoglycerate dehydrogenase                                    | OS=Mus musculus OX=10090 GN=Phgdh PE=1 Sv=3 - [SERA_MOUSE]     | Phgdh   | 298.7869785  | 60.36456767 | 258.6426472 | 273.6616707 | 129.1902021 | 0            | 163.219807    | 220.421733  | 140.8286238 | 79.42648785  | 0.7         | 0.838405797 | 1.616718176  | 0.690474476  |
| Q97447 | Four and a half LIM domain protein 1                                  | OS=Mus musculus OX=10090 GN=Fhl1 PE=1 Sv=3 - [FHL1_MOUSE]      | Fhl1    | 42.71248313  | 87.72016528 | 47.94925544 | 48.30476588 | 421.0532964 | 65.99858487  | 187.6256407   | 306.0426371 | 208.4413881 | 207.4205465  | 0.7         | 0.838405797 | 1.631134401  | 0.705875661  |
| Q6PCX7 | Repulsive guidance molecule A                                         | OS=Mus musculus OX=10090 GN=RgmA PE=1 Sv=1 - [RGMa_MOUSE]      | RgmA    | 55.46247072  | 0           | 26.56874444 | 52.3692017  | 54.96553049 | 30.19284943  | 28.01073839   | 45.84252721 | 27.73945553 | 13.61504836  | 0.7         | 0.838405797 | 1.636055454  | 0.710706565  |
| P08003 | Protein disulfide-isomerase A4                                        | OS=Mus musculus OX=10090 GN=Pdia4 PE=1 Sv=3 - [PDIA4_MOUSE]    | Pdia4   | 64.69091974  | 0           | 8.37439637  | 58.56780518 | 68.6621092  | 33.19736555  | 32.81177204   | 53.8019064  | 32.35554227 | 18.69231787  | 0.7         | 0.838405797 | 1.639928275  | 0.713662764  |
| Q9P9K3 | TRIO and F-actin-binding protein                                      | OS=Mus musculus OX=10090 GN=Triobp PE=1 Sv=3 - [TARA_MOUSE]    | Triobp  | 31.85230504  | 0           | 0.316238377 | 21.98691661 | 17.16020411 | 10.69775331  | 10.1086297    | 16.61495803 | 11.10289267 | 5.664297984  | 0.7         | 0.838405797 | 1.644741972  | 0.717861271  |
| Q92K11 | Eukaryotic translation initiation factor 3 subunit 3, X-linked        | OS=Mus musculus OX=10090 GN=Elf2s3x PE=1 Sv=2 - [IF2G_MOUSE]   | Elf2s3x | 77.40632127  | 0           | 37.07374477 | 67.97537729 | 79.9656698  | 79.9656698   | 38.16002868   | 63.11013933 | 38.71461266 | 13.94017027  | 0.7         | 0.838405797 | 1.653282404  | 0.725089559  |
| Q9JH87 | Insulin-degrading enzyme                                              | OS=Mus musculus OX=10090 GN=Idi1 PE=1 Sv=1 - [IDI_MOUSE]       | Idi1    | 376.349354   | 84.06518409 | 111.5592645 | 360.830722  | 337.6047651 | 250.4491963  | 190.6532422   | 316.294079  | 161.4089751 | 58.19454469  | 0.7         | 0.838405797 | 1.658939171  | 0.730245595  |
| Z92758 | Oxithionin-thioestertransferase, mitochondrial                        | OS=Mus musculus OX=10090 GN=Oat PE=1 Sv=1 - [OAT_MOUSE]        | Oat     | 75.50834273  | 63.20821123 | 60.02848401 | 126.3348479 | 146.7802958 | 59.54933314  | 66.24834740   | 110.886359  | 81.7542734  | 45.62387097  | 0.7         | 0.838405797 | 1.673798112  | 0.747315252  |
| Q9C0E5 | S-methyl-5'-thioadenosine phosphorylase                               | OS=Mus musculus OX=10090 GN=Mtap PE=1 Sv=1 - [MTAP_MOUSE]      | Mtap    | 99.38407667  | 0           | 17.00316344 | 83.37611275 | 95.4980873  | 10.0106938   | 38.7957467    | 66.11217258 | 53.15530254 | 41.27278231  | 0.7         | 0.838405797 | 1.70410885   | 0.76901749   |
| Q9JK81 | MYG1 exonuclease                                                      | OS=Mus musculus OX=10090 GN=Myg1 PE=1 Sv=1 - [MYG1_MOUSE]      | Myg1    | 135.2047995  | 16.6215672  | 0           | 120.743515  | 172.7071575 | 55.27210283  | 67.972471073  | 116.2409339 | 67.6054846  | 58.8486612   | 0.7         | 0.838405797 | 1.710172873  | 0.774095709  |
| P58044 | Isopentenyl-diphosphate Delta-isomerase 1                             | OS=Mus musculus OX=10090 GN=Idi1 PE=1 Sv=1 - [IDI_MOUSE]       | Idi1    | 269.688113   | 26.61358173 | 47.96593494 | 261.5044985 | 238.8491711 | 89.25123927  | 114.7558758   | 129.529542  | 134.5993274 | 93.59448953  | 0.7         | 0.838405797 | 1.712580853  | 0.776187617  |
| Q8VDM4 | 26S proteasome non-ATPase regulatory subunit 2                        | OS=Mus musculus OX=10090 GN=Psm2 PE=1 Sv=1 - [PSMD2_MOUSE]     | Psm2    | 132.7368327  | 23.88773064 | 14.42353112 | 119.213926  | 128.3185429 | 45.56092739  | 57.01589224   | 97.7029167  | 76.7456456  | 45.38411935  | 0.7         | 0.838405797 | 1.713608486  | 0.777037529  |
| Q9YQ10 | DnaI homolog subfamily A member 2                                     | OS=Mus musculus OX=10090 GN=DnaI2 PE=1 Sv=1 - [DNAI2_MOUSE]    | DnaI2   | 25.80107997  | 13.84474796 | 0           | 22.49256538 | 23.6507733  | 23.26344392  | 13.2827597    | 22.8359422  | 12.91643942 | 0.708911735  | 0.7         | 0.838405797 | 1.727577353  | 0.788750309  |
| Q8BVY1 | Espin-1                                                               | OS=Mus musculus OX=10090 GN=Epm1 PE=1 Sv=3 - [EPN1_MOUSE]      | Epm1    | 26.85026281  | 8.950047436 | 0           | 24.41925628 | 24.01719683 | 13.69476697  | 11.9343349    | 20.7104005  | 17.63744605 | 6.079044139  | 0.7         | 0.838405797 | 1.735497924  | 0.795346206  |
| P54763 | Egfrin type-8 receptor 2                                              | OS=Mus musculus OX=10090 GN=Erp2 PE=1 Sv=3 - [EPH2_MOUSE]      | Erp2    | 15.87869292  | 0           | 6.309178286 | 13.36580722 | 10.1849617  | 15.33750335  | 7.30956927    | 12.9627542  | 7.994938067 | 2.598980669  | 0.7         | 0.838405797 | 1.75281573   | 0.805963617  |
| P26883 | Peptidyl-prolyl cis-trans isomerase FKBP1A                            | OS=Mus musculus OX=10090 GN=Fkbp1a PE=1 Sv=2 - [FKBP1_MOUSE]   | Fkbp1a  | 202.765538   | 85.38933395 | 0           | 297.3260944 | 286.6203661 | 100.4187474  | 129.3819689   | 128.135356  | 156.0990062 | 110.734664   | 0.7         | 0.838405797 | 1.763217477  | 0.818254616  |
| Q65830 | 5S(3'-nucleosyl)-tetrahydrophosphatase [asymmetrical]                 | OS=Mus musculus OX=10090 GN=Nudt2 PE=1 Sv=3 - [APPA_MOUSE]     | Nudt2   | 83.12519615  | 0           | 27.02078962 | 71.26214632 | 63.6032662  | 54.23510901  | 36.44441939   | 66.3696065  | 41.9576808  | 10.5715387   | 0.7         | 0.838405797 | 1.821043769  | 0.864765602  |
| Q62315 | Small nuclear ribonucleoprotein Sm D1                                 | OS=Mus musculus OX=10090 GN=Snrdp1 PE=1 Sv=1 - [SMD1_MOUSE]    | Snrdp1  | 145.5539687  | 75.9786118  | 0           | 125.0989322 | 149.4224569 | 137.3907516  | 71.7336884    | 130.040469  | 74.77991909 | 12.1619414   | 0.7         | 0.838405797 | 1.826204114  | 0.869004434  |
| P61759 | Prefoldin subunit 3                                                   | OS=Mus musculus OX=10090 GN=Vbp1 PE=1 Sv=2 - [PFD3_MOUSE]      | Vbp1    | 91.95118949  | 0           | 30.28728058 | 90.41246096 | 79.98840934 | 53.440668719 | 40.60949002   | 74.4138255  | 46.63537658 | 19.06285919  | 0.7         | 0.838405797 | 1.837350148  | 0.877626559  |
| P46471 | 26S proteasome regulatory subunit 7                                   | OS=Mus musculus OX=10090 GN=Psmc2 PE=1 Sv=5 - [PR57_MOUSE]     | Psmc2   | 75.27840412  | 26.94055019 | 0           | 60.85306767 | 67.34440104 | 59.81059831  | 47.03298477   | 62.66938568 | 43.1626966  | 4.082173838  | 0.7         | 0.838405797 | 1.839269031  | 0.879135219  |
| P42208 | Septin-2                                                              | OS=Mus musculus OX=10090 GN=Septin2 PE=1 Sv=2 - [SEPT2_MOUSE]  | Septin2 | 65.6186486   | 77.8413676  | 82.2081357  | 432.6928381 | 567.8076393 | 496.5778973  | 70.638813     | 499.0295406 | 330.1604585 | 67.59083425  | 0.7         | 0.838405797 | 1.843816648  | 0.882746057  |
| Q88865 | 26S proteasome regulatory subunit 6A                                  | OS=Mus musculus OX=10090 GN=Psmc3 PE=1 Sv=2 - [PR56A_MOUSE]    | Psmc3   | 82.96066895  | 24.81035571 | 0           | 75.2045885  | 64.34204059 | 66.25214527  | 35.92375077   | 68.60905465 | 42.58237021 | 5.800769315  | 0.7         | 0.838405797 | 1.909764518  | 0.933947959  |
| Q9J914 | 26S proteasome non-ATPase regulatory subunit 6                        | OS=Mus musculus OX=10090 GN=Psm6 PE=1 Sv=1 - [PSMD6_MOUSE]     | Psm6    | 108.6428935  | 0           | 15.71039018 | 91.9828494  | 101.7039627 | 49.71105462  | 41.45109456   | 81.12325556 | 57.7607887  | 27.64224603  | 0.7         | 0.838405797 | 1.957303092  | 0.968867177  |
| P28650 | Nck-associated protein 1                                              | OS=Mus musculus OX=10090 GN=Nckap1 PE=1 Sv=2 - [NCKAP1_MOUSE]  | Nckap1  | 51.30716209  | 9.804177415 | 0           | 41.62372079 | 40.54064104 | 30.39112059  | 20.3704465    | 40.52149412 | 17.2367537  | 9.623001185  | 0.7         | 0.838405797 | 1.9892209767 | 0.992205767  |
| Q82466 | 40S ribosomal protein S14                                             | OS=Mus musculus OX=10090 GN=Rps14 PE=1 Sv=3 - [RS14_MOUSE]     | Rps14   | 150.1162234  | 0           | 14.02515354 | 131.1946899 | 131.4495031 | 65.67100447  | 54.17387625   | 49.0418592  | 60.9180087  | 37.94186715  | 0.7         | 0.838405797 | 1.999875166  | 0.999875166  |
| Q6R646 | Alpha-1,6-mannosylglycoprotein beta-N-acetylglucosaminyltransferase A | OS=Mus musculus OX=10090 GN=Mgat5 PE=1 Sv=1 - [MGTA5_MOUSE]    | Mgat5   | 489.5460838  | 172.3236027 | 22.98060701 | 345.3411741 | 343.9731842 | 393.8257162  | 175.0866515   | 361.0466915 | 272.3780541 | 28.39570738  | 0.7         | 0.838405797 | 2.006210288  | 1.044116324  |
| Q9P9P1 | Transmembrane glycoprotein NMB                                        | OS=Mus musculus OX=10090 GN=Gnmb PE=1 Sv=2 - [GNMB_MOUSE]      | Gnmb    | 84.82513034  | 24.11315556 | 0           | 14.58840028 | 47.39403118 | 0            | 36.4787553    | 20.66801069 | 43.64007314 | 24.27352856  | 0.824778095 | 0.977733869 | 0.566392627  | -0.82015964  |
| Q9J991 | Neuronal membrane glycoprotein MG-6                                   | OS=Mus musculus OX=10090 GN=Gm6b PE=1 Sv=2 - [GPM6B_MOUSE]     | Gm6b    | 0            | 66.21389276 | 770.9203677 | 323.232712  | 0           | 665.3513836  | 47.77464318   | 329.5280023 | 47.2886387  | 332.7203571  | 0.824778095 | 0.977733869 | 0.589755454  | -0.535841964 |
| Q9YH6  | Melanoma-associated antigen D1                                        | OS=Mus musculus OX=10090 GN=Maged1 PE=1 Sv=1 - [MAGD1_MOUSE]   | Maged1  | 55.00382456  | 0           | 26.10820666 | 33.57379926 | 0           | 24.30604441  | 27.0734374    | 19.29327123 | 27.51386616 | 17.33913677  | 0.824778095 | 0.977733869 | 0.71357865   | -0.486854649 |
| Q9EPK2 | Protein XRP2                                                          | OS=Mus musculus OX=10090 GN=Rp2 PE=1 Sv=3 - [XRP2_MOUSE]       | Rp2     | 22.29586064  | 17.49353109 | 0           | 12.29786064 | 18.2099883  | 0            | 13.2405191    | 10.38914965 | 11.70798641 | 9.372618827  | 0.824778095 | 0.977733869 | 0.734852195  | -0.394875879 |
| Q3TH73 | Protein twenty homolog 2                                              | OS=Mus musculus OX=10090 GN=Thy2 PE=1 Sv=1 - [TYH2_MOUSE]      | Thy2    | 28.73334425  | 32.51956282 | 0           | 19.16583181 | 0           | 37.88026005  | 23.53165499   | 19.0129395  | 20.5657209  | 18.9407576   | 0.824778095 | 0.977733869 | 0.808081691  | -0.303026995 |
| Q9DC51 | Guanine nucleotide-binding protein G(i) subunit alpha-3               | OS=Mus musculus OX=10090 GN=Gnai3 PE=1 Sv=3 - [GNAI3_MOUSE]    | Gnai3   | 224.1379814  | 172.328268  | 0           | 0           | 139.4556388 | 172.3016898  | 0             | 139.4556388 | 172.3016898 | 108.1728134  | 0.824778095 | 0.977733869 | 1.054817627  | 0.45184781   |
| P14873 | Microtubule-associated protein 18                                     | OS=Mus musculus OX=10090 GN=Map1b PE=1 Sv=2 - [MAP1B_MOUSE]    | Map1b   | 66.79704602  | 44.04741065 | 0           | 67.96058098 | 46.94952429 | 0            | 36.94851222   | 38.3036842  | 39.95969585 | 34.79550474  | 0.824778095 | 0.977733869 | 1.036678863  | 0.951969052  |
| Q9C0E6 | Histone chaperone ASF1A                                               | OS=Mus musculus OX=10090 GN=Asf1a PE=1 Sv=1 - [ASF1A_MOUSE]    | Asf1a   | 57.32415757  | 0           | 51.5103829  | 58.05203478 | 55.80997376 | 0            | 36.27818051   | 37.84433738 | 31.55201674 | 32.79935957  | 0.824778095 | 0.977733869 | 1.043170777  | 0.96097538   |
| P17809 | Solute carrier family 2, facilitated glucose transporter member 1     | OS=Mus musculus OX=10090 GN=Slc2a1 PE=1 Sv=4 - [GTR1_MOUSE]    | Slc2a1  | 1.582796865  | 18.25235818 | 0           | 15.8277052  |             |              |               |             |             |              |             |             |              |              |

|        |                                                    |                                              |                 |         |              |             |             |             |             |             |              |             |              |             |             |   |             |              |              |
|--------|----------------------------------------------------|----------------------------------------------|-----------------|---------|--------------|-------------|-------------|-------------|-------------|-------------|--------------|-------------|--------------|-------------|-------------|---|-------------|--------------|--------------|
| P39688 | Tyrosine-protein kinase Fyn                        | OS-Mus musculus OX10090 GN=Fyn PE1 Sv=4      | -[FYN_MOUSE]    | Fyn     | 11.18652404  | 61.03914095 | 59.09175932 | 0           | 108.3512757 | 71.242463   | 77.33204688  | 59.86457957 | 29.9224692   | 55.06443417 | 1           | 1 | 0.77412382  | -0.36936372  |              |
| Q91VM5 | RNA binding motif protein, X-linked-like 1         | OS-Mus musculus OX10090 GN=Rbmml1 PE=2 Sv=1  | -[RML1_MOUSE]   | Rbm1    | 0            | 659.5704245 | 67.2955651  | 1029.597548 | 0           | 0           | 438.953299   | 34.1991826  | 380.1481684  | 594.4384213 | 1           | 1 | 0.78185446  | -0.35028015  |              |
| Q9DB09 | Tax1-binding protein 3                             | OS-Mus musculus OX10090 GN=Tax1bp3 PE=1 Sv=1 | -[TX1B3_MOUSE]  | Tax1bp3 | 83.77635343  | 0           | 39.07881072 | 96.22483248 | 0           | 0           | 40.95127199  | 32.07494416 | 41.919958614 | 55.5543294  | 1           | 1 | 0.78323799  | -0.35247342  |              |
| Q6ZV77 | 60S ribosomal protein L35                          | OS-Mus musculus OX10090 GN=Rpl35 PE1 Sv=1    | -[RL35_MOUSE]   | Rpl35   | 106.43329114 | 64.2968546  | 58.42564657 | 78.73616134 | 100.8535581 | 0           | 75.38524103  | 59.86233982 | 27.25174162  | 53.00947309 | 1           | 1 | 0.794097611 | -0.332611739 |              |
| Q9JL00 | CD2-associated protein                             | OS-Mus musculus OX10090 GN=Cd2ap PE=1 Sv=3   | -[CD2AP_MOUSE]  | Cd2ap   | 23.86237981  | 0           | 0           | 0           | 0           | 0           | 7.954126602  | 6.420244651 | 13.7695514   | 11.12036299 | 1           | 1 | 0.807107153 | -0.29862528  |              |
| Q47879 | Insulin-like growth factor-binding protein 4       | OS-Mus musculus OX10090 GN=Igfbbp4 PE=1 Sv=2 | -[IBP4_MOUSE]   | Igfbbp4 | 110.7309921  | 0           | 257.4972567 | 45.95353673 | 165.9820668 | 333.661024  | 23.2702669   | 181.7828167 | 99.4040234   | 144.6366372 | 1           | 1 | 0.815802224 | -0.297708655 |              |
| Q88983 | Syntaxin-8                                         | OS-Mus musculus OX10090 GN=Stx8 PE=1 Sv=1    | -[STX8_MOUSE]   | Stx8    | 11.58952589  | 0           | 0           | 0           | 0           | 0           | 3.863157298  | 3.155205318 | 6.691215895  | 5.464975918 | 1           | 1 | 0.816738842 | -0.292053255 |              |
| P62500 | TSC2 domain family protein 1                       | OS-Mus musculus OX10090 GN=Tsc2cd1 PE=1 Sv=2 | -[T2D1_MOUSE]   | Tsc2cd1 | 67.9169355   | 0           | 0           | 0           | 0           | 0           | 2.263899845  | 78.73962526 | 39.21187138  | 32.45798307 | 1           | 1 | 0.827759092 | -0.272771474 |              |
| Q70340 | Neuronal pentraxin 2                               | OS-Mus musculus OX10090 GN=Nptx2 PE=2 Sv=1   | -[NPTX2_MOUSE]  | Nptx2   | 122.6241021  | 214.9149291 | 174.4332457 | 37.79496189 | 157.733466  | 228.3290262 | 170.6589256  | 141.2858181 | 46.26327877  | 96.3260155  | 1           | 1 | 0.827884141 | -0.272499212 |              |
| P62488 | DNA-directed RNA polymerase II subunit RPB7        | OS-Mus musculus OX10090 GN=Polr2g PE=1 Sv=1  | -[RPB7_MOUSE]   | Polr2g  | 0            | 0           | 0           | 47.41304474 | 0           | 0           | 39.404062809 | 15.80434825 | 13.14687603  | 27.37399414 | 1           | 1 | 0.828784111 | -0.265601515 |              |
| Q69814 | PEST proteolytic signal-containing nuclear protein | OS-Mus musculus OX10090 GN=Pemp PE1 Sv=1     | -[PCNP_MOUSE]   | Pcnp    | 52.71204333  | 0           | 0           | 0           | 44.073527   | 0           | 0            | 17.57368111 | 14.6724509   | 30.43850856 | 25.14343043 | 1 | 1           | 0.834910501  | -0.26036065  |
| Q9R174 | Septin-6                                           | OS-Mus musculus OX10090 GN=Septin6 PE1 Sv=4  | -[SEPT6_MOUSE]  | Septin6 | 21.16419106  | 0           | 0           | 0           | 17.77047456 | 0           | 0            | 70.53830354 | 59.09018585  | 12.1759256  | 102.3471568 | 1 | 1           | 0.837703414  | -0.255489009 |
| Q8RL35 | Dyslexia-associated protein KIA0319-like protein   | OS-Mus musculus OX10090 GN=Kia0319 PE1 Sv=1  | -[K319_MOUSE]   | Kia0319 | 30.99894519  | 0           | 37.95876463 | 19.96658273 | 0           | 38.04293226 | 22.9850270   | 19.336505   | 20.26282462  | 19.02929117 | 1           | 1 | 0.841232345 | -0.249422229 |              |
| P55546 | C-terminal-binding protein 2                       | OS-Mus musculus OX10090 GN=Ctbp2 PE=1 Sv=2   | -[CTBP2_MOUSE]  | Ctbp2   | 93.63997964  | 0           | 0           | 70.22403943 | 13.66850497 | 0           | 0            | 33.21329321 | 27.9648147   | 57.52711133 | 37.23074943 | 1 | 1           | 0.841957504  | -0.248106676 |
| Q8PV16 | Proliferation marker protein Ki-67                 | OS-Mus musculus OX10090 GN=Mki67 PE=1 Sv=1   | -[Ki67_MOUSE]   | Mki67   | 21.77395827  | 0           | 0           | 0           | 0           | 0           | 0            | 8.138799589 | 6.114454254  | 15.27100266 | 5.395172115 | 1 | 1           | 0.84245756   | -0.242454084 |
| P62918 | 60S ribosomal protein L8                           | OS-Mus musculus OX10090 GN=Rpl8 PE=1 Sv=2    | -[R18_MOUSE]    | Rpl8    | 29.68571054  | 18.52088749 | 16.9592852  | 22.52058668 | 33.07989466 | 0           | 0            | 21.1296108  | 18.53952538  | 6.925373742 | 16.90431494 | 1 | 1           | 0.853846019  | -0.227952174 |
| Q9WUK2 | Eukaryotic translation initiation factor 4H        | OS-Mus musculus OX10090 GN=EIF4 PE=1 Sv=3    | -[IF4H_MOUSE]   | EIF4h   | 75.76989898  | 18.56442428 | 0           | 56.54192186 | 55.86503626 | 0           | 0            | 43.80347138 | 37.468998814 | 40.12034553 | 32.45086054 | 1 | 1           | 0.855348186  | -0.225348189 |
| Q8BFW7 | Lipoma-preferred partner homolog                   | OS-Mus musculus OX10090 GN=Lpp PE=1 Sv=1     | -[LPP_MOUSE]    | Lpp     | 10.70619962  | 0           | 0           | 0           | 9.214135808 | 0           | 0            | 3.568733205 | 3.071378603  | 6.18122723  | 5.319783789 | 1 | 1           | 0.860635533  | -0.21652560  |
| Q9Z185 | Mitotic spindle assembly checkpoint protein MAD2A  | OS-Mus musculus OX10090 GN=Mad21 PE=1 Sv=2   | -[MDZ1_MOUSE]   | Mad21   | 34.29699321  | 0           | 0           | 29.60719889 | 0           | 0           | 11.42333207  | 9.86906296  | 18.90137826  | 17.09372425 | 1           | 1 | 0.866325916 | -0.21234097  |              |
| Q9Z0M5 | Lysosomal acid lipase/cholesterol ester hydrolase  | OS-Mus musculus OX10090 GN=Lipa PE=1 Sv=2    | -[LICH_MOUSE]   | Lipa    | 46.9097477   | 0           | 35.00411719 | 0           | 70.71871305 | 0           | 0            | 27.30463432 | 23.57260435  | 24.38428854 | 40.8289484  | 1 | 1           | 0.866331808  | -0.212036467 |
| P34344 | 72 kDa type IV collagenase                         | OS-Mus musculus OX10090 GN=Mmp2 PE=1 Sv=1    | -[MMP2_MOUSE]   | Mmp2    | 57.56662720  | 35.92503954 | 30.20887159 | 57.31488788 | 33.85880782 | 34.83442084 | 47.90005272  | 41.55220515 | 25.86103599  | 13.65174068 | 1           | 1 | 0.867477274 | -0.205102189 |              |
| Q9D018 | D-aminooxy-L-lysine decarboxylase 1                | OS-Mus musculus OX10090 GN=Do1 PE=1 Sv=2     | -[D1D1_MOUSE]   | Do1     | 37.08805077  | 0           | 0           | 5.22156704  | 26.59257896 | 0           | 0            | 12.3268359  | 10.72694827  | 21.4127961  | 14.2979285  | 1 | 1           | 0.867587719  | -0.204751286 |
| Q8JZM7 | Parafibromin                                       | OS-Mus musculus OX10090 GN=Cdc73 PE=1 Sv=1   | -[C7D3_MOUSE]   | Cdc73   | 102.892088   | 12.46973231 | 0           | 44.48275278 | 55.46284817 | 0           | 0            | 38.38691371 | 33.1520031   | 55.63091677 | 29.36950308 | 1 | 1           | 0.867879105  | -0.204430054 |
| Q92271 | UBX domain-containing protein 1                    | OS-Mus musculus OX10090 GN=Ubxn1 PE=1 Sv=1   | -[UBXN1_MOUSE]  | Ubxn1   | 10.52124007  | 0           | 0           | 0           | 28.27220569 | 0           | 0            | 10.8408269  | 9.424205662  | 18.77682999 | 16.32295656 | 1 | 1           | 0.869312705  | -0.200258864 |
| Q68085 | Tyrosine-protein kinase Mer                        | OS-Mus musculus OX10090 GN=MerK PE=1 Sv=1    | -[MERTK_MOUSE]  | Mertk   | 0            | 0           | 0           | 19.2632346  | 16.78481631 | 0           | 0            | 6.430277821 | 5.59493879   | 11.14068558 | 9.690718213 | 1 | 1           | 0.869489359  | -0.201162519 |
| Q9DB72 | BTB/POZ domain-containing protein 17               | OS-Mus musculus OX10090 GN=Btdb1 PE=1 Sv=1   | -[BTBDH_MOUSE]  | Btdb17  | 129.6867345  | 110.6979214 | 187.8157793 | 82.44005907 | 134.947856  | 157.397253  | 142.7334784  | 124.928356  | 40.1002706   | 38.46980864 | 1           | 1 | 0.872561559 | -0.192227287 |              |
| P47878 | Insulin-like growth factor-binding protein 3       | OS-Mus musculus OX10090 GN=Igfbb3 PE=2 Sv=2  | -[IBP3_MOUSE]   | Igfbb3  | 5148.392031  | 3557.142347 | 3277.090682 | 3709.137533 | 3667.108272 | 3130.201332 | 3994.208353  | 3502.149046 | 1009.312739  | 322.800931  | 1           | 1 | 0.87680688  | -0.189695077 |              |
| Q8BQ48 | Centrosomal protein of 295 kDa                     | OS-Mus musculus OX10090 GN=Cep295 PE=1 Sv=3  | -[CE295_MOUSE]  | Cep295  | 70.115829356 | 0           | 0           | 0           | 61.16632166 | 0           | 0            | 23.3809785  | 20.53887765  | 40.50590967 | 35.57437961 | 1 | 1           | 0.878251591  | -0.18729381  |
| Q80943 | FACT complex subunit SSRP1                         | OS-Mus musculus OX10090 GN=Strp1 PE=1 Sv=2   | -[SSRP1_MOUSE]  | Strp1   | 10.42031787  | 0           | 0           | 24.49639507 | 8.324391182 | 0           | 0            | 12.45572923 | 10.94023225  | 21.57395587 | 12.45589078 | 1 | 1           | 0.878329325  | -0.187166122 |
| P51965 | WD repeat-containing protein 5                     | OS-Mus musculus OX10090 GN=Wd5 PE=1 Sv=1     | -[WDR5_MOUSE]   | Wdr5    | 48.43241758  | 0           | 0           | 0           | 42.58866286 | 0           | 0            | 16.14004919 | 14.19262095  | 27.95385254 | 24.5889329  | 1 | 1           | 0.87956532   | -0.185137026 |
| P52762 | CR3 antigen                                        | OS-Mus musculus OX10090 GN=C81 PE=1 Sv=2     | -[CD81_MOUSE]   | C81     | 19.72478189  | 1704.52404  | 2408.09106  | 1156.698243 | 1724.816347 | 2433.042052 | 2012.4489236 | 1771.519091 | 359.8924745  | 639.452431  | 1           | 1 | 0.880280636 | -0.183963662 |              |
| P55066 | Neurocan core protein                              | OS-Mus musculus OX10090 GN=Ncan PE=1 Sv=1    | -[NCAN_MOUSE]   | Ncan    | 1869.097462  | 2845.962636 | 2698.256284 | 1226.871218 | 2289.653108 | 3022.984669 | 2471.105521  | 219.8796562 | 526.5950242  | 903.0779362 | 1           | 1 | 0.882130317 | -0.180936588 |              |
| P51125 | Calpastatin                                        | OS-Mus musculus OX10090 GN=Cast PE=1 Sv=2    | -[ICAL_MOUSE]   | Cast    | 17.86697476  | 0           | 0           | 0           | 15.76602929 | 0           | 0            | 15.9658252  | 2.55341762   | 10.13550269 | 9.10251894  | 1 | 1           | 0.882411572  | -0.180476384 |
| Q83566 | CD151 antigen                                      | OS-Mus musculus OX10090 GN=Cd151 PE=1 Sv=2   | -[CD151_MOUSE]  | Cd151   | 19.39556024  | 19.50777147 | 0           | 10.87818405 | 0           | 23.50954617 | 12.96777424  | 14.6257674  | 11.23056467  | 11.76653602 | 1           | 1 | 0.883927641 | -0.177999821 |              |
| Q8K050 | Phytanoyl-CoA hydroxylase-interacting protein      | OS-Mus musculus OX10090 GN=Phyip PE=1 Sv=1   | -[PHYIP_MOUSE]  | Phyip   | 45.9519069   | 0           | 0           | 0           | 43.41138808 | 0           | 0            | 16.18396897 | 14.471128038 | 28.03145652 | 25.06472898 | 1 | 1           | 0.891463346  | -0.176380704 |
| Q8T875 | DDI1- and CUL4-associated factor 5                 | OS-Mus musculus OX10090 GN=Dcaf5 PE=1 Sv=2   | -[DCAF5_MOUSE]  | Dcaf5   | 15.93148886  | 0           | 0           | 0           | 6.61265287  | 0           | 0            | 4.263949629 | 2.204217623  | 6.26785994  | 3.817816914 | 1 | 1           | 0.894587129  | -0.176016094 |
| Q3UH46 | Sorting nexin-27                                   | OS-Mus musculus OX10090 GN=Snx27 PE=1 Sv=2   | -[SNX27_MOUSE]  | Snx27   | 12.70878627  | 0           | 0           | 0           | 11.13059104 | 0           | 0            | 4.202595425 | 3.77868368   | 7.279108799 | 6.541719788 | 1 | 1           | 0.898697899  | -0.154091865 |
| P9R863 | Bone morphogenetic protein 1                       | OS-Mus musculus OX10090 GN=Bmp1 PE=1 Sv=2    | -[BMP1_MOUSE]   | Bmp1    | 177.9536538  | 203.5226145 | 208.973498  | 111.0086949 | 223.0786973 | 197.7536134 | 196.8167532  | 177.2803172 | 16.56164203  | 58.77321906 | 1           | 1 | 0.900738767 | -0.15081394  |              |
| Q9WBC9 | Spondin-1                                          | OS-Mus musculus OX10090 GN=Spond1 PE=1 Sv=1  | -[SPOND1_MOUSE] | Spond1  | 55.45499549  | 29.2697424  | 38.08309391 | 42.43800407 | 68.60869766 | 0           | 0            | 49.3007302  | 37.01557009  | 13.32751462 | 34.62426578 | 1 | 1           | 0.904962323  | -0.145132362 |
| P14824 | Annexin A6                                         | OS-Mus musculus OX10090 GN=Anxa6 PE=1 Sv=1   | -[ANXA6_MOUSE]  | Anxa6   | 144.8384059  | 91.5582902  | 106.2435543 | 84.54115388 | 104.7717655 | 117.057376  | 147.733884   | 103.4829356 | 27.51936984  | 16.8994533  | 1           | 1 | 0.905786072 | -0.142575739 |              |
| Q8R366 | Immunoglobulin superfamily member 8                | OS-Mus musculus OX10090 GN=Igf8 PE=1 Sv=2    | -[IGSF8_MOUSE]  | Igf8    | 14.9310113   | 136.2838136 | 175.1977761 | 39.976638   | 90.5917821  | 174.4239578 | 108.7982003  | 98.6569995  | 83.58535073  | 72.06466562 | 1           | 1 | 0.906786139 | -0.141165757 |              |
| Q9Z315 | U4/U6 L5 tri-snRNP-associated protein 1            | OS-Mus musculus OX10090 GN=Uap1 PE=1 Sv=1    | -[SNU11_MOUSE]  | Uap1    | 70.61404168  | 0           | 0           | 64.10673286 | 0           | 0           | 23.53801389  | 21.36891095 | 40.76903597  | 37.01203947 | 1           | 1 | 0.907846189 | -0.139479209 |              |
| Q9WV05 | Methylthioribulose-1-phosphate dehydratase         | OS-Mus musculus OX10090 GN=Apii PE=1 Sv=1    | -[MTNH_MOUSE]   | Apii    | 85.86787581  | 0           | 0           | 55.93142668 | 22.77885327 | 0           | 0            | 28.6262527  | 26.23669989  | 49.5784211  | 28.12560925 | 1 | 1           | 0.916409035  | -0.125751381 |
| Q88668 | Protein CREG1                                      | OS-Mus musculus OX10090 GN=Creg1 PE=1 Sv=1   | -[CREG1_MOUSE]  | Creg1   | 1            | 0           | 0           | 36.99700246 | 0           | 0           | 0            | 12.33233415 | 11.37276396  | 21.36022933 | 19.69820051 | 1 | 1           | 0.916229078  | -0.12571386  |
| Q80713 | Apoptosis regulator BAX                            | OS-Mus musculus OX10090 GN=Bax PE=1 Sv=1     | -[BAX_MOUSE]    | Bax     | 218.7915457  | 111.8082713 | 156.4302009 | 142.6883635 | 176.2423034 | 131.3853031 | 162.2433391  | 150.103746  | 53.79619939  | 23.33096638 | 1           | 1 | 0.924606743 | -0.11308821  |              |

|        |                                                                                                                          |               |             |              |              |             |              |              |              |              |              |              |             |             |             |             |             |             |
|--------|--------------------------------------------------------------------------------------------------------------------------|---------------|-------------|--------------|--------------|-------------|--------------|--------------|--------------|--------------|--------------|--------------|-------------|-------------|-------------|-------------|-------------|-------------|
| P10404 | MLV-related proviral Env polyprotein OS=Mus musculus OX=10090 PE=1 Sv=3 - [ENV1_MOUSE]                                   | Not available | 144.1890847 | 143.4514667  | 0            | 25.68182898 | 129.1593422  | 161.0888231  | 157.8297619  | 148.7739404  | 149.3593901  | 8.587939555  | 17.56941567 | 1           | 1           | 1.003964316 | 0.005665316 |             |
| QB8N16 | Neurotrophin and tolloid-like protein 2 OS=Mus musculus OX=10090 GN=Neto2 PE=1 Sv=1 - [NETO2_MOUSE]                      | Neto2         | 0           | 0            | 21.87460124  | 0           | 0            | 0            | 0            | 22.60119641  | 7.291553807  | 7.353373147  | 12.62931048 | 12.73641519 | 1           | 1           | 1.004880702 | 0.012183477 |
| QX1V33 | Brain acid soluble protein 1 OS=Mus musculus OX=10090 GN=Basp1 PE=1 Sv=3 - [BASP1_MOUSE]                                 | Basp1         | 693.5929892 | 690.14227265 | 608.7621185  | 698.0761762 | 648.1652916  | 669.5584651  | 665.4929781  | 671.933338   | 665.4929781  | 49.13012694  | 25.0400445  | 1           | 1           | 1.003697578 | 0.013894668 |             |
| Q594F3 | Rho GTPase-activating protein 1 OS=Mus musculus OX=10090 GN=Arhgap1 PE=1 Sv=1 - [RHG01_MOUSE]                            | Arhgap1       | 105.429178  | 123.4008006  | 82.1881672   | 78.73406694 | 96.26147625  | 48.10406261  | 71.33480881  | 74.3665327   | 37.30657955  | 24.37397427  | 1           | 1           | 1.013197198 | 0.020171119 |             |             |
| Q594F7 | Tight junction protein 20-1 OS=Mus musculus OX=10090 GN=Tjp2 PE=1 Sv=2 - [TJ01_MOUSE]                                    | Tjp1          | 83.4550378  | 77.13312938  | 25.01381402  | 63.04274964 | 46.60120079  | 18.56887017  | 41.93536903  | 42.53760687  | 36.16668626  | 22.4383344   | 1           | 1           | 1.012635719 | 0.026757319 |             |             |
| PK2313 | USP mRNA-associated Sm-like protein Lsm6 OS=Mus musculus OX=10090 GN=Lsm6 PE=1 Sv=1 - [LSM6_MOUSE]                       | Lsm6          | 62.76898795 | 0            | 0            | 63.76888928 | 0            | 0            | 0            | 20.9249998   | 18.86747091  | 10.83010556  | 2.797957379 | 1           | 1           | 1.015368612 | 0.023874421 |             |
| QJ9H83 | Metalloproteinase inhibitor 4 OS=Mus musculus OX=10090 GN=Timpp PE=2 Sv=1 - [TIMP4_MOUSE]                                | Timpp4        | 31.8877117  | 27.9993617   | 32.97745164  | 29.755393   | 26.48764741  | 38.15641677  | 30.95484348  | 31.46585873  | 2.616875001  | 6.018627963  | 1           | 1           | 1.016502982 | 0.022623389 |             |             |
| QO2248 | Catenin beta-1 OS=Mus musculus OX=10090 GN=Ctnnb1 PE=1 Sv=1 - [CTNNB1_MOUSE]                                             | Ctnnb1        | 75.88904028 | 76.86543496  | 69.18519872  | 68.97943155 | 110.1459094  | 77.19167327  | 67.97979132  | 85.40565792  | 13.17729009  | 21.82505573  | 1           | 1           | 1.016977476 | 0.024287579 |             |             |
| Q61207 | Prospanin OS=Mus musculus OX=10090 GN=Pasp PE=1 Sv=2 - [SAP_MOUSE]                                                       | Pasp          | 107.7350883 | 92.30390967  | 101.7165874  | 96.27007656 | 106.8070964  | 109.118707   | 102.825948   | 100.6091945  | 85.76052624  | 68.45300099  | 1           | 1           | 1.017352977 | 0.024820319 |             |             |
| QJ1VU0 | Protein FAM3C OS=Mus musculus OX=10090 GN=Fam3c PE=1 Sv=1 - [FAM3C_MOUSE]                                                | Fam3c         | 63.2865577  | 66.05848329  | 92.47547442  | 57.70966732 | 84.75210231  | 84.81209205  | 73.93920449  | 60.7593145   | 16.1127246   | 15.63030336  | 1           | 1           | 1.024597042 | 0.030557843 |             |             |
| QD9E70 | EF-hand domain-containing protein D2 OS=Mus musculus OX=10090 GN=Ehfd2 PE=1 Sv=1 - [EHFD2_MOUSE]                         | Ehfd2         | 56.21173474 | 70.23566653  | 64.81714825  | 68.44099186 | 57.8324231   | 67.89127314  | 63.78998394  | 65.40183238  | 7.015886663  | 4.795782102  | 1           | 1           | 1.025268049 | 0.036001141 |             |             |
| FA7877 | Insuln-like growth factor-binding protein 2 OS=Mus musculus OX=10090 GN=Igf2bp2 PE=2 Sv=2 - [IBP2_MOUSE]                 | Igf2bp2       | 7001.373701 | 9400.708791  | 9814.343436  | 6244.610976 | 9124.397384  | 11528.05516  | 78.9282986   | 89.5687839   | 1538.60341   | 2645.295285  | 1           | 1           | 1.025984929 | 0.036957971 |             |             |
| Q92311 | Serotrannin OS=Mus musculus OX=10090 GN=Trf PE=1 Sv=1 - [TRF_MOUSE]                                                      | Trf           | 27.862.0240 | 48.645.59814 | 71.493.15582 | 48.849.9492 | 47.479.93156 | 35.938.47234 | 49.146.92633 | 50.458.94777 | 22.039.84439 | 400.397.9723 | 1           | 1           | 1.02669595  | 0.038088929 |             |             |
| Q81244 | Delta and Notch-like epidermal growth factor-related receptor OS=Mus musculus OX=10090 GN=Dnr PE=1 Sv=1 - [DNR_MOUSE]    | Dnr           | 75.76797198 | 18.21346793  | 29.23386028  | 56.87472479 | 21.14796374  | 19.30972421  | 18.34100426  | 18.86747091  | 10.83010556  | 2.797957379  | 1           | 1           | 1.028644103 | 0.040740721 |             |             |
| Q97121 | Dipeptidyl peptidase 1 OS=Mus musculus OX=10090 GN=Dpp1 PE=1 Sv=1 - [CATC_MOUSE]                                         | Catc          | 130.2133867 | 134.1724433  | 121.7294809  | 76.05175685 | 125.9298634  | 195.7358873  | 128.705037   | 125.9298634  | 63.95709561  | 60.13774818  | 1           | 1           | 1.0301367   | 0.042489802 |             |             |
| Q92316 | Multiple inositol polyphosphate phosphatase 1 OS=Mus musculus OX=10090 GN=Minnp1 PE=1 Sv=3 - [MINP1_MOUSE]               | Minnp1        | 42.09099112 | 79.71800835  | 95.51318229  | 51.91014294 | 86.14405389  | 86.56002925  | 72.4400126   | 74.87142969  | 27.4445643   | 19.88614566  | 1           | 1           | 1.033554734 | 0.047612901 |             |             |
| Q9N817 | Acetyl-coenzyme A synthetase 2-like, mitochondrial OS=Mus musculus OX=10090 GN=Acsc1 PE=1 Sv=1 - [ACSC1_MOUSE]           | Acsc1         | 15.45957563 | 0            | 0            | 0.034882843 | 2.06057806   | 0            | 0            | 15.21991921  | 15.74816688  | 26.36167336  | 21.34232738 | 1           | 1           | 1.034707653 | 0.049232205 |             |
| Q00993 | Tyrosine-protein kinase receptor UPO OS=Mus musculus OX=10090 GN=Uax PE=1 Sv=2 - [UFO_MOUSE]                             | Uax           | 54.92788543 | 60.12036944  | 38.21180515  | 56.11092986 | 51.82065254  | 50.8526871   | 52.79390848  | 54.72801794  | 13.58016316  | 5.894087452  | 1           | 1           | 1.037313301 | 0.0528517   |             |             |
| Q08998 | DNA-directed RNA polymerases I, II, and III subunit RPABC1 OS=Mus musculus OX=10090 GN=Polr2e PE=1 Sv=1 - [RPAA1_MOUSE]  | Polr2e        | 19.42939825 | 13.44486172  | 9.749362289  | 16.0800292  | 15.6602455   | 12.484903422 | 12.0734441   | 14.74173631  | 4.884905406  | 1.965685969  | 1           | 1           | 1.037613788 | 0.053269541 |             |             |
| Q9D071 | NHP2-like protein 1 OS=Mus musculus OX=10090 GN=Sn13 PE=1 Sv=4 - [NH2L1_MOUSE]                                           | Sn13          | 78.56245258 | 0            | 0            | 0           | 0            | 0            | 81.52739143  | 0            | 0            | 0            | 0           | 1           | 1           | 1.037738987 | 0.053446886 |             |
| Q50429 | Arylsulfatase B OS=Mus musculus OX=10090 GN=Arsb PE=1 Sv=1 - [ARSB_MOUSE]                                                | Arsb          | 34.16989645 | 40.00463119  | 47.25497773  | 33.27300613 | 53.82600153  | 39.05436896  | 40.47649278  | 42.05112554  | 6.555303545  | 10.5991423   | 1           | 1           | 1.038002401 | 0.055601216 |             |             |
| Q90555 | Integrin beta-1 OS=Mus musculus OX=10090 GN=Itgb1 PE=1 Sv=1 - [ITB1_MOUSE]                                               | Itgb1         | 94.5221217  | 144.2080656  | 131.9717806  | 106.4584924 | 128.845783   | 156.4644821  | 123.5674895  | 130.895785   | 25.8874603   | 25.04857032  | 1           | 1           | 1.056274964 | 0.079766546 |             |             |
| Q92306 | RNA-binding protein Musashi homolog 2 OS=Mus musculus OX=10090 GN=Ms2 PE=1 Sv=1 - [MS2H_MOUSE]                           | Ms2           | 42.34749996 | 0            | 0            | 30.56411762 | 39.76096549  | 47.48421079  | 30.23490586  | 25.8393742   | 21.85683683  | 22.3278008   | 1           | 1           | 1.058243828 | 0.089289175 |             |             |
| Q9E778 | Carbohydrate sulfotransferase 7 OS=Mus musculus OX=10090 GN=Chst7 PE=2 Sv=1 - [CHST7_MOUSE]                              | Chst7         | 6.050532561 | 0            | 0            | 0           | 0            | 0            | 6.303831022  | 0            | 0.016844187  | 2.011702777  | 3.493276603 | 3.639518538 | 1           | 1           | 1.041863829 | 0.059116731 |
| PS6812 | Programmed cell death protein 5 OS=Mus musculus OX=10090 GN=Pcdts5 PE=1 Sv=2 - [PCD5_MOUSE]                              | Pcdts5        | 85.20902982 | 52.67339548  | 52.74234425  | 132.4642513 | 0            | 66.7701237   | 63.45158985  | 66.41165455  | 18.84276389  | 66.23285559  | 1           | 1           | 1.046650757 | 0.065780129 |             |             |
| Q61147 | Ceruloplasmin OS=Mus musculus OX=10090 GN=Cp PE=1 Sv=2 - [CEHU_MOUSE]                                                    | Cp            | 260.8206633 | 103.2153689  | 123.7041629  | 250.169442  | 148.44546    | 112.697848   | 162.5818651  | 172.037836   | 65.69649663  | 71.32566062  | 1           | 1           | 1.048381541 | 0.06807716  |             |             |
| PO8122 | Collagen alpha-2(V) chain OS=Mus musculus OX=10090 GN=Col4a2 PE=1 Sv=4 - [CO4A2_MOUSE]                                   | Col4a2        | 9.93118858  | 0            | 0            | 44.22353703 | 0            | 49.09702633  | 7.883154021  | 18.0551596   | 18.9933945   | 23.20315458  | 26.36678903 | 1           | 1           | 1.052175098 | 0.073738111 |             |
| Q9P5F7 | Protein tweety homolog 3 OS=Mus musculus OX=10090 GN=Thy3 PE=1 Sv=1 - [TTHY3_MOUSE]                                      | Thy3          | 43.12348575 | 31.03777509  | 54.97107599  | 30.00483955 | 59.9382655   | 52.2925108   | 45.04411228  | 47.1186894   | 12.47726485  | 15.55210371  | 1           | 1           | 1.02565286  | 0.073994721 |             |             |
| Q6W8Q3 | Purkinje cell protein 4-like protein 1 OS=Mus musculus OX=10090 GN=Pcp4l1 PE=1 Sv=1 - [PC4L1_MOUSE]                      | Pcp4l1        | 38.29341467 | 0            | 0            | 0           | 0            | 40.45905764  | 12.76447156  | 13.48635255  | 22.10871327  | 23.35904782  | 1           | 1           | 1.056533927 | 0.079366405 |             |             |
| Q90555 | Integrin beta-1 OS=Mus musculus OX=10090 GN=Itgb1 PE=1 Sv=1 - [ITB1_MOUSE]                                               | Itgb1         | 94.5221217  | 144.2080656  | 131.9717806  | 106.4584924 | 128.845783   | 156.4644821  | 123.5674895  | 130.895785   | 25.8874603   | 25.04857032  | 1           | 1           | 1.056274964 | 0.079766546 |             |             |
| Q92306 | RNA-binding protein Musashi homolog 2 OS=Mus musculus OX=10090 GN=Ms2 PE=1 Sv=1 - [MS2H_MOUSE]                           | Ms2           | 42.34749996 | 0            | 0            | 30.56411762 | 39.76096549  | 47.48421079  | 30.23490586  | 25.8393742   | 21.85683683  | 22.3278008   | 1           | 1           | 1.058243828 | 0.089289175 |             |             |
| PK3647 | Stress-70 protein, mitochondrial OS=Mus musculus OX=10090 GN=Hsp67 PE=1 Sv=3 - [GRP75_MOUSE]                             | Hsp69         | 206.0176007 | 11.03313238  | 85.41972129  | 129.7974763 | 120.9834543  | 70.6720996   | 100.8234851  | 107.1510404  | 98.40067408  | 31.89760048  | 1           | 1           | 1.062756882 | 0.087814045 |             |             |
| Q61292 | Laminin subunit beta-2 OS=Mus musculus OX=10090 GN=Lamb2 PE=1 Sv=2 - [LAMB2_MOUSE]                                       | Lamb2         | 206.2058856 | 214.4191389  | 105.5159057  | 25.6262661  | 246.7056386  | 180.771321   | 142.067993   | 157.004082   | 55.74127127  | 113.4999348  | 1           | 1           | 1.082706063 | 0.088508932 |             |             |
| Q8C129 | Leucyl-cystinyl aminopeptidase OS=Mus musculus OX=10090 GN=Lncpp PE=1 Sv=1 - [LCP_MOUSE]                                 | Lncpp         | 17.39291128 | 13.84908238  | 12.76697929  | 14.22249759 | 22.87916281  | 9.67500891   | 14.65623432  | 15.58972043  | 2.435458885  | 6.711108431  | 1           | 1           | 1.063685553 | 0.089071723 |             |             |
| QJ3U62 | Collagen alpha-2(V) chain OS=Mus musculus OX=10090 GN=Col5a2 PE=1 Sv=2 - [CO5A2_MOUSE]                                   | Col5a2        | 148.6105494 | 107.6789073  | 114.3017595  | 145.5889496 | 140.9696192  | 108.8187652  | 123.303754   | 131.0015437  | 21.97096953  | 20.03566252  | 1           | 1           | 1.069956554 | 0.093051432 |             |             |
| Q61768 | Kinesin-1 heavy chain OS=Mus musculus OX=10090 GN=Kif5b PE=1 Sv=3 - [KINH_MOUSE]                                         | Kif5b         | 47.89348193 | 0            | 0            | 22.54130016 | 28.56007708  | 0            | 15.9649398   | 17.03379241  | 27.65131486  | 15.05552994  | 1           | 1           | 1.066957899 | 0.093528488 |             |             |
| Q91397 | Nucleosin-delta OS=Mus musculus OX=10090 GN=Ncdl PE=1 Sv=4 - [NCADL_MOUSE]                                               | Ncdl          | 85.85218673 | 64.94927446  | 29.67122562  | 75.3830022  | 87.50640482  | 61.5528296   | 70.0576227   | 74.8140821   | 35.25108976  | 12.98613794  | 1           | 1           | 1.067894397 | 0.094762887 |             |             |
| PL3595 | Neural cell adhesion molecule 1 OS=Mus musculus OX=10090 GN=Ncam1 PE=1 Sv=3 - [NCAM1_MOUSE]                              | Ncam1         | 57.74494264 | 34.7529122   | 41.02376235  | 49.51619917 | 61.6743584   | 60.83385994  | 57.93160347  | 57.9392699   | 14.01173207  | 67.54474298  | 1           | 1           | 1.076390527 | 0.098264483 |             |             |
| Q9W755 | S-phase kinase-associated protein 2 OS=Mus musculus OX=10090 GN=Skp1 PE=1 Sv=3 - [SKP1_MOUSE]                            | Skp1          | 116.6257084 | 60.6218757   | 42.64811942  | 93.79861242 | 93.739863974 | 76.64361477  | 82.5339676   | 37.32690203  | 24.59921483  | 1            | 1           | 1.078359573 | 0.100951415 |             |             |             |
| Q61292 | Putative sodium-coupled neutral amino acid transporter 10 OS=Mus musculus OX=10090 GN=Slc38a10 PE=1 Sv=2 - [S38AA_MOUSE] | Slc38a10      | 0           | 0            | 26.19829027  | 0           | 0            | 0            | 28.08619728  | 0            | 0            | 0            | 1           | 1           | 1.071202612 | 0.099954652 |             |             |
| BA4228 | Histone H3.2 OS=Mus musculus OX=10090 GN=H3c2 PE=1 Sv=2 - [H32_MOUSE]                                                    | H3c2          | 1683.039312 | 0            | 0            | 813.675422  | 929.7550883  | 958.7253914  | 788.954537   | 832.2382448  | 892.4784789  | 841.673194   | 90.81695021 | 1           | 1           | 1.0723834   | 0.100827901 |             |
| Q9W7R5 | Cadherin-13 OS=Mus musculus OX=10090 GN=Cd13 PE=1 Sv=2 - [CAD13_MOUSE]                                                   | Cd13          | 264.2308393 | 375.2782005  | 424.0485823  | 254.4127938 | 405.591339   | 480.5952481  | 354.5192074  | 380.1998556  | 81.90622436  | 115.2091885  | 1           | 1           | 1.07243796  | 0.100894191 |             |             |
| Q9E877 | Selenoprotein F OS=Mus musculus OX=10090 GN=Seloenf1 PE=1 Sv=3 - [SEF1_MOUSE]                                            | Selenof       | 0           | 31.4222211   | 61.28566985  | 0           | 42.1914666   | 57.30548189  | 30.9026699   | 33.16562952  | 30.64614033  | 29.6977887   | 1           | 1           | 1.073227671 | 0.101956157 |             |             |
| PS7776 | Elongation factor 1-delta OS=Mus musculus OX=10090 GN=Ef1d PE=1 Sv=3 - [EF1D_MOUSE]                                      | Ef1d          | 162.4435688 | 79.6375737   | 111.0794495  | 126.5007294 | 173.7568886  | 79.19803206  | 117.72101919 | 126.488315   | 81.80052007  | 47.27633071  | 1           | 1           | 1.074388704 | 0.103583404 |             |             |
| Q9CQ17 | U2 small nuclear ribonucleoprotein B' OS=Mus musculus OX=10090 GN=Snrpb PE=1 Sv=1 - [RUB2_MOUSE]                         | Snrpb2        | 98.83427829 | 77.24082894  |              |             |              |              |              |              |              |              |             |             |             |             |             |             |

|         |                                                                                                                              |         |             |             |             |             |              |             |             |             |              |             |   |             |             |             |
|---------|------------------------------------------------------------------------------------------------------------------------------|---------|-------------|-------------|-------------|-------------|--------------|-------------|-------------|-------------|--------------|-------------|---|-------------|-------------|-------------|
| Q9Z130  | Heterogeneous nuclear ribonucleoprotein D-like O5s-Mus-musculus OX=10090 GN=Hnrrp1 PE=1 Sv=1 - [HNRDL_MOUSE]                 | Hnrrp1  | 597.3457284 | 0           | 0           | 733.3528118 | 0            | 0           | 199.1152428 | 244.4509373 | 344.877171   | 423.4014433 | 1 | 1           | 1.22758705  | 0.29594157  |
| Q61738  | Integrin alpha-7 O5s-Mus-musculus OX=10090 GN=Itga7 PE=1 Sv=1 - [ITAG_MOUSE]                                                 | Itga7   | 30.6883132  | 45.42961404 | 91.63451575 | 26.95928793 | 75.82002542  | 103.3833037 | 55.91748699 | 68.72087235 | 31.79789242  | 38.70343689 | 1 | 1           | 1.22899255  | 0.29744825  |
| Q6K4U4  | Multivesicular body subunit 12B O5s-Mus-musculus OX=10090 GN=Mvub12b PE=1 Sv=2 - [MB12B_MOUSE]                               | Mvub12b | 18.3982333  | 0           | 0           | 0           | 0            | 0           | 6.132744433 | 7.543490346 | 10.62222495  | 13.06570385 | 1 | 1           | 1.230035008 | 0.29869390  |
| Q9R118  | Serine protease HTRA1 PE=1 Sv=1 - [HTRA1_MOUSE]                                                                              | Htra1   | 112.8713735 | 56.2465547  | 99.88601551 | 90.21703992 | 148.6872377  | 94.59169202 | 89.66798123 | 111.1653238 | 29.66308639  | 32.56840503 | 1 | 1           | 1.23973438  | 0.310042011 |
| Q9W1A3  | ATP-dependent F-ubiquitinase, platelet type O5s-Mus-musculus OX=10090 GN=Hrpb PE=1 Sv=1 - [PFKAP_MOUSE]                      | Hrpb    | 16.50053442 | 0           | 0           | 14.86921640 | 0            | 5.593173211 | 5.500178139 | 6.820796564 | 9.526587987  | 7.510239278 | 1 | 1           | 1.240106664 | 0.310045888 |
| Q921A3  | 60S ribosomal protein L32 O5s-Mus-musculus OX=10090 GN=Rpsl2 PE=1 Sv=2 - [RLS2_MOUSE]                                        | Rpsl2   | 60.44003992 | 0           | 0           | 27.38917823 | 48.42952659  | 0           | 1.182336554 | 1.543842654 | 2.04766982   | 24.3815354  | 1 | 1           | 1.254861511 | 0.32752515  |
| Q1027   | Complement C3 O5s-Mus-musculus OX=10090 GN=C3 PE=1 Sv=3 - [C3_MOUSE]                                                         | C3      | 0           | 42.35354343 | 0           | 53.36802633 | 0            | 0           | 14.11784781 | 17.78935413 | 24.4528297   | 30.1026159  | 1 | 1           | 1.260061333 | 0.333493959 |
| P13H56  | Sadenosylmethionine synthase isoform type-2 O5s-Mus-musculus OX=10090 GN=Mat2a PE=1 Sv=2 - [METK2_MOUSE]                     | Mat2a   | 11.91859525 | 0           | 0           | 79.83706363 | 66.38420557  | 0           | 38.28651749 | 48.74127562 | 66.31419354  | 42.74361024 | 1 | 1           | 1.273066312 | 0.348307569 |
| Q9D015  | Retinol-binding protein 1 O5s-Mus-musculus OX=10090 GN=Rbp1 PE=1 Sv=2 - [RET1_MOUSE]                                         | Rbp1    | 110.3393181 | 0           | 0           | 105.4352992 | 35.14509975  | 0           | 36.7797727  | 46.860133   | 63.70443501  | 53.68502264 | 1 | 1           | 1.27407348  | 0.349448485 |
| Q9D6R2  | Isocitrate dehydrogenase [NAD] subunit alpha, mitochondrial O5s-Mus-musculus OX=10090 GN=Ihdh3a PE=1 Sv=1 - [IDH3A_MOUSE]    | Ihdh3a  | 50.8633172  | 0           | 0           | 38.17618986 | 27.04383317  | 0           | 16.95439004 | 21.73897975 | 29.36594983  | 19.63291258 | 1 | 1           | 1.282525966 | 0.358609809 |
| Q9JH0   | Tropomodulin-3 O5s-Mus-musculus OX=10090 GN=Tmod3 PE=1 Sv=1 - [TMOD3_MOUSE]                                                  | Tmod3   | 103.5066491 | 0           | 0           | 60.92718442 | 72.1921476   | 0           | 34.50221636 | 44.37311067 | 59.79599171  | 38.83828202 | 1 | 1           | 1.286094995 | 0.362996653 |
| P97311  | DNA replication licensing factor MCM6 O5s-Mus-musculus OX=10090 GN=Mcm6 PE=1 Sv=1 - [MCM6_MOUSE]                             | Mcm6    | 26.89512597 | 0           | 0           | 0           | 0            | 0           | 8.965041989 | 11.53462824 | 15.52790822  | 19.97856212 | 1 | 1           | 1.286622891 | 0.363589261 |
| Q6O876  | Eukaryotic translation initiation factor 4E-binding protein 1 O5s-Mus-musculus OX=10090 GN=Elbap1 PE=1 Sv=3 - [4EBP1_MOUSE]  | Elbap1  | 78.09511139 | 0           | 0           | 63.03769033 | 37.49947228  | 0           | 26.0317038  | 33.5123875  | 45.08823359  | 31.70741607 | 1 | 1           | 1.287368195 | 0.364427432 |
| Q9D005  | General transcription factor IIE subunit 1 O5s-Mus-musculus OX=10090 GN=GTF2I PE=1 Sv=1 - [T2EA_MOUSE]                       | Gtf2i   | 3.547009651 | 0           | 0           | 2.382724402 | 2.240253557  | 0           | 1.182336554 | 1.543842654 | 2.04766982   | 1.338602041 | 1 | 1           | 1.305755666 | 0.368409664 |
| Q91WKS  | Glycine cleavage system H protein, mitochondrial O5s-Mus-musculus OX=10090 GN=Gcsh PE=1 Sv=2 - [TCSH_MOUSE]                  | Gcsh    | 0           | 157.976123  | 112.9792422 | 131.0407943 | 125.1722331  | 97.86758412 | 90.31845506 | 118.0268705 | 81.38947914  | 17.70323237 | 1 | 1           | 1.306785755 | 0.386022633 |
| Q10153  | Transitional endoplasmic reticulum ATPase O5s-Mus-musculus OX=10090 GN=Vcp PE=1 Sv=4 - [TERA_MOUSE]                          | Vcp     | 1125.675607 | 521.0932457 | 359.9809993 | 999.3779831 | 1102.676616  | 520.4210968 | 668.8123175 | 974.1585656 | 603.6890579  | 310.6691158 | 1 | 1           | 1.306835803 | 0.386077868 |
| Q8CHP8  | Glycerol-3-phosphate phosphatase O5s-Mus-musculus OX=10090 GN=Pgp PE=1 Sv=1 - [PGP_MOUSE]                                    | Pgp     | 12.2805799  | 29.9730256  | 11.60292927 | 106.871156  | 120.42586897 | 67.7144441  | 88.8398777  | 48.23786762 | 40.87875094  | 1           | 1 | 1.311455331 | 0.391166689 |             |
| Q8R3G1  | Serine inhibitor of protein phosphatase 1 O5s-Mus-musculus OX=10090 GN=Pp1r1 PE=1 Sv=1 - [PP1R_MOUSE]                        | Pp1r1   | 11.3625961  | 0           | 0           | 14.9519669  | 0            | 0           | 3.787652052 | 4.983988967 | 6.560405795  | 8.632521216 | 1 | 1           | 1.318581852 | 0.395970679 |
| Q9D8U8  | Nocoring nexin-5 O5s-Mus-musculus OX=10090 GN=Snx5 PE=1 Sv=1 - [SNX5_MOUSE]                                                  | Snx5    | 36.25627692 | 0           | 0           | 47.78058098 | 0            | 0           | 12.08542564 | 15.92686033 | 20.93257124  | 27.58613129 | 1 | 1           | 1.317856797 | 0.398193611 |
| Q9JLV5  | Cullin-3 O5s-Mus-musculus OX=10090 GN=Cul3 PE=1 Sv=1 - [CUL3_MOUSE]                                                          | Cul3    | 23.8561828  | 0           | 0           | 18.44789975 | 19.80361802  | 0           | 4.645379428 | 12.75050593 | 16.70628723  | 11.06304859 | 1 | 1           | 1.321928971 | 0.402645669 |
| Q89051  | Integral membrane protein 2B O5s-Mus-musculus OX=10090 GN=Itim2b PE=1 Sv=1 - [ITM2B_MOUSE]                                   | Itim2b  | 27.09313828 | 0           | 0           | 0           | 0            | 0           | 29.9953043  | 31.79842545 | 41.60380172  | 30.22678963 | 1 | 1           | 1.322562811 | 0.404746499 |
| Q51686  | Chromatin protein homolog 5 O5s-Mus-musculus OX=10090 GN=Cx5 PE=1 Sv=1 - [CBX5_MOUSE]                                        | Cx5     | 34.72361416 | 67.03892102 | 0           | 0           | 0            | 0           | 34.72361416 | 35.15350545 | 42.93257099  | 33.2441108  | 1 | 1           | 1.323782746 | 0.415926899 |
| Q9N4H0  | Ankyrin repeat domain-containing protein 17 O5s-Mus-musculus OX=10090 GN=Ankd17 PE=1 Sv=2 - [ANKR17_MOUSE]                   | Ankd17  | 18.52949133 | 0           | 0           | 11.15041332 | 13.65962028  | 0           | 1.67497709  | 8.27001387  | 10.69800785  | 7.277108025 | 1 | 1           | 1.338948747 | 0.421100737 |
| Q61490  | C166 ankyrin O5s-Mus-musculus OX=10090 GN=Alcam PE=1 Sv=3 - [C166_MOUSE]                                                     | Alcam   | 25.9911028  | 0           | 31.91302878 | 25.28204392 | 32.06512439  | 20.24324535 | 19.2470036  | 15.92211627 | 16.9177639   | 5.932347706 | 1 | 1           | 1.340444481 | 0.422711036 |
| Q9EFC1  | Alpha-parvin O5s-Mus-musculus OX=10090 GN=Parva PE=1 Sv=1 - [PARVA_MOUSE]                                                    | Parva   | 48.85229268 | 0           | 0           | 48.15219035 | 17.6086473   | 0           | 16.28409756 | 15.92027929 | 28.20488433  | 24.36392809 | 1 | 1           | 1.346115694 | 0.42880241  |
| PA6935  | E3 ubiquitin-protein ligase NEDD4 O5s-Mus-musculus OX=10090 GN=Nedd4 PE=1 Sv=3 - [NEDD4_MOUSE]                               | Nedd4   | 0           | 20.01941828 | 13.59832034 | 9.241840043 | 16.15388494  | 19.93743632 | 11.20591288 | 15.11100594 | 20.12218875  | 5.423519634 | 1 | 1           | 1.348489326 | 0.431344012 |
| Q80788  | Dynactin subunit 1 O5s-Mus-musculus OX=10090 GN=Dctn1 PE=1 Sv=3 - [DCTN1_MOUSE]                                              | Dctn1   | 51.87514992 | 0           | 0           | 36.38156407 | 34.1020051   | 0           | 17.29049967 | 23.4945206  | 29.94802392  | 20.3787526  | 1 | 1           | 1.35881111  | 0.442344919 |
| Q9E7R2  | Cysteine-tRNA ligase, cytoplasmic O5s-Mus-musculus OX=10090 GN=Cars1 PE=1 Sv=2 - [SYCC_MOUSE]                                | Cars1   | 98.57278602 | 0           | 24.01978789 | 63.9436627  | 81.90632452  | 21.05680828 | 40.87557188 | 55.6359858  | 51.38865568  | 31.26393857 | 1 | 1           | 1.368169723 | 0.445406694 |
| Q9R1V6  | Disintegrin and metalloproteinase domain-containing protein 22 O5s-Mus-musculus OX=10090 GN=Adam22 PE=1 Sv=2 - [ADAM2_MOUSE] | Adam22  | 0           | 0           | 24.9598091  | 0           | 0            | 0           | 8.319936368 | 11.34707962 | 14.4105525   | 19.65371842 | 1 | 1           | 1.363842116 | 0.447676642 |
| Q5C7G7  | Mitochondrial import receptor subunit TOM34 O5s-Mus-musculus OX=10090 GN=Tom34 PE=1 Sv=1 - [TOM34_MOUSE]                     | Tom34   | 9.983712432 | 0           | 0           | 13.67808277 | 0            | 0           | 3.331237477 | 4.55924566  | 5.769872563  | 7.897012974 | 1 | 1           | 1.368663326 | 0.452767606 |
| Q5Q5F5  | Leucine-rich repeat-containing protein 47 O5s-Mus-musculus OX=10090 GN=Lrrc47 PE=1 Sv=1 - [LRRC47_MOUSE]                     | Lrrc47  | 23.04861789 | 0           | 0           | 17.06782056 | 14.59761883  | 0           | 7.688297631 | 10.55514948 | 13.30712574  | 9.224091862 | 1 | 1           | 1.37385454  | 0.458229162 |
| Q9P9F1  | Hsp70-binding protein 1 O5s-Mus-musculus OX=10090 GN=Hspb1 PE=1 Sv=1 - [HPB1_MOUSE]                                          | Hspb1   | 29.8767968  | 0           | 0           | 41.27402949 | 0            | 0           | 9.98025558  | 13.75800983 | 17.24036679  | 23.82957204 | 1 | 1           | 1.381475177 | 0.466209639 |
| Q80TV8  | CLIP-associating protein 1 O5s-Mus-musculus OX=10090 GN=Clasp1 PE=1 Sv=2 - [CLAP1_MOUSE]                                     | Clasp1  | 19.75287414 | 0           | 0           | 41.25193202 | 68.7034799   | 0           | 26.52429138 | 36.65176    | 45.9414203   | 34.5819128  | 1 | 1           | 1.381818631 | 0.466568269 |
| Q8K4F5  | Protein ABHD11 O5s-Mus-musculus OX=10090 GN=Abhd11 PE=1 Sv=1 - [ABHD8_MOUSE]                                                 | Abhd11  | 19.91349133 | 0           | 5990007535  | 19.70170516 | 16.16625936  | 0           | 8.63449962  | 11.95589832 | 10.21674058  | 10.50400341 | 1 | 1           | 1.384676455 | 0.469584914 |
| Q9E528  | Rho guanine nucleotide exchange factor 7 O5s-Mus-musculus OX=10090 GN=Arhef7 PE=1 Sv=2 - [ARHG7_MOUSE]                       | Arhef7  | 23.82269379 | 0           | 0           | 9.705329296 | 23.54699349  | 0           | 7.94089793  | 11.08401759 | 13.75403867  | 11.83389191 | 1 | 1           | 1.395828247 | 0.481118564 |
| Q9D883  | Splicing factor UZAF 35 kDa subunit O5s-Mus-musculus OX=10090 GN=Uzaf1 PE=1 Sv=4 - [UZAF1_MOUSE]                             | Uzaf1   | 14.87554689 | 0           | 0           | 0           | 0            | 0           | 4.958515629 | 6.92131887  | 8.588400999  | 11.98807594 | 1 | 1           | 1.395844924 | 0.481138669 |
| Q9NSR8  | Proteinase inhibitor NPEPL1 O5s-Mus-musculus OX=10090 GN=Npepl1 PE=1 Sv=1 - [PEPL1_MOUSE]                                    | Npepl1  | 69.82082888 | 0           | 0           | 67.94262029 | 29.6581142   | 0           | 23.2760896  | 32.53614391 | 40.3110732   | 34.06213469 | 1 | 1           | 1.397984471 | 0.483138653 |
| P97315  | Cytosine and glycine-rich protein 1 O5s-Mus-musculus OX=10090 GN=Csrp1 PE=1 Sv=3 - [CSRP1_MOUSE]                             | Csrp1   | 57.48626371 | 0           | 0           | 50.26923435 | 31.63580062  | 0           | 19.49687457 | 27.30435412 | 33.77304144  | 25.41326952 | 1 | 1           | 1.400154554 | 0.485858779 |
| Q80979  | Catamer subunit apofin O5s-Mus-musculus OX=10090 GN=Cope PE=1 Sv=3 - [COPE_MOUSE]                                            | Cope    | 47.10027739 | 0           | 0           | 36.88850806 | 68.81181219  | 41.61304492 | 34.94079774 | 49.1045534  | 30.7212179   | 17.2977788  | 1 | 1           | 1.405822125 | 0.489492125 |
| PL11214 | Tissue-type plasminogen activator O5s-Mus-musculus OX=10090 GN=Plat PE=1 Sv=3 - [TPA_MOUSE]                                  | Plat    | 0           | 99.1881524  | 0           | 22.91535775 | 0            | 32.33964888 | 13.06271747 | 18.41833554 | 22.6259033   | 16.6322166  | 1 | 1           | 1.409592645 | 0.495867387 |
| Q80599  | Syntaxin-binding protein 1 O5s-Mus-musculus OX=10090 GN=Stxbp1 PE=1 Sv=2 - [STXB1_MOUSE]                                     | Stxbp1  | 31.61981672 | 0           | 0           | 40.84809295 | 0            | 0           | 10.5393891  | 14.93630765 | 18.520570969 | 25.87044373 | 1 | 1           | 1.411711502 | 0.502957044 |
| Q9D2L1  | Arylsulfatase K O5s-Mus-musculus OX=10090 GN=Arsk PE=2 Sv=2 - [ARSK_MOUSE]                                                   | Arsk    | 9.118435786 | 0           | 0           | 13.0960068  | 0            | 0           | 3.039478958 | 4.365360152 | 5.264531356  | 7.56102553  | 1 | 1           | 1.436220088 | 0.525276816 |
| Q9E722  | Dipeptidyl peptidase 2 O5s-Mus-musculus OX=10090 GN=Dpp2 PE=1 Sv=2 - [DPP2_MOUSE]                                            | Dpp2    | 18.28964794 | 13.88916214 | 0           | 18.01516264 | 16.51166368  | 11.72983666 | 10.7627062  | 15.41889    | 9.546241873  | 3.282067704 | 1 | 1           | 1.437488437 | 0.523550351 |
| Q8CH18  | Cell division cycle and apoptosis regulator protein 1 O5s-Mus-musculus OX=10090 GN=Ccar1 PE=1 Sv=1 - [CCAR1_MOUSE]           | Ccar1   | 66.77641089 | 0           | 0           | 53.25374261 | 42.96798833  | 0           | 22.254703   | 32.07391031 | 38.5470655   | 28.24891108 | 1 | 1           | 1.441169739 | 0.527240264 |
| Q9J916  | THUMP domain-containing protein 1 O5s-Mus-musculus OX=10090 GN=Thumpd1 PE=1 Sv=1 - [THUM1_MOUSE]                             | Thumpd1 | 38.23499934 | 0           | 0           | 36.88086422 | 0            | 19.15800811 | 12.91230311 | 18.6792411  | 22.36476504  | 18.44058538 | 1 | 1           | 1.445639316 | 0.532717905 |
| Q8HRF5  | Elongation factor Tu, mitochondrial O5s-Mus-musculus OX=10090 GN=Tuftm PE=1 Sv=1 - [EF1U_MOUSE]                              | Tuftm   | 32.24314483 | 0           | 0           | 21.67764759 | 25.20488008  | 0           | 10.74771483 | 16.62170789 | 18.61558815  | 13.64797553 | 1 | 1           | 1.446593536 | 0.540028083 |
| Q80283  | RAC-beta serine/threonine protein kinase O5s-Mus-musculus OX=10090 GN=Rkt1 PE=1 Sv=1 - [RKT2_MOUSE]                          | Rkt1    | 14.83614994 | 0           | 0           | 11.91397611 | 0            | 6.93037847  | 4.94530332  | 7.20462639  | 9.95565159   | 6.337638594 | 1 | 1           | 1.456766014 | 0.542765179 |
| Q9D7G0  | Ribose-phosphate pyrophosphokinase 1 O5s-Mus-musculus OX=10090 GN=Ppys1 PE=1 Sv=4 - [PPRS1_MOUSE]                            | Pp      |             |             |             |             |              |             |             |             |              |             |   |             |             |             |

|        |                                                                                                                                      |          |             |             |             |             |             |             |             |             |             |             |   |   |             |             |
|--------|--------------------------------------------------------------------------------------------------------------------------------------|----------|-------------|-------------|-------------|-------------|-------------|-------------|-------------|-------------|-------------|-------------|---|---|-------------|-------------|
| O35344 | Importin subunit alpha-4 OS=Mus musculus OX=10090 GN=Kpna3 PE=1 SV=1 - [JMA4_MOUSE]                                                  | Kpna3    | 29.29329245 | 0           | 0           | 0           | 52.62893532 | 0           | 9.76440817  | 17.54297844 | 16.91249028 | 30.38532997 | 1 | 1 | 1.796620691 | 0.845285854 |
| Q8C195 | Oxysterol-binding protein-related protein 11 OS=Mus musculus OX=10090 GN=Osbp11 PE=1 SV=2 - [OSB11_MOUSE]                            | Osbp11   | 4.379693982 | 0           | 0           | 4.018005577 | 3.851923003 | 0           | 1.459897994 | 2.623309527 | 2.528617499 | 2.273369858 | 1 | 1 | 1.796912892 | 0.845520474 |
| Q71LX4 | Talin-2 OS=Mus musculus OX=10090 GN=Tin2 PE=1 SV=3 - [TLN2_MOUSE]                                                                    | Tin2     | 100.58569   | 0           | 0           | 87.46324155 | 93.55860742 | 0           | 33.52856332 | 60.34061632 | 58.07317518 | 52.34530404 | 1 | 1 | 1.799677957 | 0.847738767 |
| Q8VE70 | Programmed cell death protein 10 OS=Mus musculus OX=10090 GN=Pdcf10 PE=1 SV=1 - [PDC10_MOUSE]                                        | Pdcf10   | 65.36118084 | 0           | 0           | 55.29850775 | 62.35606387 | 0           | 21.78706028 | 39.21819054 | 37.73629535 | 34.1467733  | 1 | 1 | 1.800068024 | 0.848051426 |
| P42569 | Transcriptional activator protein Pur-alpha OS=Mus musculus OX=10090 GN=PuPa PE=1 SV=1 - [PURA_MOUSE]                                | PuPa     | 43.22074838 | 0           | 0           | 36.16420467 | 41.70112239 | 0           | 14.40674793 | 25.95510902 | 24.95321939 | 22.64762962 | 1 | 1 | 1.801593868 | 0.849273838 |
| Q99H8B | Ubiquitin-4 OS=Mus musculus OX=10090 GN=Ublq4 PE=1 SV=1 - [UBQL4_MOUSE]                                                              | Ublq4    | 33.91999587 | 0           | 0           | 31.31928178 | 29.8379505  | 0           | 11.30666529 | 20.38574409 | 19.58371875 | 17.67010207 | 1 | 1 | 1.802984661 | 0.850387123 |
| Q63844 | Mitogen-activated protein kinase 3 OS=Mus musculus OX=10090 GN=Mapk3 PE=1 SV=5 - [MK03_MOUSE]                                        | Mapk3    | 345.2951928 | 0           | 0           | 333.250108  | 293.7896802 | 0           | 115.0983976 | 209.0095961 | 199.3562725 | 182.0791662 | 1 | 1 | 1.815209099 | 0.860701432 |
| Q3T108 | Pre-B-cell leukemia transcription factor-interacting protein 1 OS=Mus musculus OX=10090 GN=Pbip1 PE=1 SV=2 - [PBIP1_MOUSE]           | Pbip1    | 41.46210371 | 0           | 0           | 38.76597224 | 37.30626533 | 0           | 13.82017214 | 25.35741252 | 23.93815674 | 21.97228854 | 1 | 1 | 1.834741805 | 0.875576232 |
| Q6WVG3 | BTB/POZ domain-containing protein KCTD12 OS=Mus musculus OX=10090 GN=Kctd12 PE=1 SV=1 - [KCD12_MOUSE]                                | Kctd12   | 100.0549693 | 0           | 0           | 27.36967996 | 29.67059994 | 0           | 10.35116564 | 19.01342663 | 17.92874481 | 16.50625192 | 1 | 1 | 1.836839182 | 0.877225322 |
| P63276 | 40S ribosomal protein S17 OS=Mus musculus OX=10090 GN=Rps17 PE=1 SV=2 - [RS17_MOUSE]                                                 | Rps17    | 100.3959156 | 0           | 0           | 87.75960907 | 97.8700726  | 0           | 33.46530521 | 61.87656056 | 57.96360891 | 53.82459408 | 1 | 1 | 1.84897643  | 0.886726834 |
| P70362 | Ubiquitin recognition factor in ER-associated degradation protein 1 OS=Mus musculus OX=10090 GN=Ufd1 PE=1 SV=2 - [UFD1_MOUSE]        | Ufd1     | 227.7266091 | 0           | 0           | 212.4530929 | 210.9137942 | 0           | 75.9088697  | 141.1222957 | 131.4780191 | 122.2179165 | 1 | 1 | 1.85901529  | 0.89466856  |
| Q8BVY0 | Ribosomal L1 domain-containing protein 1 OS=Mus musculus OX=10090 GN=Rsl1d1 PE=1 SV=1 - [RL1D1_MOUSE]                                | Rsl1d1   | 21.88911929 | 0           | 0           | 19.18763821 | 21.68768226 | 0           | 7.296373095 | 13.62510682 | 12.63768891 | 11.86571562 | 1 | 1 | 1.867380772 | 0.901016133 |
| O35593 | 26S proteasome non-ATPase regulatory subunit 14 OS=Mus musculus OX=10090 GN=Psm14 PE=1 SV=2 - [PSD5_MOUSE]                           | Psm14    | 66.5662738  | 0           | 0           | 66.11504296 | 60.31020579 | 0           | 22.18880913 | 42.14174958 | 38.43214477 | 36.61105471 | 1 | 1 | 1.8992344   | 0.925417971 |
| Q9R0Y5 | Adenylyate kinase isoenzyme 1 OS=Mus musculus OX=10090 GN=Ak1 PE=1 SV=1 - [KAD1_MOUSE]                                               | Ak1      | 28.44527555 | 0           | 0           | 27.50985521 | 26.87374678 | 0           | 9.48175885  | 18.12787066 | 16.42288807 | 15.70241806 | 1 | 1 | 1.91186793  | 0.934982867 |
| Q9ERF3 | WD repeat-containing protein 61 OS=Mus musculus OX=10090 GN=Wdr61 PE=1 SV=1 - [WDR61_MOUSE]                                          | Wdr61    | 4.989869469 | 0           | 0           | 9.545053006 | 0           | 0           | 1.663289823 | 3.181684335 | 2.88902481  | 5.510838923 | 1 | 1 | 1.912886312 | 0.935751133 |
| PS3811 | Phosphatidylinositol transfer protein beta isoform OS=Mus musculus OX=10090 GN=Pltpnb PE=1 SV=2 - [PIPNB_MOUSE]                      | Pltpnb   | 136.4535265 | 0           | 0           | 128.5025698 | 133.2803562 | 0           | 45.48450884 | 87.26097532 | 78.78148027 | 75.60797029 | 1 | 1 | 1.918476808 | 0.939961324 |
| Q9D1P4 | Cysteine and histidine-rich domain-containing protein 1 OS=Mus musculus OX=10090 GN=Chordc1 PE=1 SV=1 - [CHRD1_MOUSE]                | Chordc1  | 3.979044889 | 0           | 0           | 58.43509623 | 56.27922632 | 0           | 19.90189966 | 38.2801752  | 34.47110138 | 33.13271718 | 1 | 1 | 1.92132953  | 0.942104929 |
| Q9CWL8 | Beta-catenin-like protein 1 OS=Mus musculus OX=10090 GN=Ctnbl1 PE=1 SV=1 - [CTBL1_MOUSE]                                             | Ctnbl1   | 1.979044889 | 0           | 0           | 0           | 7.727524489 | 0           | 1.326348163 | 2.958441496 | 2.297302407 | 4.461488344 | 1 | 1 | 1.942055313 | 0.957584291 |
| Q9JM14 | 5(3')-deoxyribonucleotidase, cytosolic type OS=Mus musculus OX=10090 GN=Nt5c PE=1 SV=1 - [NT5C_MOUSE]                                | Nt5c     | 71.31846855 | 0           | 0           | 70.8859382  | 67.8799352  | 0           | 23.77282285 | 46.25529113 | 41.1753701  | 40.08644386 | 1 | 1 | 1.945721441 | 0.960305182 |
| Q61239 | Protein farnesyltransferase/geranylgeranyltransferase type-1 subunit alpha OS=Mus musculus OX=10090 GN=Fnta PE=1 SV=1 - [FNTA_MOUSE] | Fnta     | 10.9904186  | 0           | 0           | 21.49701064 | 0           | 0           | 3.663472867 | 7.165670213 | 6.345321137 | 12.41130488 | 1 | 1 | 1.955977422 | 0.967889717 |
| O56925 | Probable ATP-dependent RNA helicase DDX46 OS=Mus musculus OX=10090 GN=Ddx46 PE=1 SV=2 - [DDX46_MOUSE]                                | Ddx46    | 25.11595138 | 0           | 0           | 24.69700675 | 24.52842526 | 0           | 8.371983793 | 16.40847734 | 14.50070129 | 14.2104082  | 1 | 1 | 1.959927031 | 0.970799943 |
| Q08759 | Ubiquitin-protein ligase E3A OS=Mus musculus OX=10090 GN=Ube3a PE=1 SV=2 - [UBES3_MOUSE]                                             | Ube3a    | 19.06696041 | 0           | 0           | 38.96492531 | 0           | 0           | 6.355653469 | 12.98830844 | 11.00031472 | 22.49641011 | 1 | 1 | 2.04358348  | 1.031101178 |
| O35343 | Importin subunit alpha-3 OS=Mus musculus OX=10090 GN=Kpna4 PE=1 SV=1 - [JMA3_MOUSE]                                                  | Kpna4    | 10.79662593 | 0           | 0           | 0           | 22.0856942  | 0           | 3.598875311 | 7.361898067 | 6.233434889 | 12.75118149 | 1 | 1 | 2.045610762 | 1.032531656 |
| Q8VH88 | Tudor-interacting repair regulator protein OS=Mus musculus OX=10090 GN=Nudt16l1 PE=1 SV=2 - [TIRR_MOUSE]                             | Nudt16l1 | 9.145818019 | 0           | 0           | 0           | 19.18806448 | 0           | 3.048606006 | 6.396021495 | 5.280340495 | 11.07823419 | 1 | 1 | 2.098015119 | 1.069025075 |
| Q9J108 | SEC14-like protein 2 OS=Mus musculus OX=10090 GN=Sec14l2 PE=1 SV=1 - [S14L2_MOUSE]                                                   | Sec14l2  | 11.34398022 | 0           | 0           | 0           | 25.05876816 | 0           | 3.78132674  | 6.352922719 | 6.549450033 | 14.46768654 | 1 | 1 | 2.208992582 | 1.143388574 |
| Q9Z100 | Probable carboxypeptidase X1 OS=Mus musculus OX=10090 GN=Cpxm1 PE=2 SV=2 - [CPXM1_MOUSE]                                             | Cpxm1    | 0           | 0           | 11.94831091 | 0           | 26.51007666 | 0           | 3.982770302 | 8.8369222   | 6.898360518 | 15.3055999  | 1 | 1 | 2.218730067 | 1.149734159 |
| Q9CS42 | Ribose-phosphate pyrophosphokinase 2 OS=Mus musculus OX=10090 GN=Prps2 PE=1 SV=4 - [PRPS2_MOUSE]                                     | Prps2    | 0           | 25.98326336 | 0           | 0           | 0           | 58.52530151 | 8.661087788 | 19.50843384 | 15.0014441  | 33.78959858 | 1 | 1 | 2.252423058 | 1.171477825 |
| Q55WU9 | Acetyl-CoA carboxylase 1 OS=Mus musculus OX=10090 GN=Acaca PE=1 SV=1 - [ACACA_MOUSE]                                                 | Acaca    | 4.675796451 | 0           | 0           | 0           | 11.14004596 | 0           | 1.558598817 | 3.713488654 | 2.69957234  | 6.431708536 | 1 | 1 | 2.382491642 | 1.252471153 |
| Q3T126 | Protein FAM98A OS=Mus musculus OX=10090 GN=Fam98a PE=1 SV=1 - [FA98A_MOUSE]                                                          | Fam98a   | 0.944201609 | 0           | 0           | 2.362896455 | 0           | 0           | 0.31473387  | 0.787632152 | 0.545135053 | 1.364218904 | 1 | 1 | 2.502533817 | 1.323389564 |
| P62849 | 40S ribosomal protein S24 OS=Mus musculus OX=10090 GN=Rps24 PE=1 SV=1 - [RS24_MOUSE]                                                 | Rps24    | 48.20497996 | 0           | 0           | 0           | 121.0033751 | 0           | 16.06832665 | 40.33445836 | 27.83115816 | 69.86133117 | 1 | 1 | 2.510184117 | 1.327795187 |
| Q8C676 | Allatoin B1 aldehyde reductase member 2 OS=Mus musculus OX=10090 GN=Akr72 PE=1 SV=3 - [ARK72_MOUSE]                                  | Akr72    | 14.70666007 | 0           | 0           | 45.32536624 | 0           | 0           | 4.902886999 | 15.10845541 | 8.492049212 | 26.16865124 | 1 | 1 | 3.081542717 | 1.62365279  |
| Q70258 | Epsilon-sarcoglycan OS=Mus musculus OX=10090 GN=Sgce PE=1 SV=2 - [SGCE_MOUSE]                                                        | Sgce     | 0           | 0           | 7.442651811 | 0           | 25.62014638 | 0           | 2.480883937 | 8.540048794 | 4.297017026 | 14.79179841 | 1 | 1 | 3.442341122 | 1.78339007  |
| Q80T53 | Adhesion G protein-coupled receptor L3 OS=Mus musculus OX=10090 GN=Adgrl3 PE=1 SV=3 - [AGRL3_MOUSE]                                  | Adgrl3   | 23.06926368 | 0           | 0           | 0           | 0           | 87.80535507 | 7.689754559 | 29.26845169 | 13.31094559 | 50.6944539  | 1 | 1 | 3.806162013 | 1.928336973 |
| Q8RF7  | Sec1 family domain-containing protein 1 OS=Mus musculus OX=10090 GN=Scd1 PE=1 SV=1 - [SCFD1_MOUSE]                                   | Scd1     | 6.418955689 | 0           | 0           | 0           | 30.07012483 | 0           | 2.139651896 | 10.02337494 | 3.705985795 | 17.36099466 | 1 | 1 | 4.684582085 | 2.22792035  |
| QD0D59 | Histidine triad nucleotide-binding protein 2, mitochondrial OS=Mus musculus OX=10090 GN=Hint2 PE=1 SV=1 - [HINT2_MOUSE]              | Hint2    | 3.807122557 | 0           | 0           | 75.6328544  | 0           | 0           | 1.269040852 | 25.21095147 | 2.198043233 | 43.66664885 | 1 | 1 | 8.186164648 | 4.312240149 |
